# Supplementary material
Source: PubMed Central journal article supplement (PMC3746774)

## SUPPLEMENTARY MATERIAL

## Condensation reactions of guanidines with bis-electrophiles: Formation of highly nitrogenous heterocycles

David M. Arnold, Matthew G. LaPorte, Shelby M. Anderson and Peter Wipf\*

*University of Pittsburgh, Center for Chemical Methodologies and Library Development,  
Pittsburgh, PA 15260, USA*

pwipf@pitt.edu

Copies of  $^1\text{H}$  NMR and  $^{13}\text{C}$  NMR spectra for **10a**, **10b**, **10c**, **10a•HCl**, **13**, **13•TFA**, **18•HCl**, **19**, **22**, **23**, **24**, **25**, **27**, **30**, **31**, **38a**, **38b**, **38c**, **38d**, **40**, **41**, **42**, **43**, **44**, **45**, **46**, **48d**, **49a**, **49b**, **49c**, **49d**, **49e**, **49f**, **49g**, **49h**, and **49i**, and copies of  $^1\text{H}$  NMR spectra for **10b•HCl**, **10c•HCl**, and **18**.

## CONTENTS

|                                                                                                                                                                   |       |
|-------------------------------------------------------------------------------------------------------------------------------------------------------------------|-------|
| $^1\text{H}$ NMR and $^{13}\text{C}$ NMR Spectra of Ethyl 2-amino-4,6-dimethyl-1,4-dihydropyrimidine-5-carboxylate ( <b>10a</b> ).                                | 4-5   |
| .....                                                                                                                                                             |       |
| $^1\text{H}$ NMR and $^{13}\text{C}$ NMR Spectra of Ethyl 2-amino-6-methyl-4-(2-phenethyl)-1,4-dihydropyrimidine-5-carboxylate ( <b>10b</b> )                     | 6-7   |
| .....                                                                                                                                                             |       |
| $^1\text{H}$ NMR and $^{13}\text{C}$ NMR Spectra of Ethyl 2-amino-4-(methylethyl)-6-methyl-1,4-dihydropyrimidine-5-carboxylate ( <b>10c</b> )                     | 8-9   |
| .....                                                                                                                                                             |       |
| $^1\text{H}$ NMR and $^{13}\text{C}$ NMR Spectra of Ethyl 2-imino-4,6-dimethyl-1,2,3,4-tetrahydropyrimidine-5-carboxylate hydrochloride ( <b>10a•HCl</b> )        | 10-11 |
| .....                                                                                                                                                             |       |
| $^1\text{H}$ NMR Spectrum of Ethyl 2-imino-6-methyl-4-(2-phenethyl)-1,2,3,4-tetrahydropyrimidine-5-carboxylate hydrochloride ( <b>10b•HCl</b> )                   | 12    |
| .....                                                                                                                                                             |       |
| $^1\text{H}$ NMR Spectrum of Ethyl 2-imino-4-(methylethyl)-6-methyl-1,2,3,4-tetrahydropyrimidine-5-carboxylate hydrochloride ( <b>10c•HCl</b> )                   | 13    |
| .....                                                                                                                                                             |       |
| $^1\text{H}$ NMR and $^{13}\text{C}$ NMR Spectra of 11-(4-(4-Chlorophenyl)-2-((4-methoxybenzylamino)-6-methyl-1,4-dihydropyrimidin-5-yl)butan-1-one ( <b>13</b> ) | 14-15 |
| .....                                                                                                                                                             |       |

---

\* Corresponding author. Tel.: +1-412-624-8606; fax: +1-412-624-0787; e-mail: pwipf@pitt.edu

|                                                                                                                                                                                   |       |
|-----------------------------------------------------------------------------------------------------------------------------------------------------------------------------------|-------|
| <sup>1</sup> H NMR and <sup>13</sup> C NMR Spectra of Ethyl 2-amino-4-(4-chlorophenyl)-6-methyl-1,4-dihydropyrimidine-5-carboxylate 2,2,2-trifluoroacetate ( <b>13•TFA</b> )..... | 16-17 |
| <sup>1</sup> H NMR Spectrum of Ethyl 2-amino-4,6-diphenyl-1,4-dihydropyrimidine-5-carboxylate ( <b>18</b> ).....                                                                  | 18    |
| <sup>1</sup> H NMR and <sup>13</sup> C NMR Spectra of Ethyl 2-imino-4,6-diphenyl-1,2,3,4-tetrahydropyrimidine-5-carboxylate hydrochloride ( <b>18•HCl</b> ).....                  | 19-20 |
| <sup>1</sup> H NMR and <sup>13</sup> C NMR Spectra of Ethyl 2-amino-4-(3,4-dimethoxyphenyl)-6-phenyl-1,4-dihydropyrimidine-5-carboxylate ( <b>19</b> ).....                       | 21-22 |
| <sup>1</sup> H NMR and <sup>13</sup> C NMR Spectra of Ethyl 2,4-dimethyl-4H-pyrimido[1,2-a]pyrimidine-3-carboxylate ( <b>22</b> ).....                                            | 23-24 |
| <sup>1</sup> H NMR and <sup>13</sup> C NMR Spectra of Ethyl 2-methyl-4-phenethyl-4H-pyrimido[1,2-a]pyrimidine-3-carboxylate ( <b>23</b> ).....                                    | 25-26 |
| <sup>1</sup> H NMR and <sup>13</sup> C NMR Spectra of Ethyl 4-isopropyl-2-methyl-4H-pyrimido[1,2-a]pyrimidine-3-carboxylate ( <b>24</b> ).....                                    | 27-28 |
| <sup>1</sup> H and <sup>13</sup> C NMR Spectra of Ethyl 2,4-diphenyl-4H-pyrimido[1,2-a]pyrimidine-3-carboxylate ( <b>25</b> ).....                                                | 29-30 |
| <sup>1</sup> H and <sup>13</sup> C NMR Spectra of Ethyl 8-methyl-2,4-diphenyl-4H-pyrimido[1,2-a]pyrimidine-3-carboxylate ( <b>27</b> ).....                                       | 31-32 |
| <sup>1</sup> H and <sup>13</sup> C NMR Spectra of Ethyl 8-(1H-indol-2-yl)-2,4-diphenyl-4H-pyrimido[1,2-a]pyrimidine-3-carboxylate ( <b>30</b> ).....                              | 33-34 |
| <sup>1</sup> H and <sup>13</sup> C NMR Spectra of Ethyl 8-(benzofuran-2-yl)-2,4-diphenyl-4H-pyrimido[1,2-a]pyrimidine-3-carboxylate ( <b>31</b> ).....                            | 35-36 |
| <sup>1</sup> H and <sup>13</sup> C NMR Spectra of Ethyl 2,4,8-triphenyl-4H-pyrimido[1,2-a]pyrimidine-3-carboxylate ( <b>38a</b> ).....                                            | 37-38 |
| <sup>1</sup> H and <sup>13</sup> C NMR Spectra of Ethyl 4-(3,4-dimethoxyphenyl)-2,8-diphenyl-4H-pyrimido[1,2-a]pyrimidine-3-carboxylate ( <b>38b</b> ).....                       | 39-40 |
| <sup>1</sup> H and <sup>13</sup> C NMR Spectra of Ethyl 8-(4-methoxyphenyl)-2,4-diphenyl-4H-pyrimido[1,2-a]pyrimidine-3-carboxylate ( <b>38c</b> ).....                           | 41-42 |
| <sup>1</sup> H and <sup>13</sup> C NMR Spectra of Ethyl 2,4-diphenyl-8-(4-(trifluoromethyl)phenyl)-4H-pyrimido[1,2-a]pyrimidine-3-carboxylate ( <b>38d</b> ).....                 | 43-44 |
| <sup>1</sup> H and <sup>13</sup> C NMR Spectra of Ethyl 4-amino-6,8-dimethyl-2-morpholino-6H-pyrimido[1,2-a][1,3,5]triazine-7-carboxylate ( <b>40</b> ).....                      | 45-46 |
| <sup>1</sup> H and <sup>13</sup> C NMR Spectra of Ethyl 4-amino-8-methyl-2-morpholino-6-phenethyl-6H-pyrimido[1,2-a][1,3,5]triazine-7-carboxylate ( <b>41</b> ).....              | 47-48 |
| <sup>1</sup> H and <sup>13</sup> C NMR Spectra of Ethyl 4-amino-6-isopropyl-8-methyl-2-morpholino-6H-pyrimido[1,2-a][1,3,5]triazine-7-carboxylate ( <b>42</b> ).....              | 49-50 |
| <sup>1</sup> H and <sup>13</sup> C NMR Spectra of Ethyl 4-amino-2-morpholino-6,8-diphenyl-6H-pyrimido[1,2-a][1,3,5]triazine-7-carboxylate ( <b>43</b> ).....                      | 51-52 |

|                                                                                                                                                                                                            |       |
|------------------------------------------------------------------------------------------------------------------------------------------------------------------------------------------------------------|-------|
| <sup>1</sup> H and <sup>13</sup> C NMR Spectra of Ethyl 6,8-dimethyl-4-oxo-3,4,6,9-tetrahydropyrimido[2,1-c][1,2,4,6]thiatiazine-7-carboxylate 2,2-dioxide ( <b>44</b> ) .....                             | 53-54 |
| <sup>1</sup> H and <sup>13</sup> C NMR Spectra of Ethyl 4-oxo-6,8-diphenyl-3,4,6,9-tetrahydropyrimido[2,1-c][1,2,4,6]thiatiazine-7-carboxylate 2,2-dioxide ( <b>45</b> ) .....                             | 55-56 |
| <sup>1</sup> H and <sup>13</sup> C NMR Spectra of Diethyl 4,6-bis(4-chlorophenyl)-2,8-dimethyl-4,6-dihydro-1H-pyrimido[1,2-a]pyrimidine-3,7-dicarboxylate ( <b>46</b> ) .....                              | 57-58 |
| <sup>1</sup> H and <sup>13</sup> C NMR Spectra of Ethyl 2-(4-morpholinobenzylidene)-3-oxobutanoate ( <b>48d</b> ) .....                                                                                    | 59-60 |
| <sup>1</sup> H and <sup>13</sup> C NMR Spectra of Ethyl 2-(6-chloro-4-methylquinazolin-2-ylamino)-4-(4-chlorophenyl)-6-methyl-1,4-dihydropyrimidine-5-carboxylate ( <b>49a</b> ) .....                     | 61-62 |
| <sup>1</sup> H and <sup>13</sup> C NMR Spectra of Ethyl 4-(4-chlorophenyl)-2-(4,6-dimethylquinazolin-2-ylamino)-6-methyl-1,4-dihydropyrimidine-5-carboxylate ( <b>49b</b> ) .....                          | 63-64 |
| <sup>1</sup> H and <sup>13</sup> C NMR Spectra of Ethyl 4-(4-chlorophenyl)-2-(6-fluoro-4-methylquinazolin-2-ylamino)-6-methyl-1,4-dihydropyrimidine-5-carboxylate ( <b>49c</b> ) .....                     | 65-66 |
| <sup>1</sup> H and <sup>13</sup> C NMR Spectra of Ethyl 4-(4-dimethylaminophenyl)-2-(6-fluoro-4-methylquinazolin-2-ylamino)-6-methyl-1,4-dihydropyrimidine-5-carboxylate ( <b>49d</b> ) .....              | 67-68 |
| <sup>1</sup> H and <sup>13</sup> C NMR Spectra of Ethyl 2-(4,6-dimethylquinazolin-2-ylamino)-6-methyl-4-(3-nitrophenyl)-1,4-dihydropyrimidine-5-carboxylate ( <b>49e</b> ) .....                           | 69-70 |
| <sup>1</sup> H and <sup>13</sup> C NMR Spectra of Ethyl 4-(4-chlorophenyl)-6-methyl-2-(8-methyl-[1,3]dioxolo[4,5-g]quinazolin-6-ylamino)-1,4-dihydropyrimidine-5-carboxylate ( <b>49f</b> ) .....          | 71-72 |
| <sup>1</sup> H and <sup>13</sup> C NMR Spectra of Ethyl 4-(4-bromophenyl)-6-methyl-2-(8-methyl-[1,3]dioxolo[4,5-g]quinazolin-6-ylamino)-1,4-dihydropyrimidine-5-carboxylate ( <b>49g</b> ) .....           | 73-74 |
| <sup>1</sup> H and <sup>13</sup> C NMR Spectra of Ethyl 6-methyl-2-(8-methyl-[1,3]dioxolo[4,5-g]quinazolin-6-ylamino)-4-(4-morpholinophenyl)-1,4-dihydropyrimidine-5-carboxylate ( <b>49h</b> ) .....      | 75-76 |
| <sup>1</sup> H and <sup>13</sup> C NMR Spectra of Ethyl 4-(4-(dimethylamino)phenyl)-6-methyl-2-(8-methyl-[1,3]dioxolo[4,5-g]quinazolin-6-ylamino)-1,4-dihydropyrimidine-5-carboxylate ( <b>49i</b> ) ..... | 77-78 |

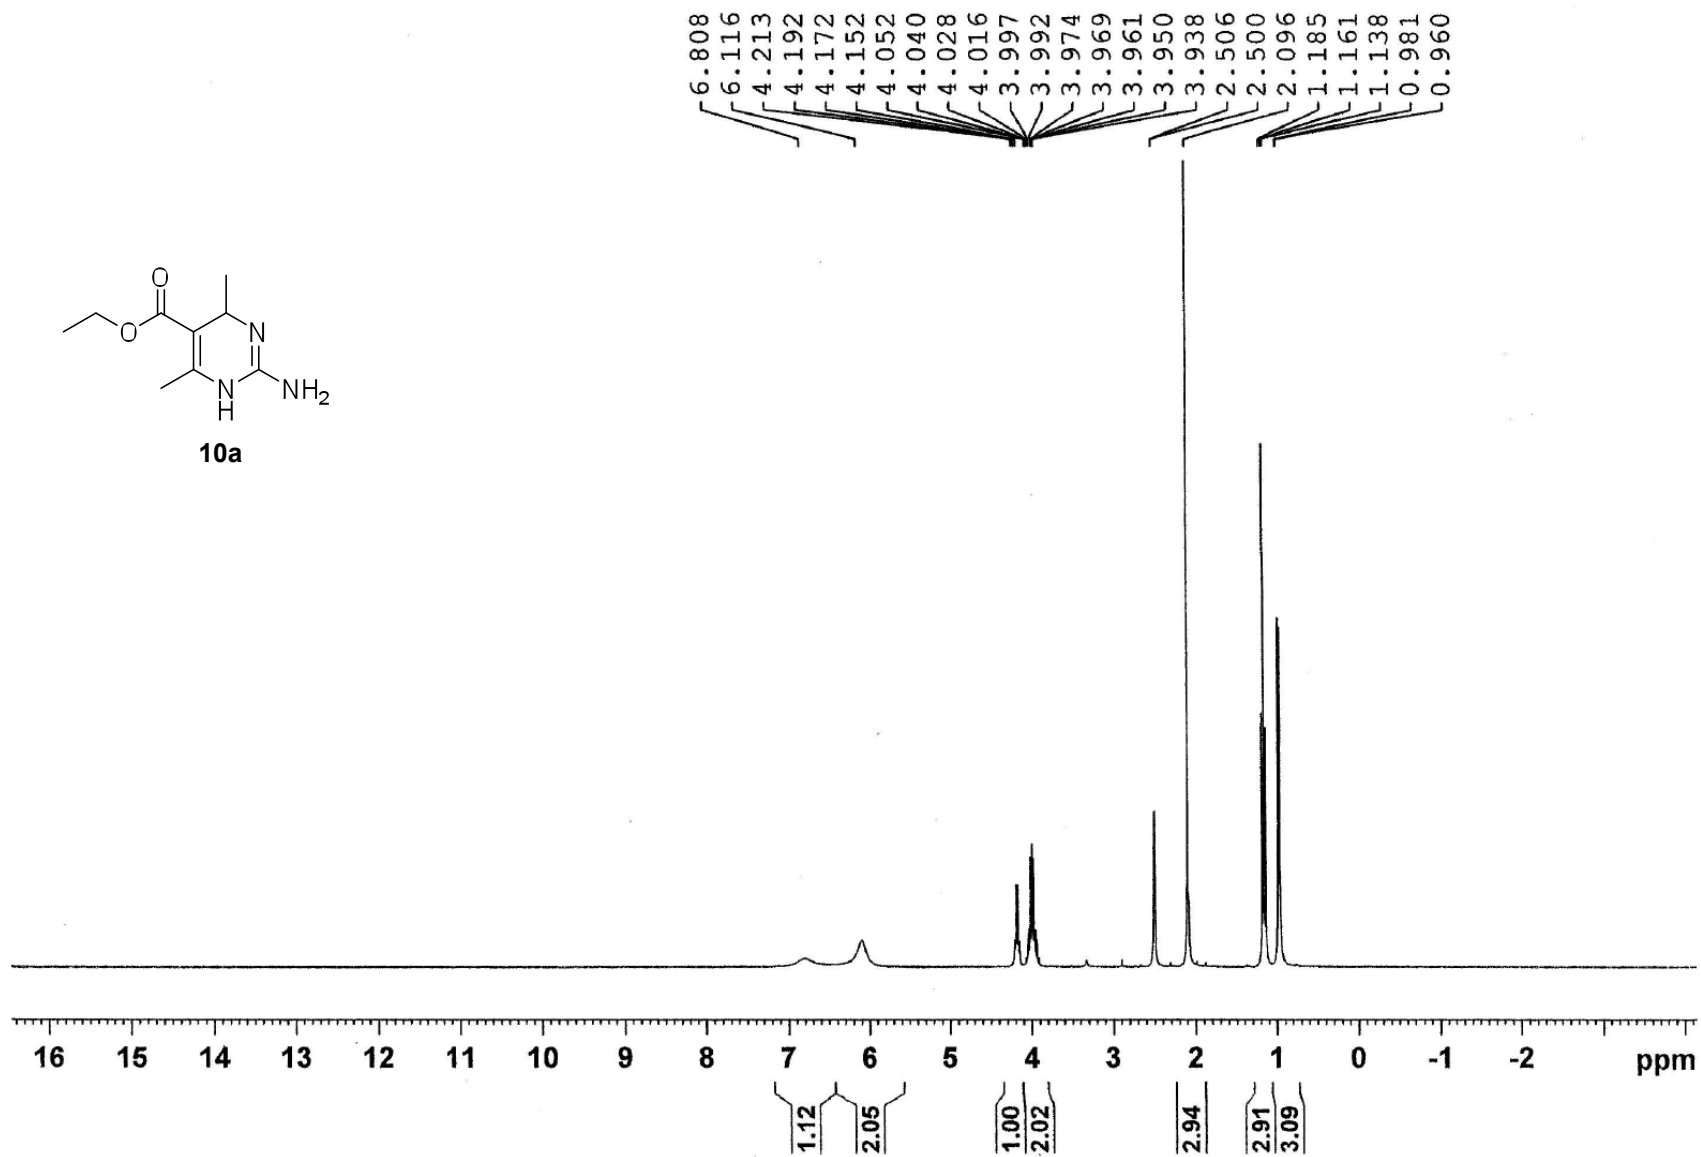

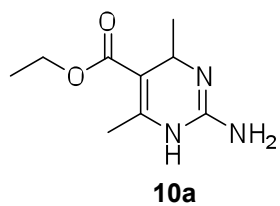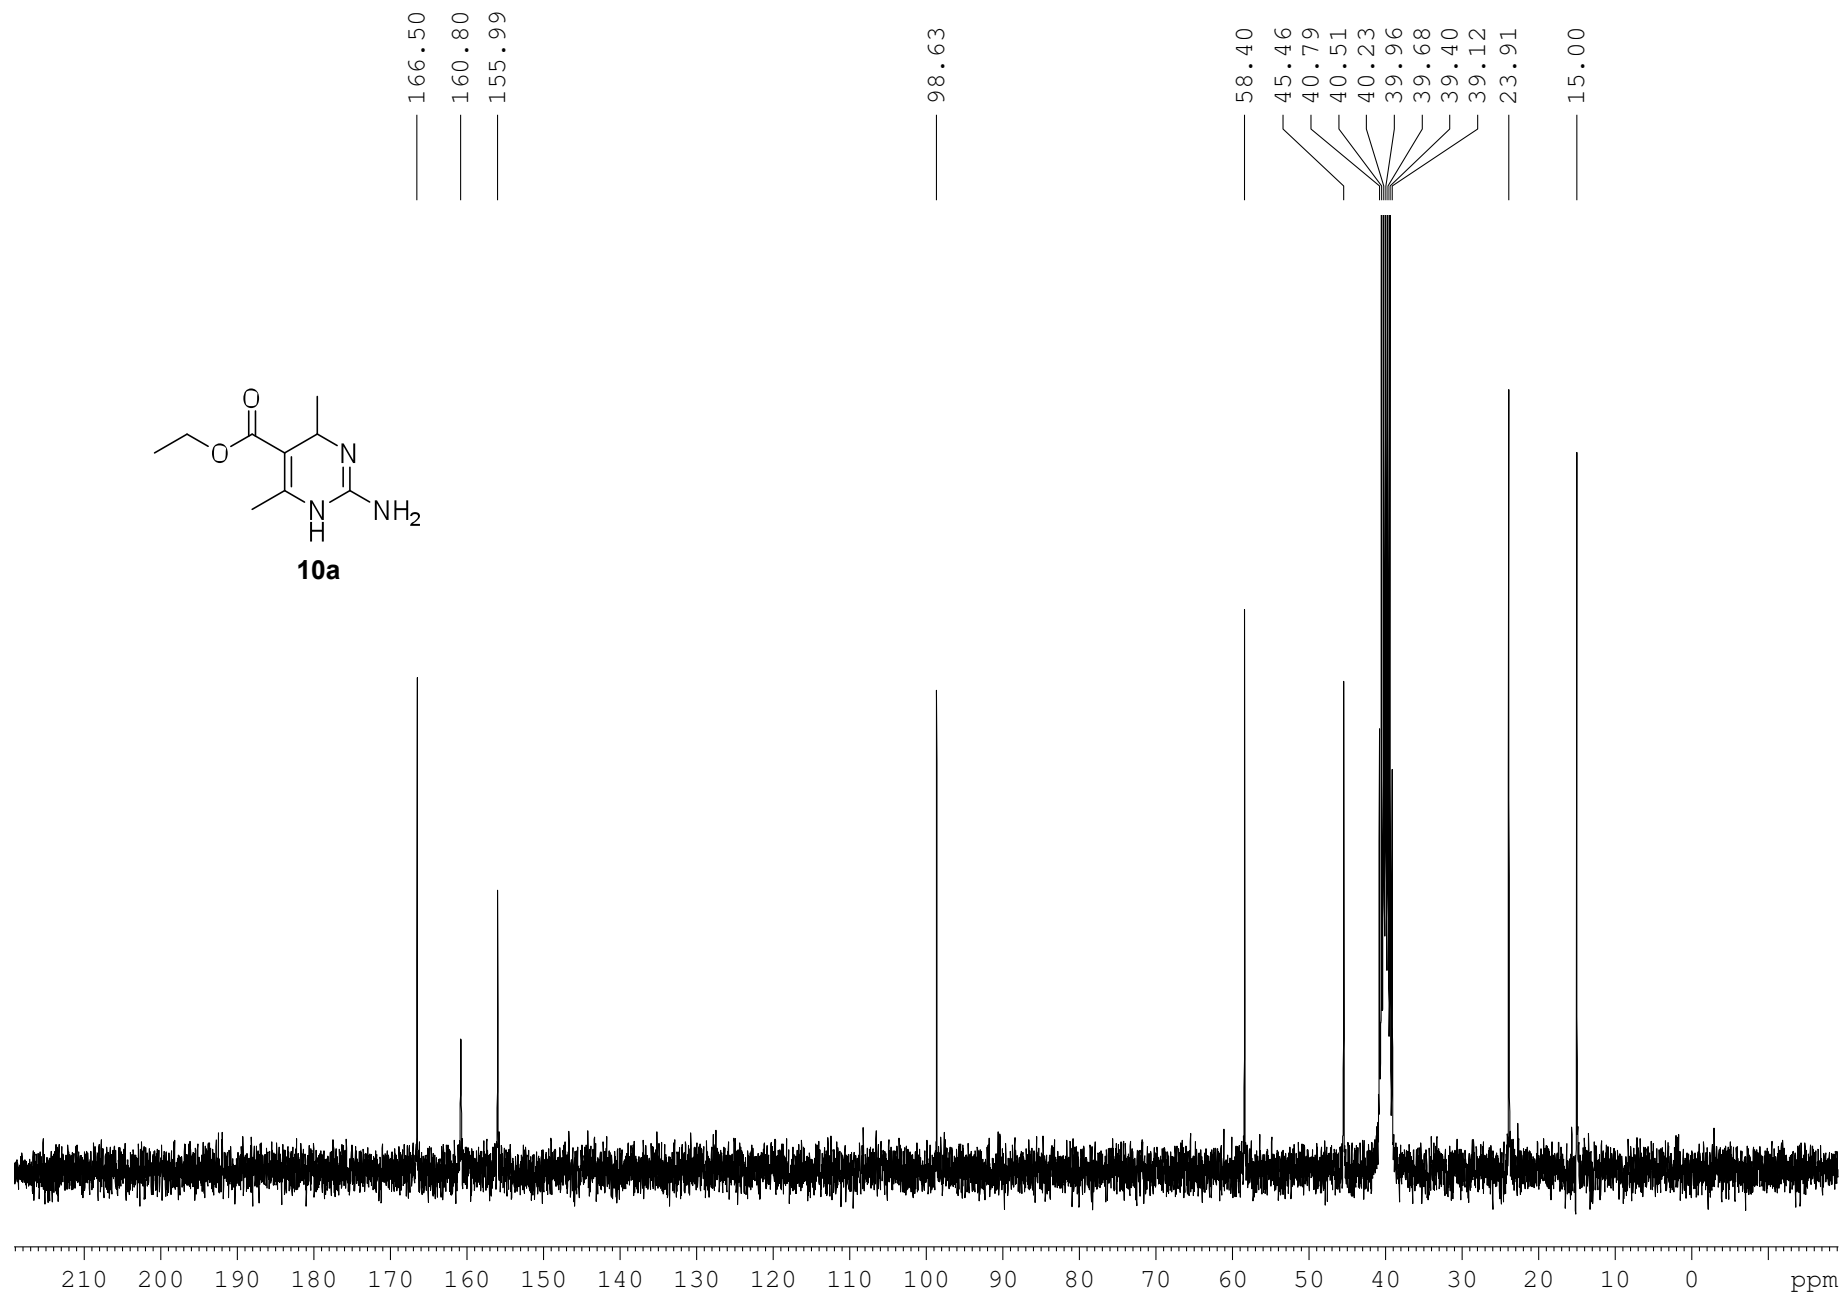

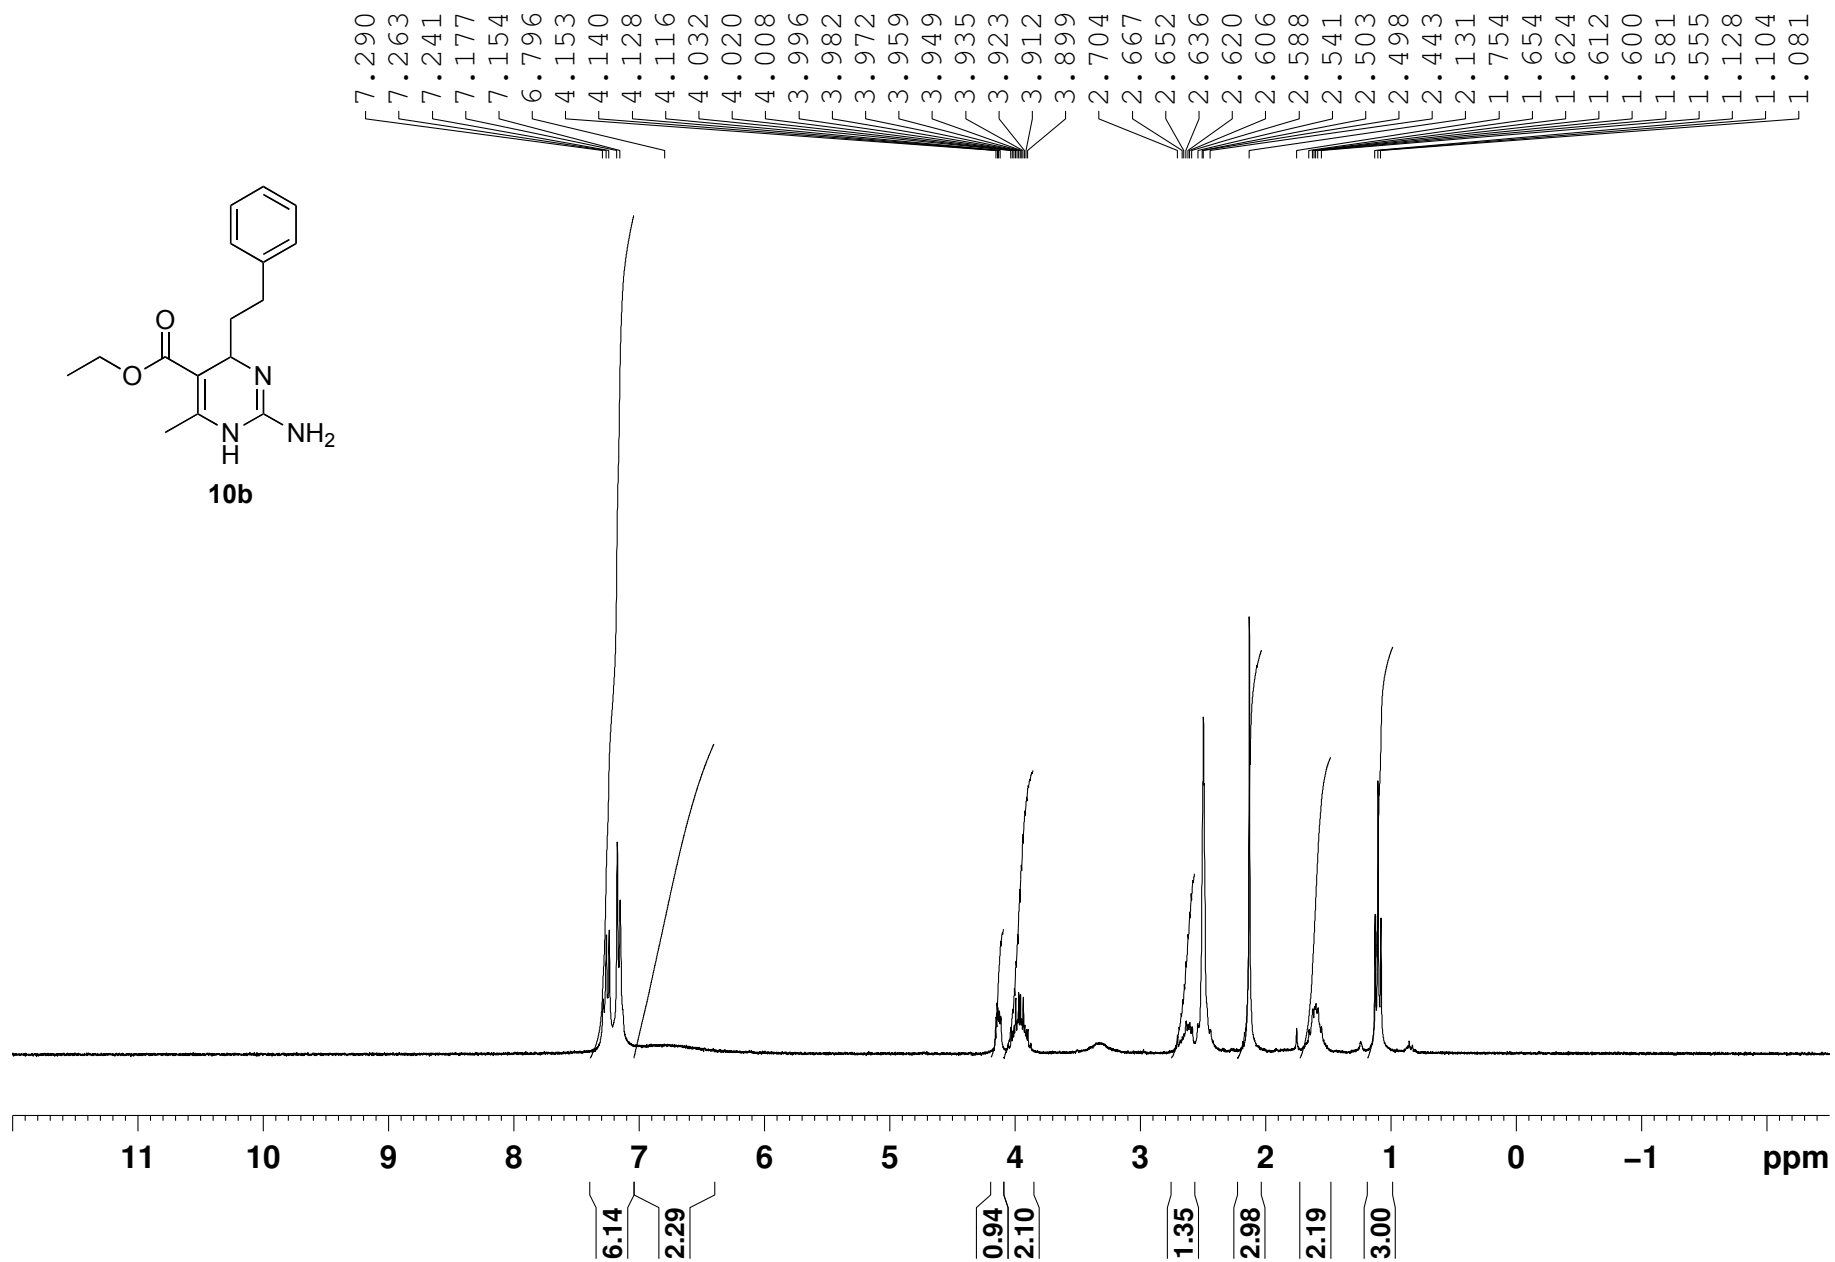

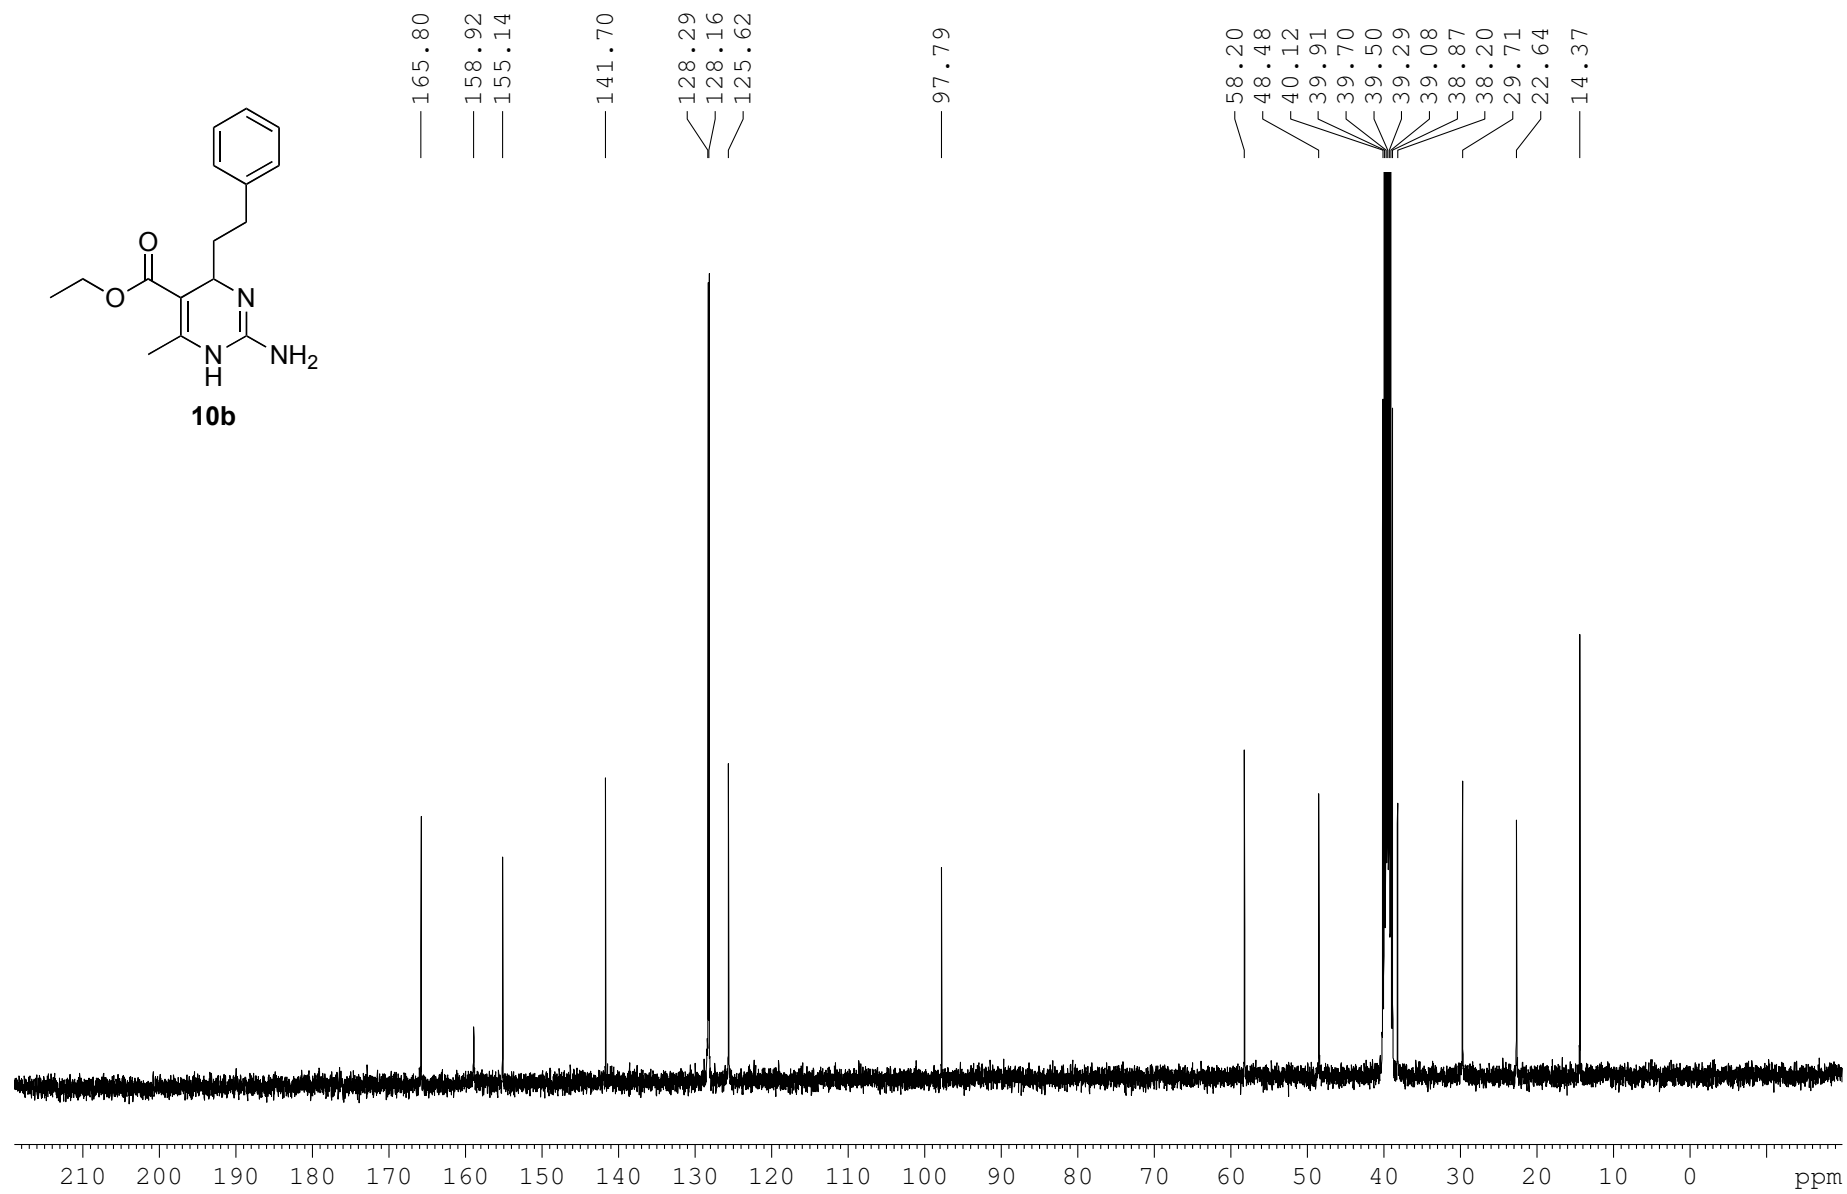

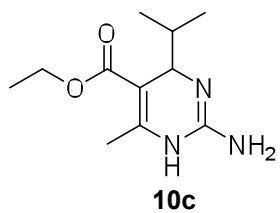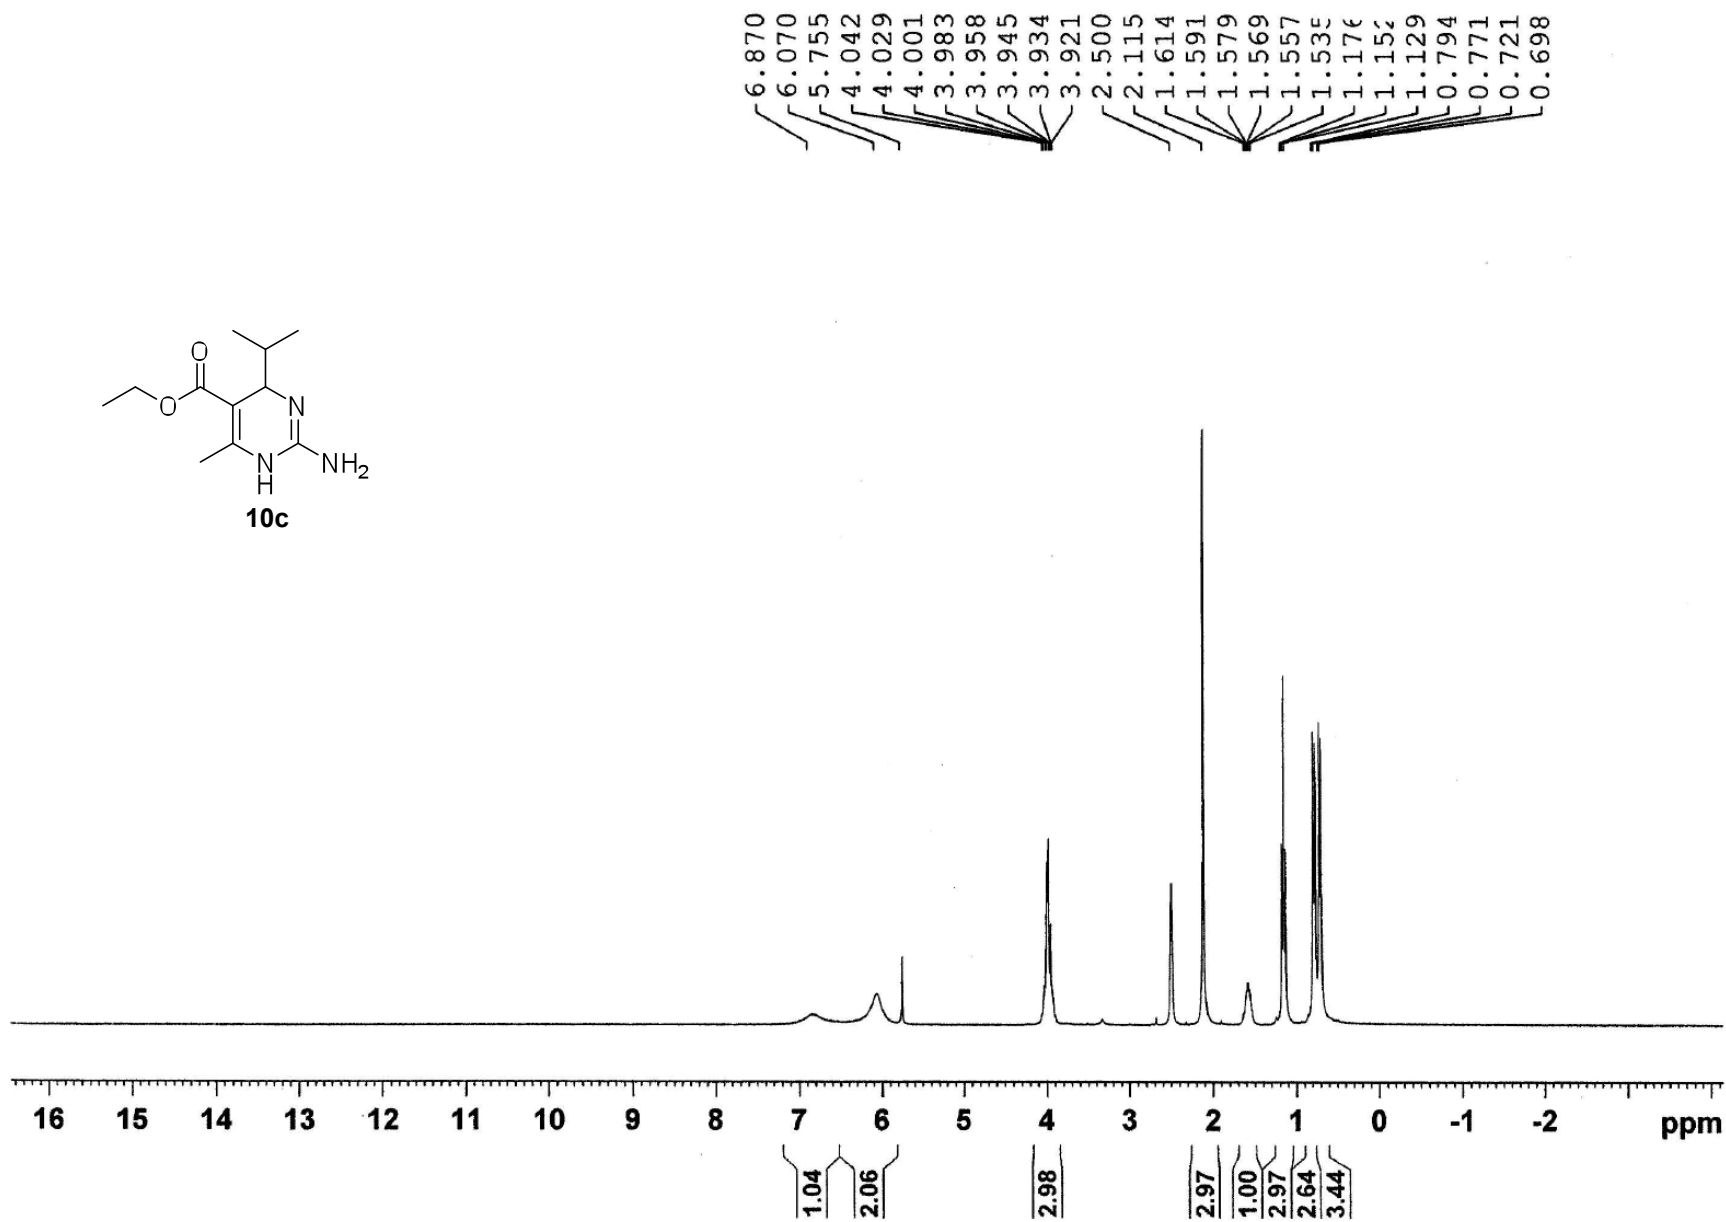



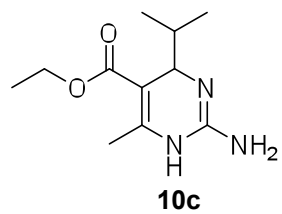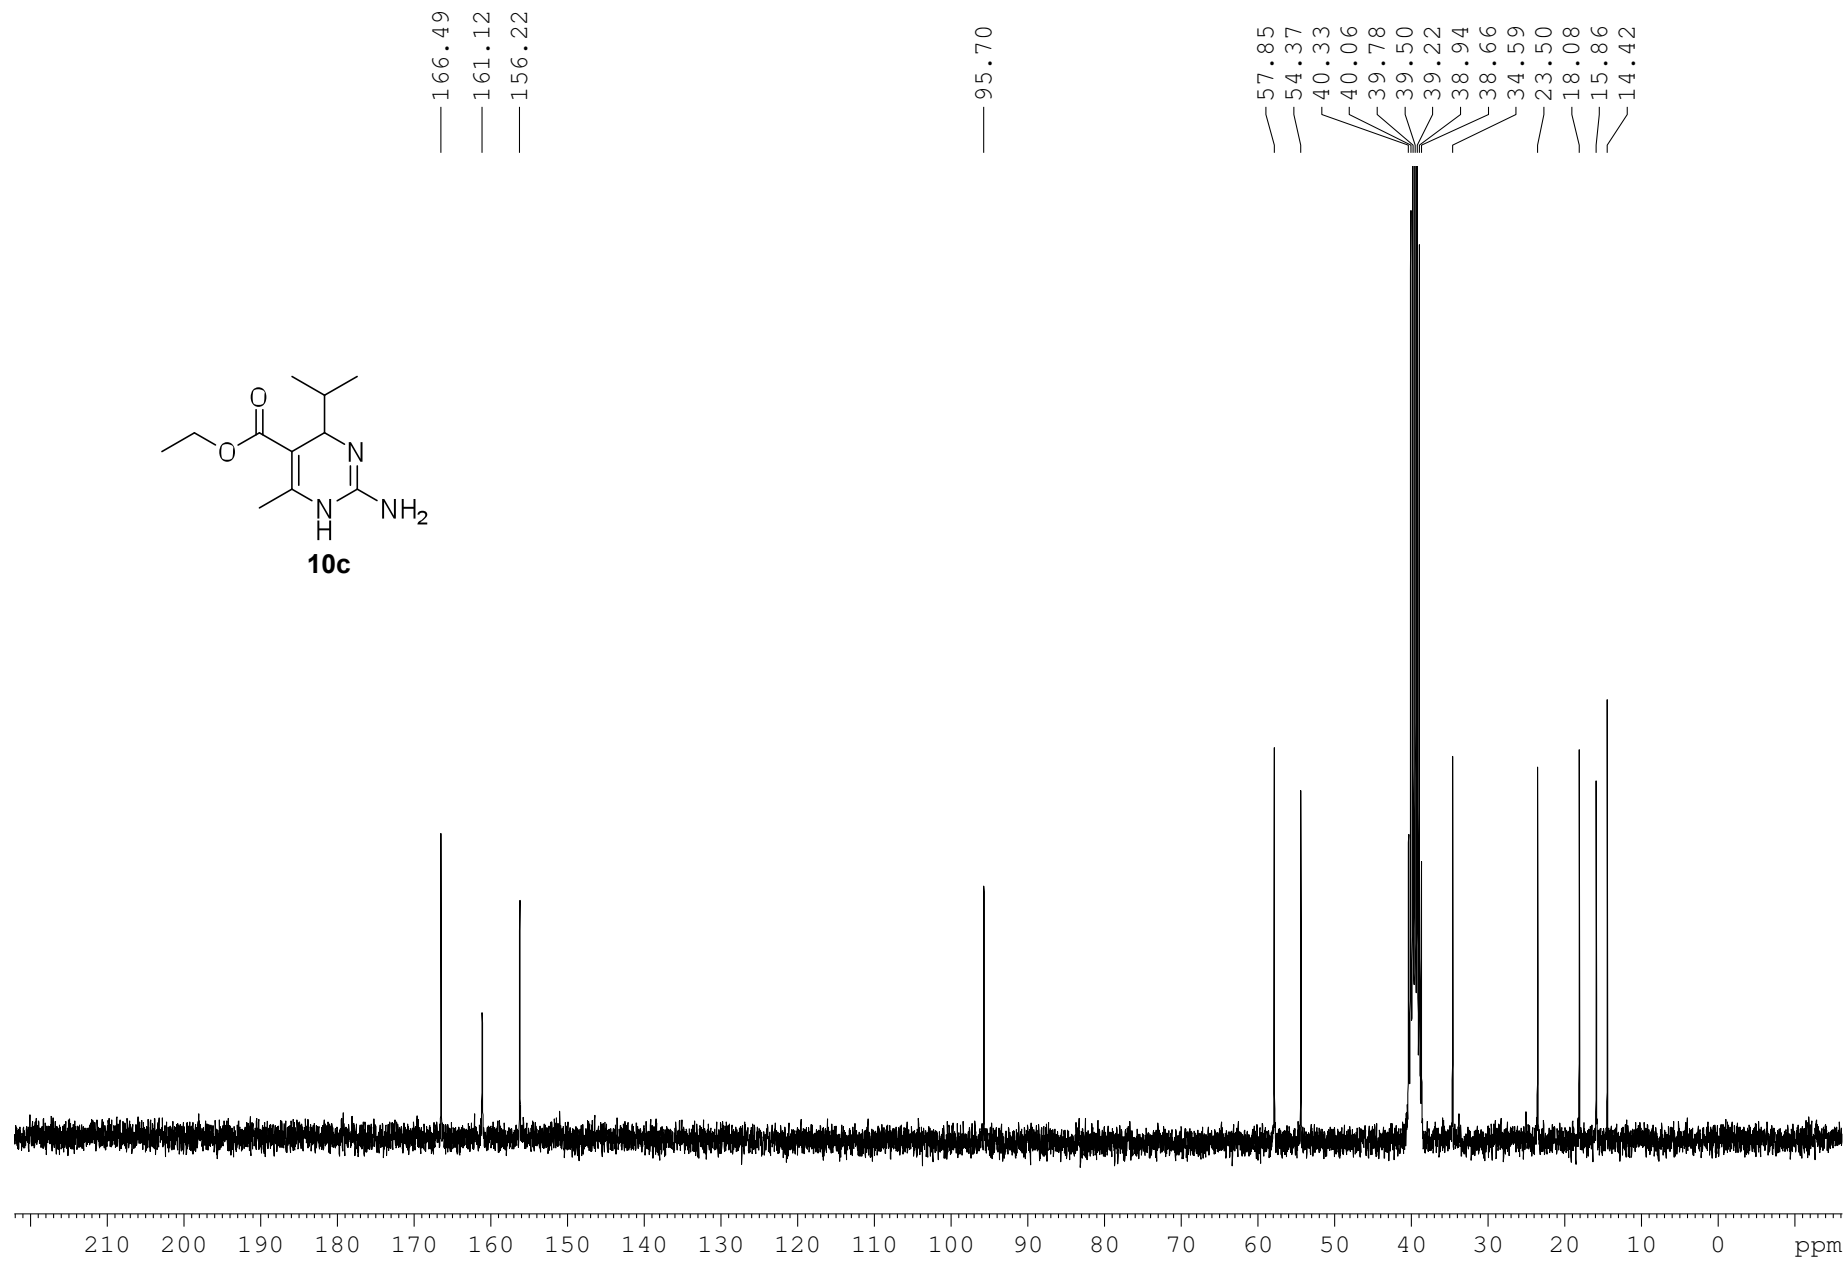

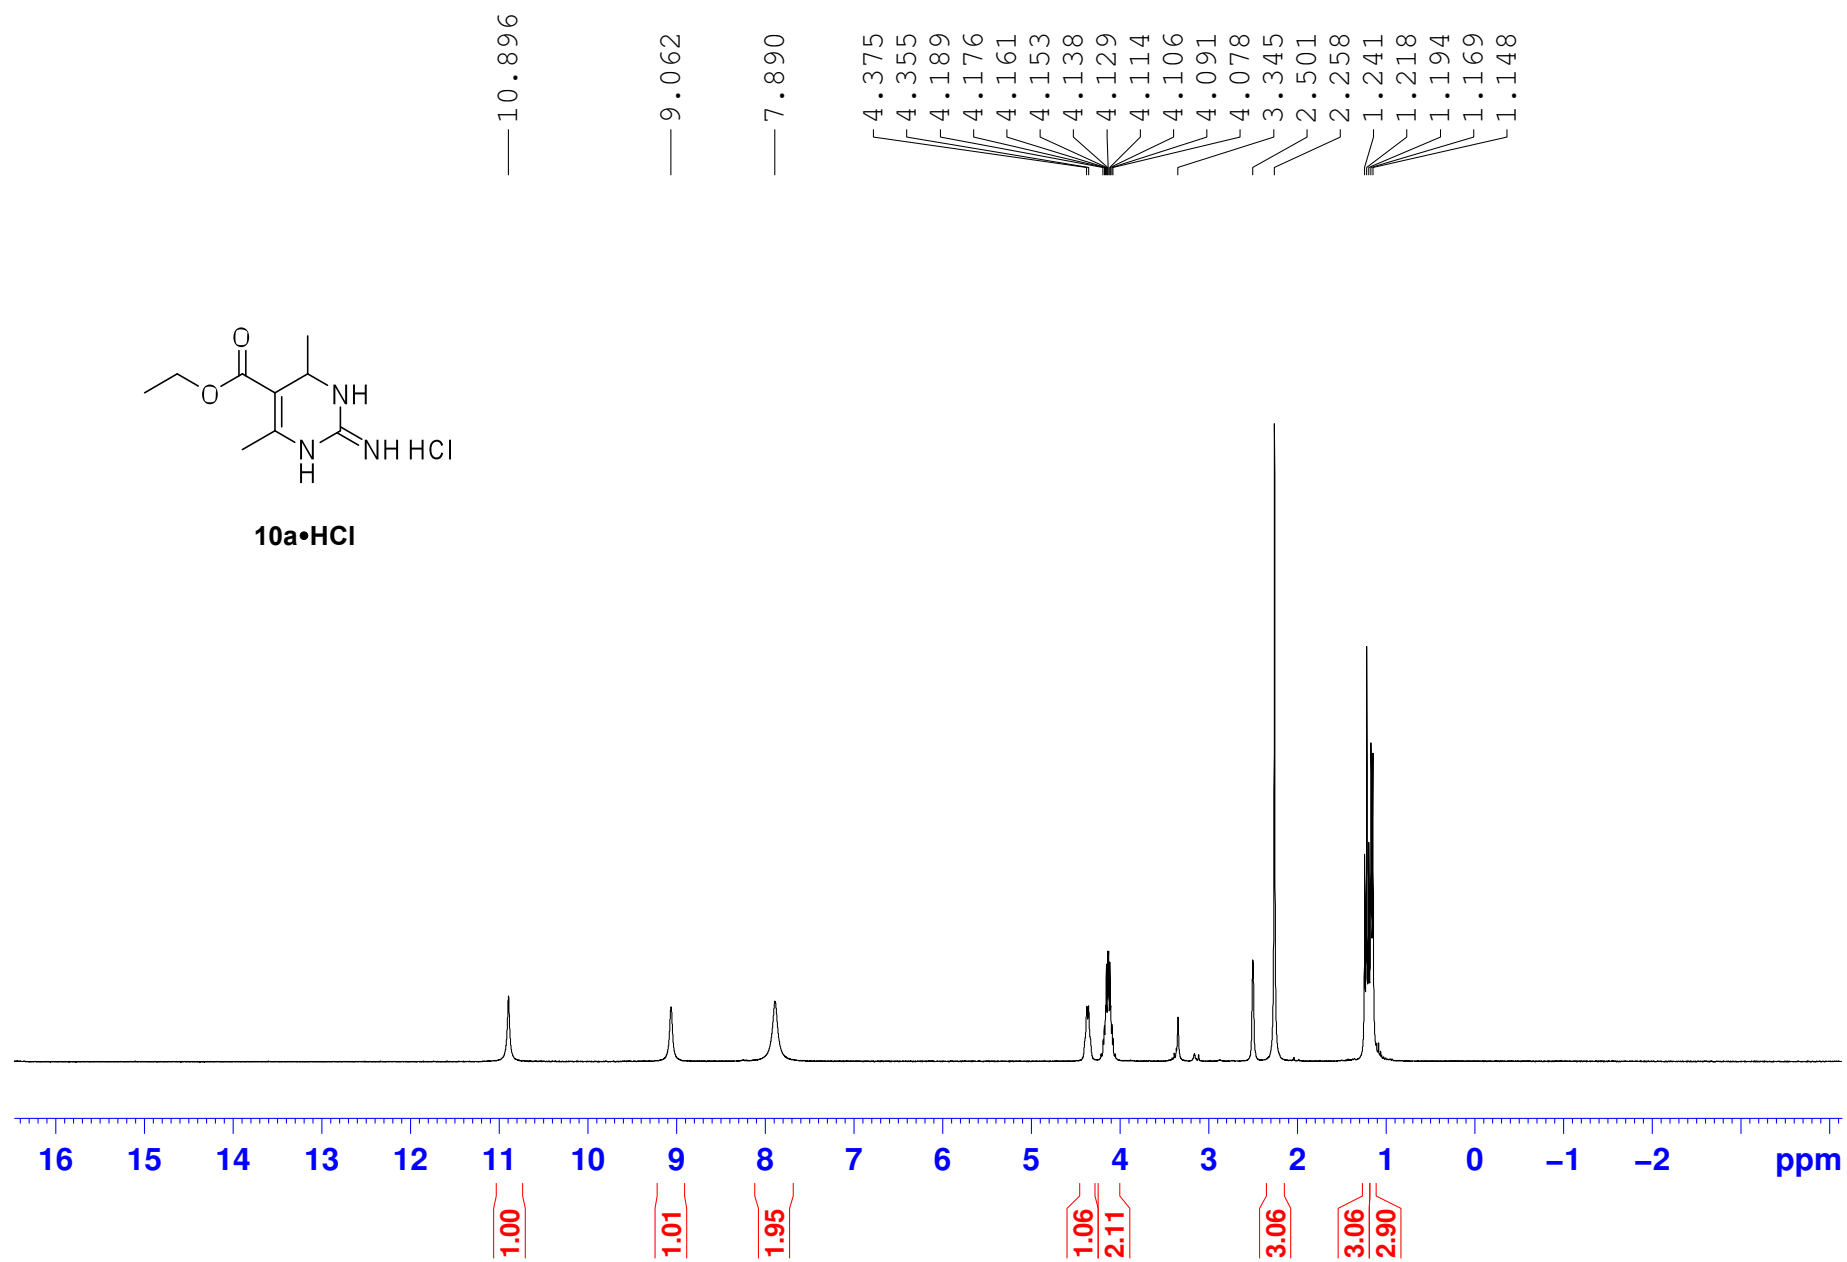

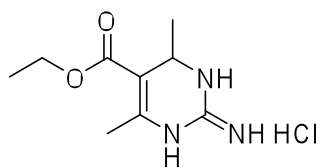**10a•HCl**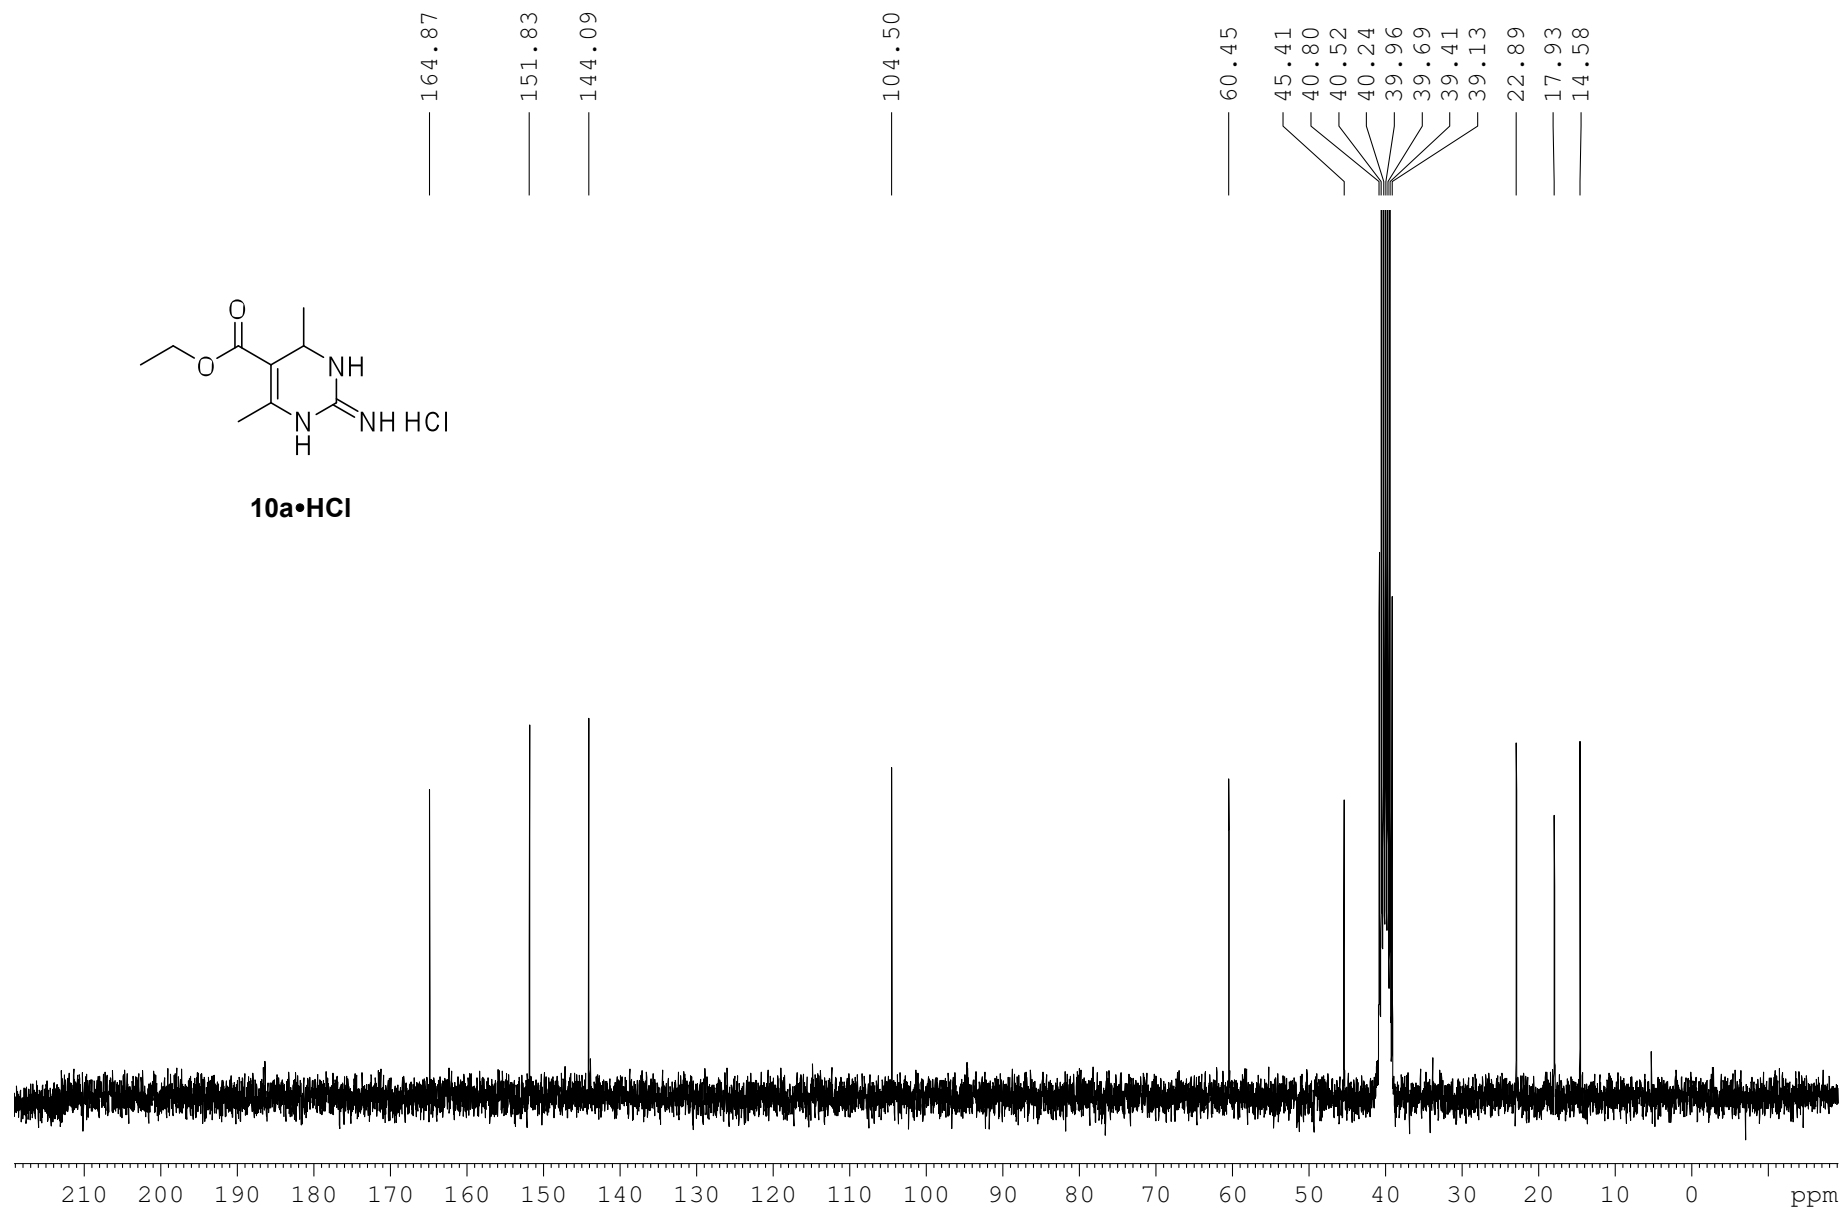

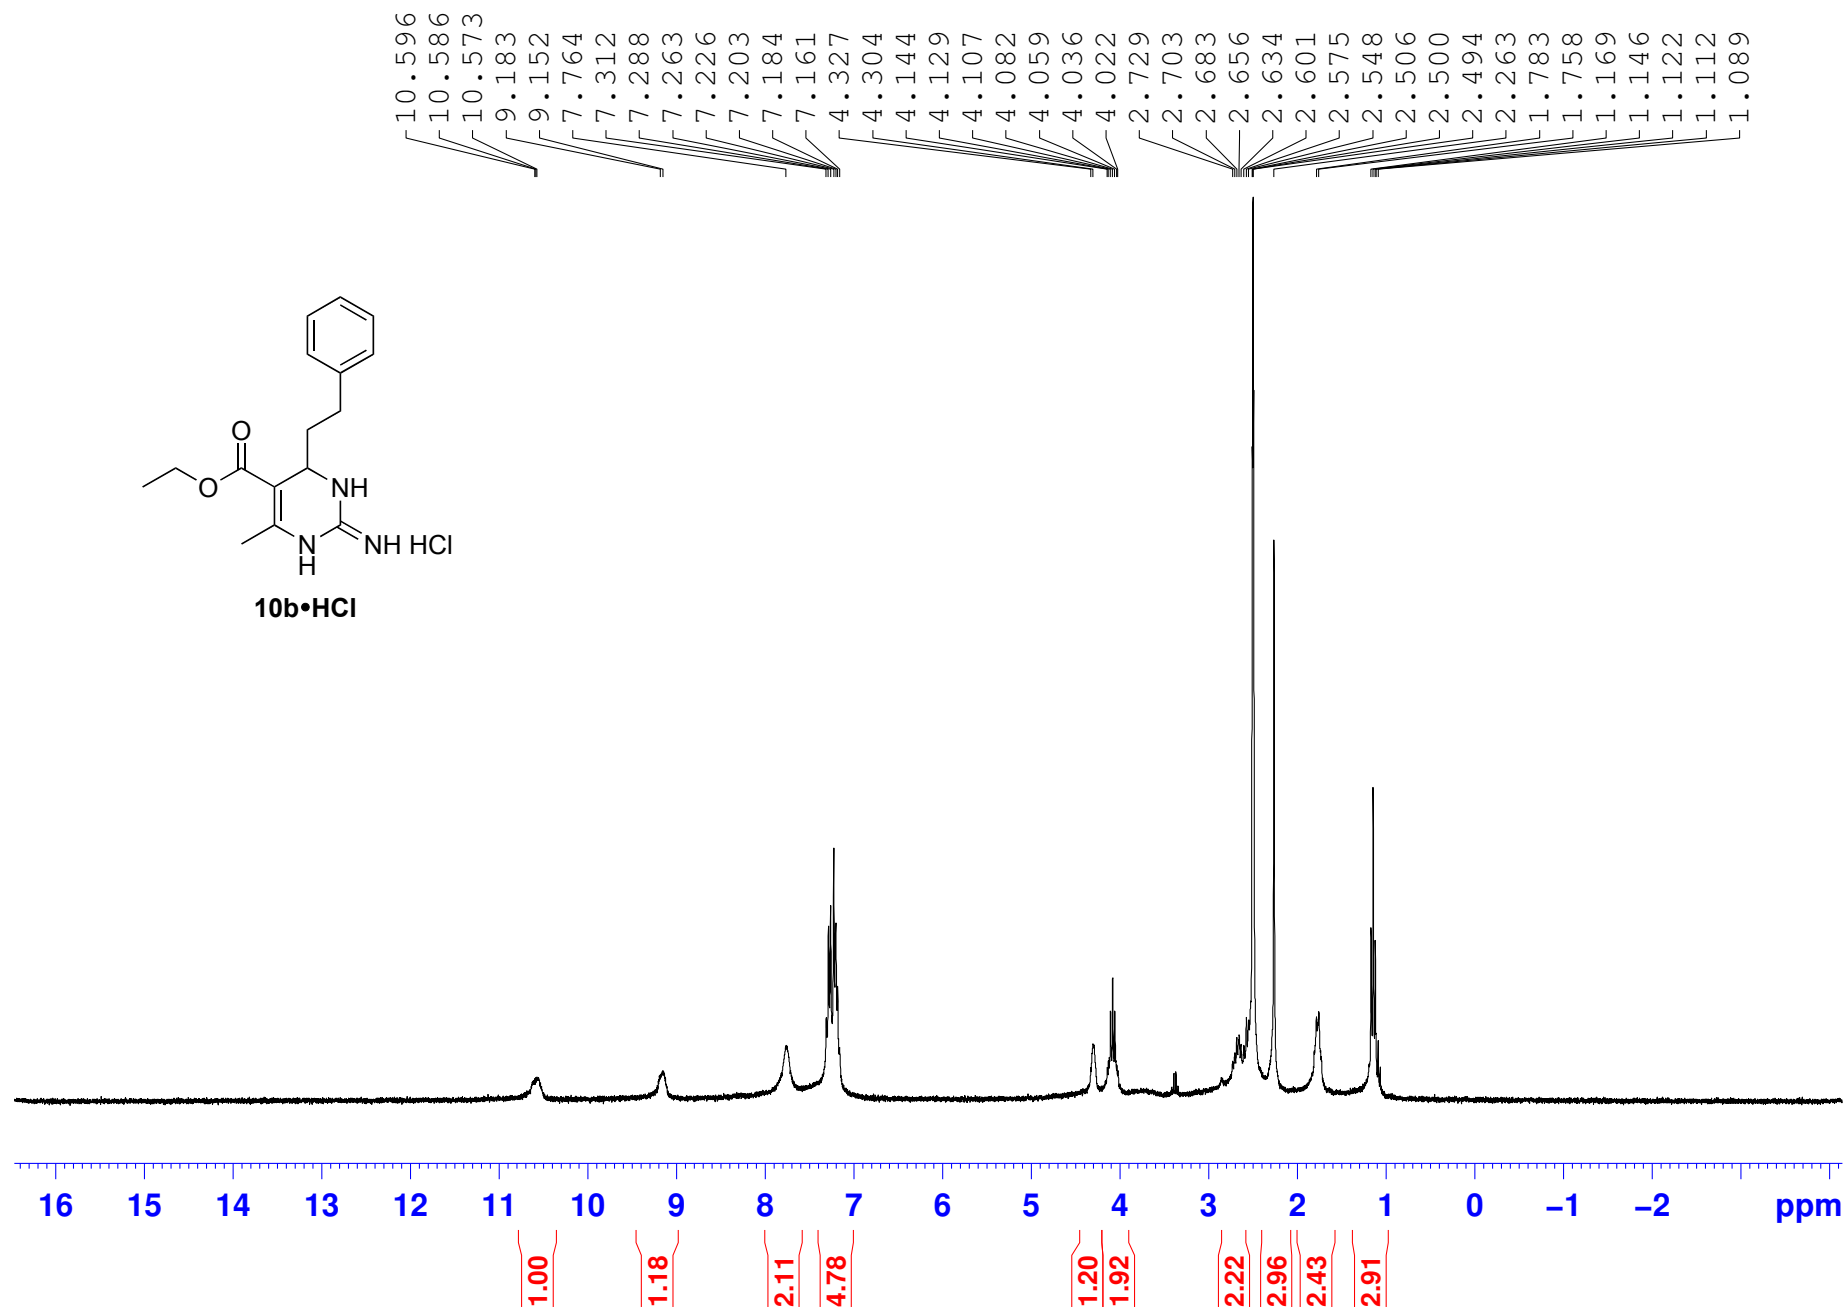

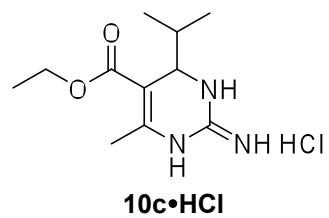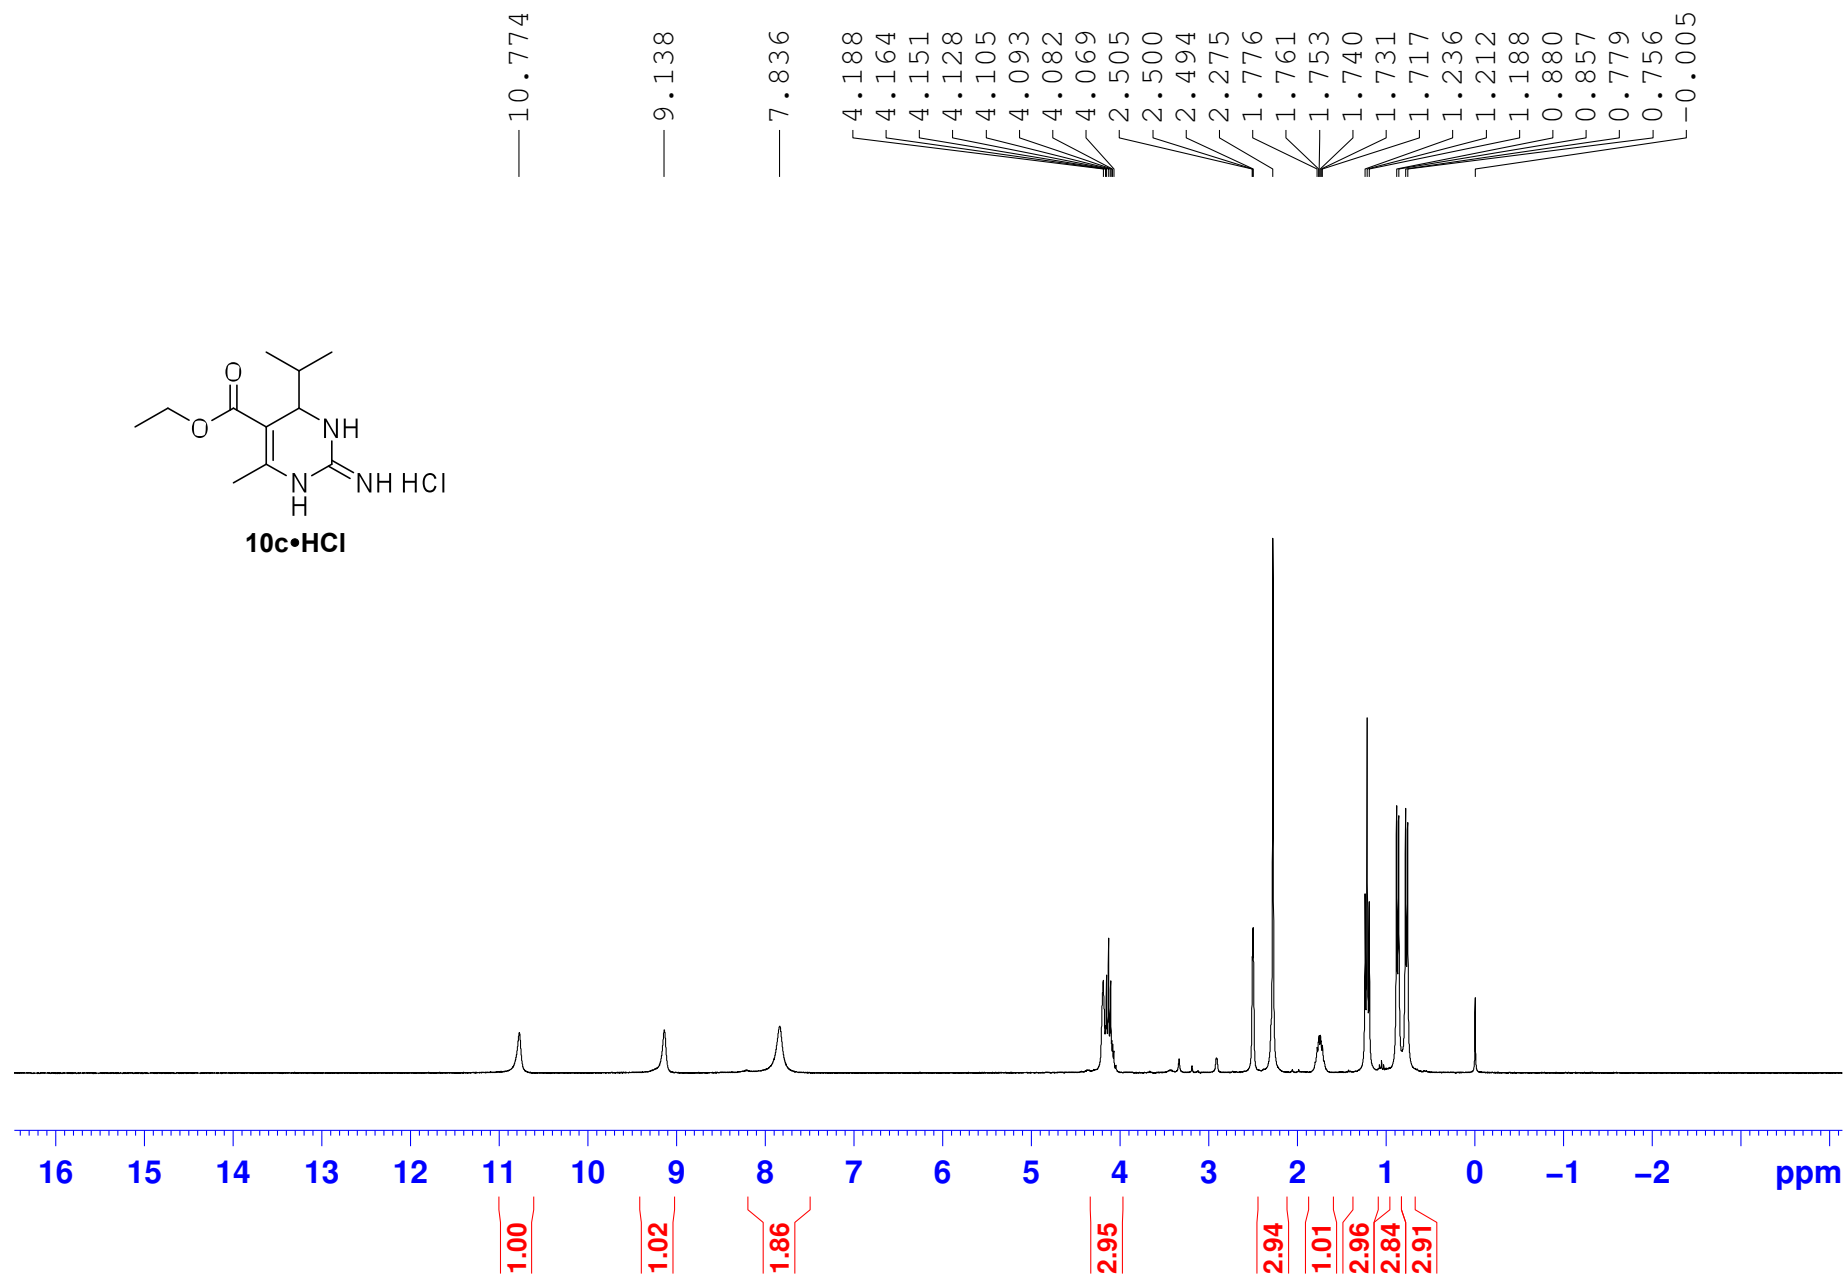

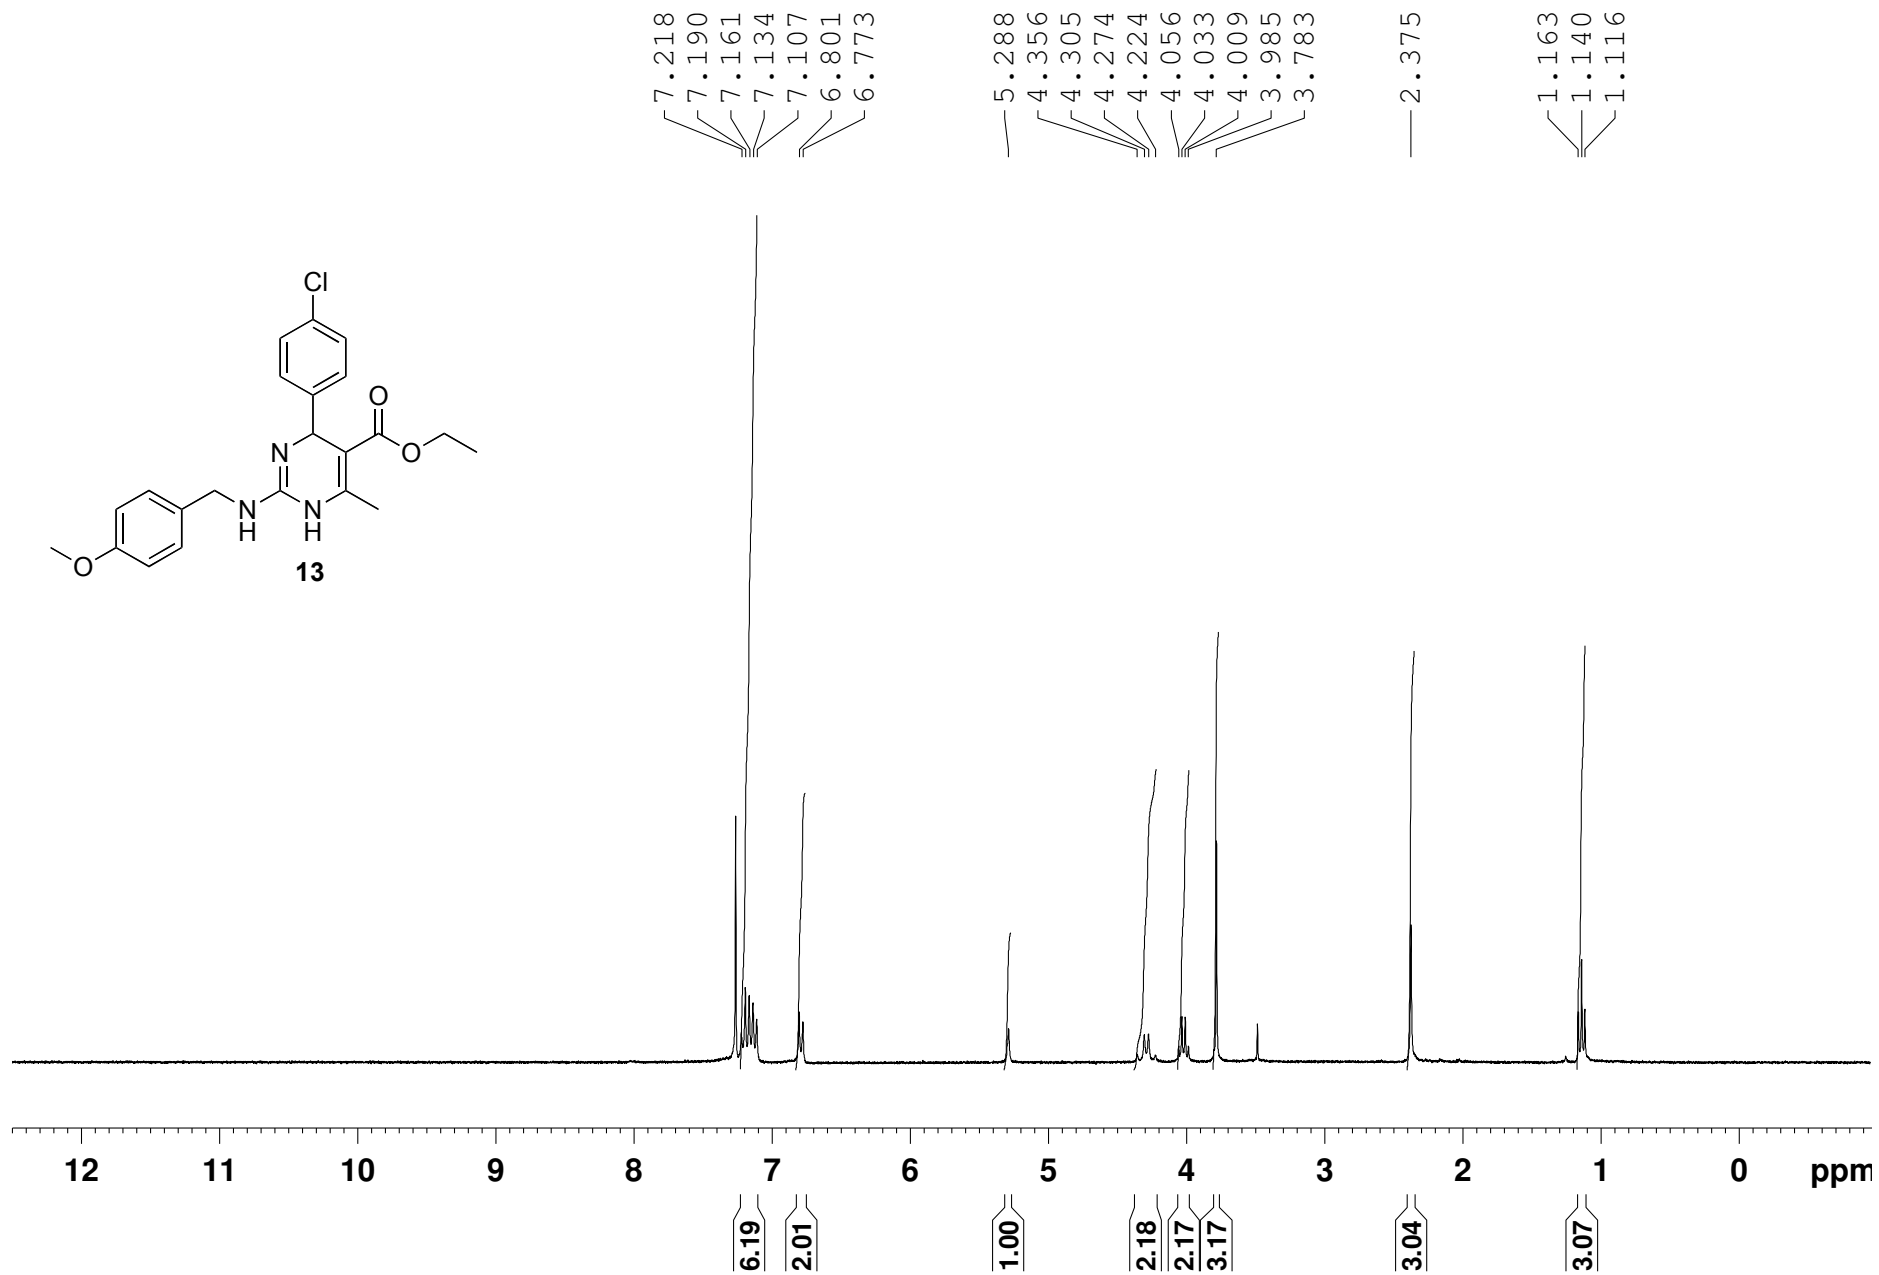

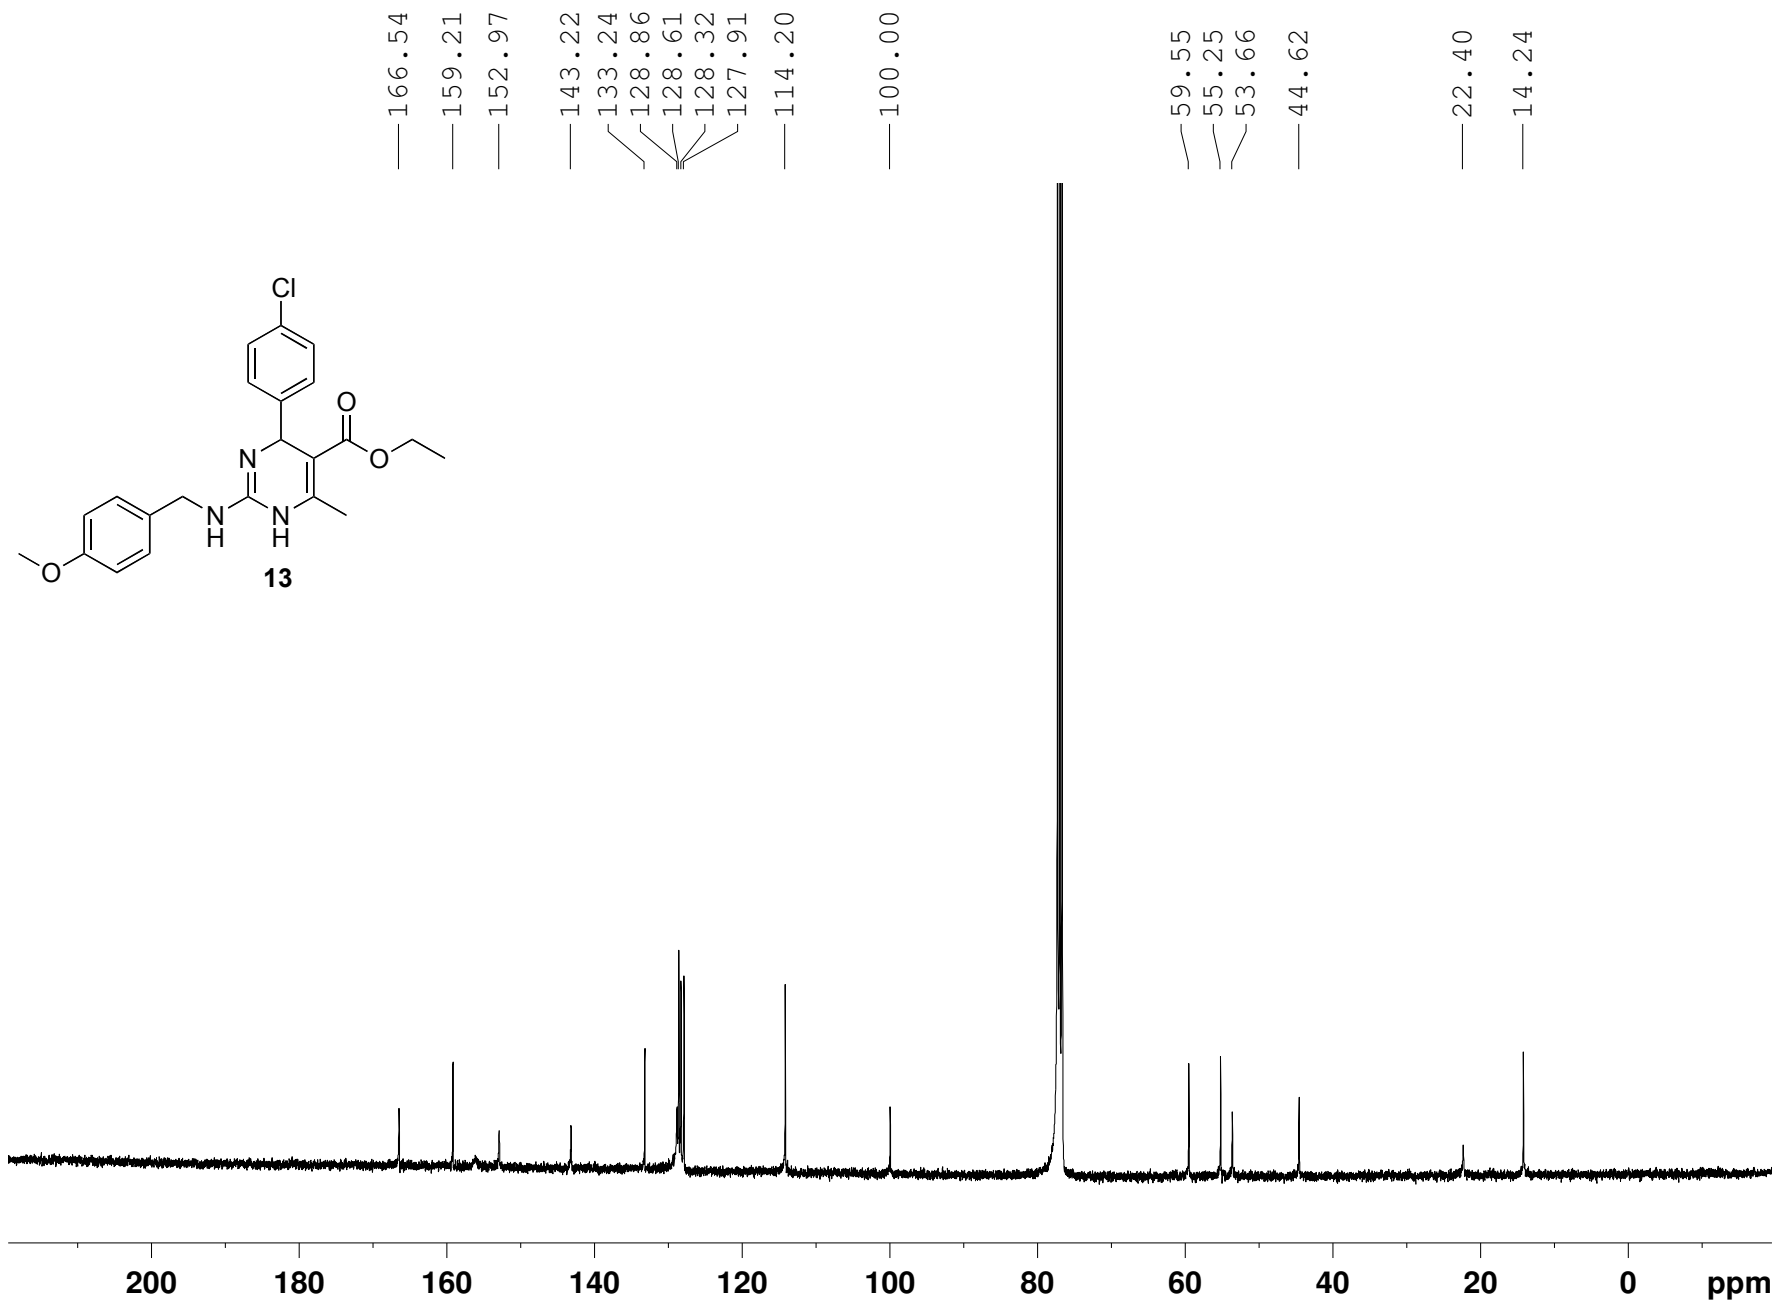

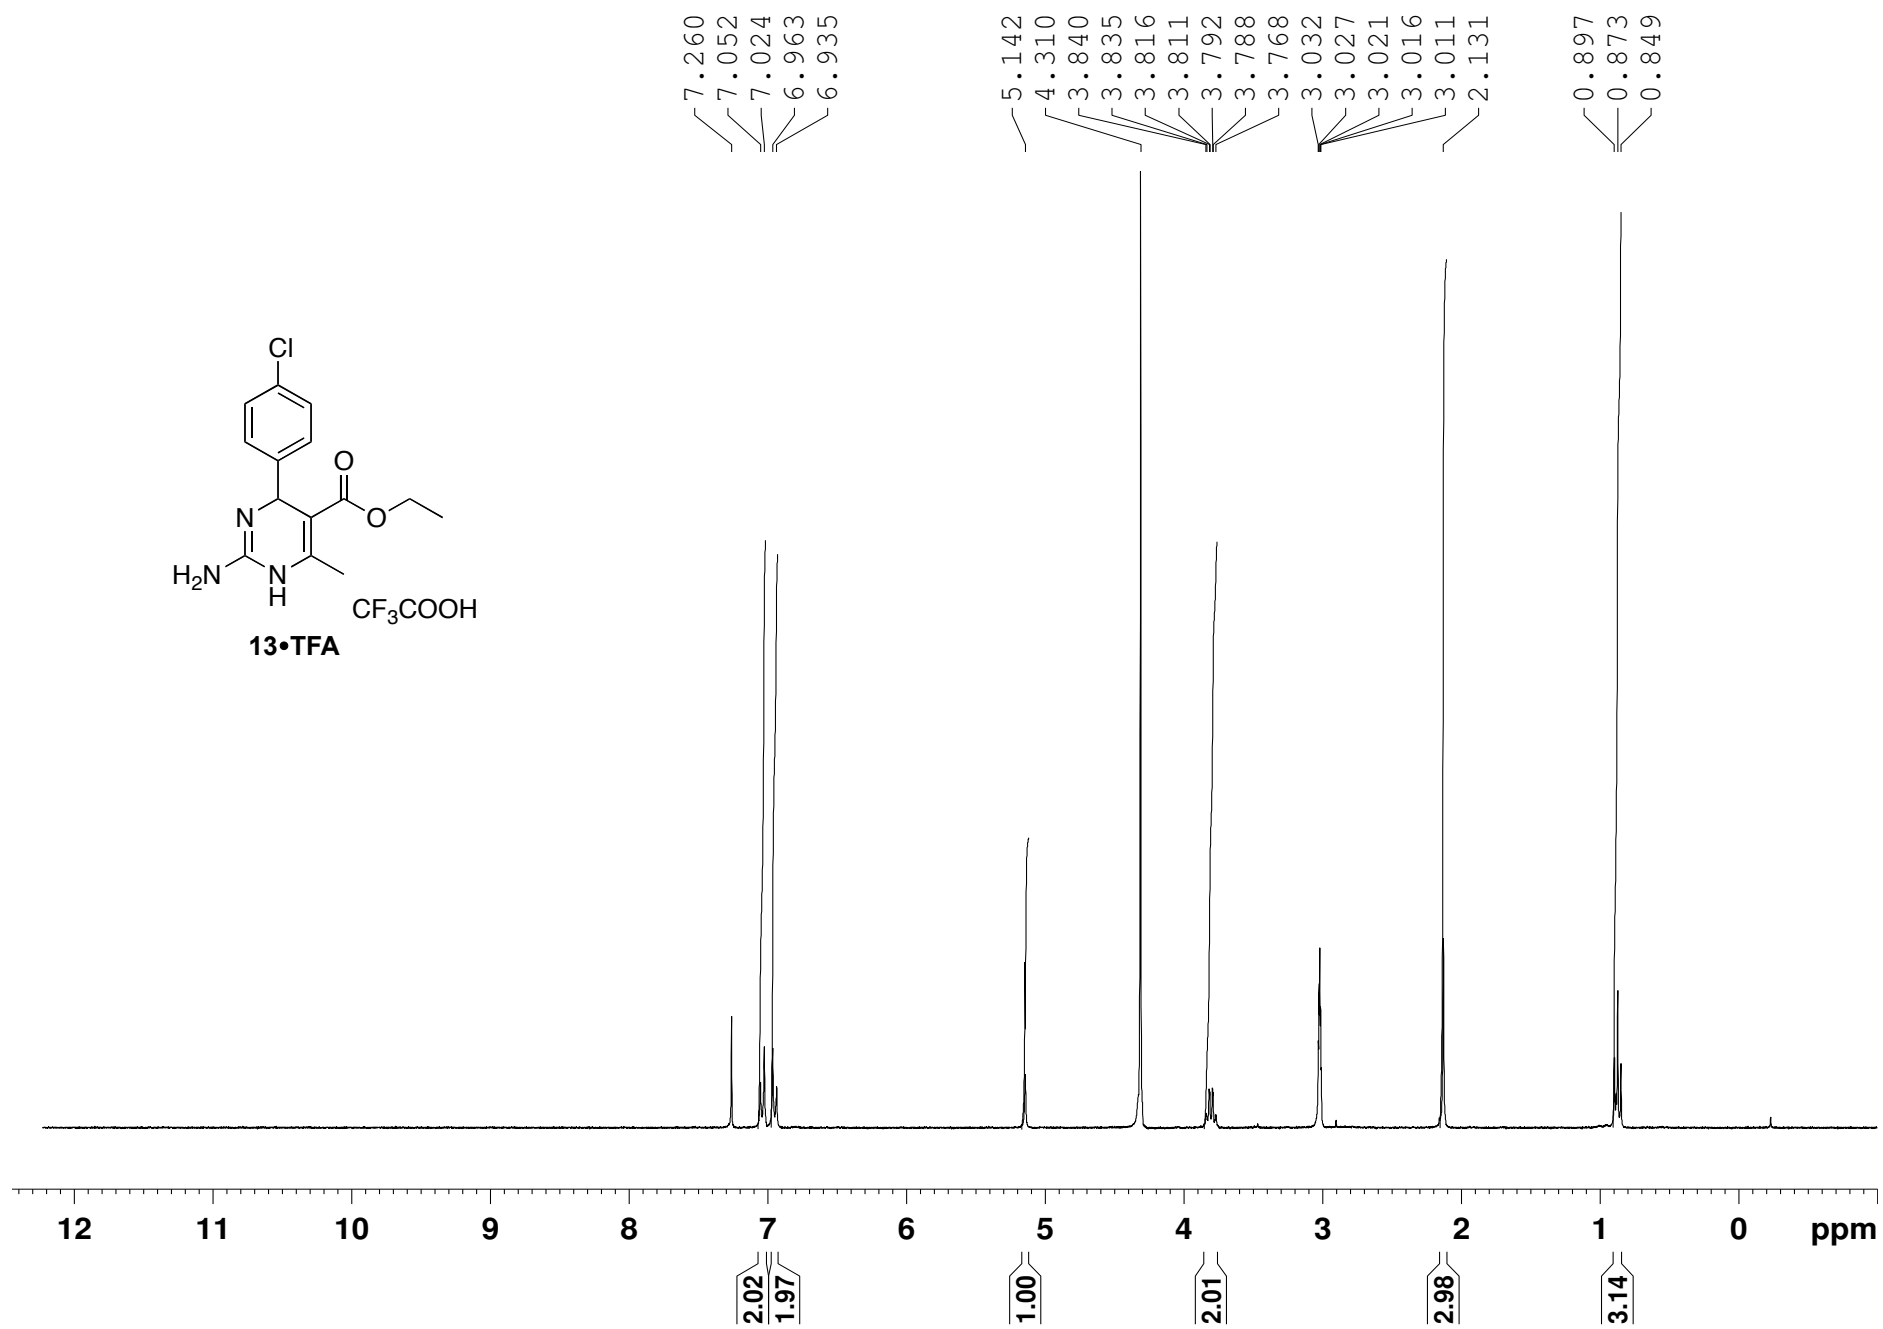



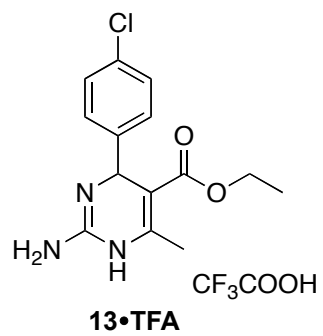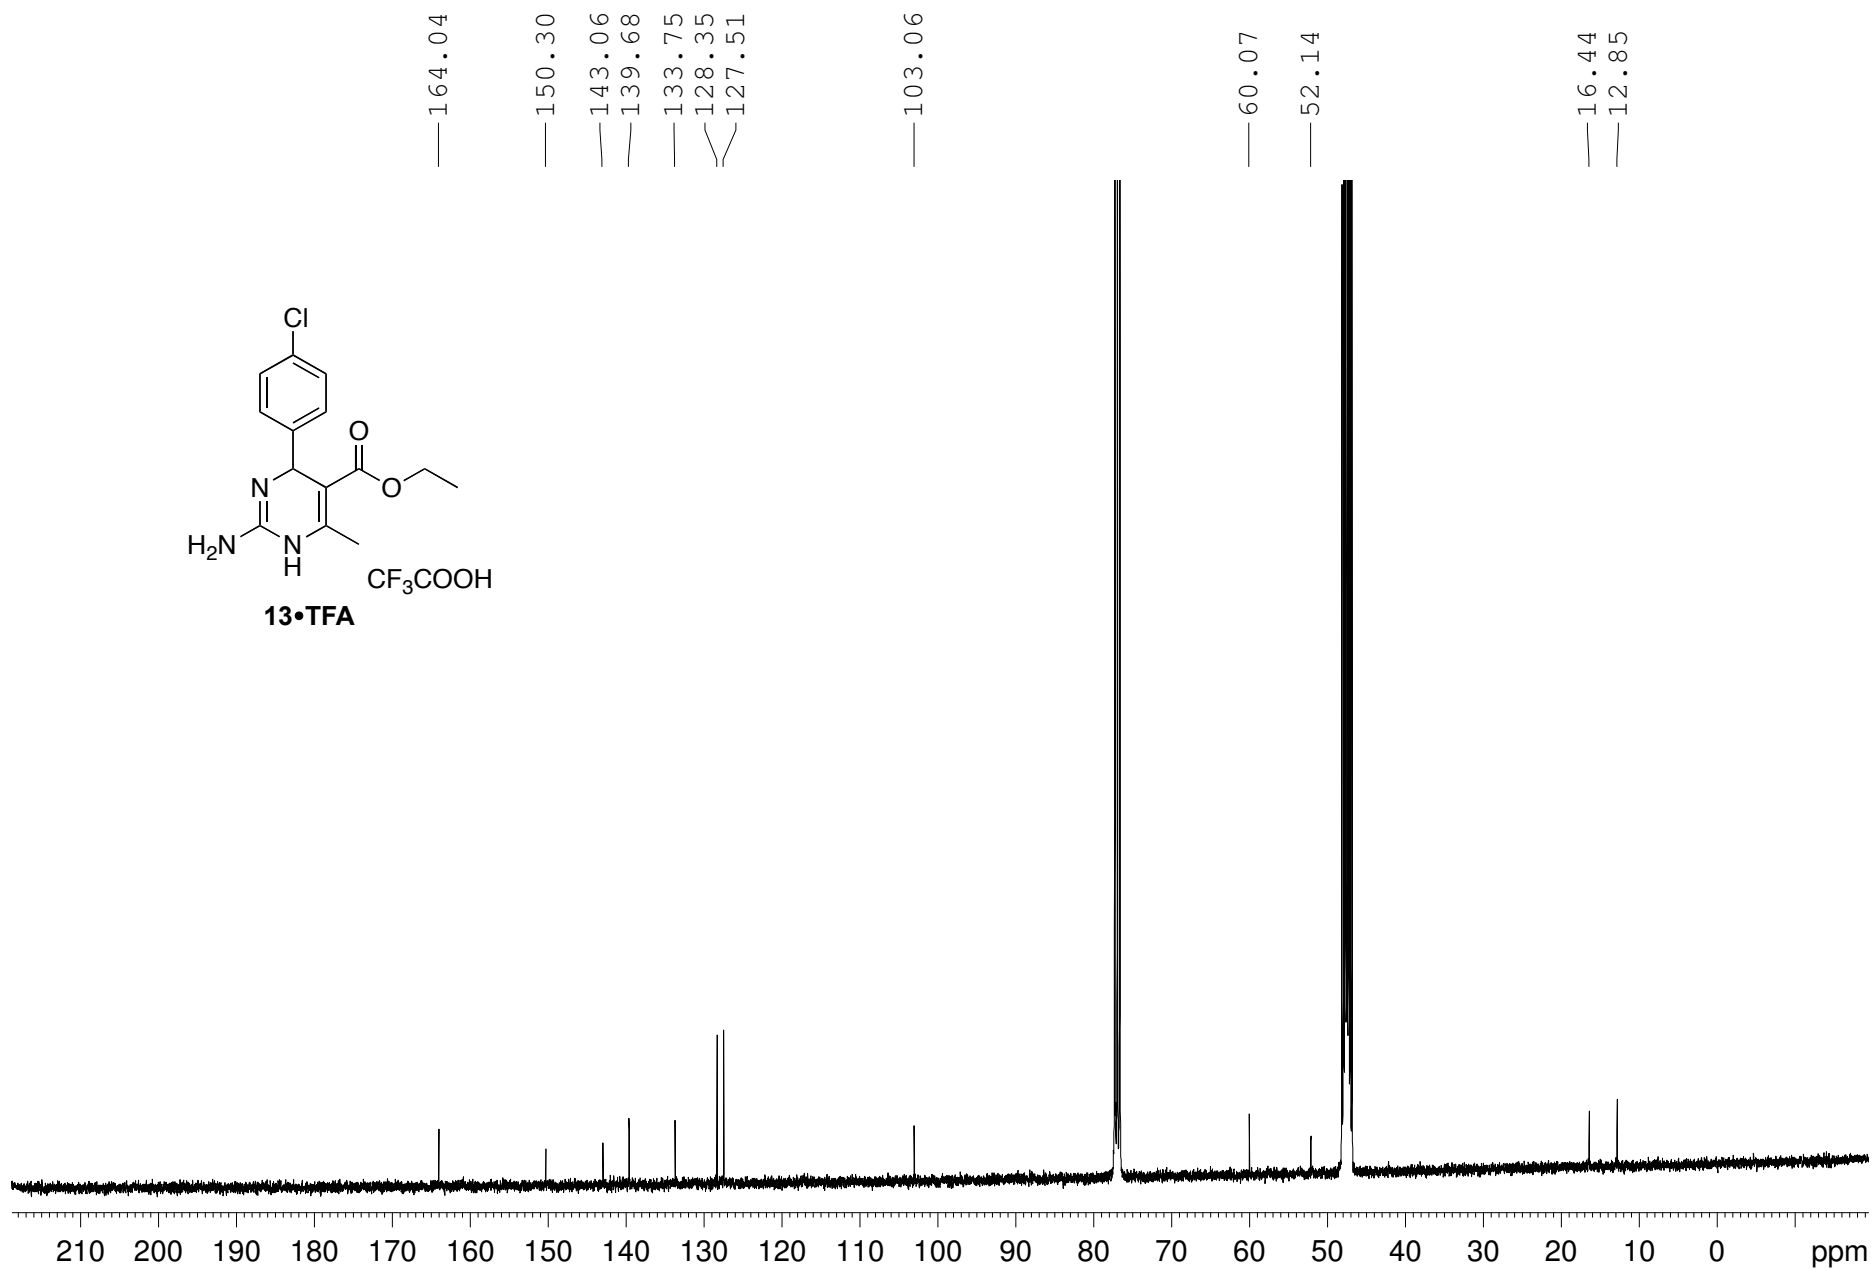

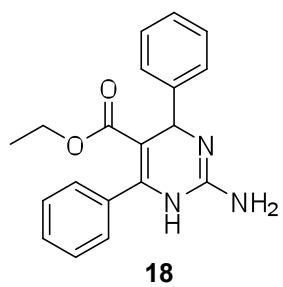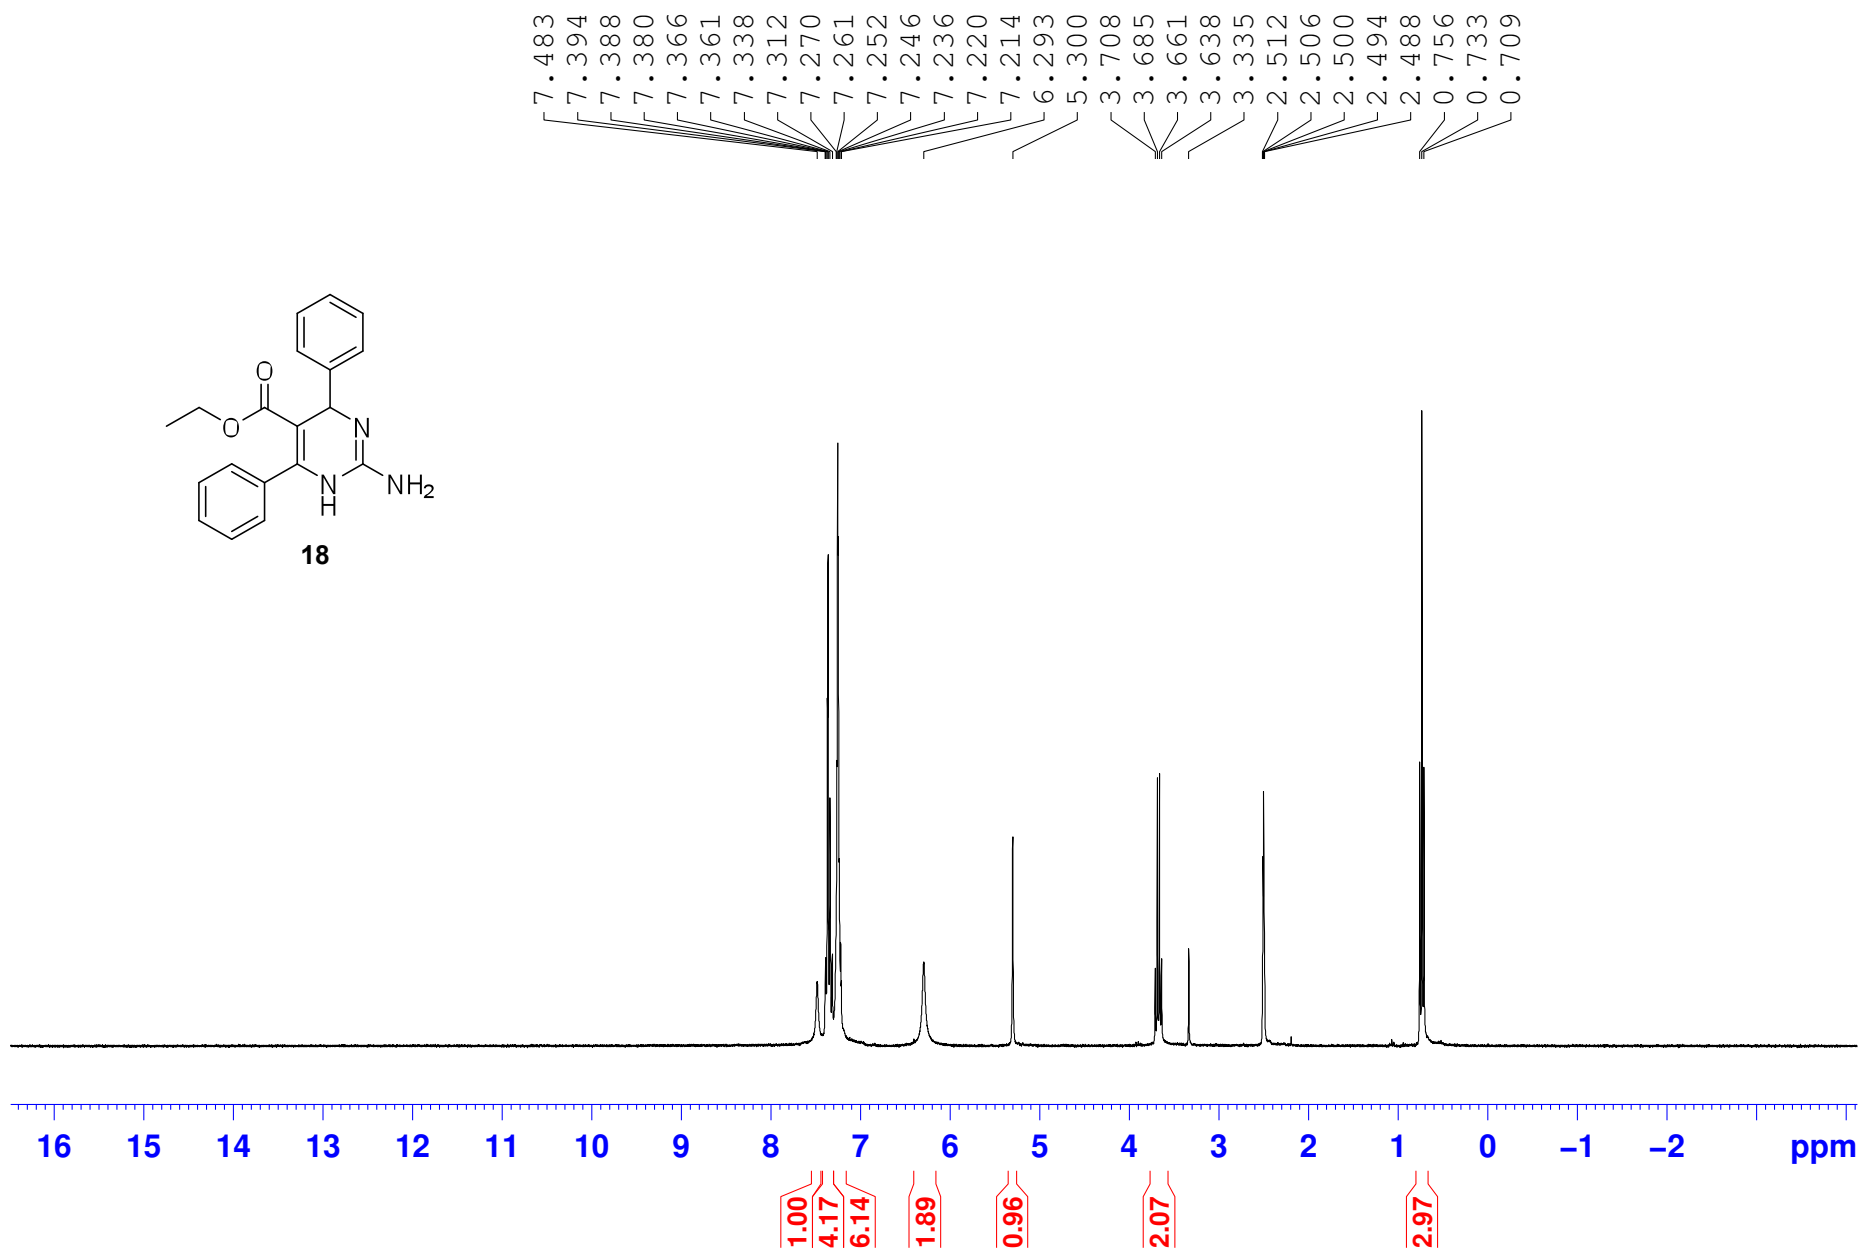

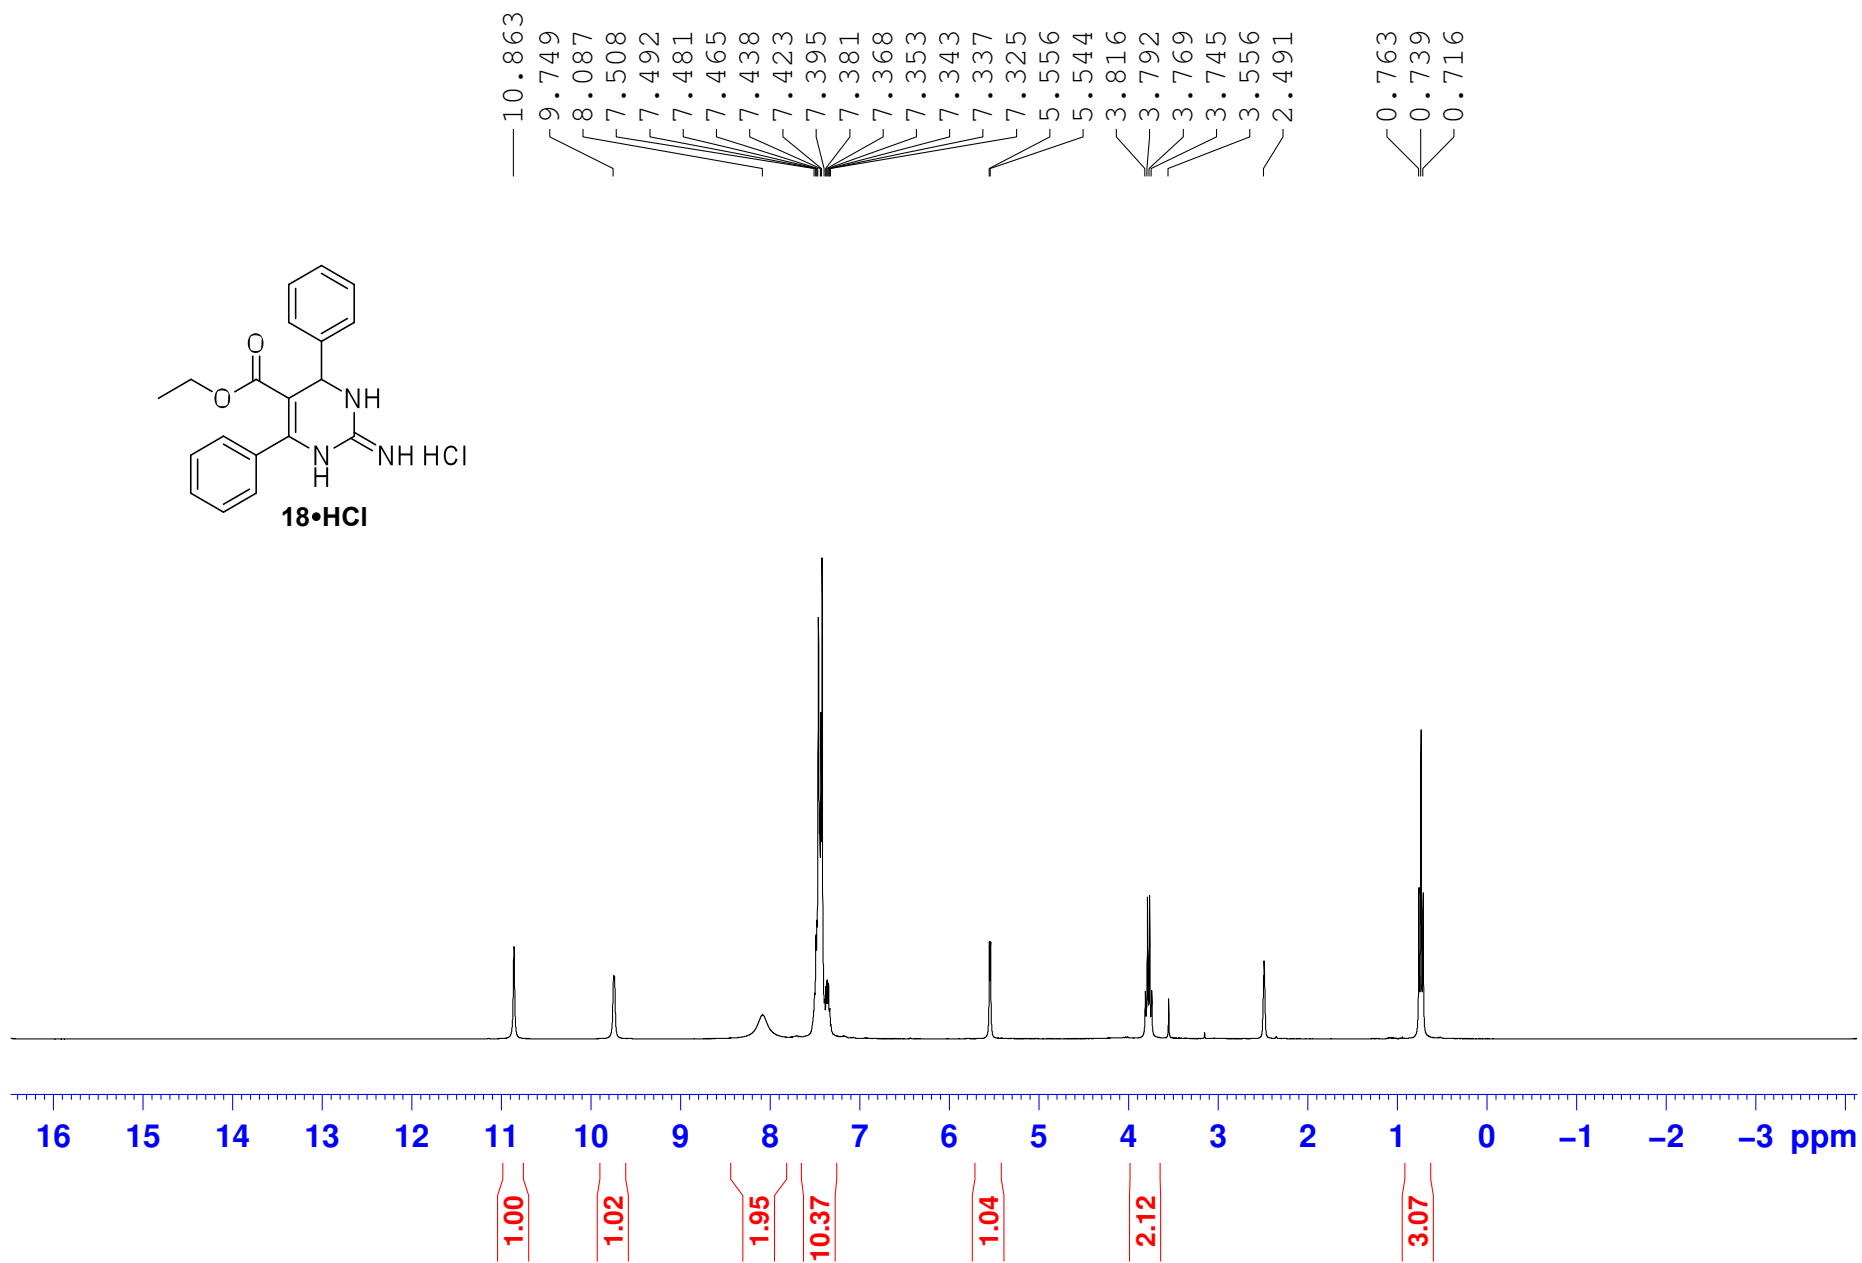

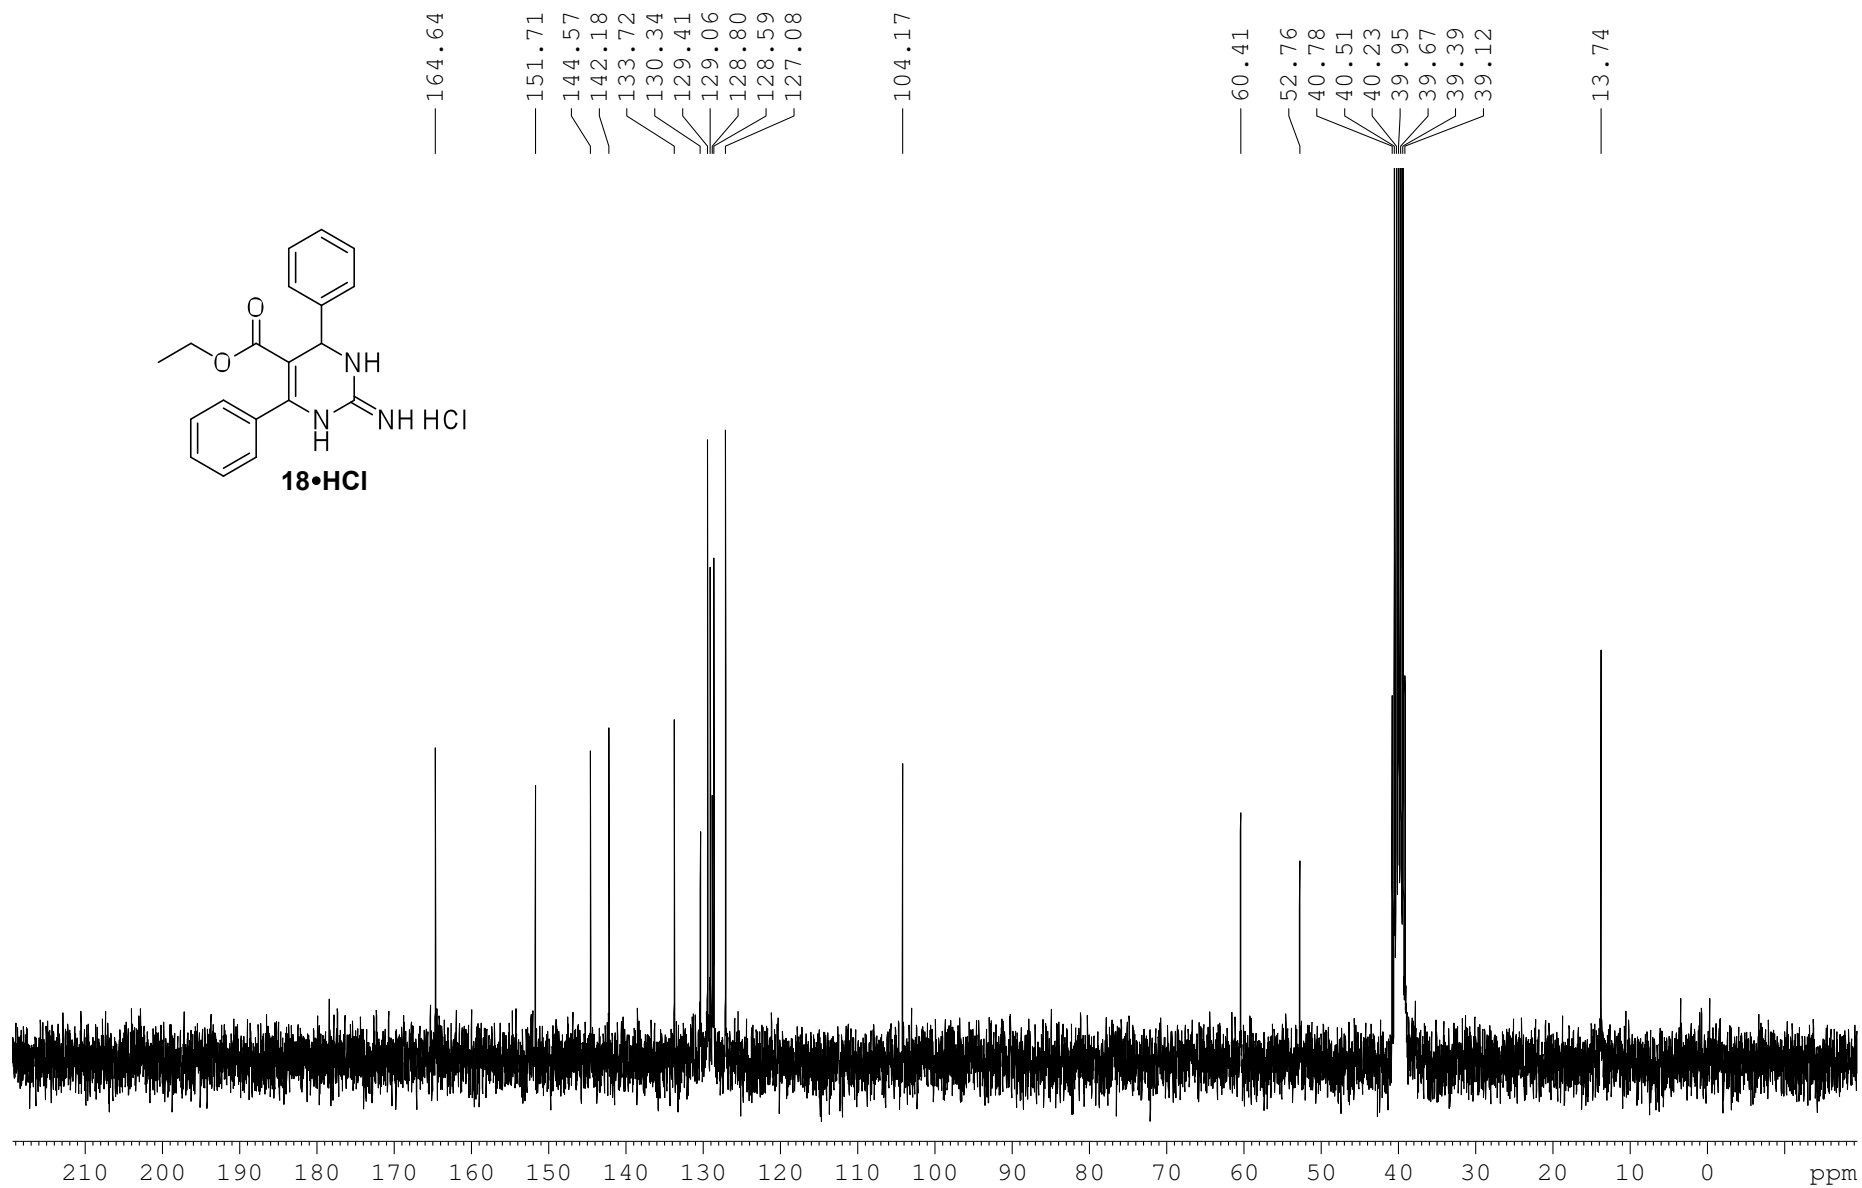

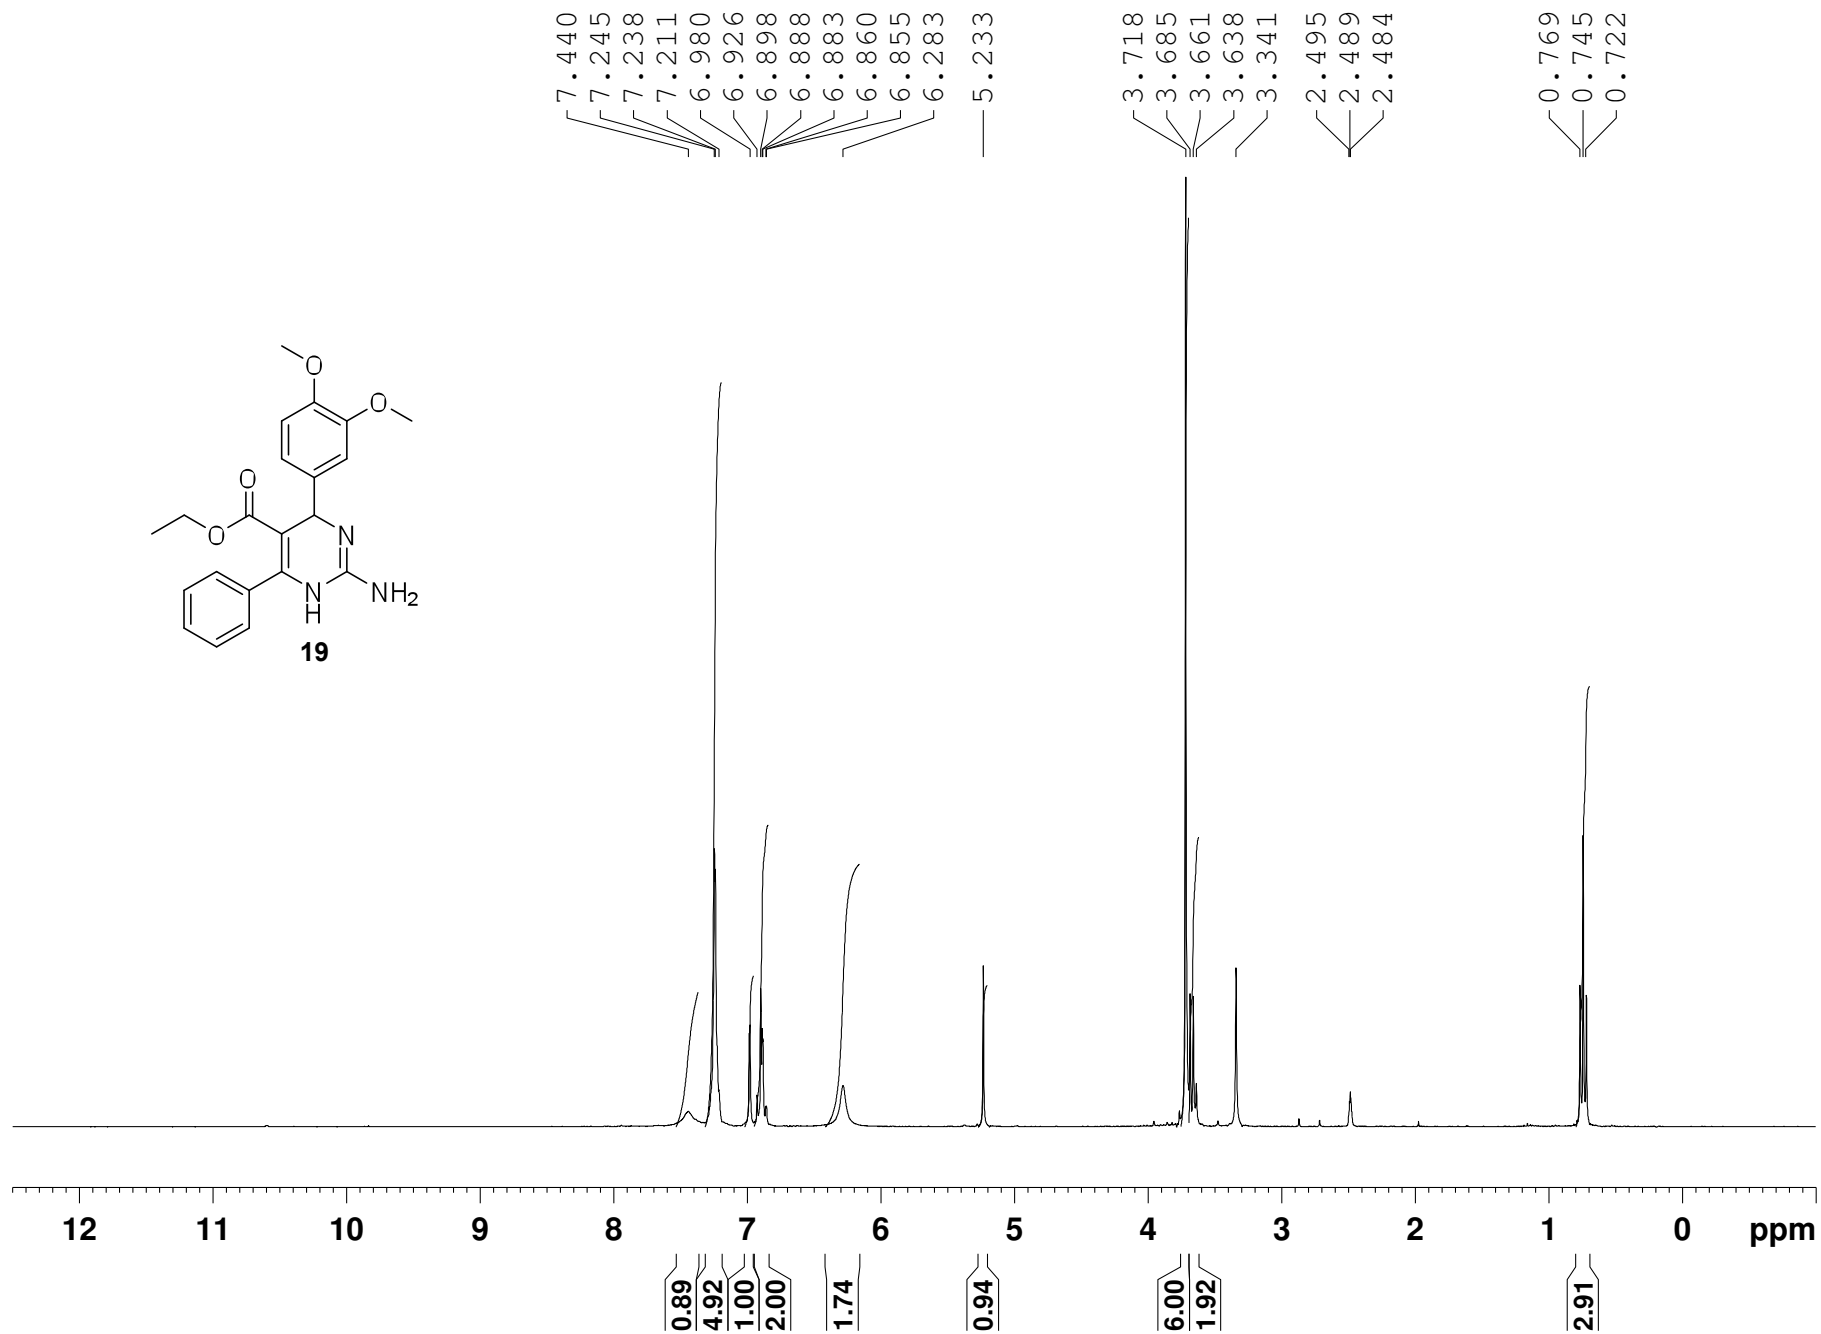

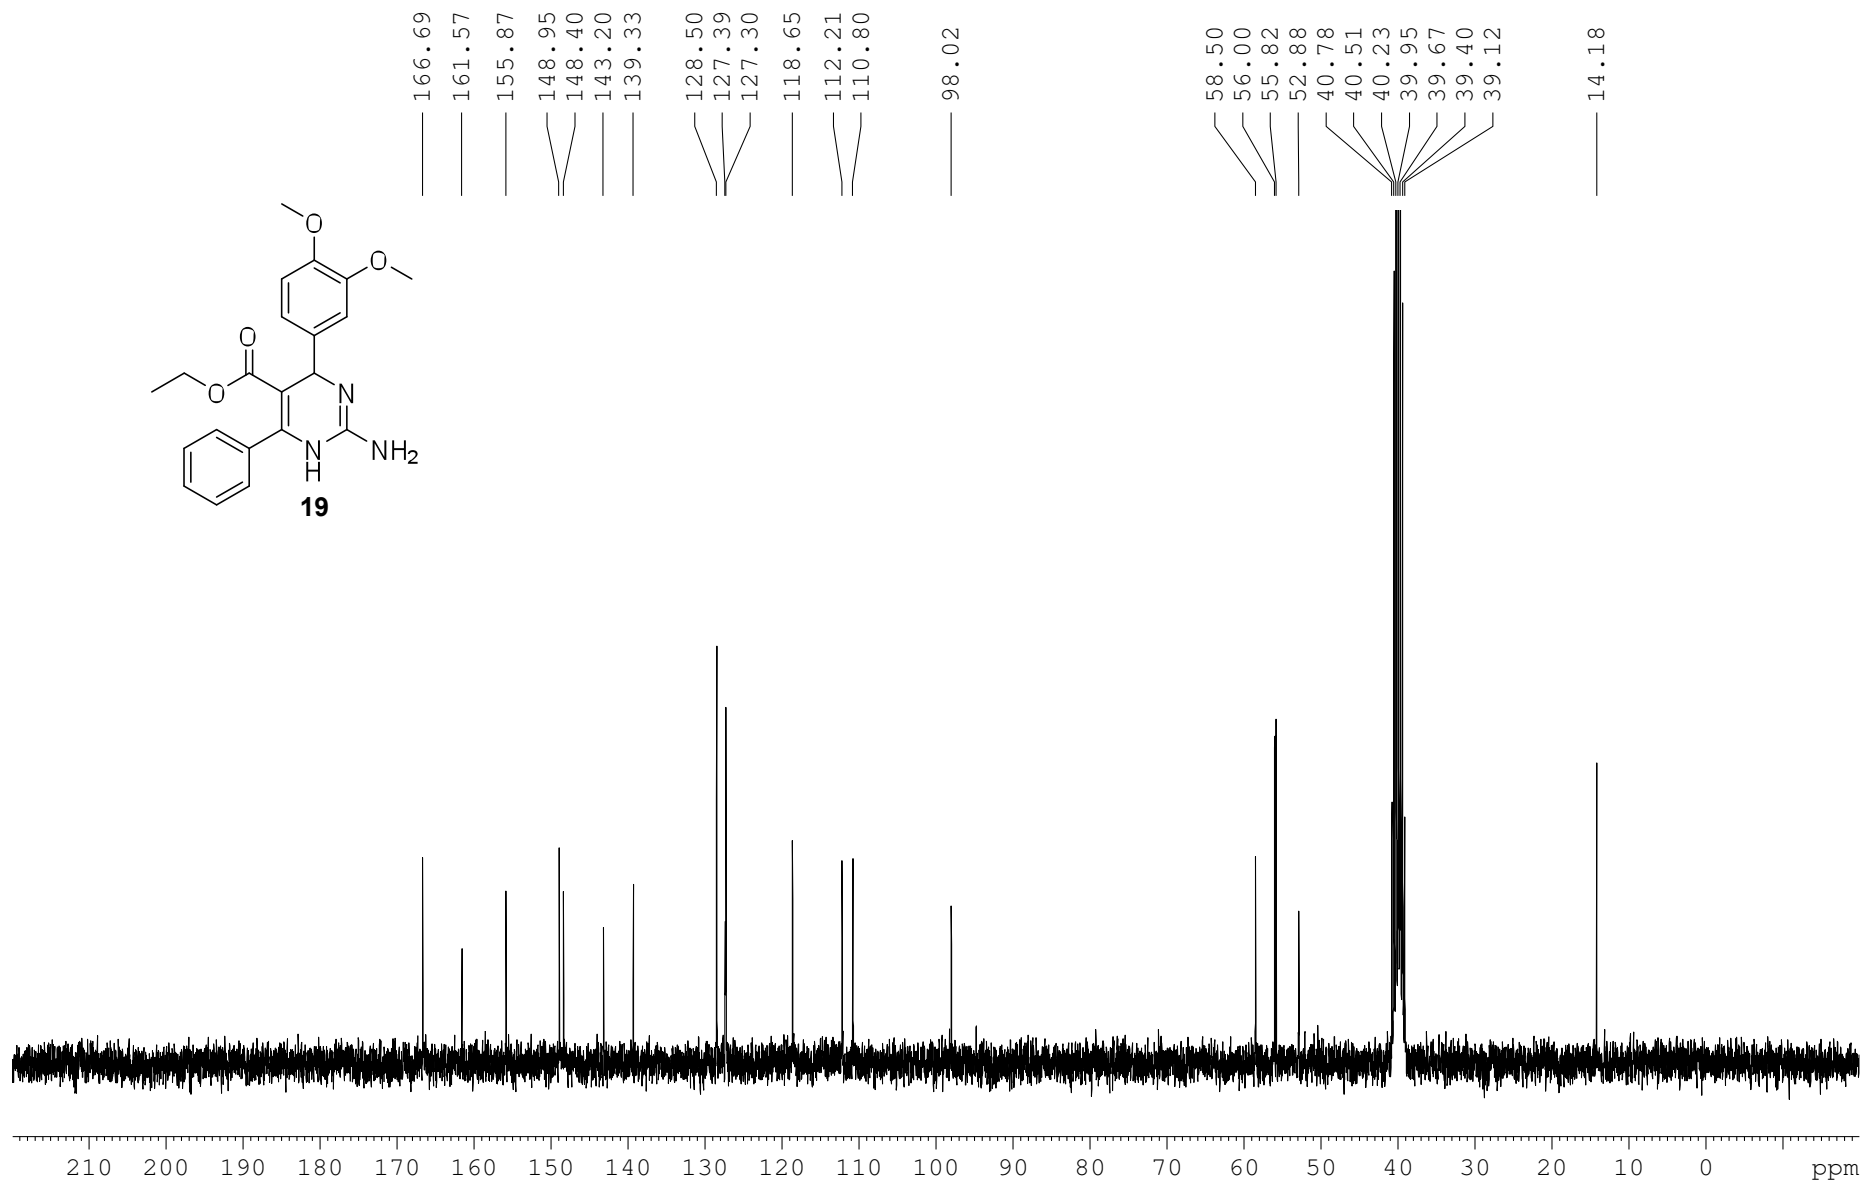

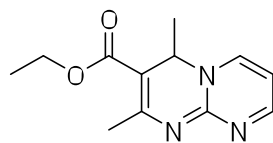**22**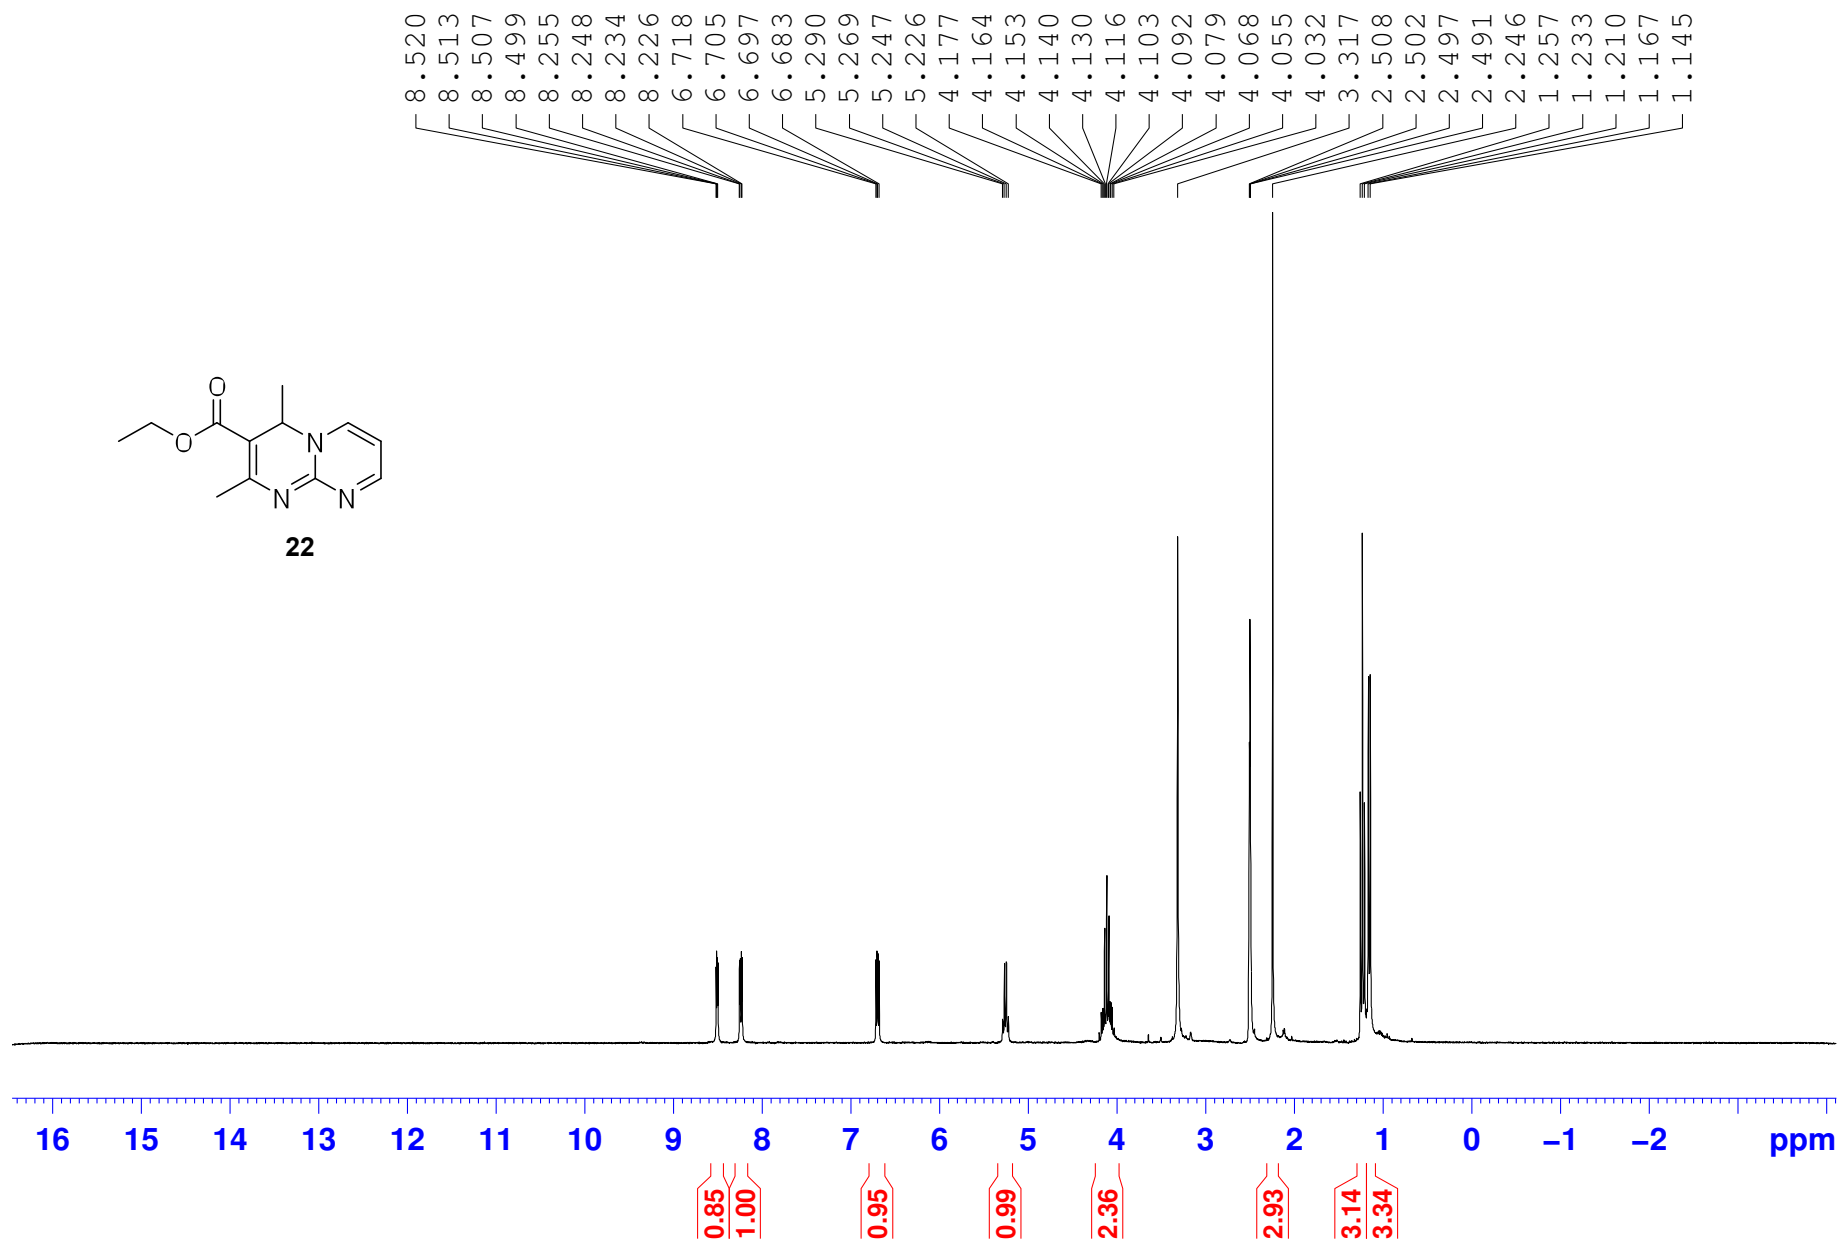

**22**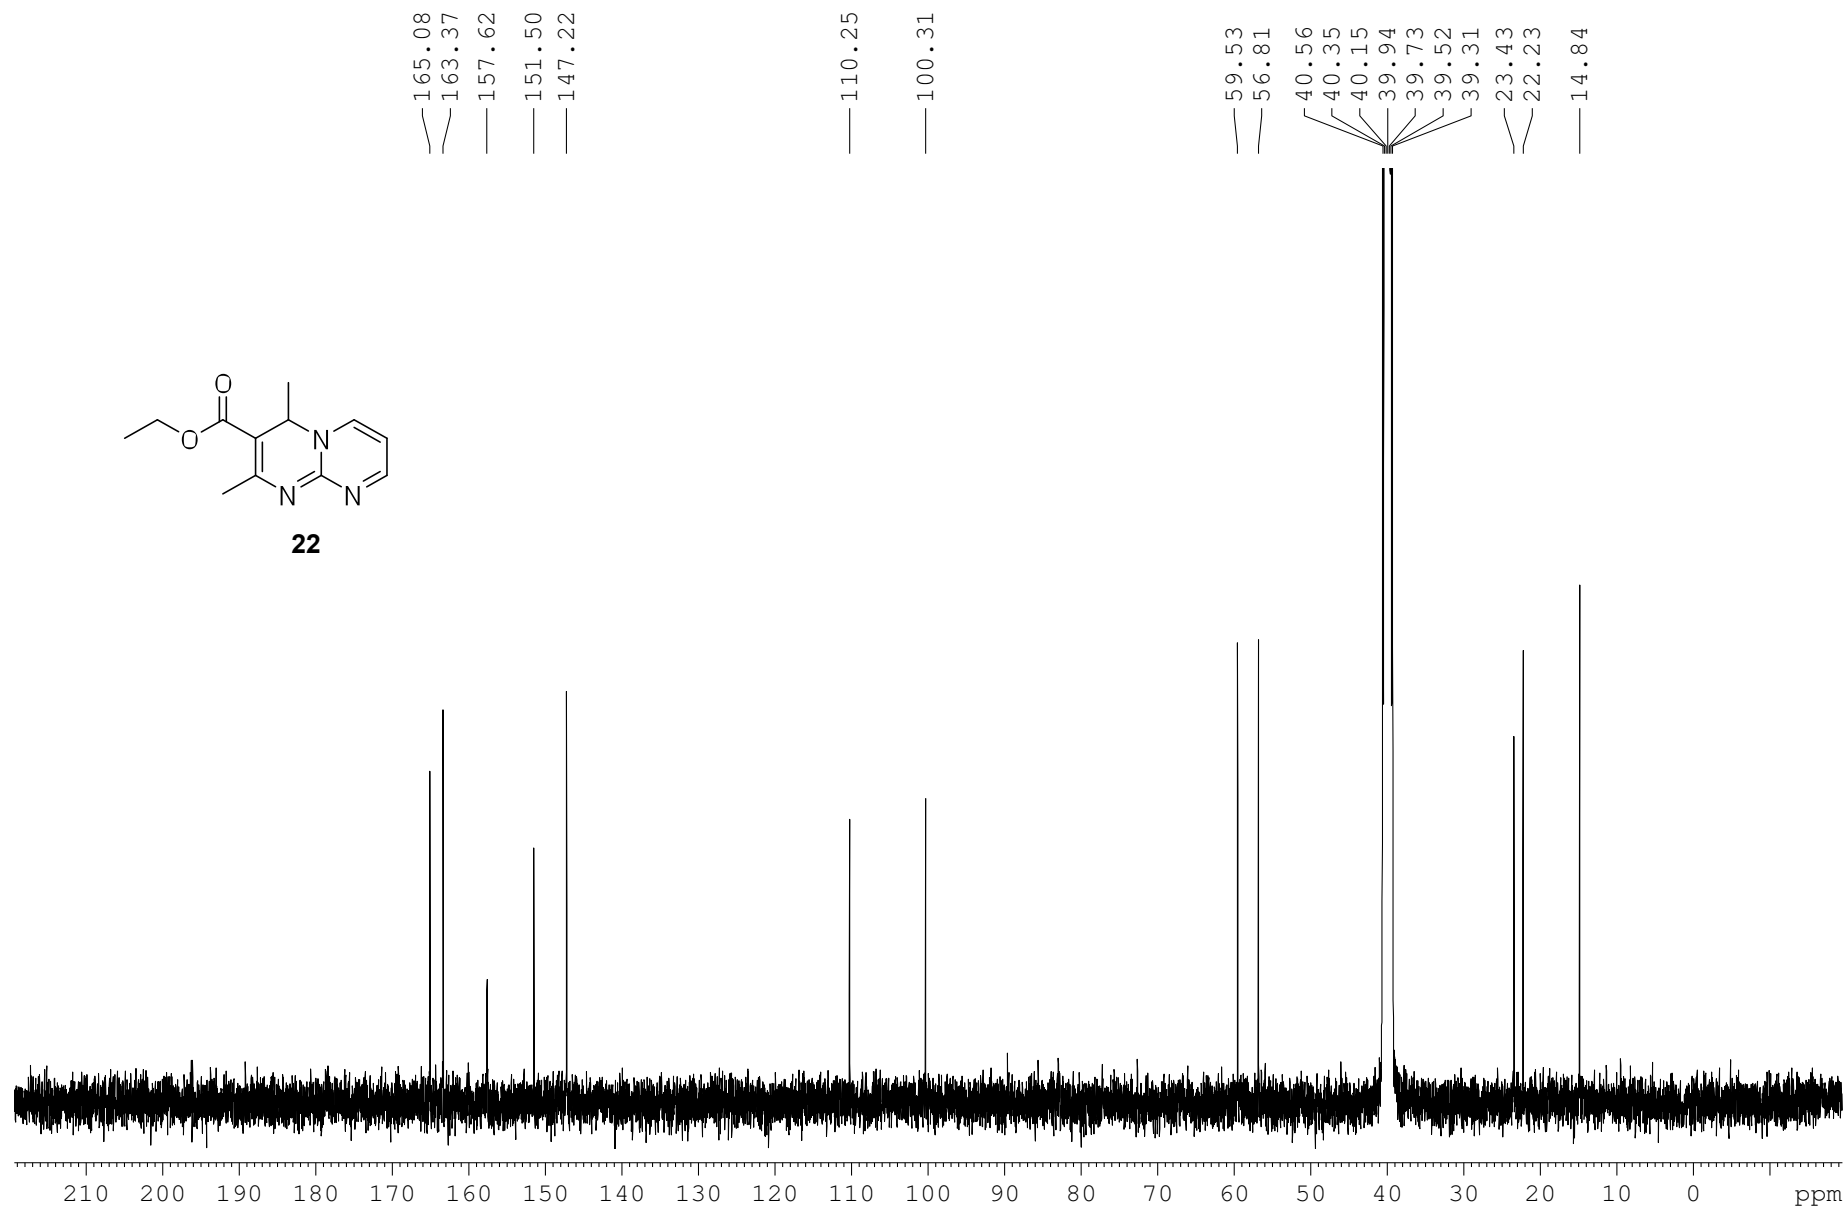



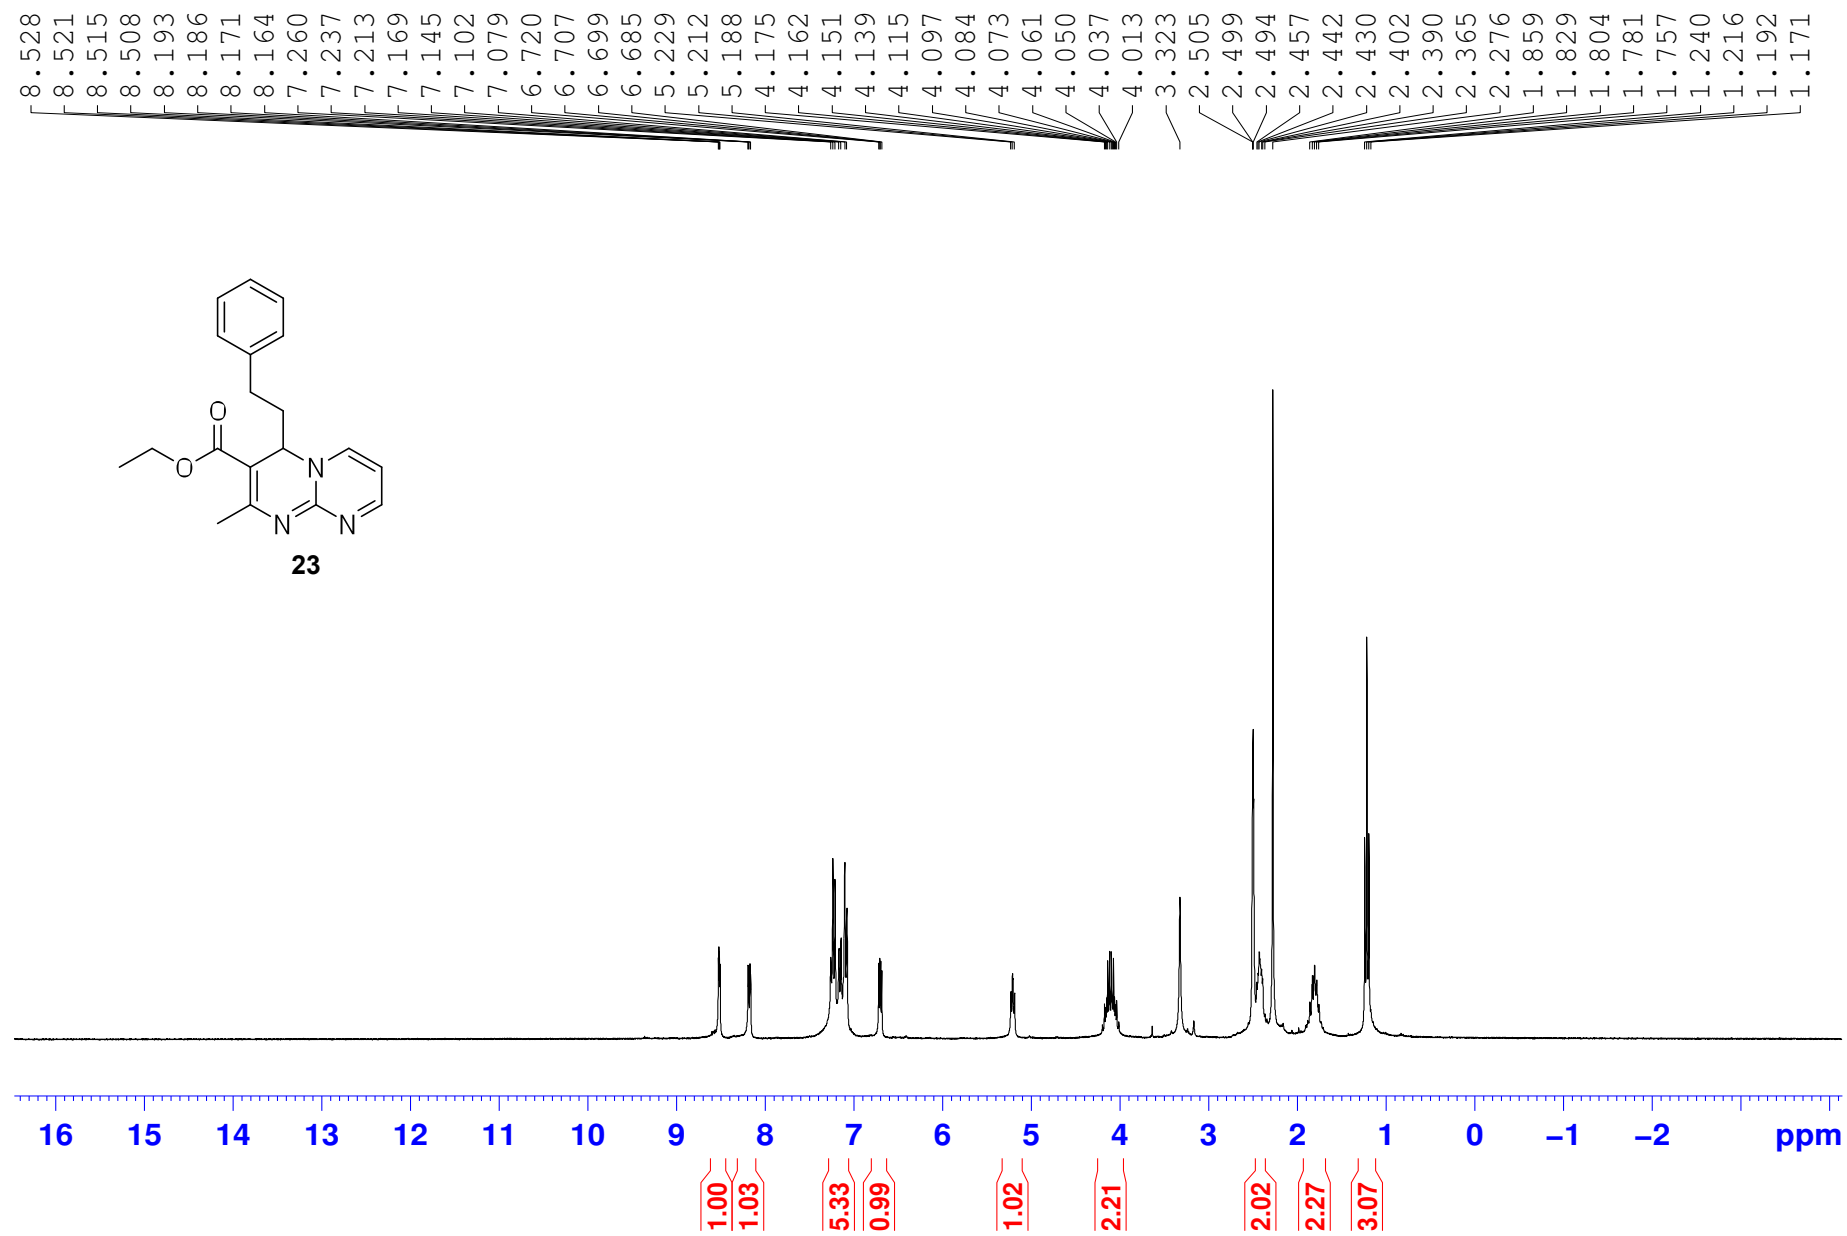

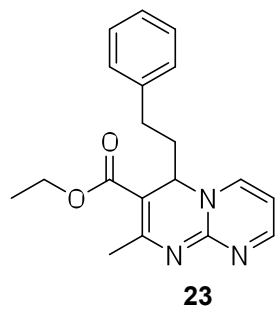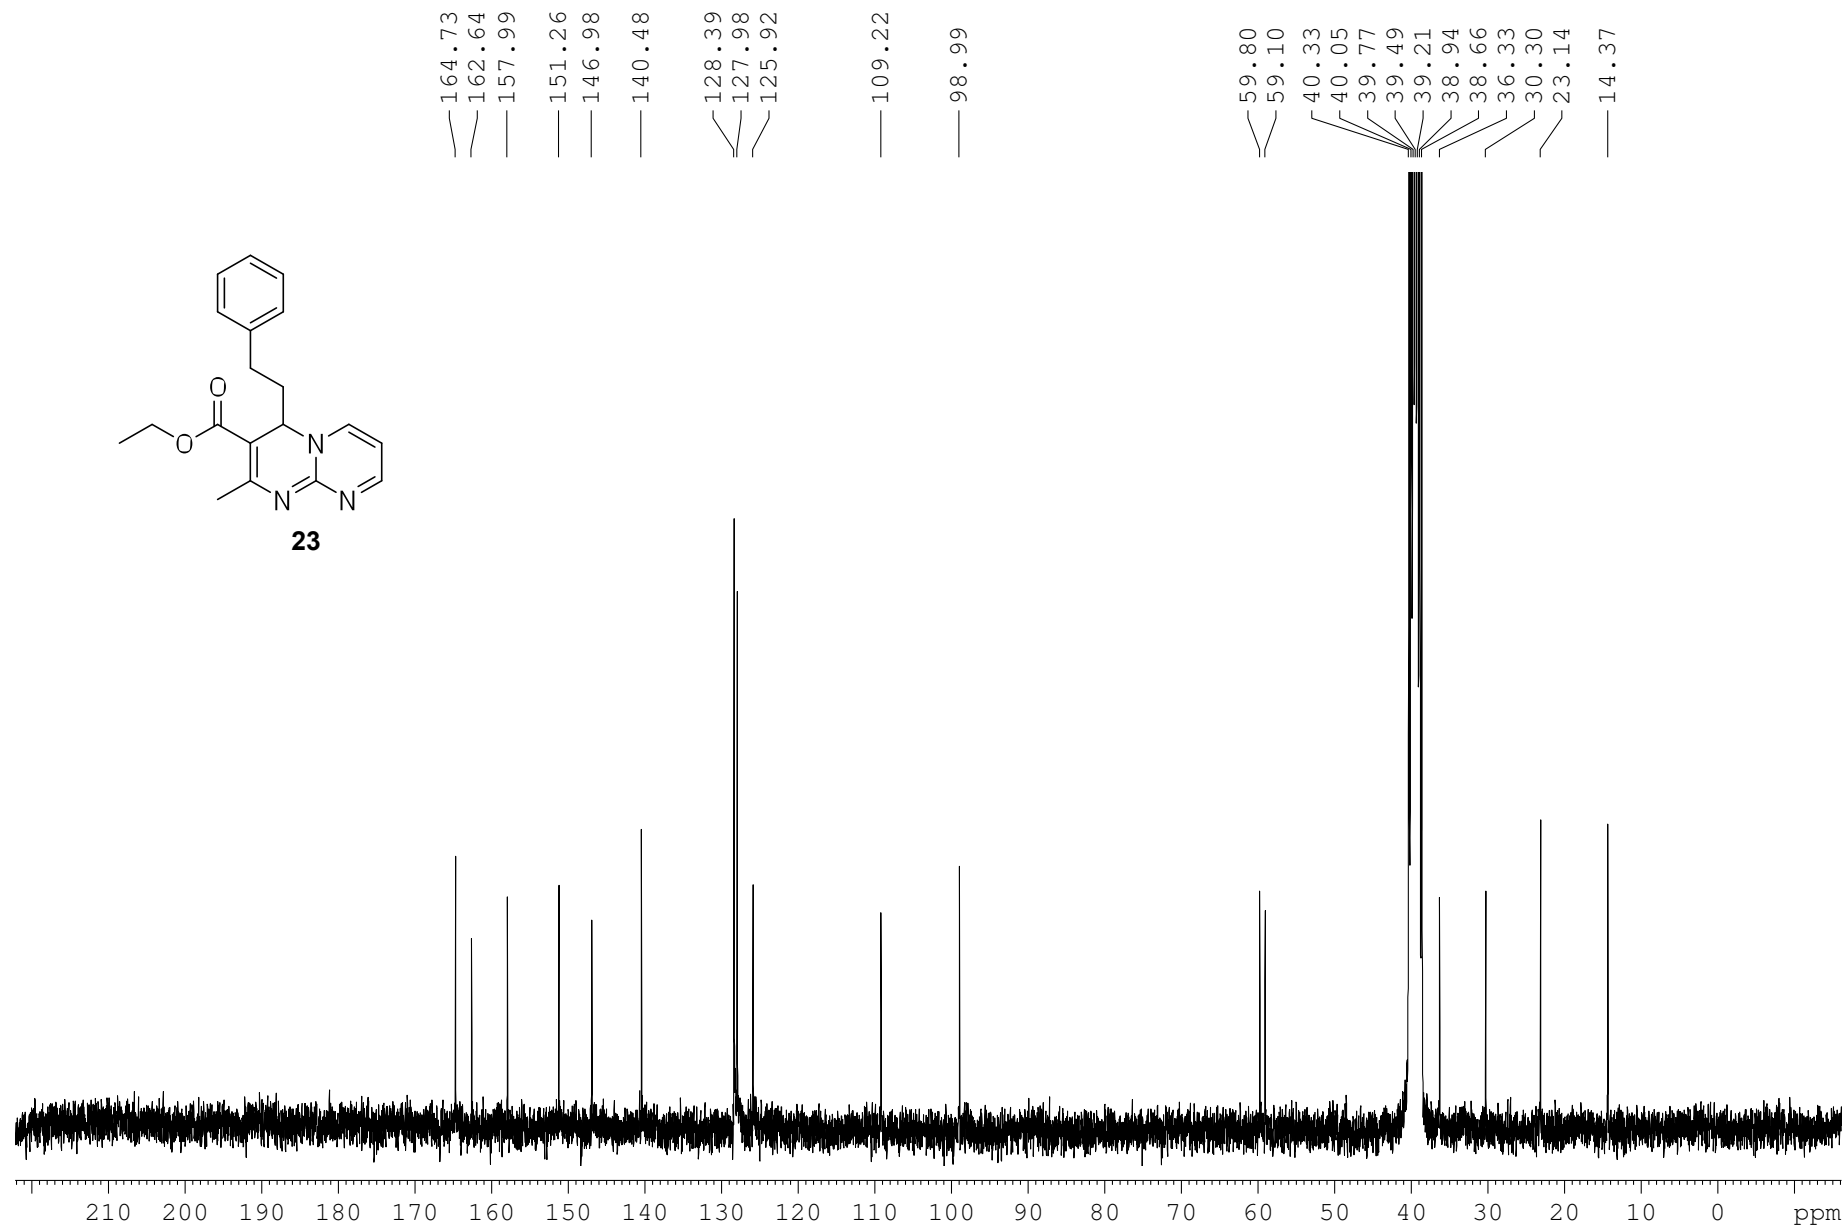

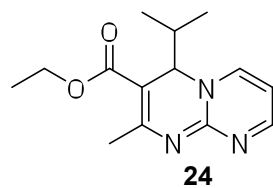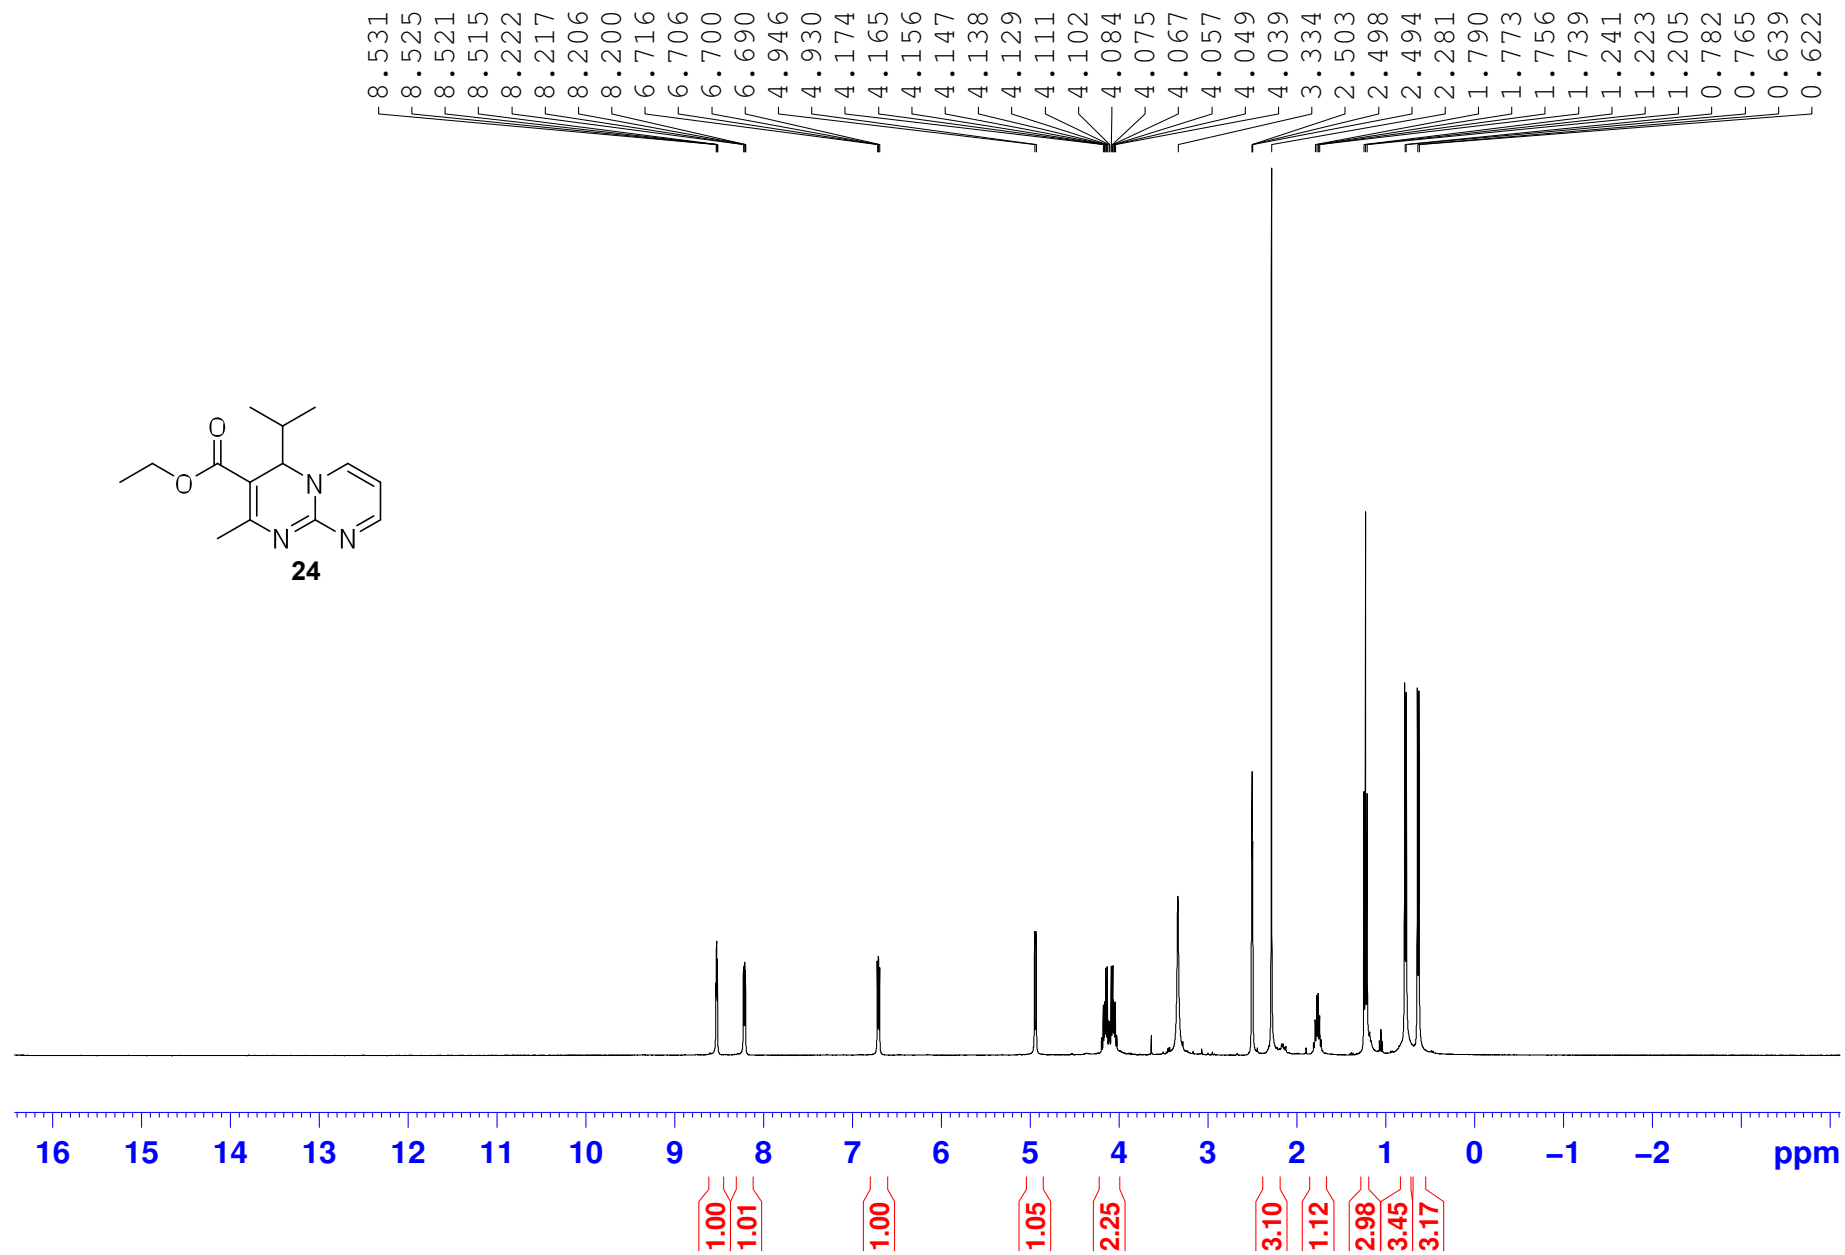

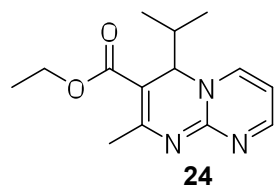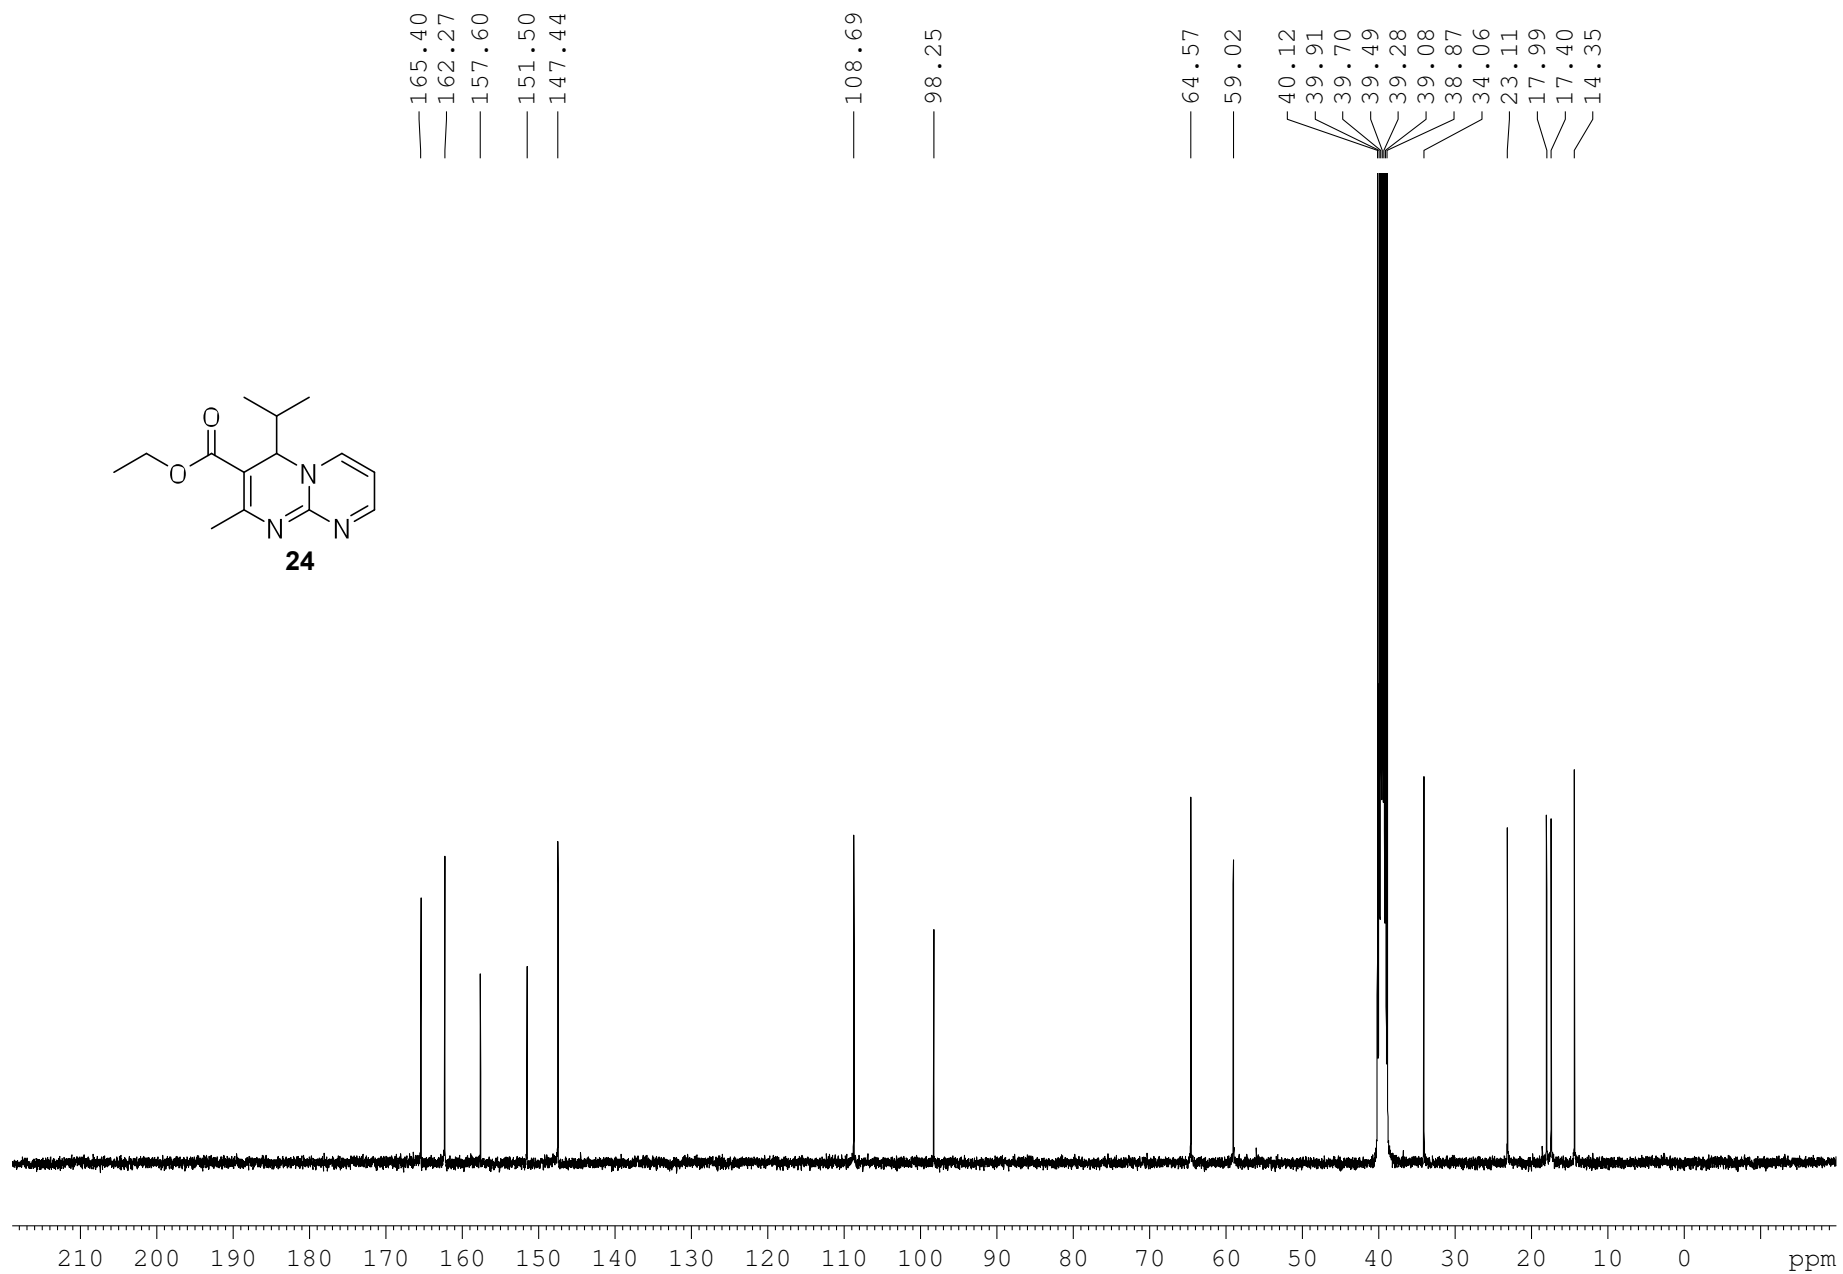

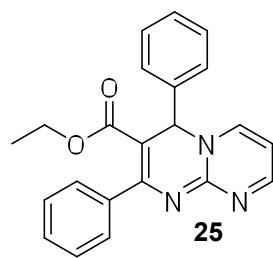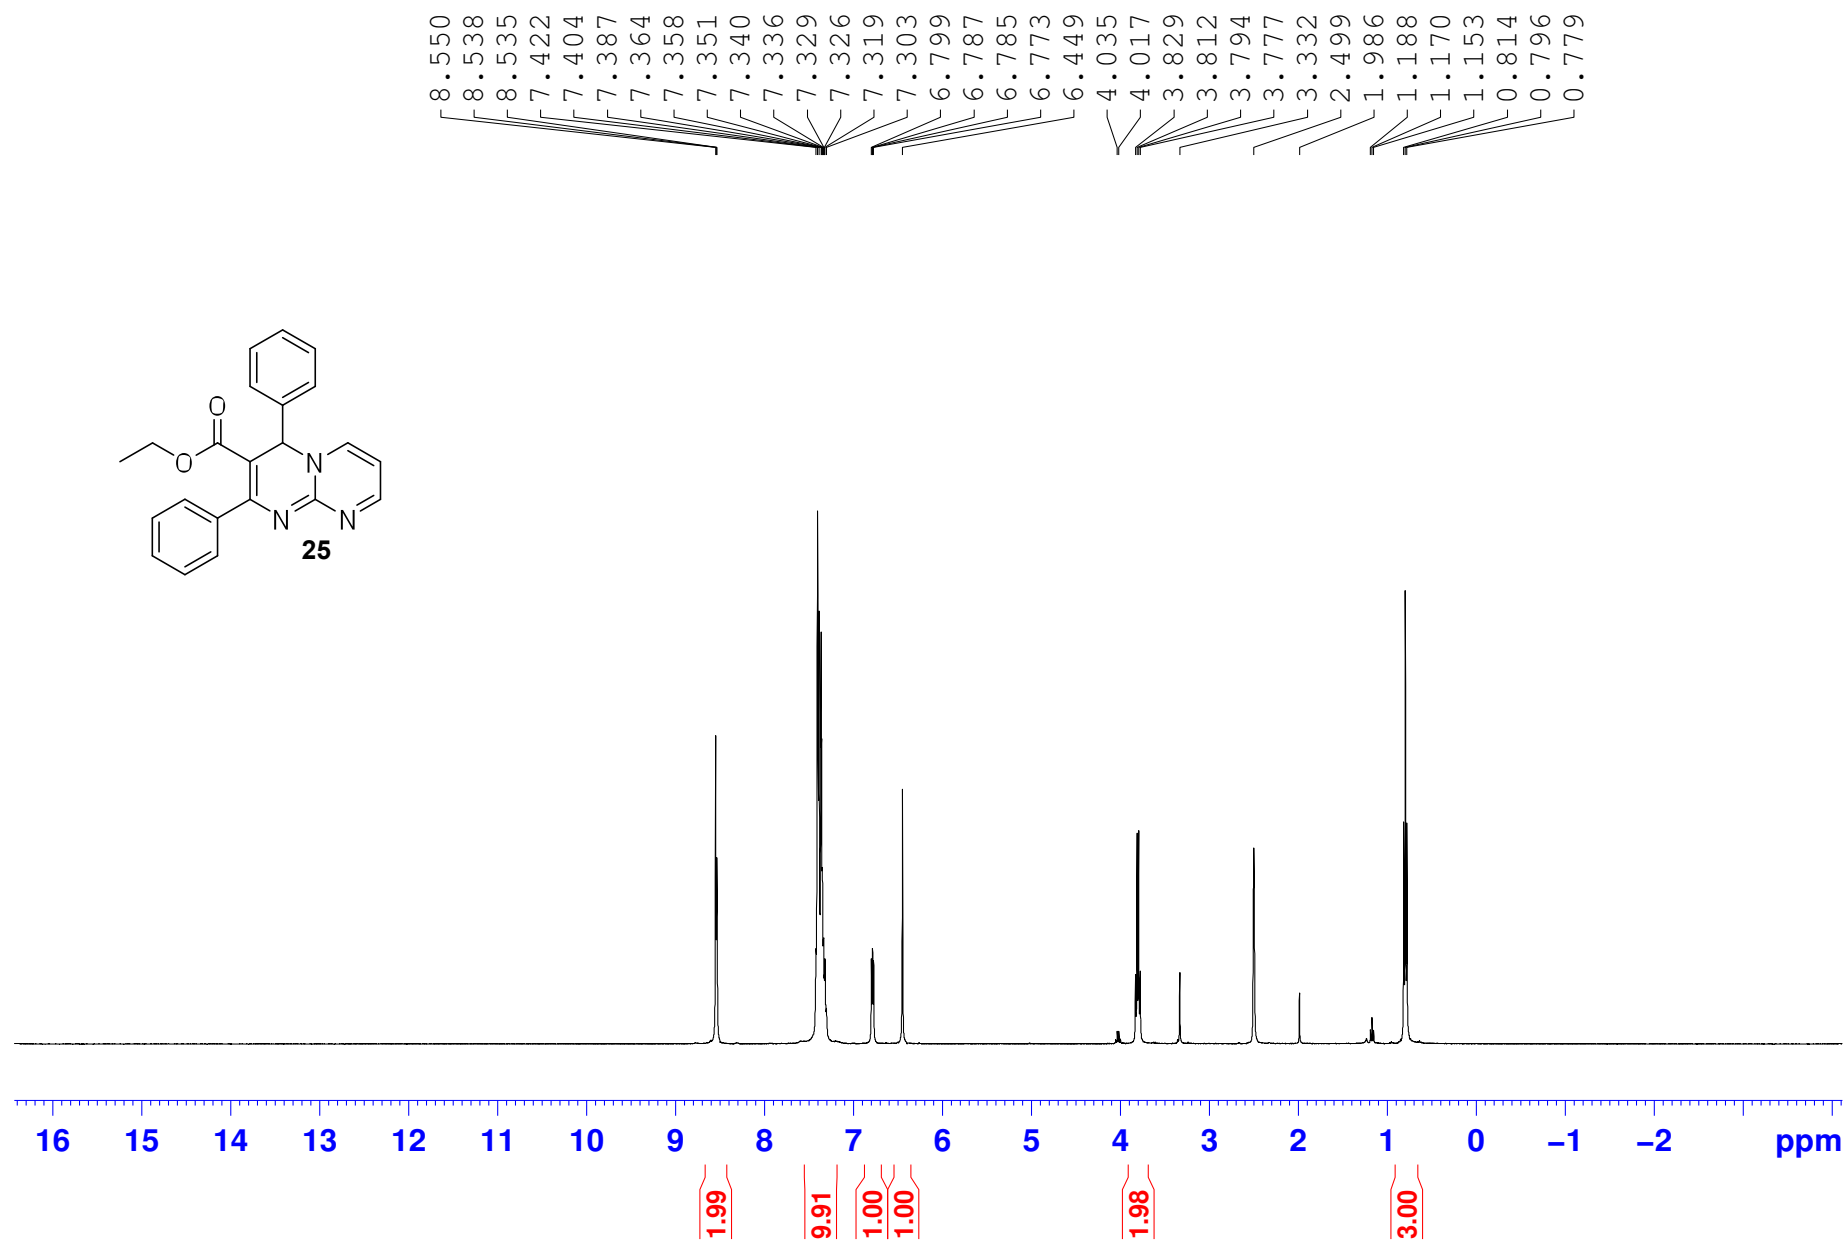

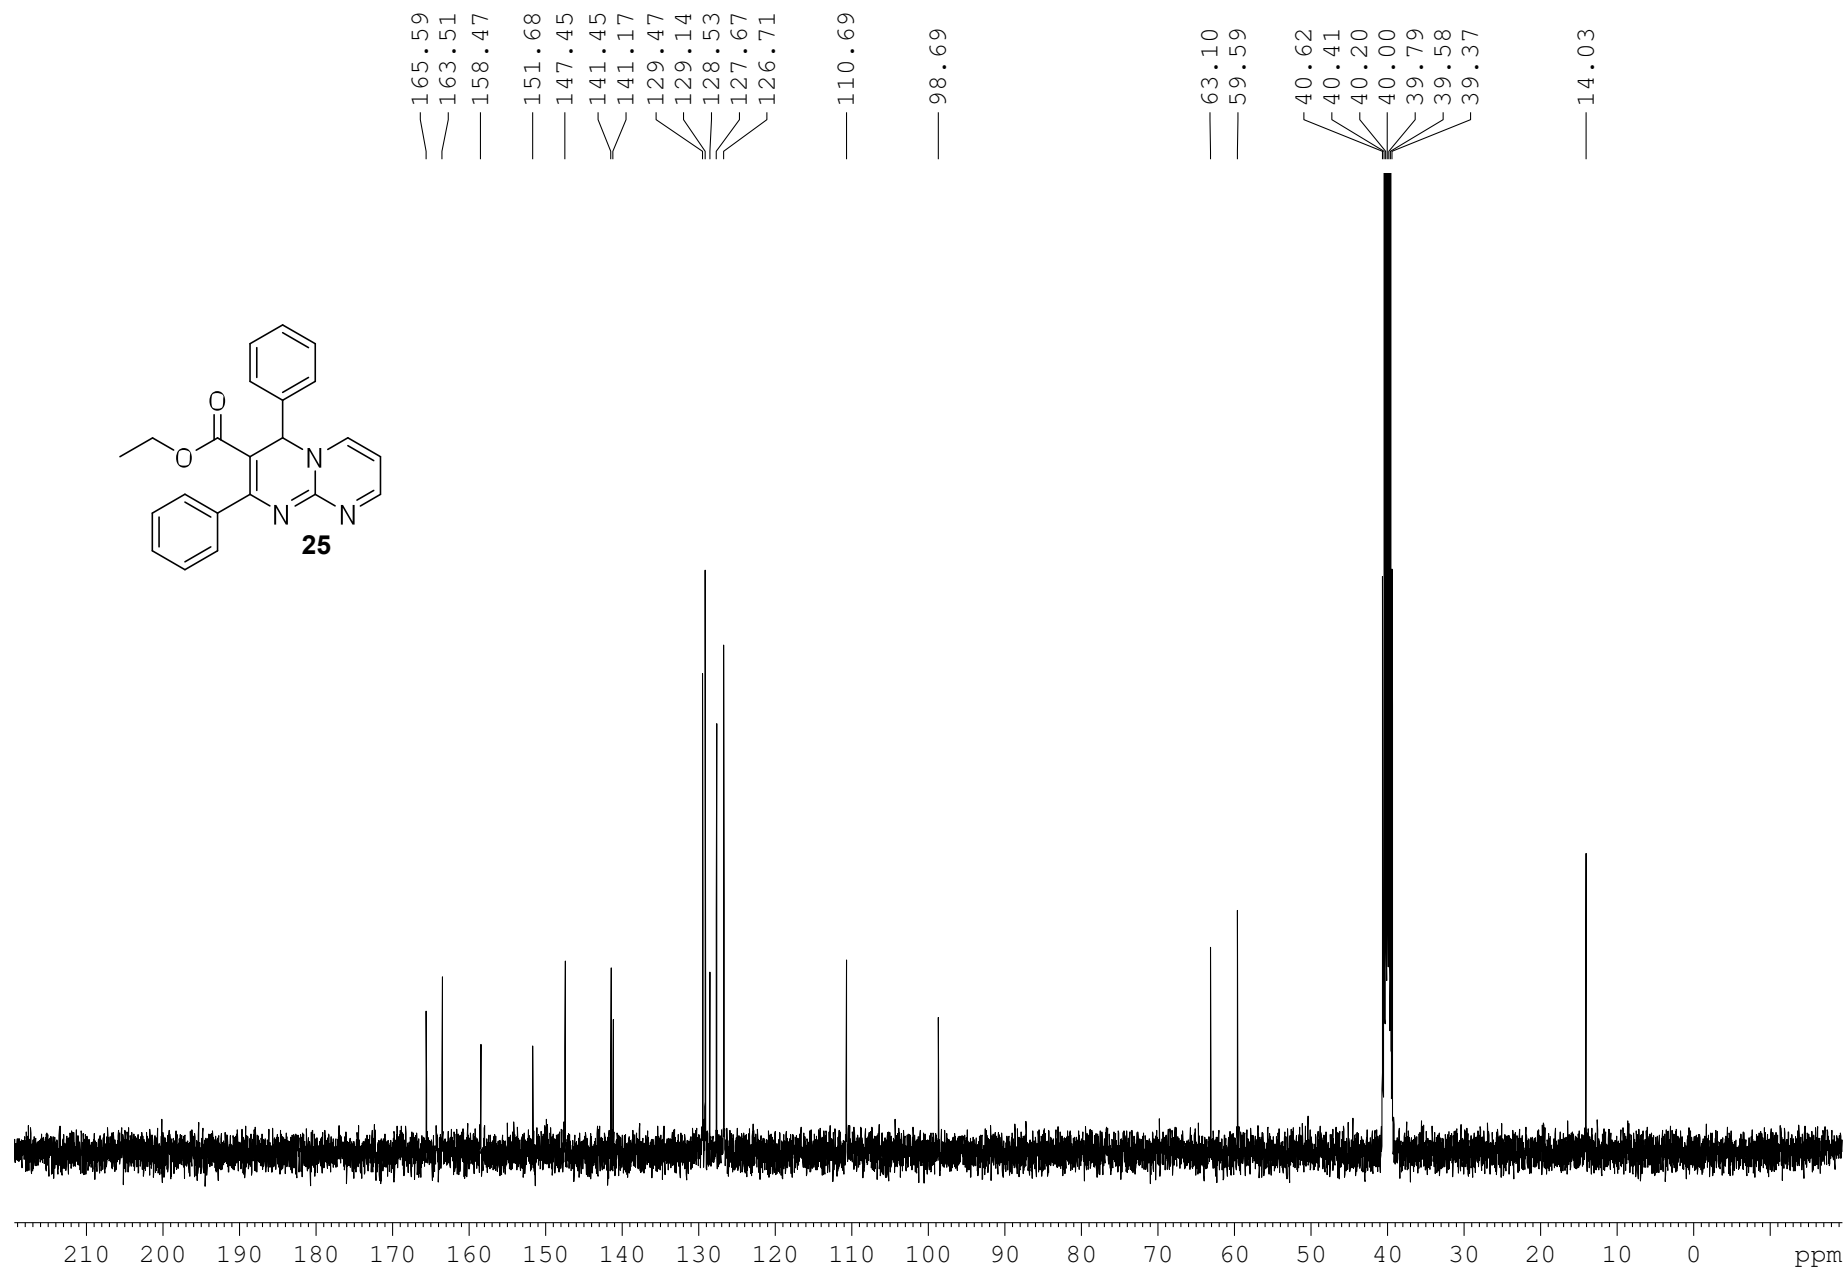

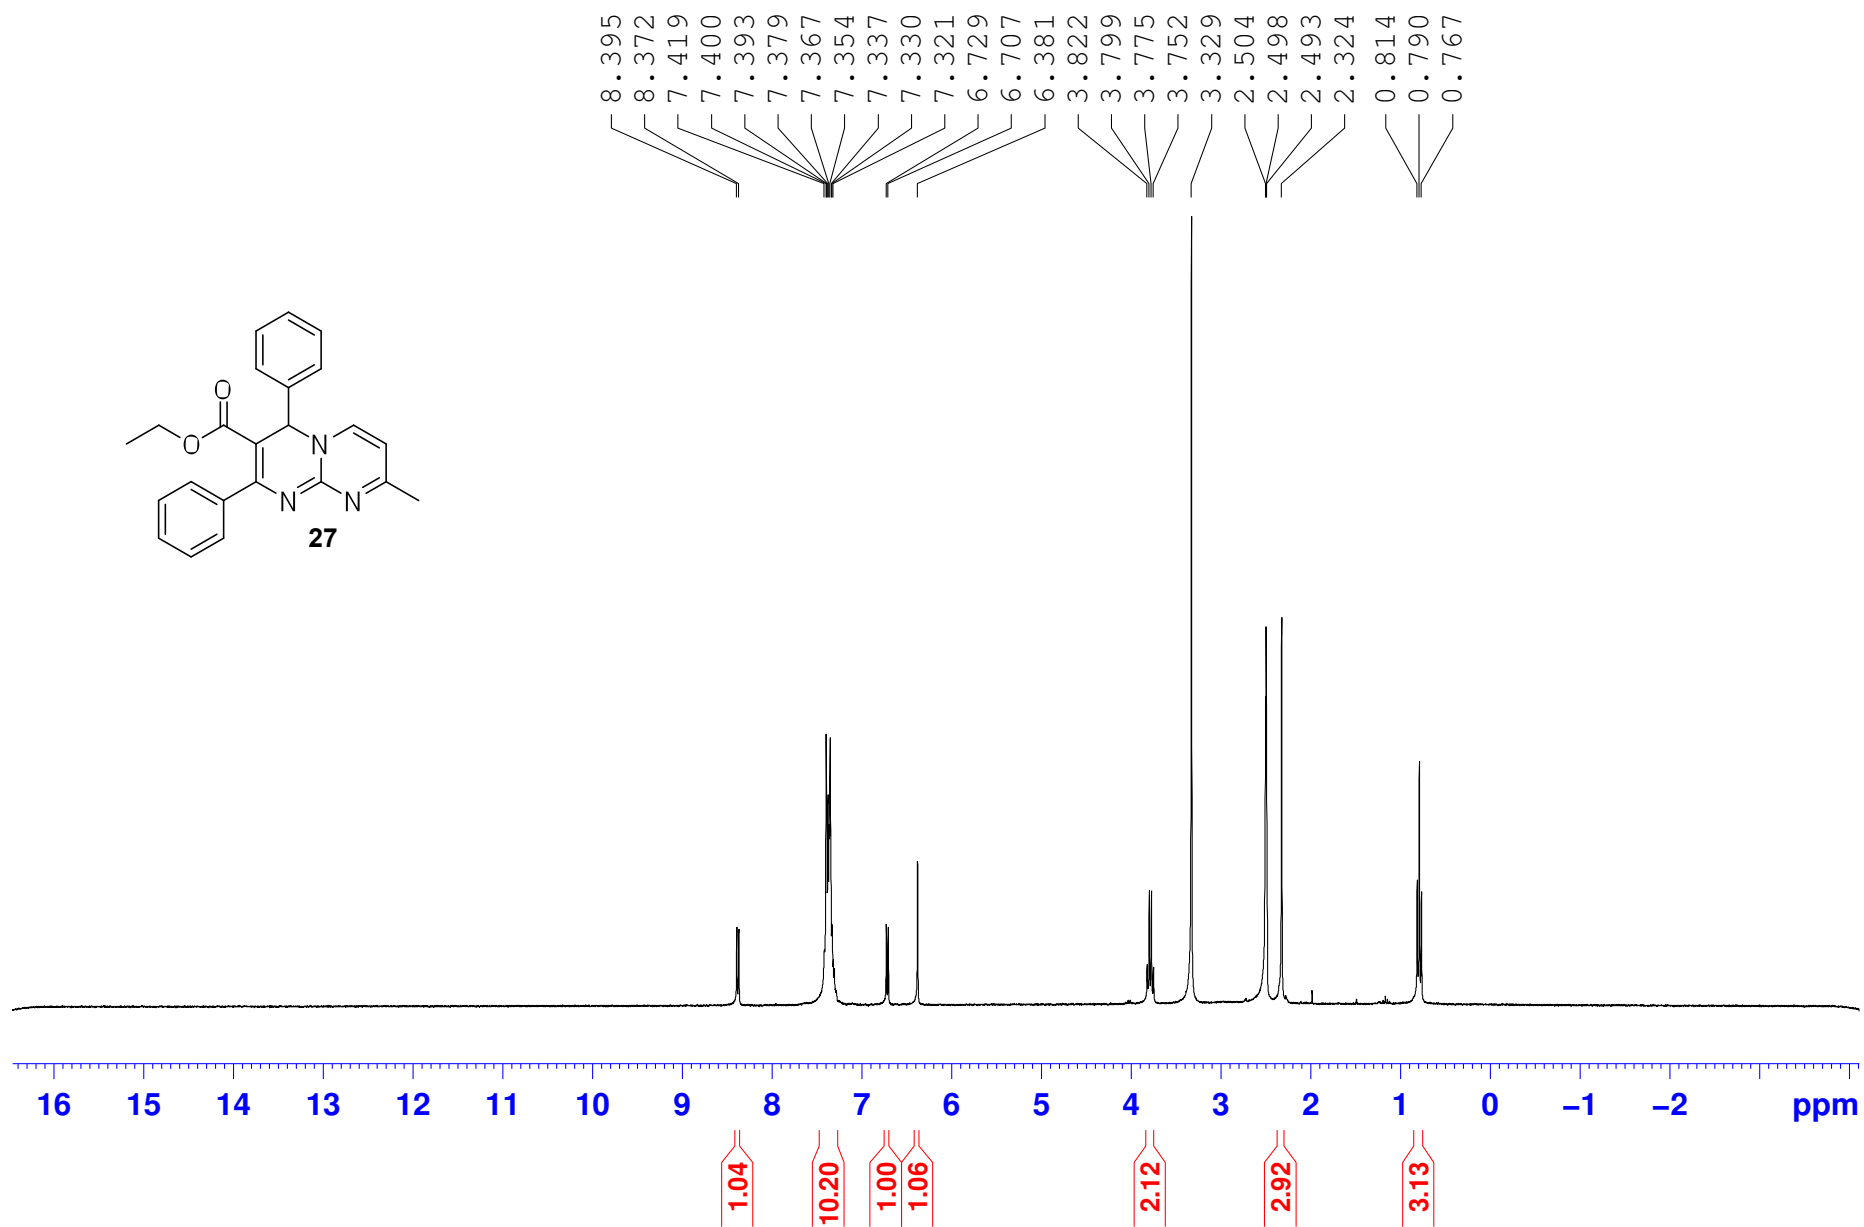

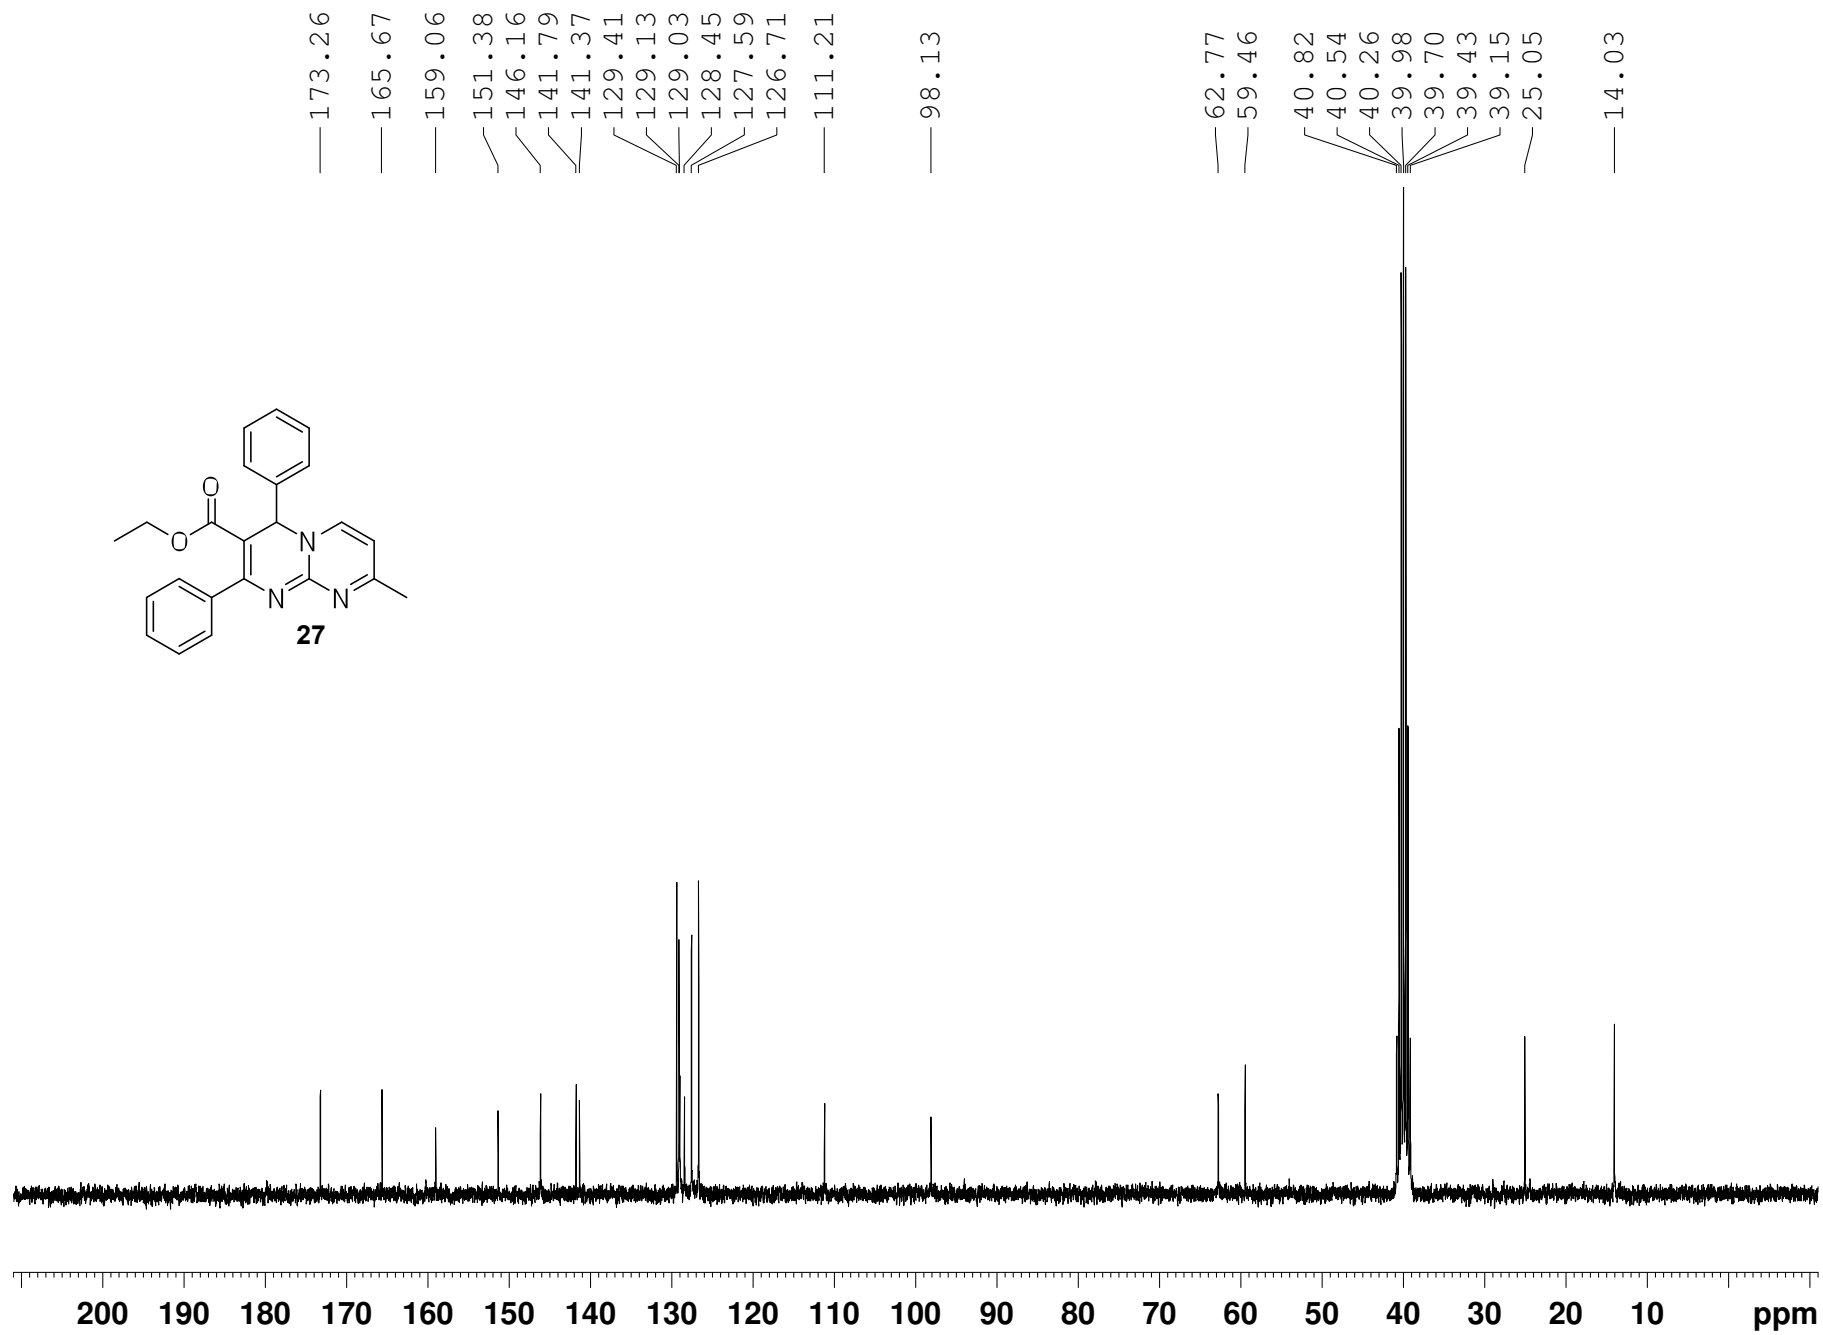



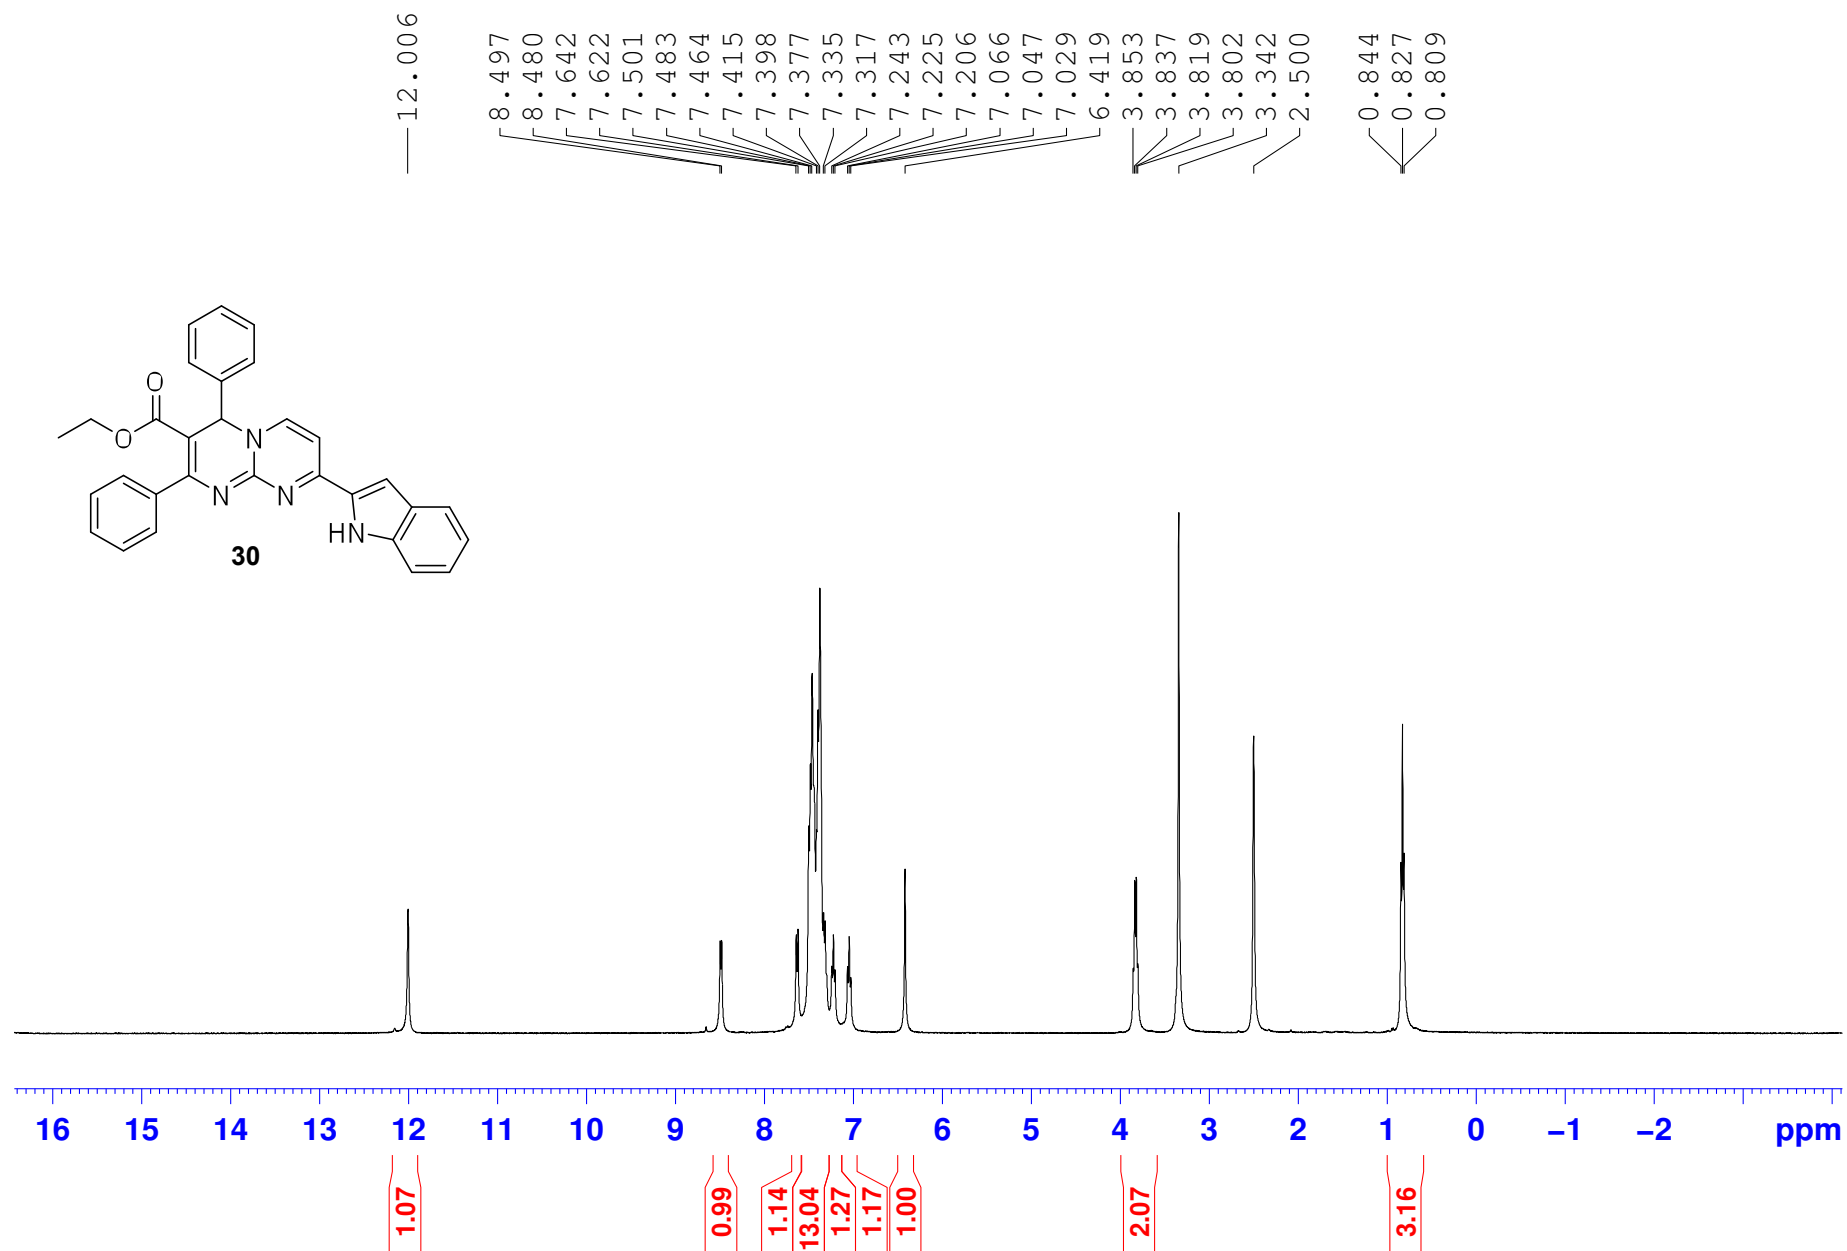

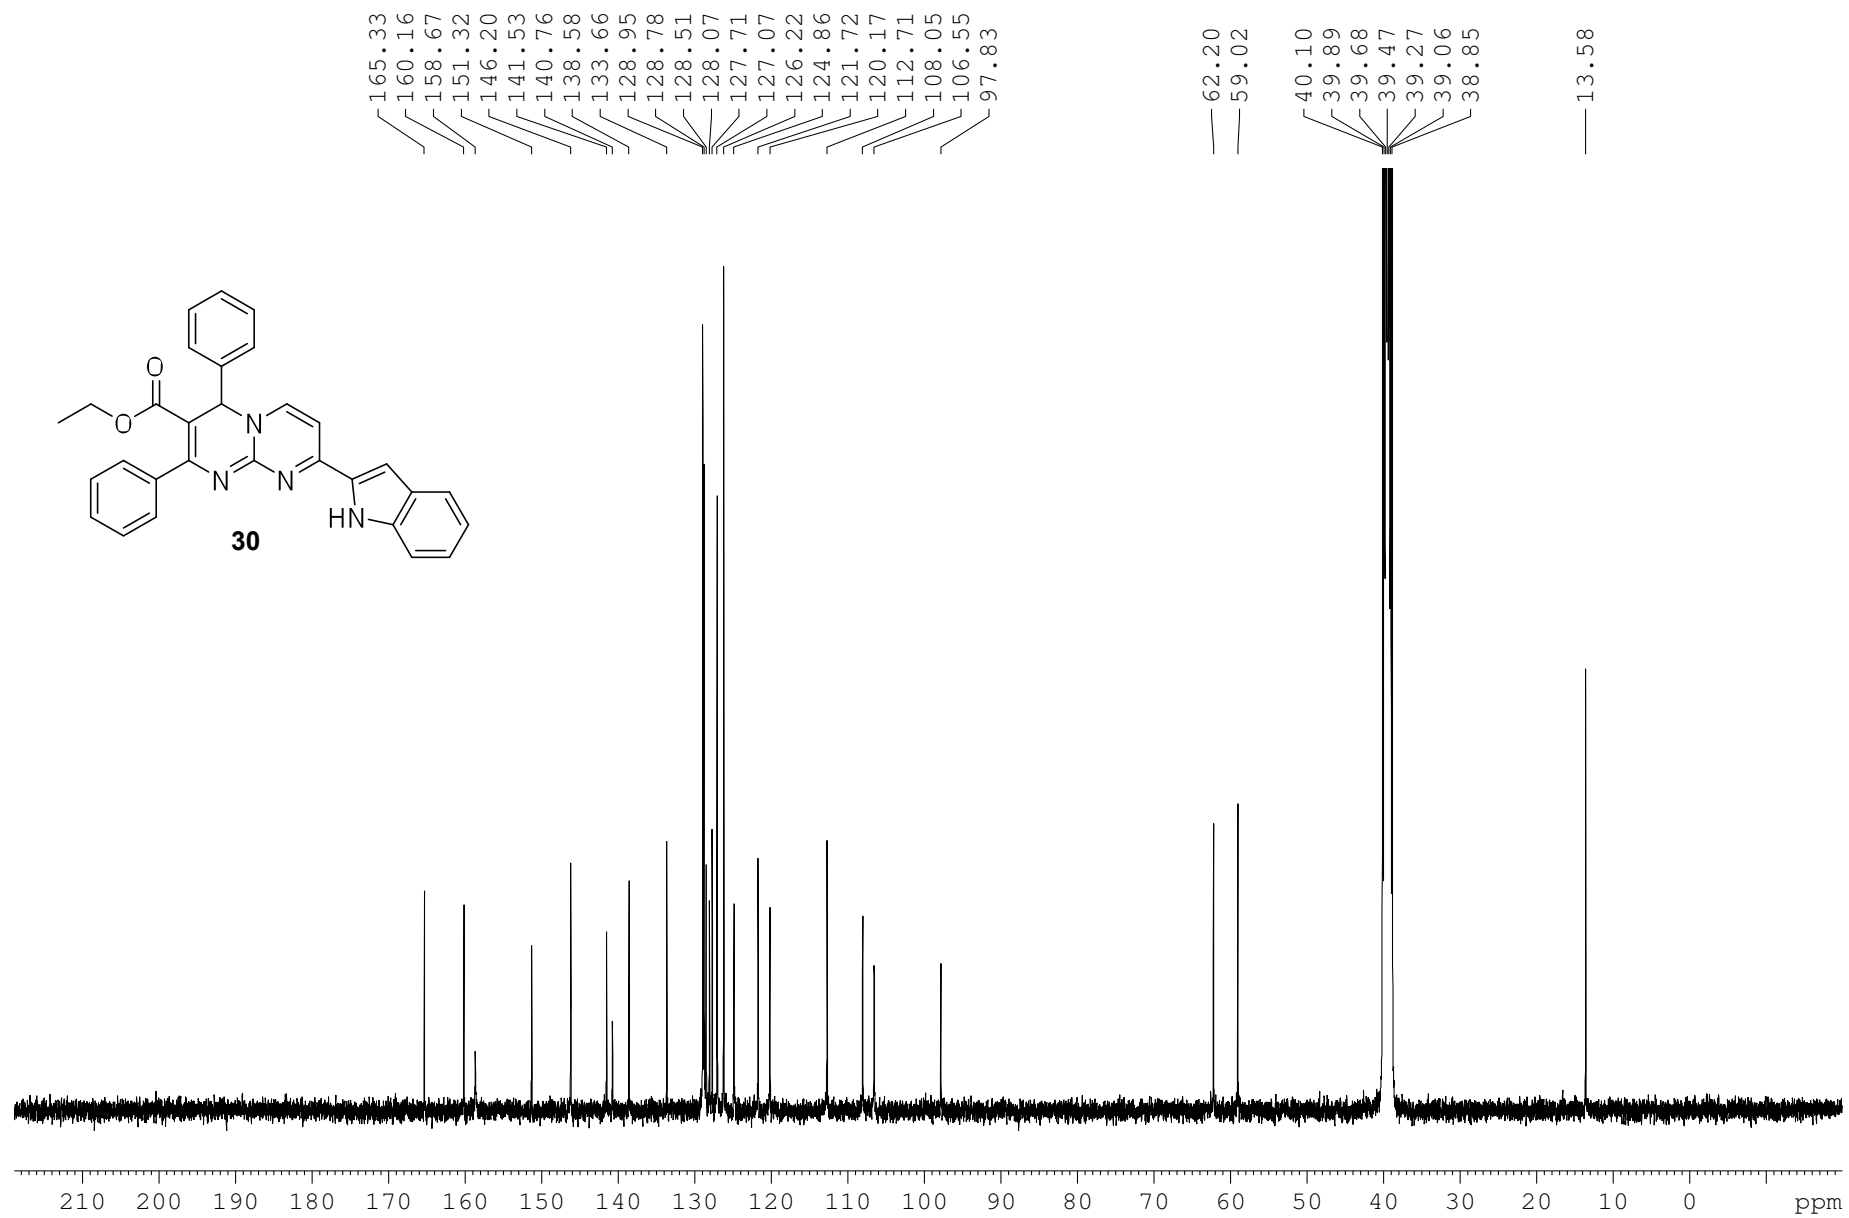

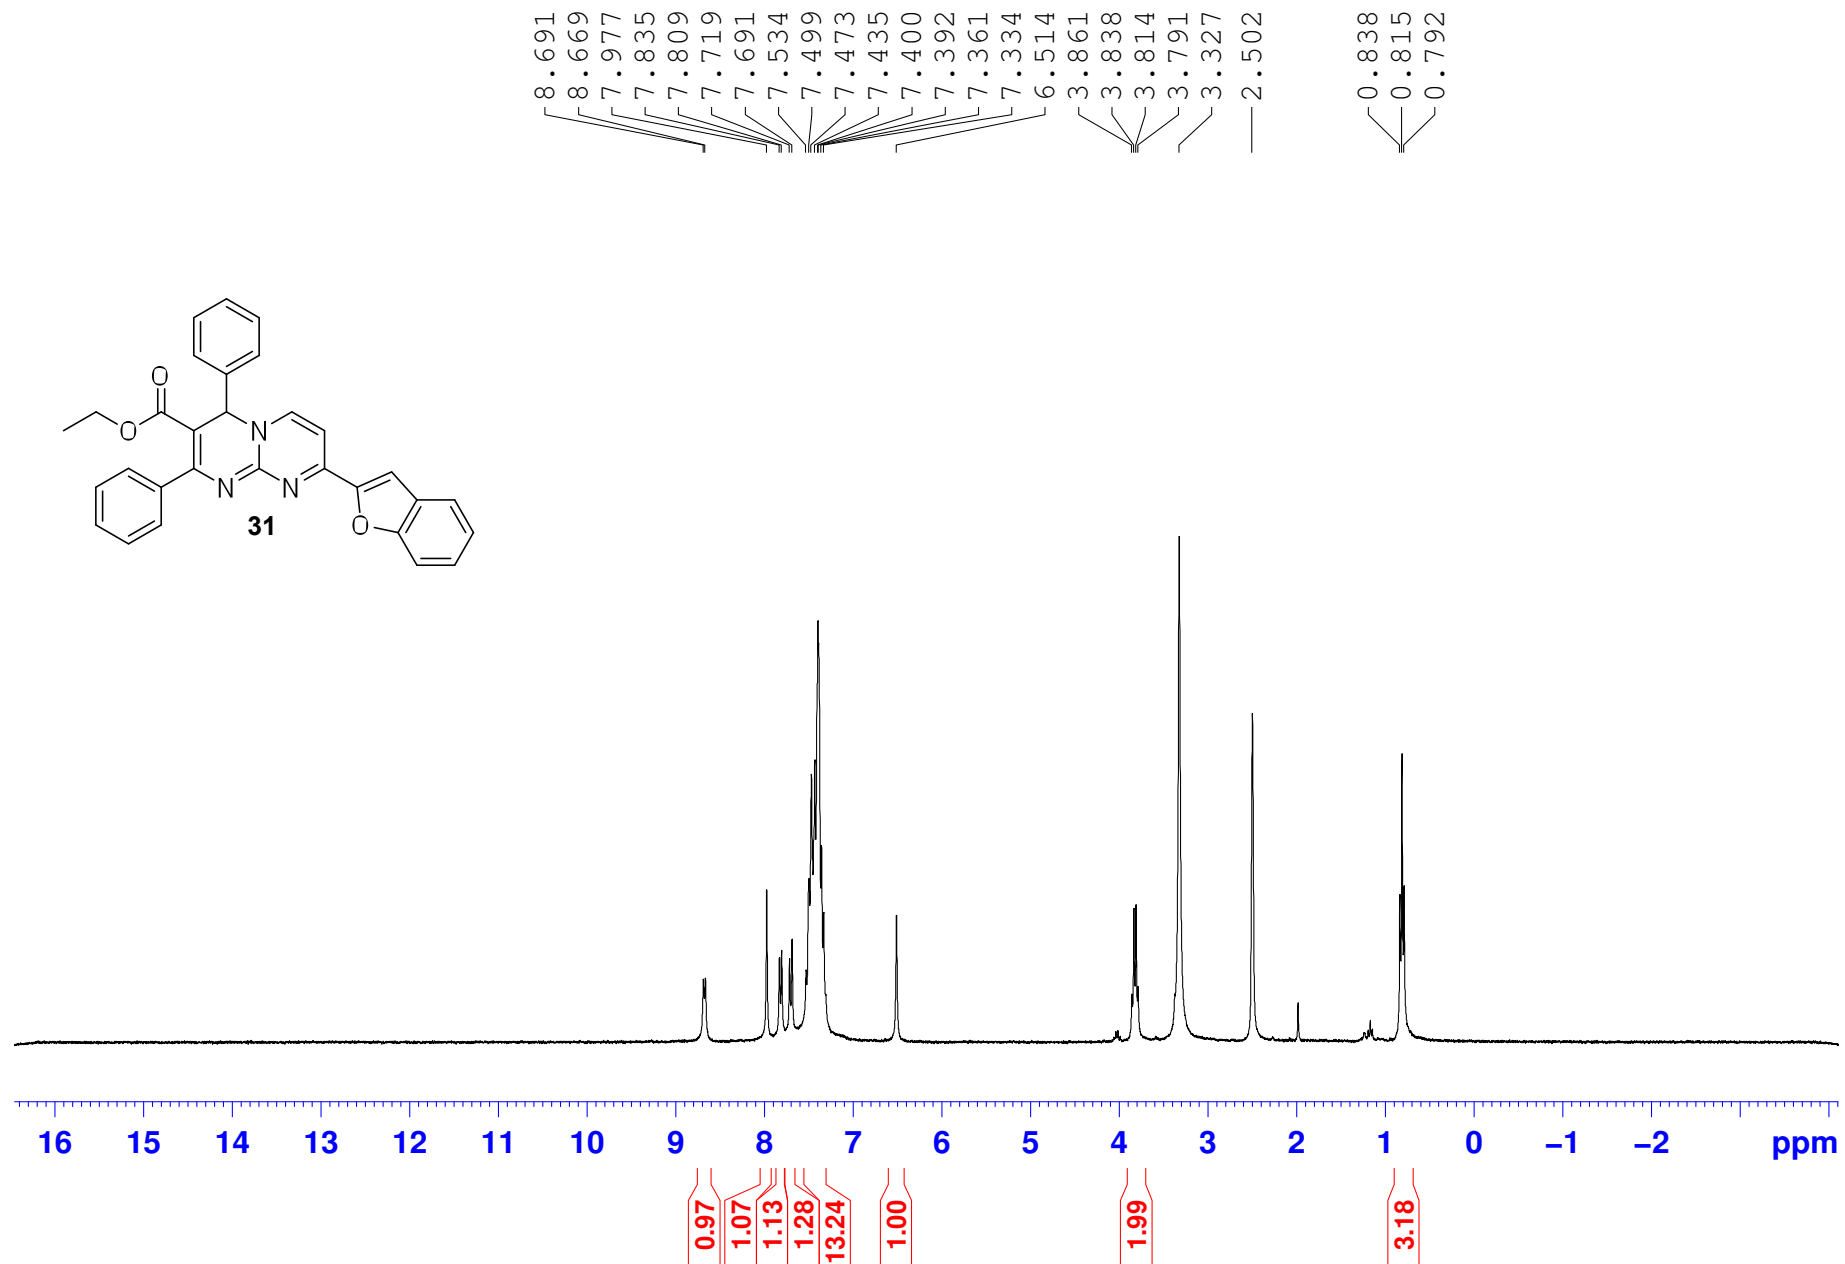

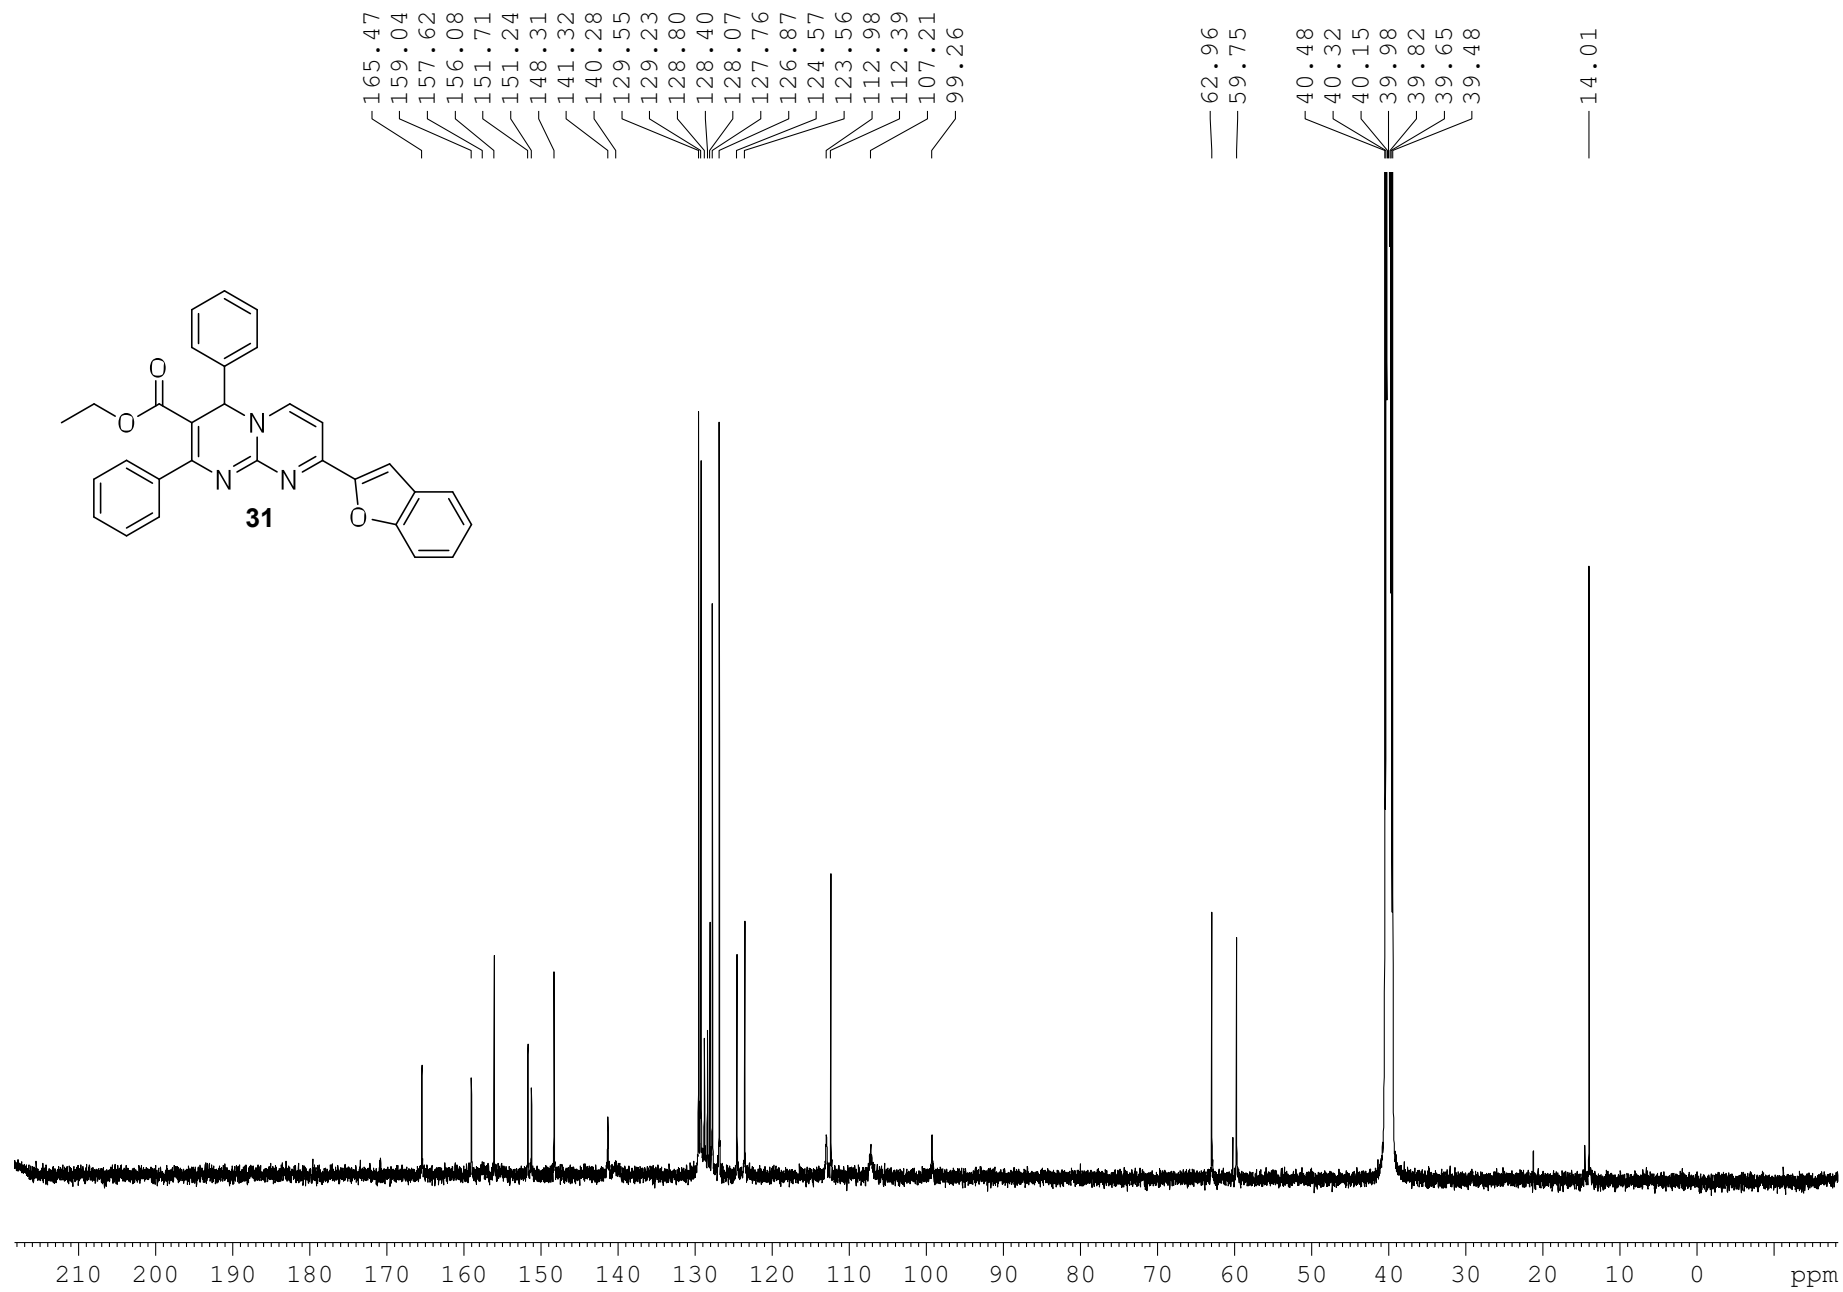

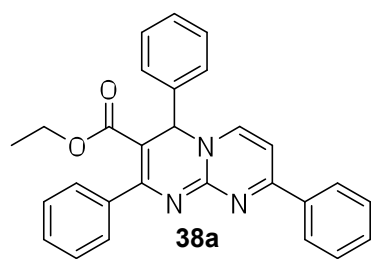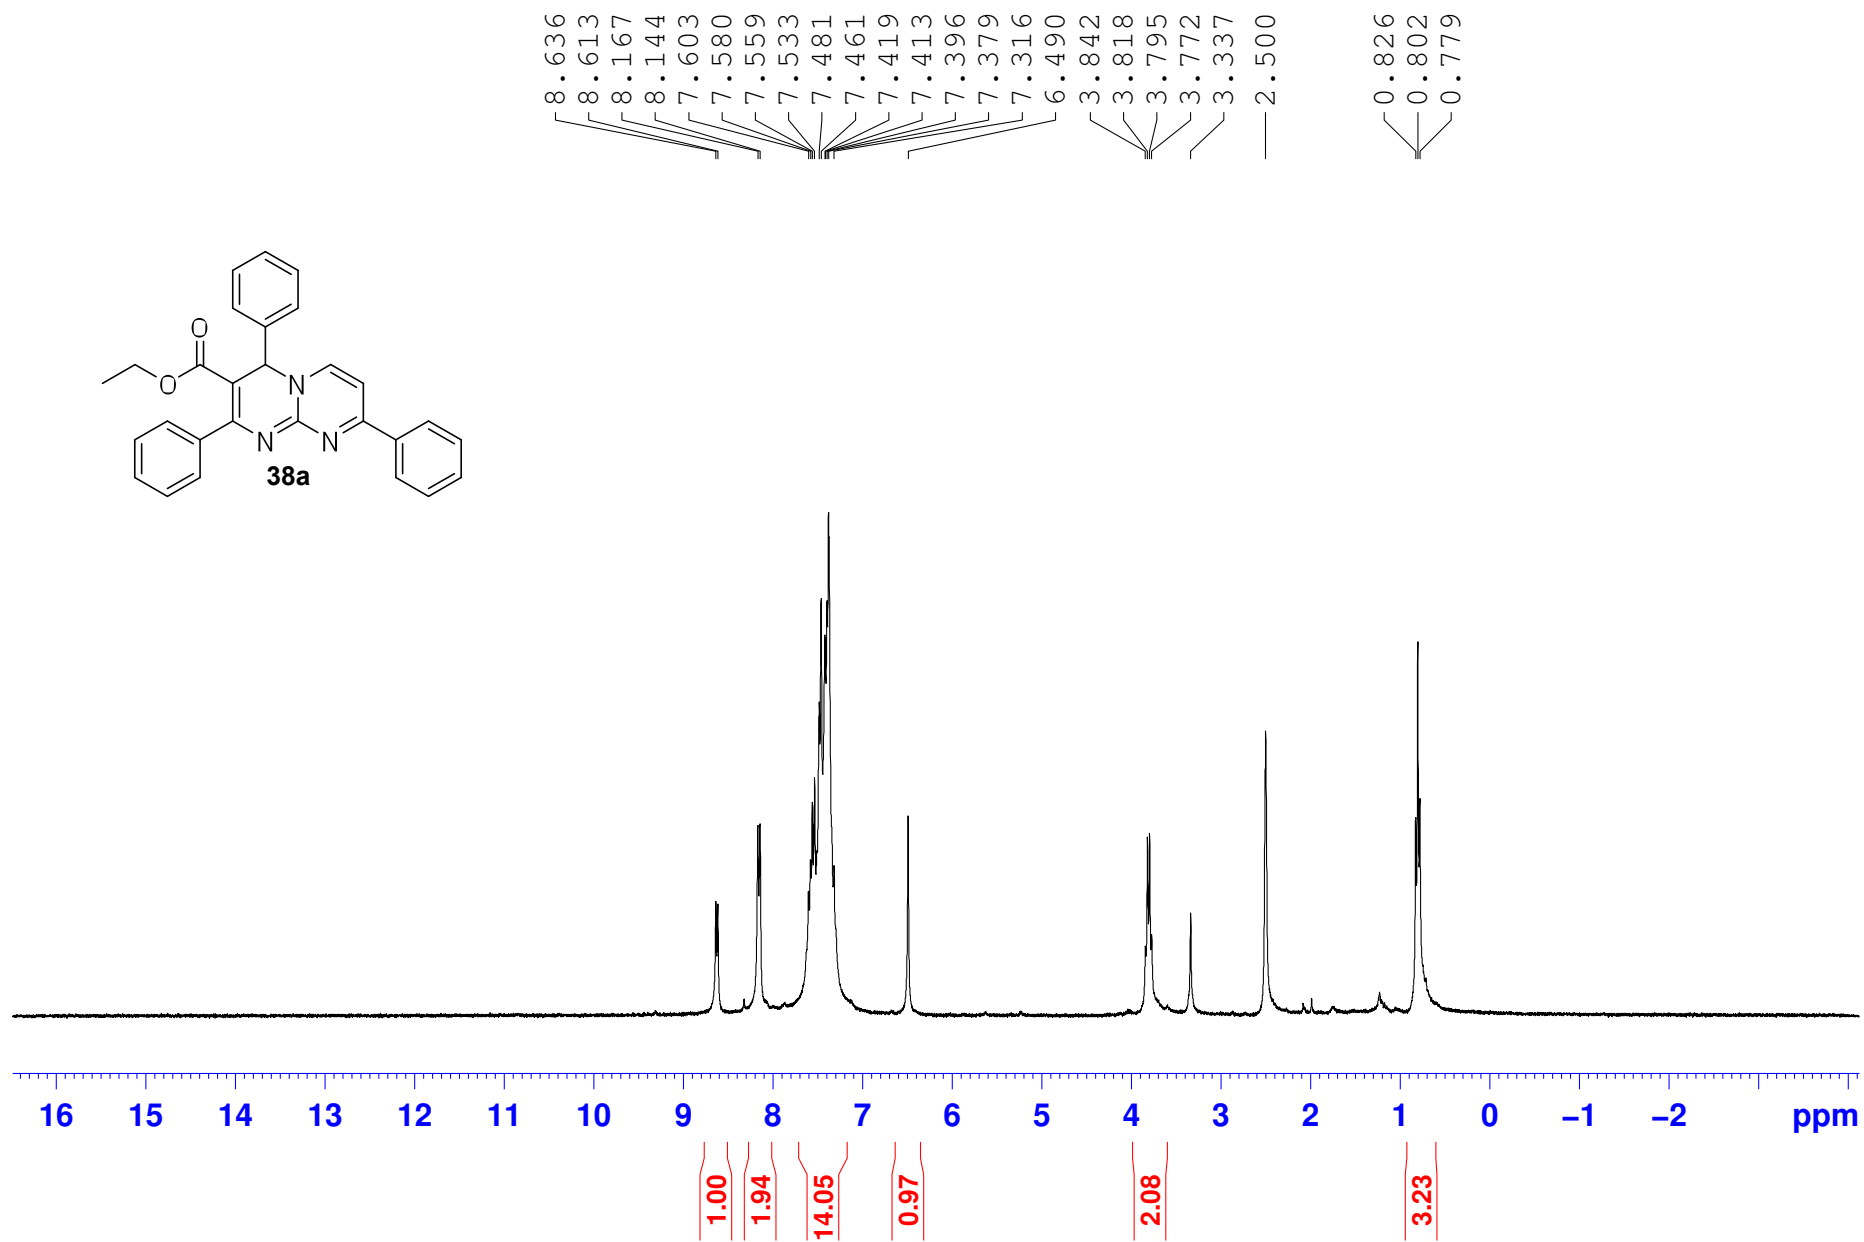

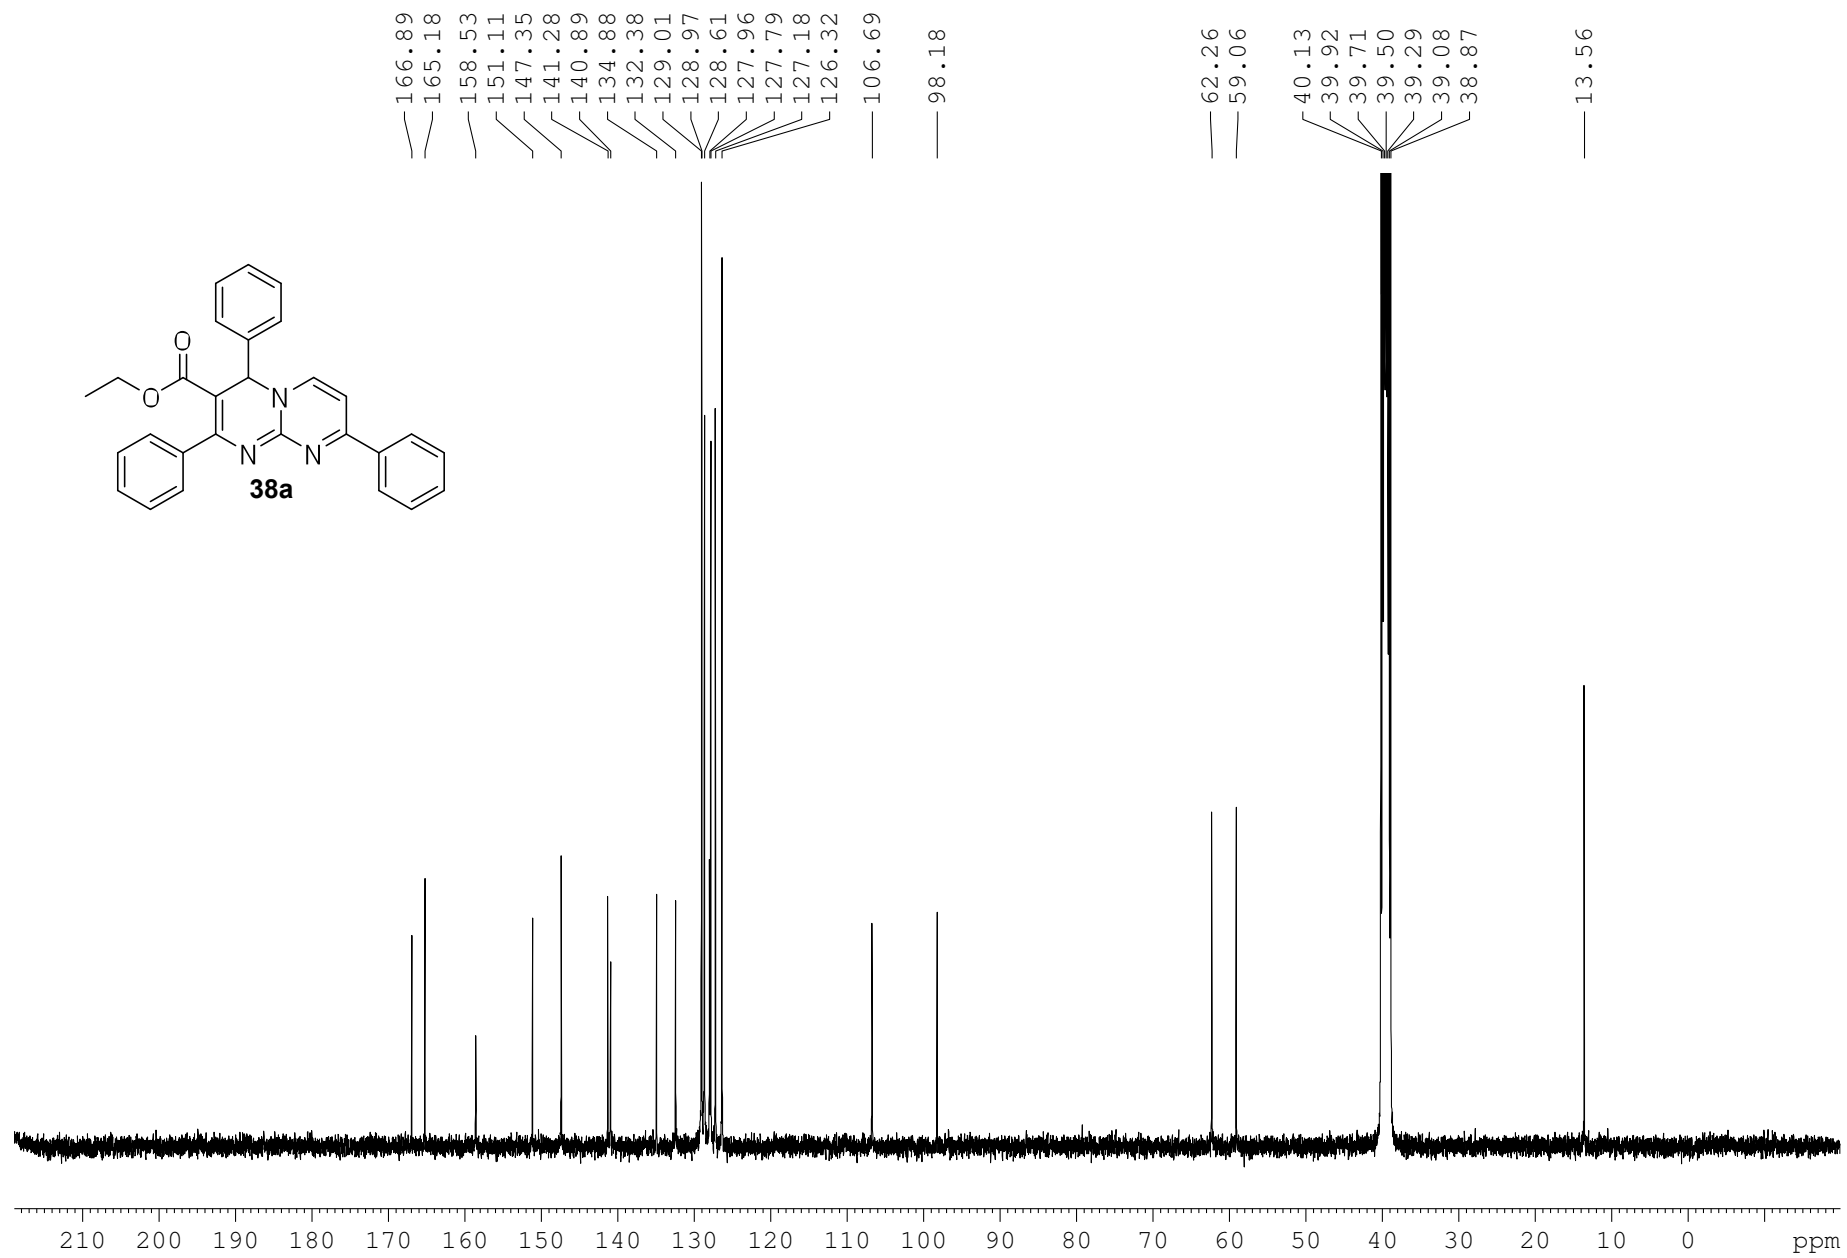

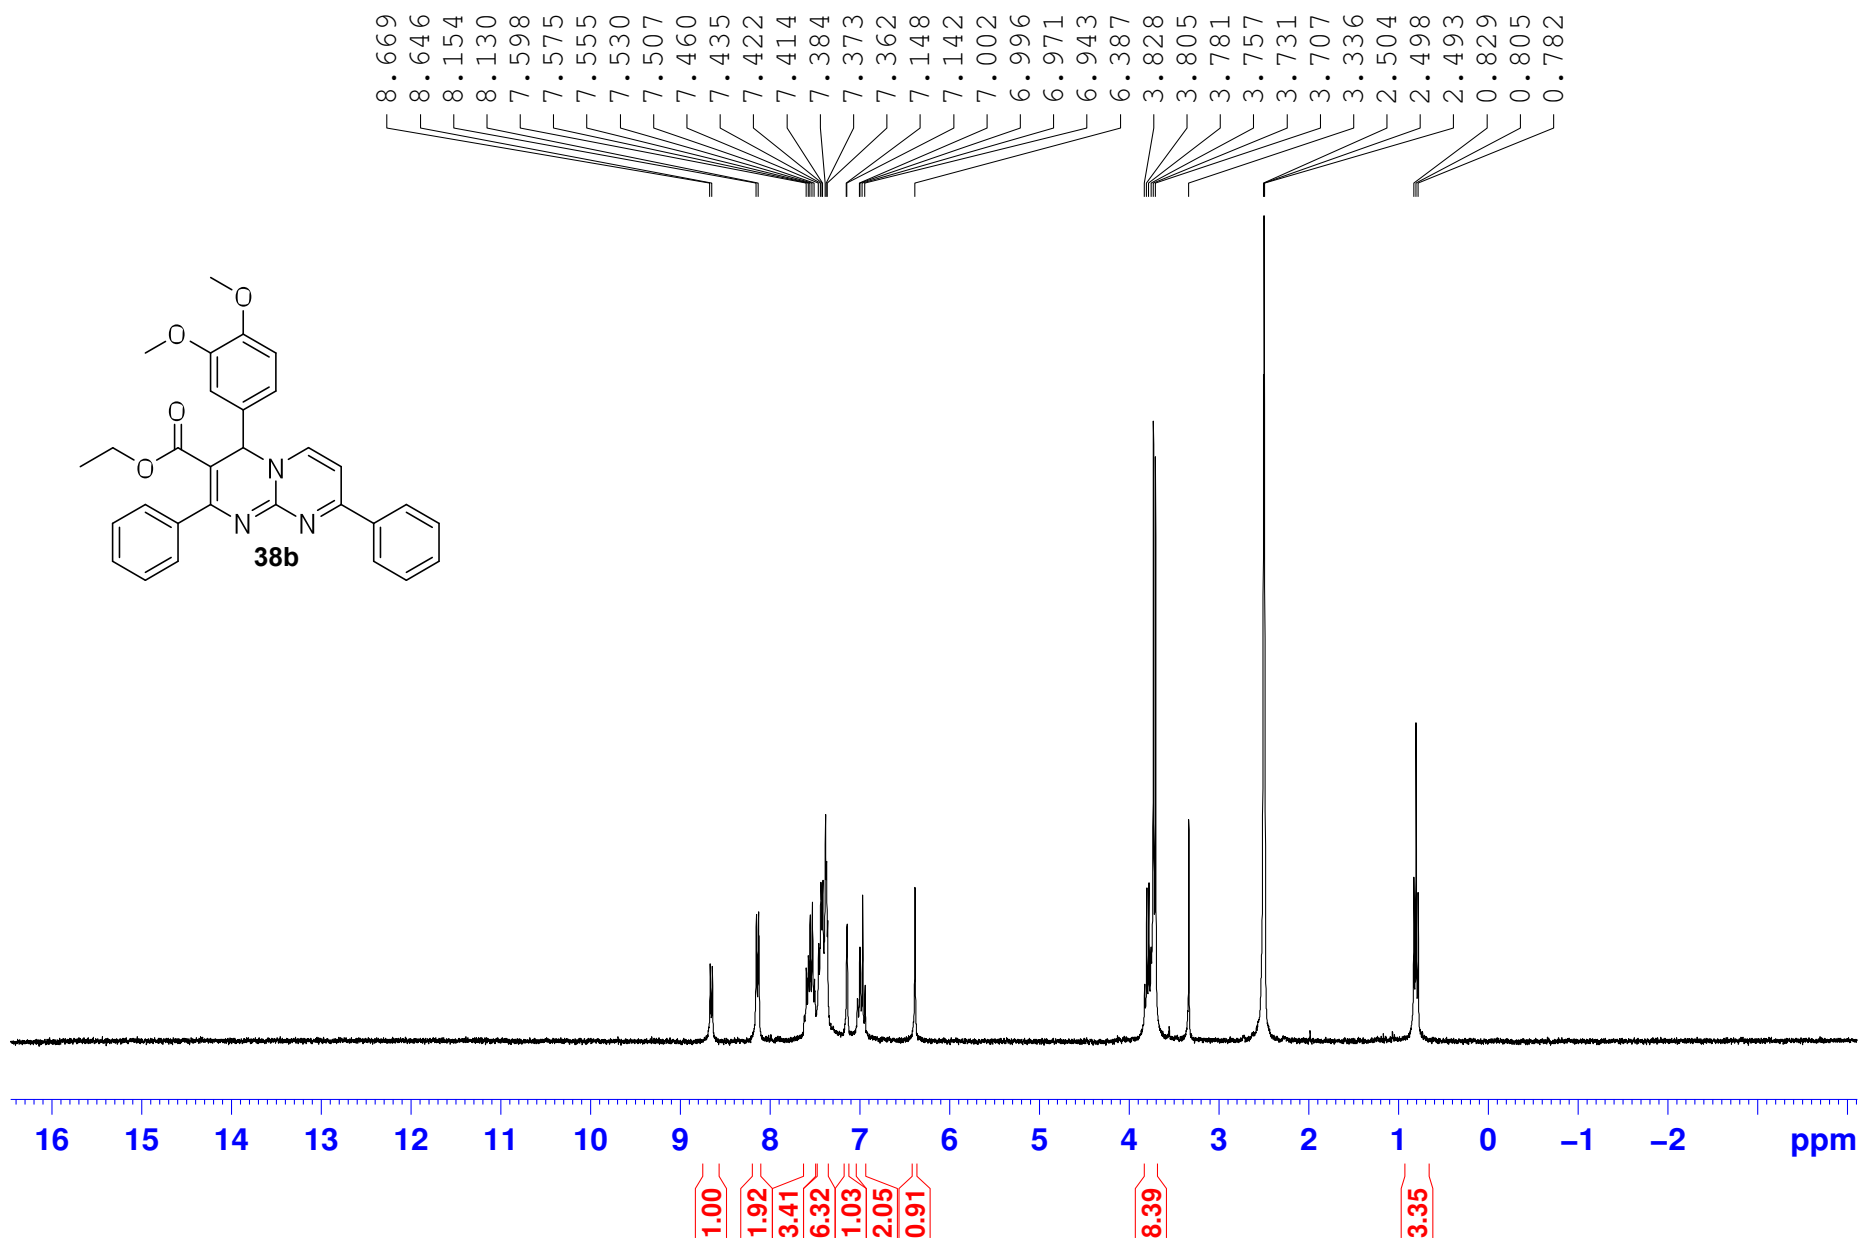

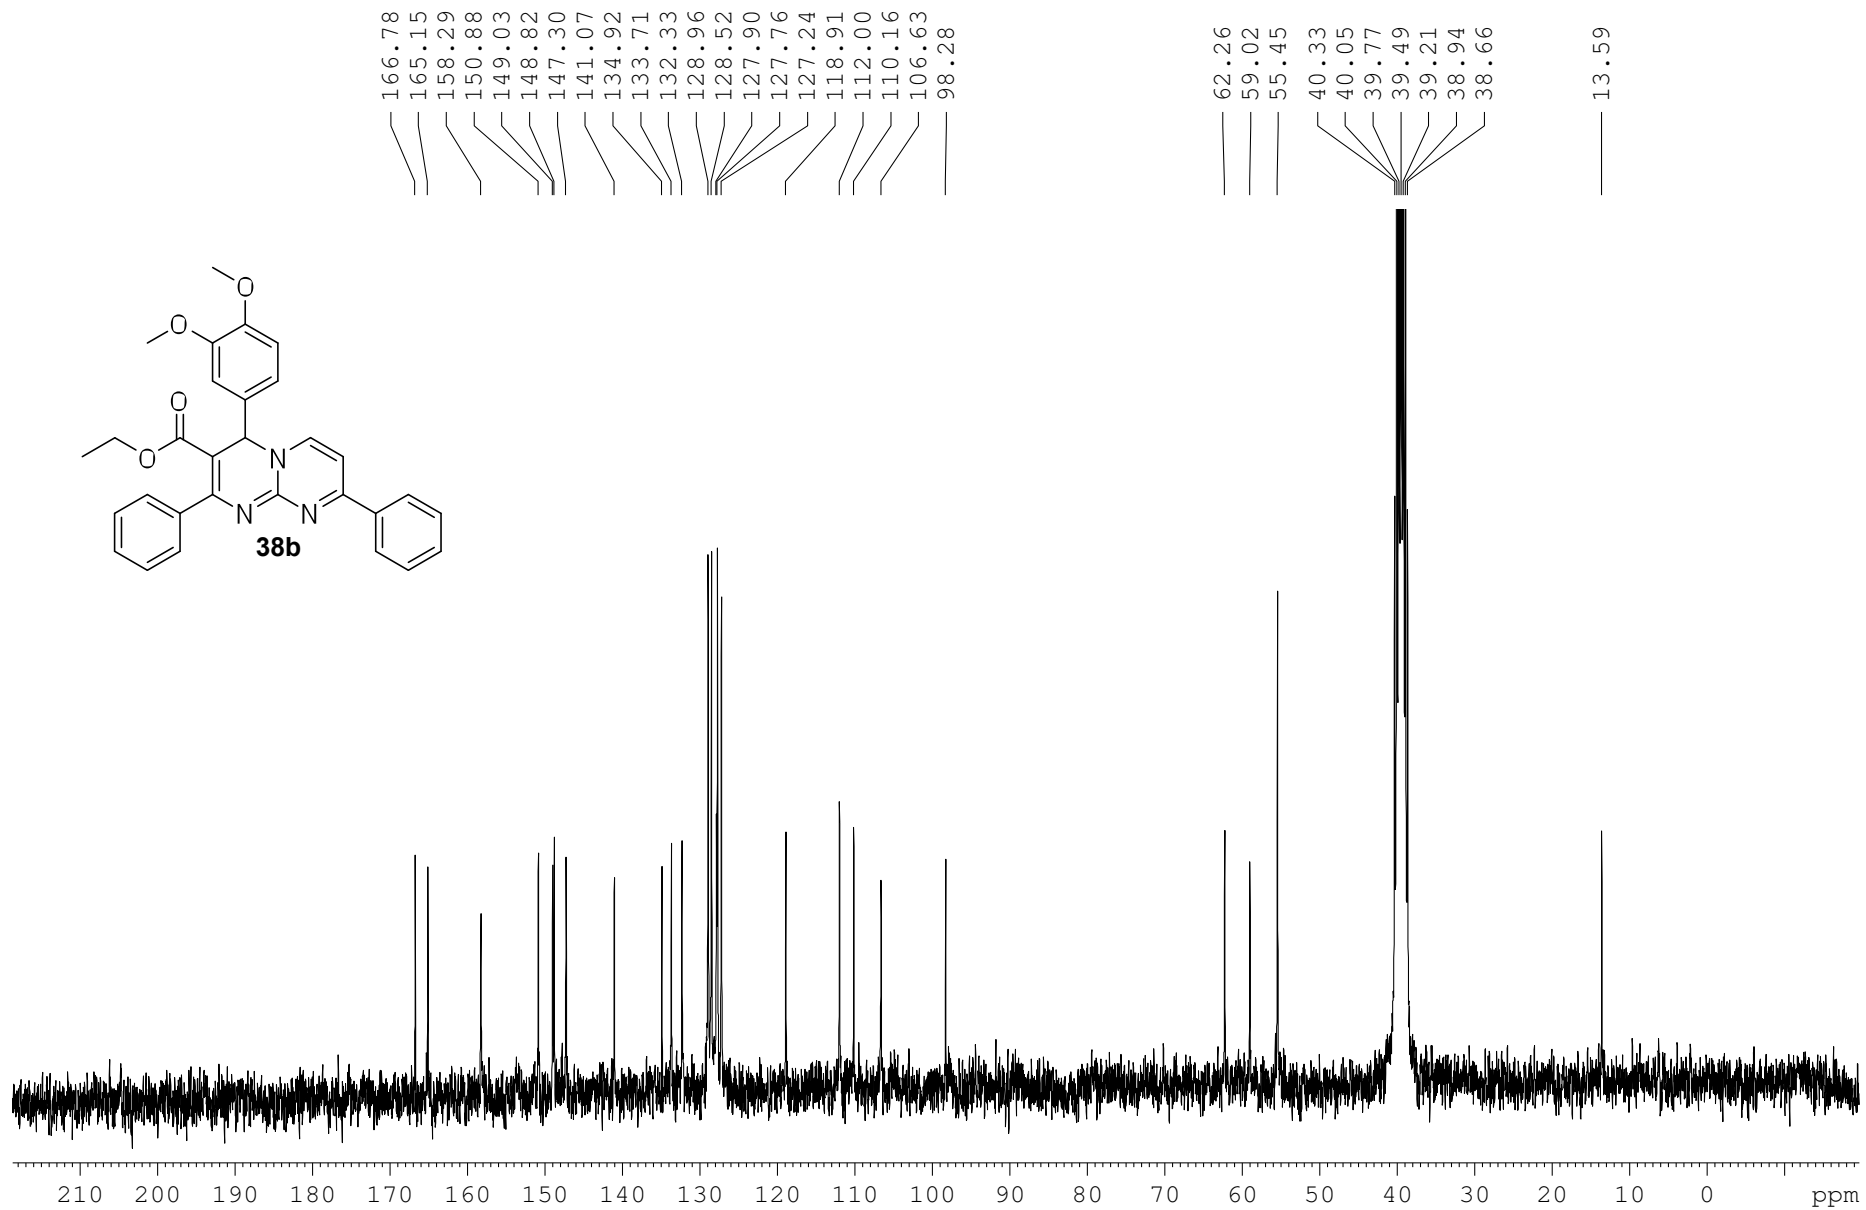



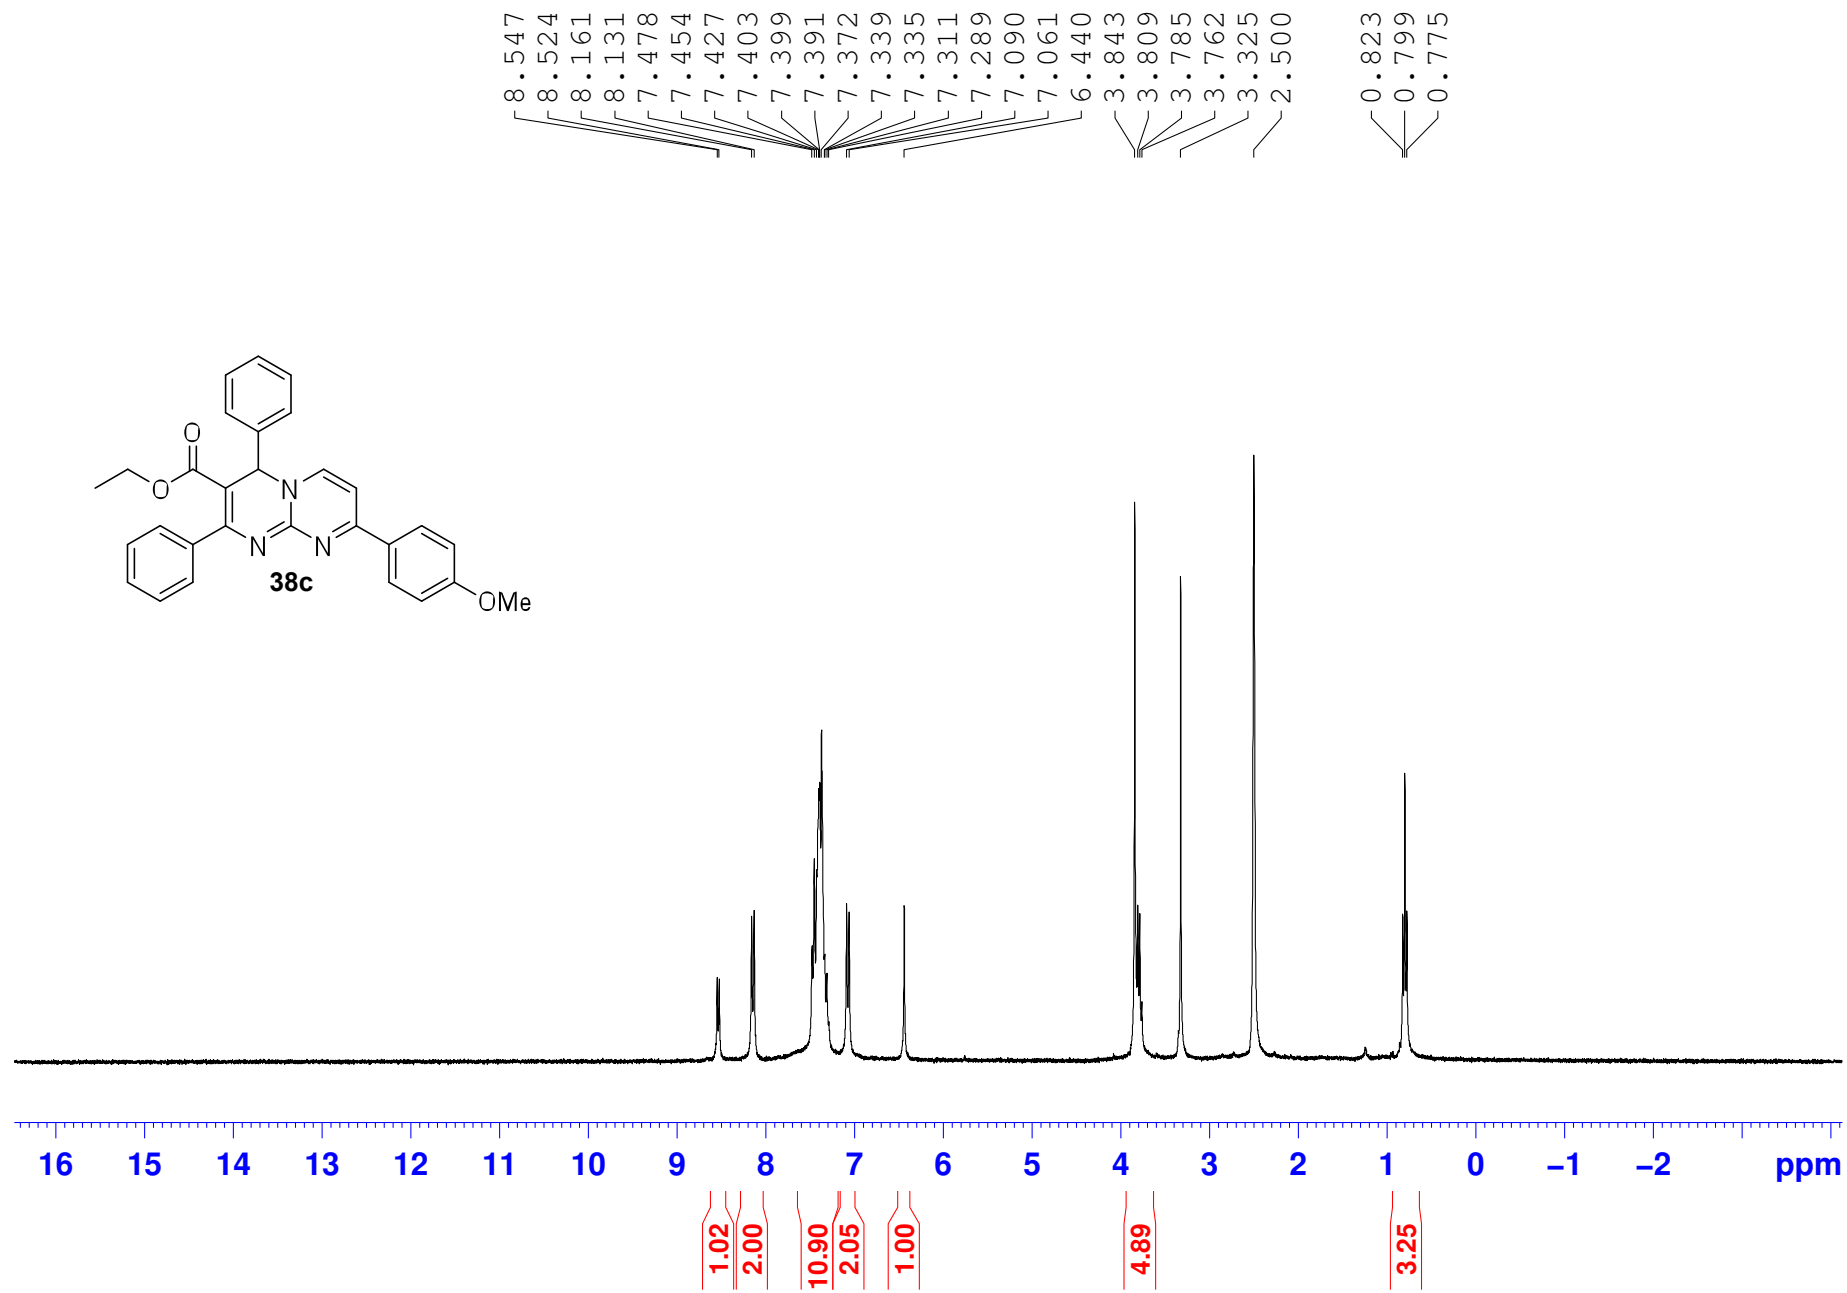

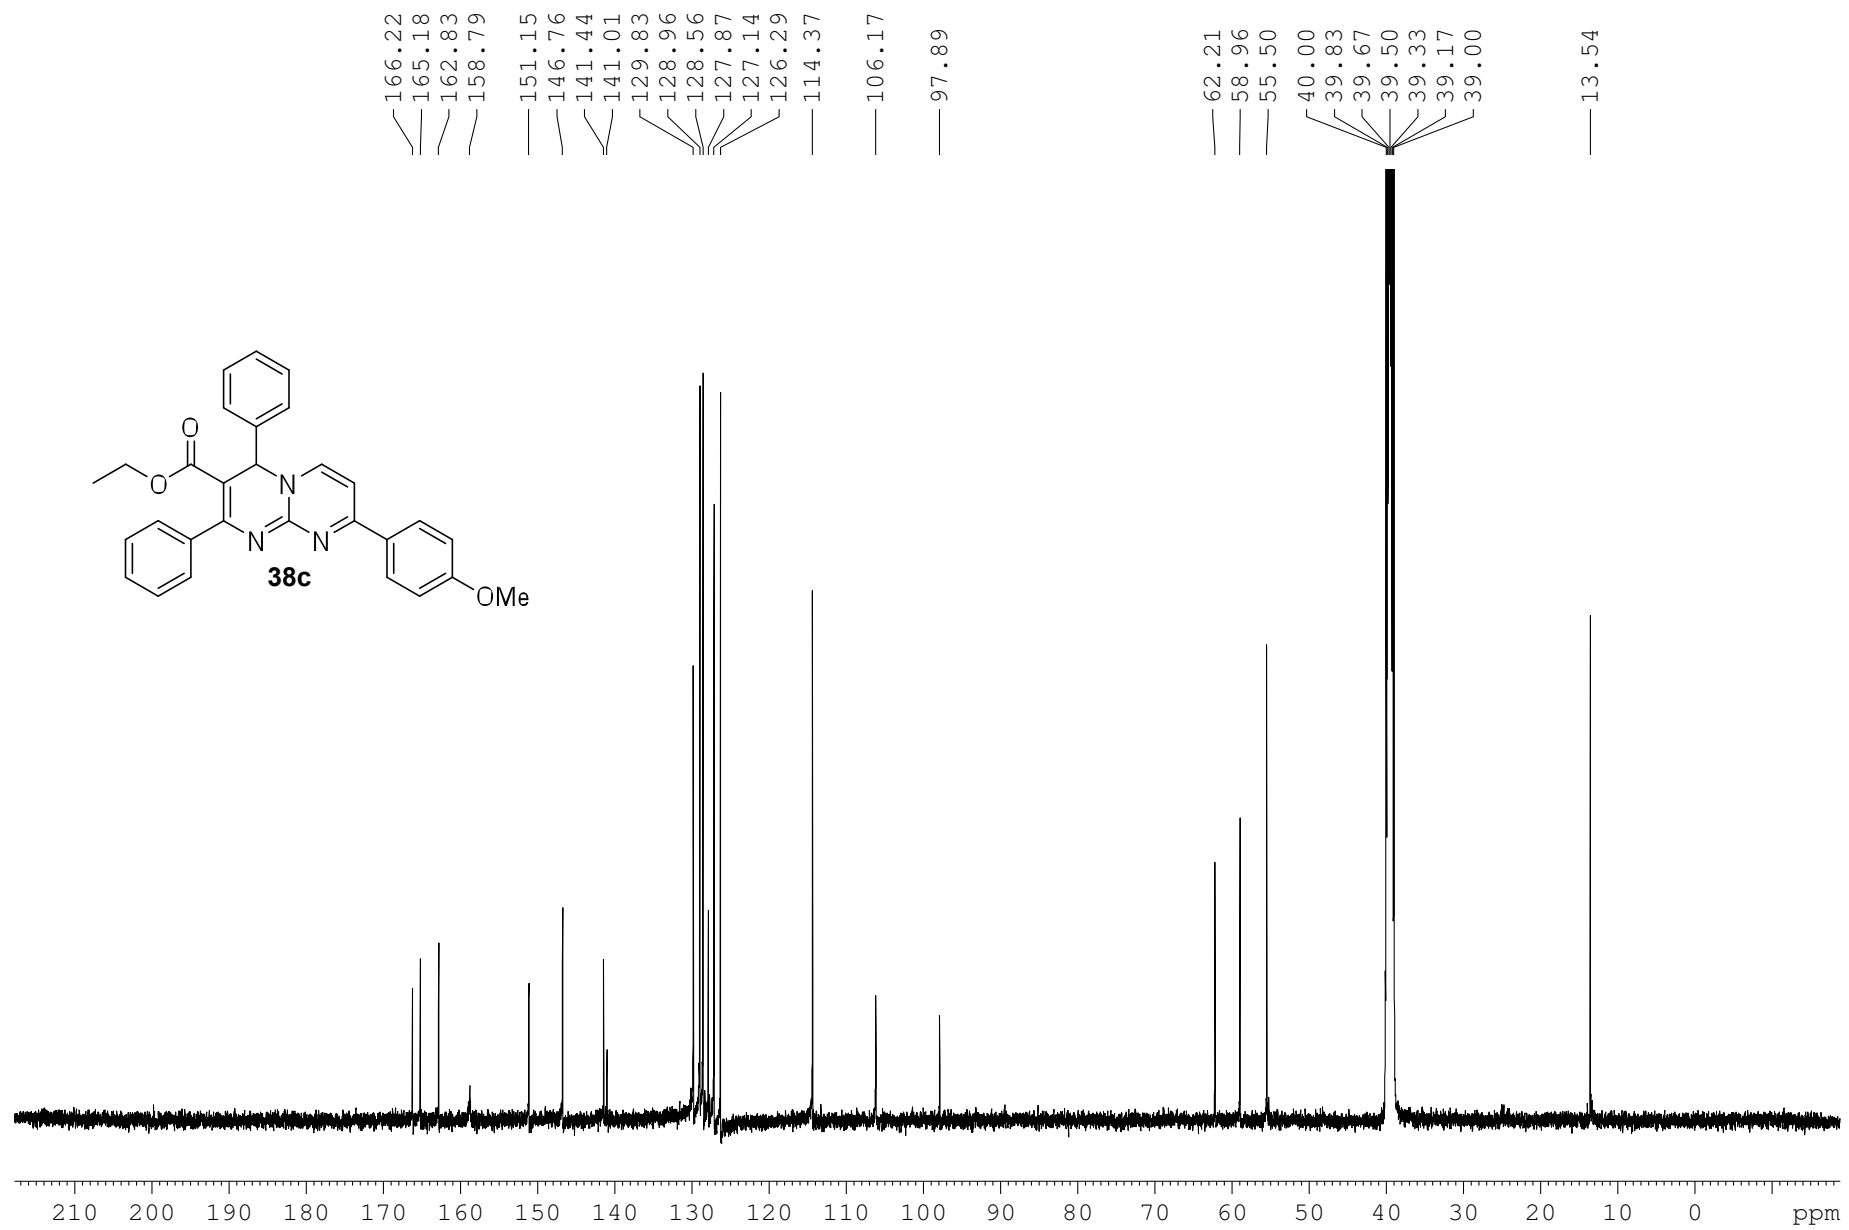

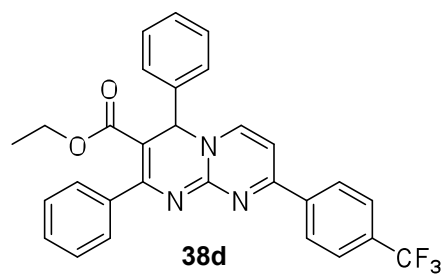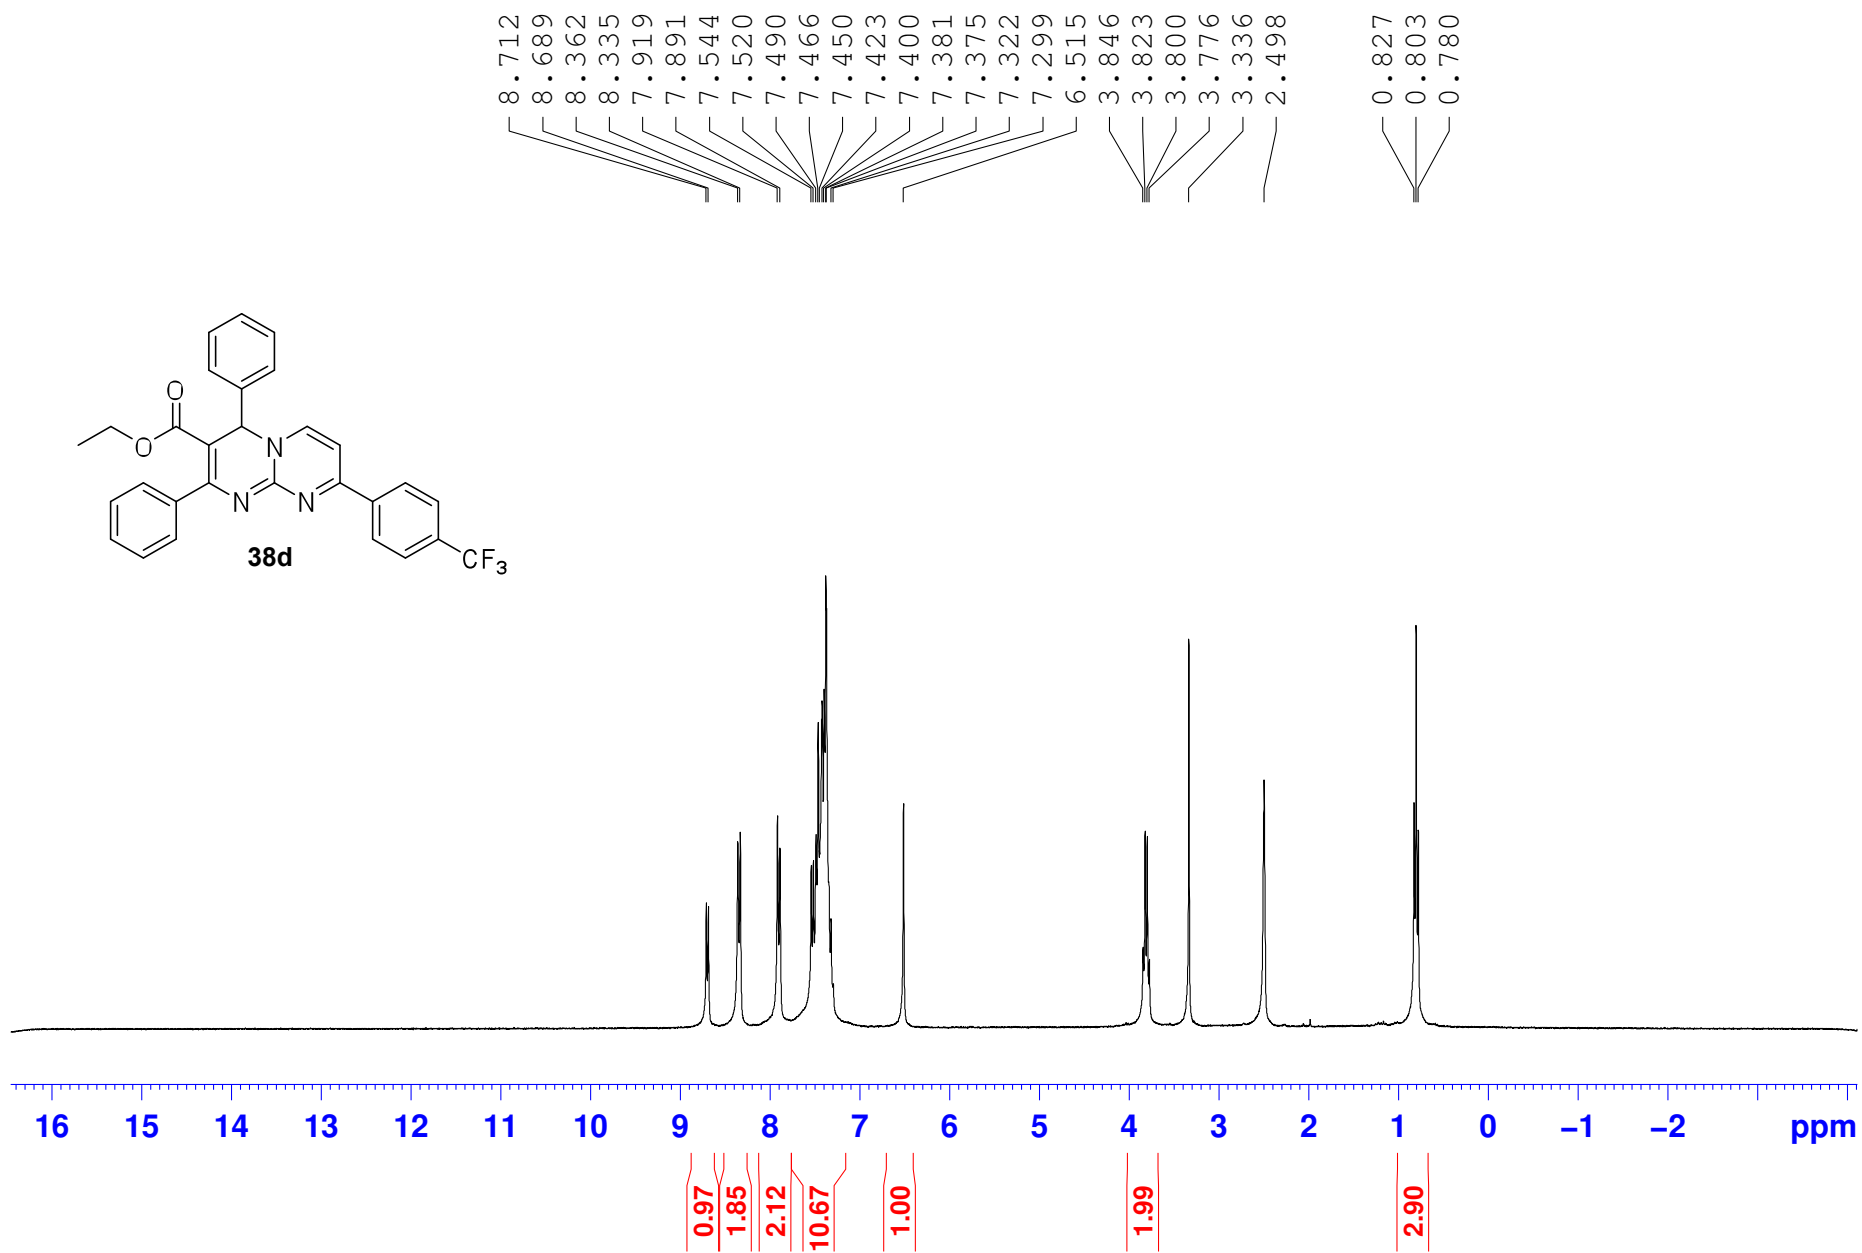

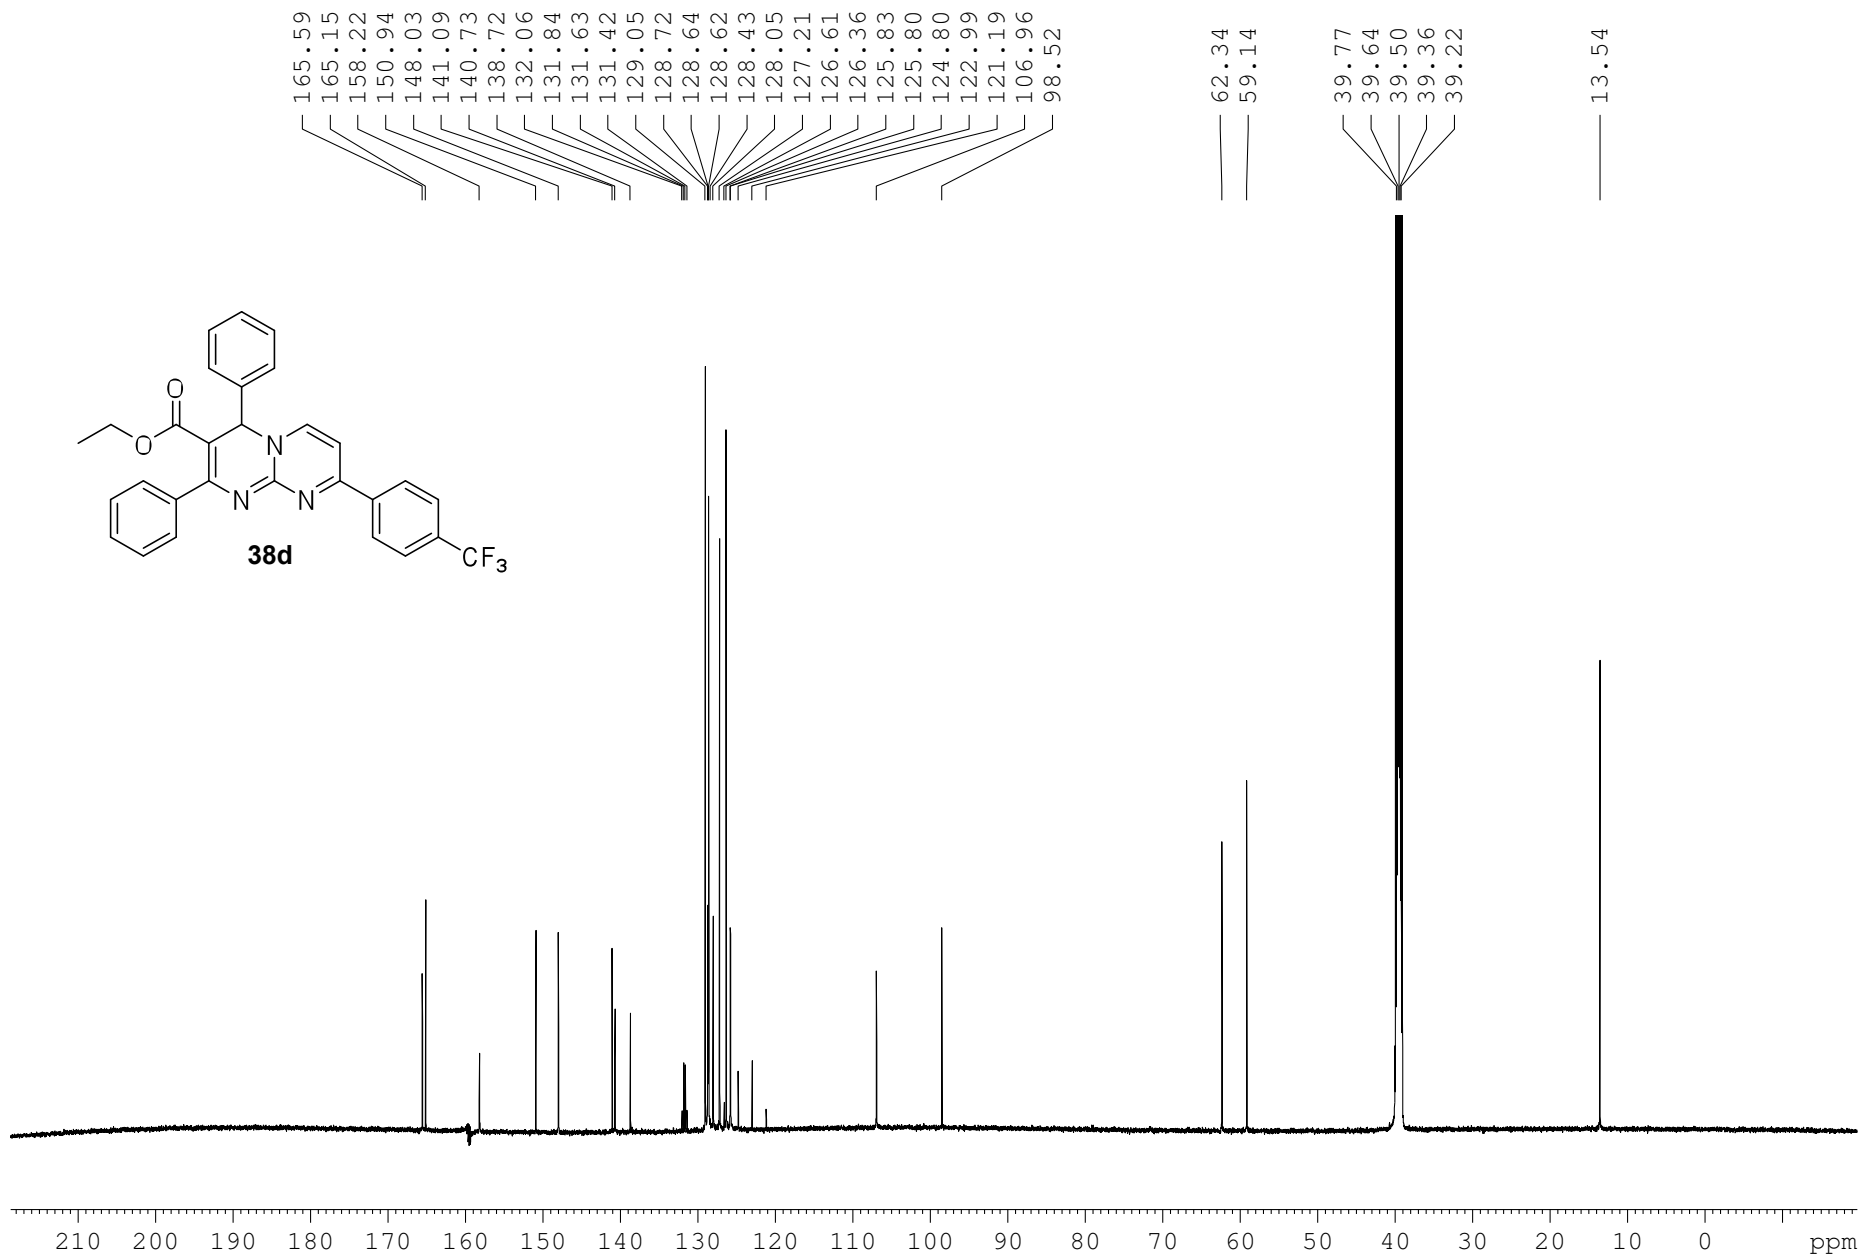

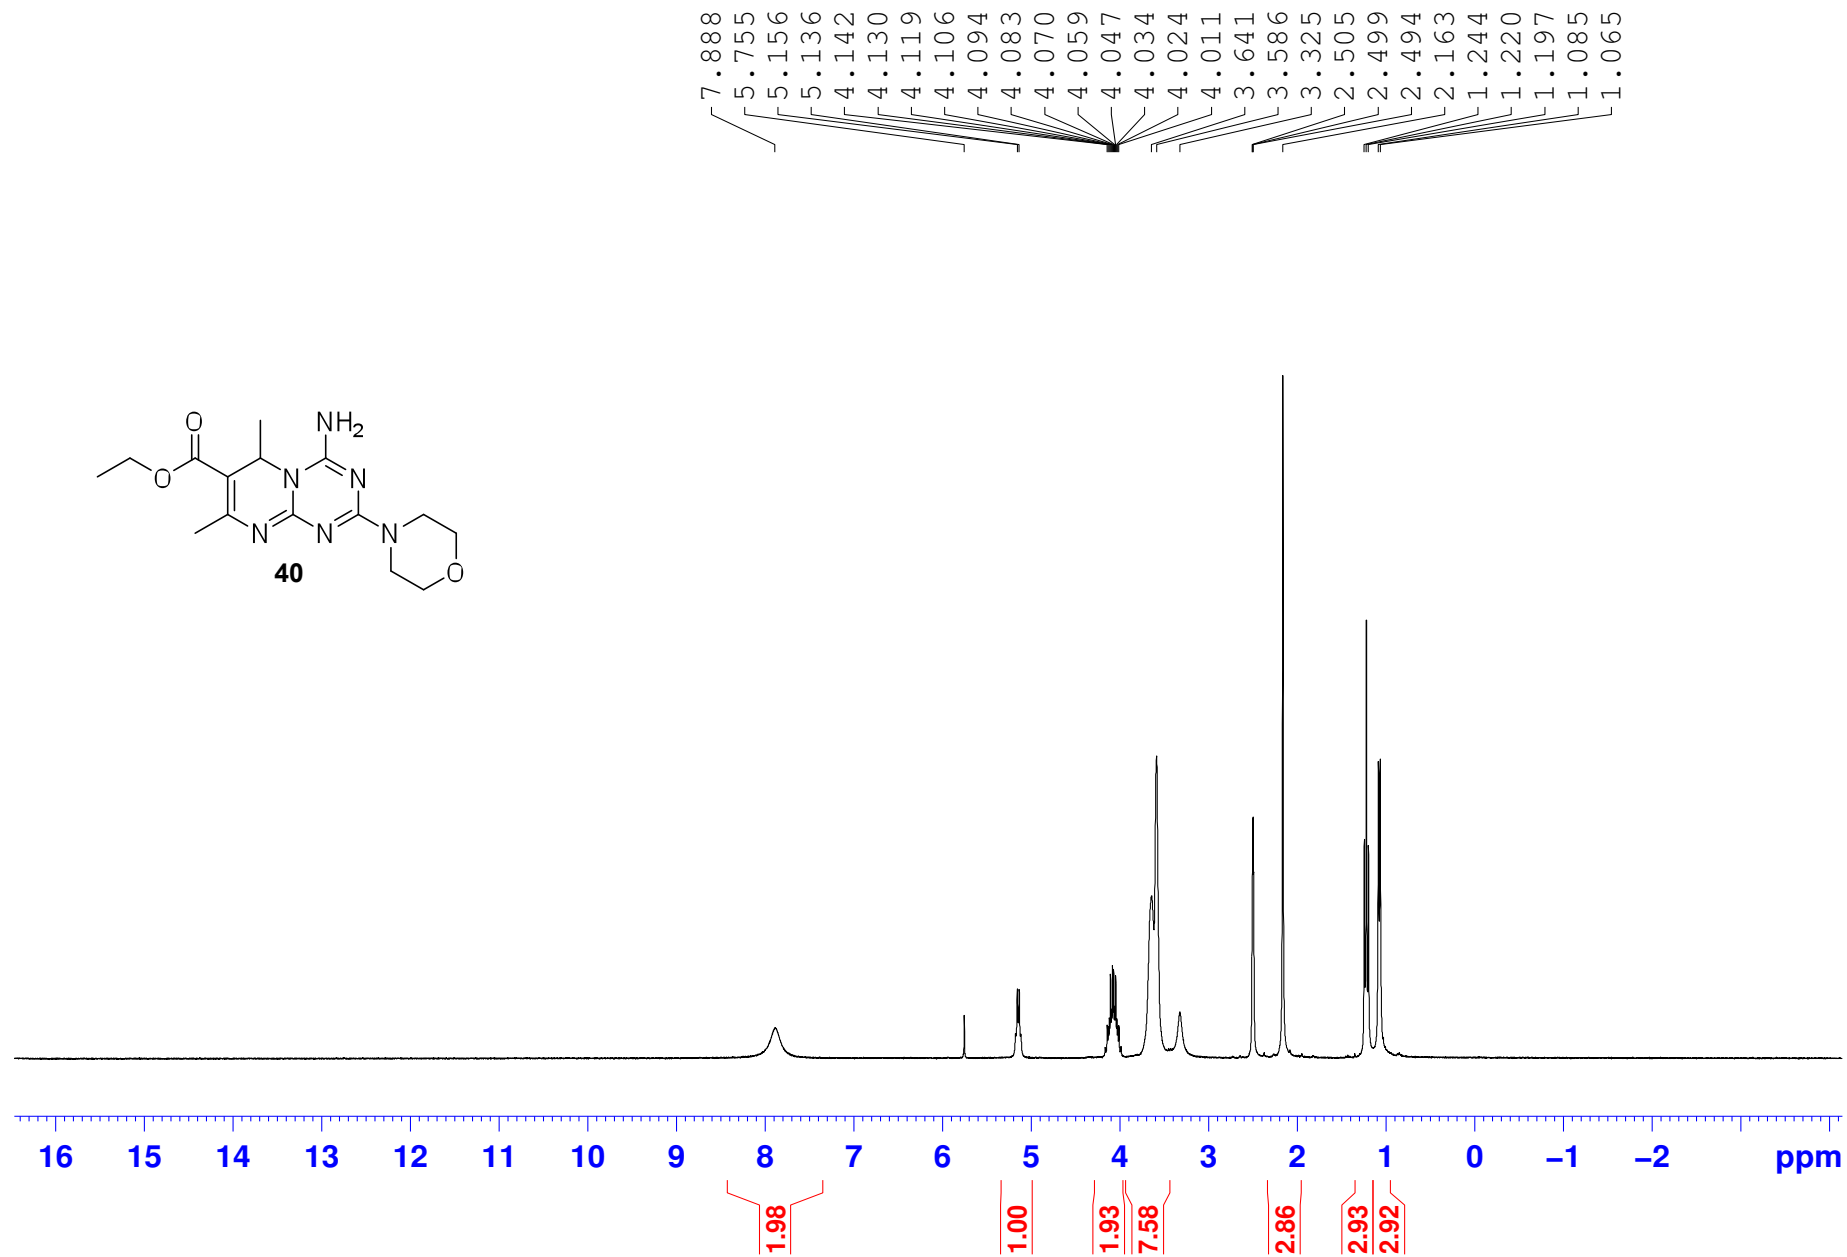

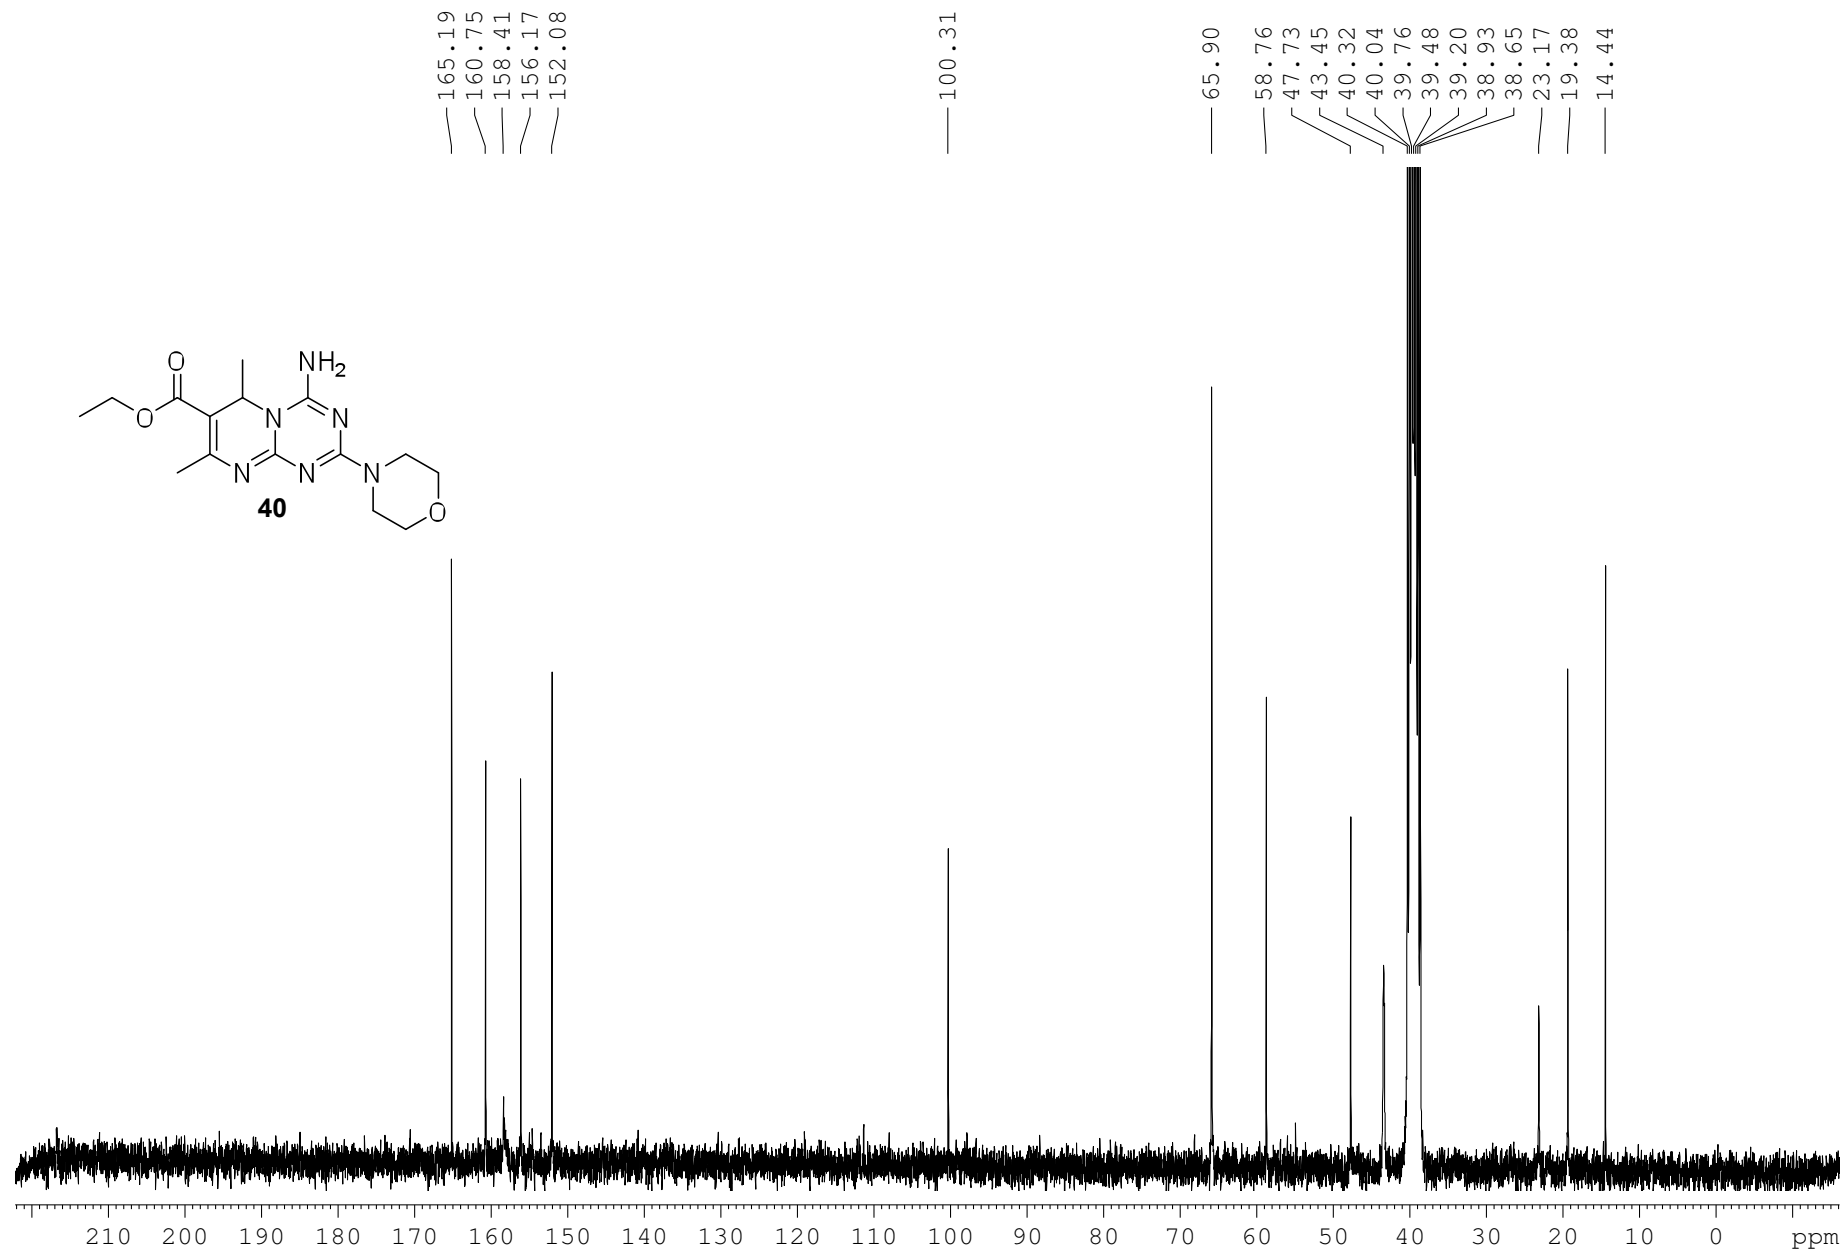

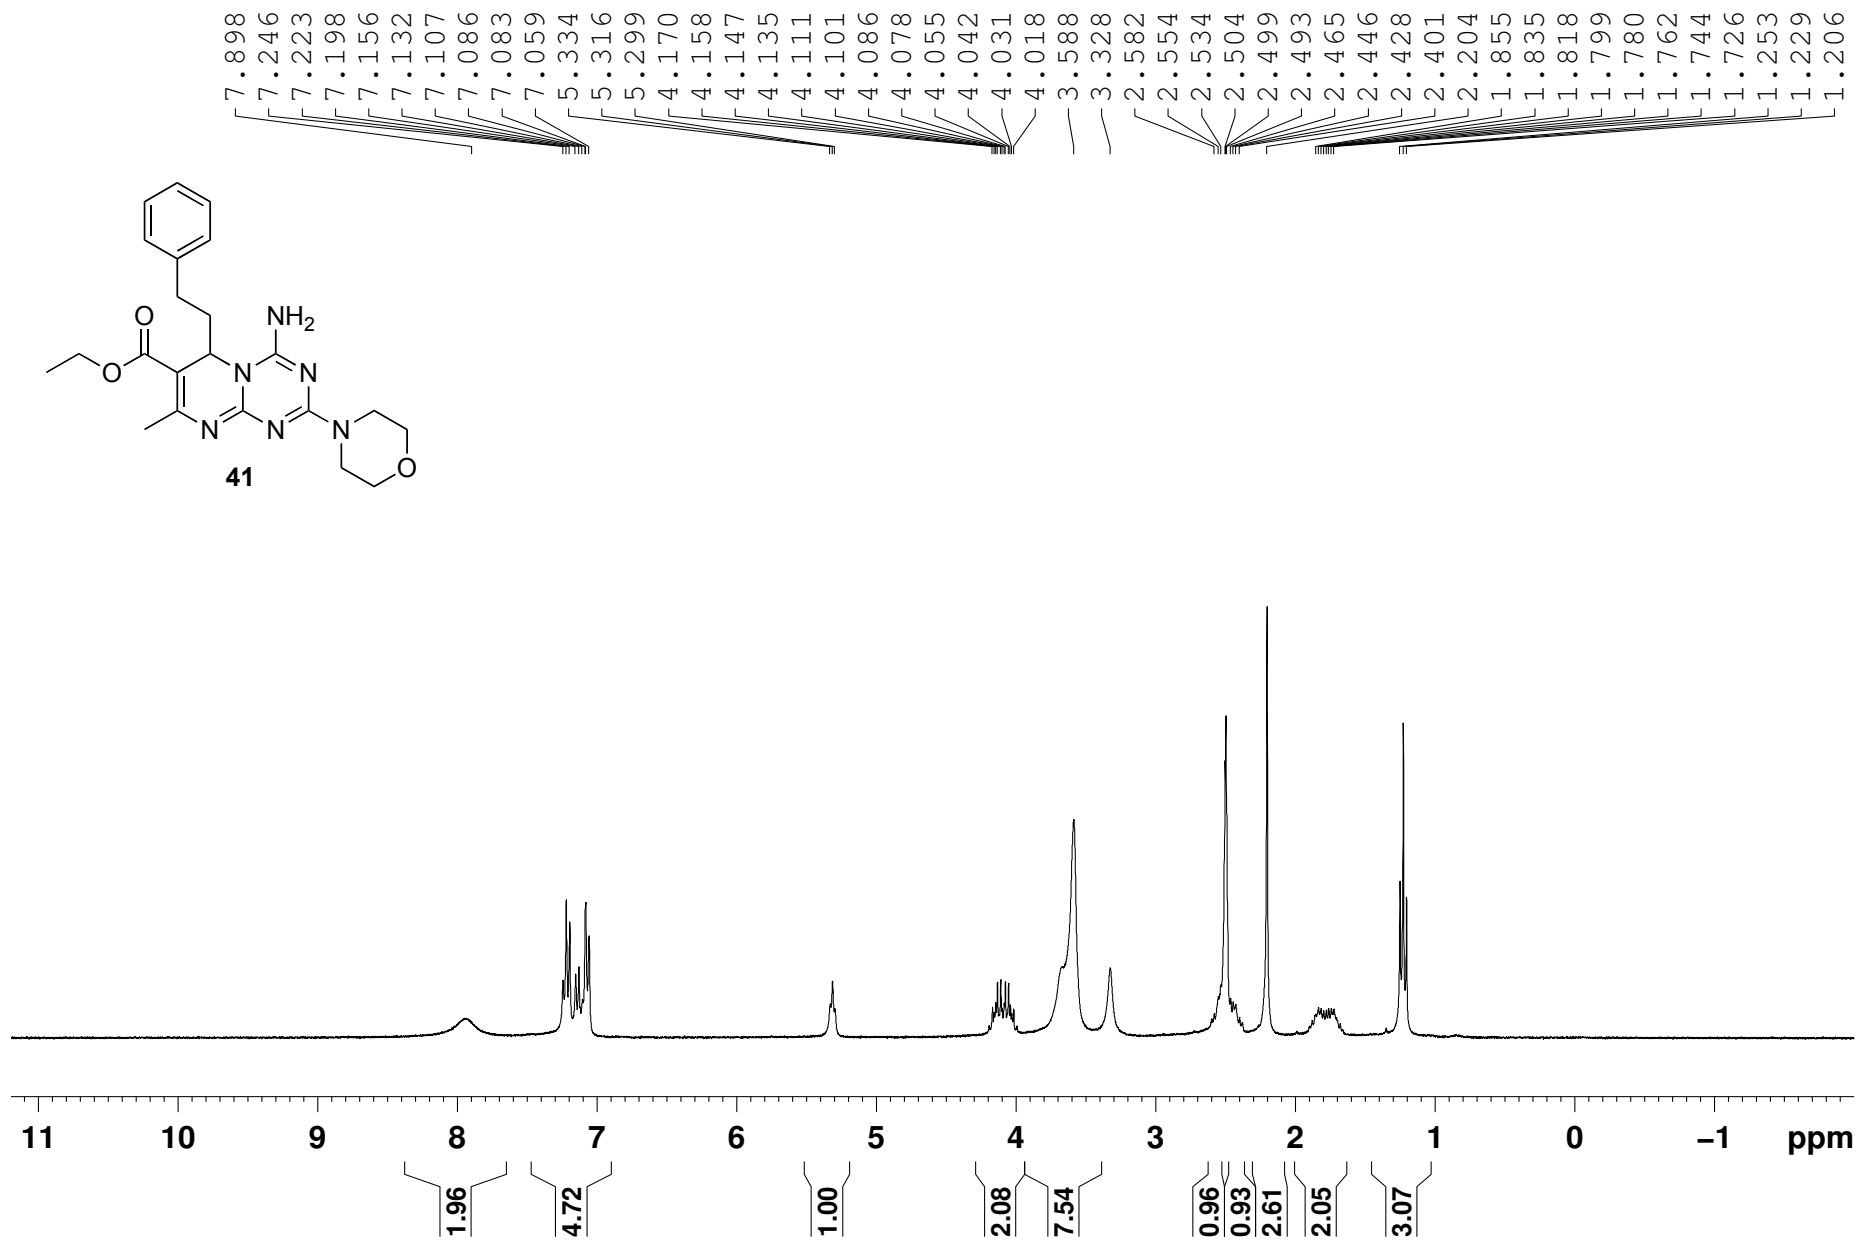

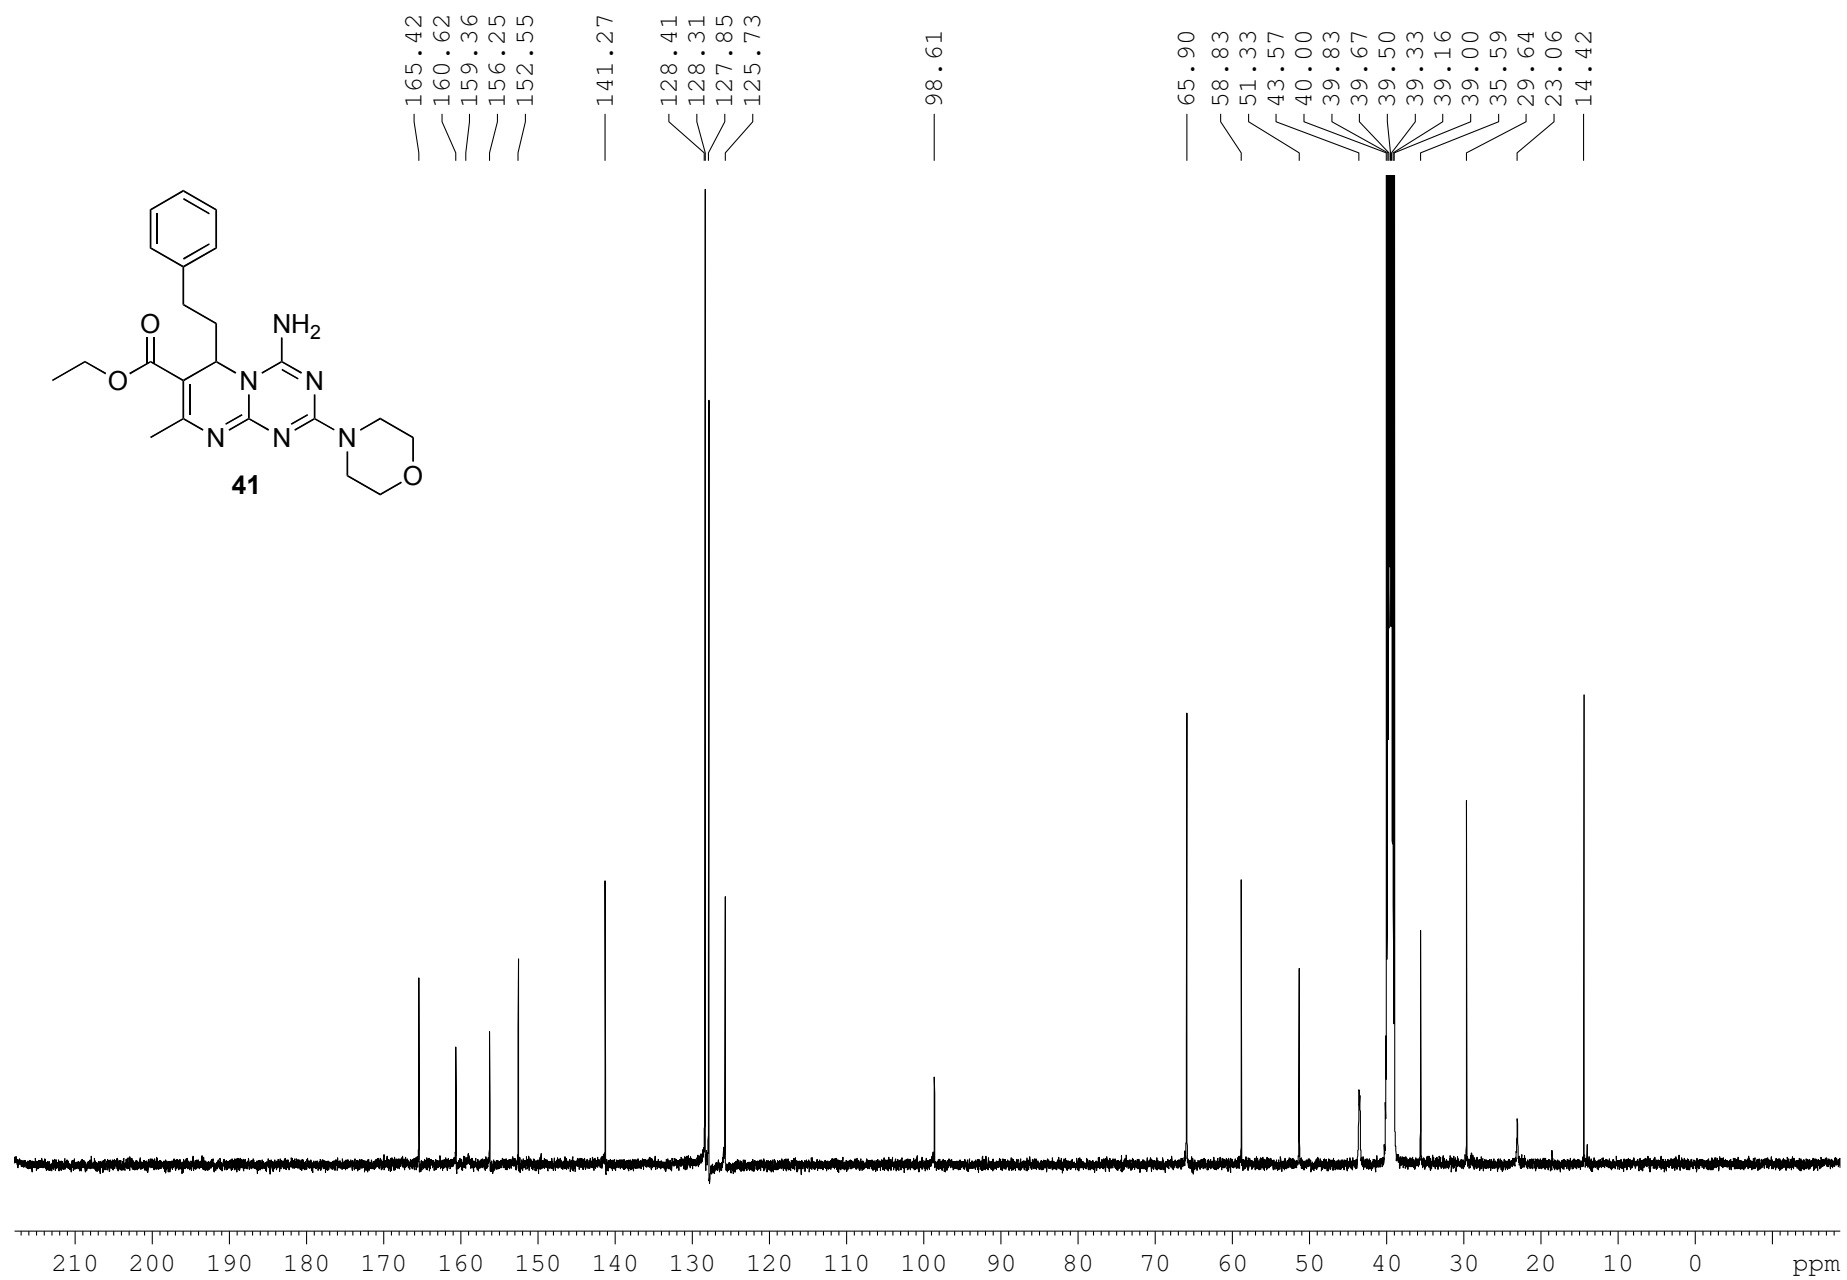



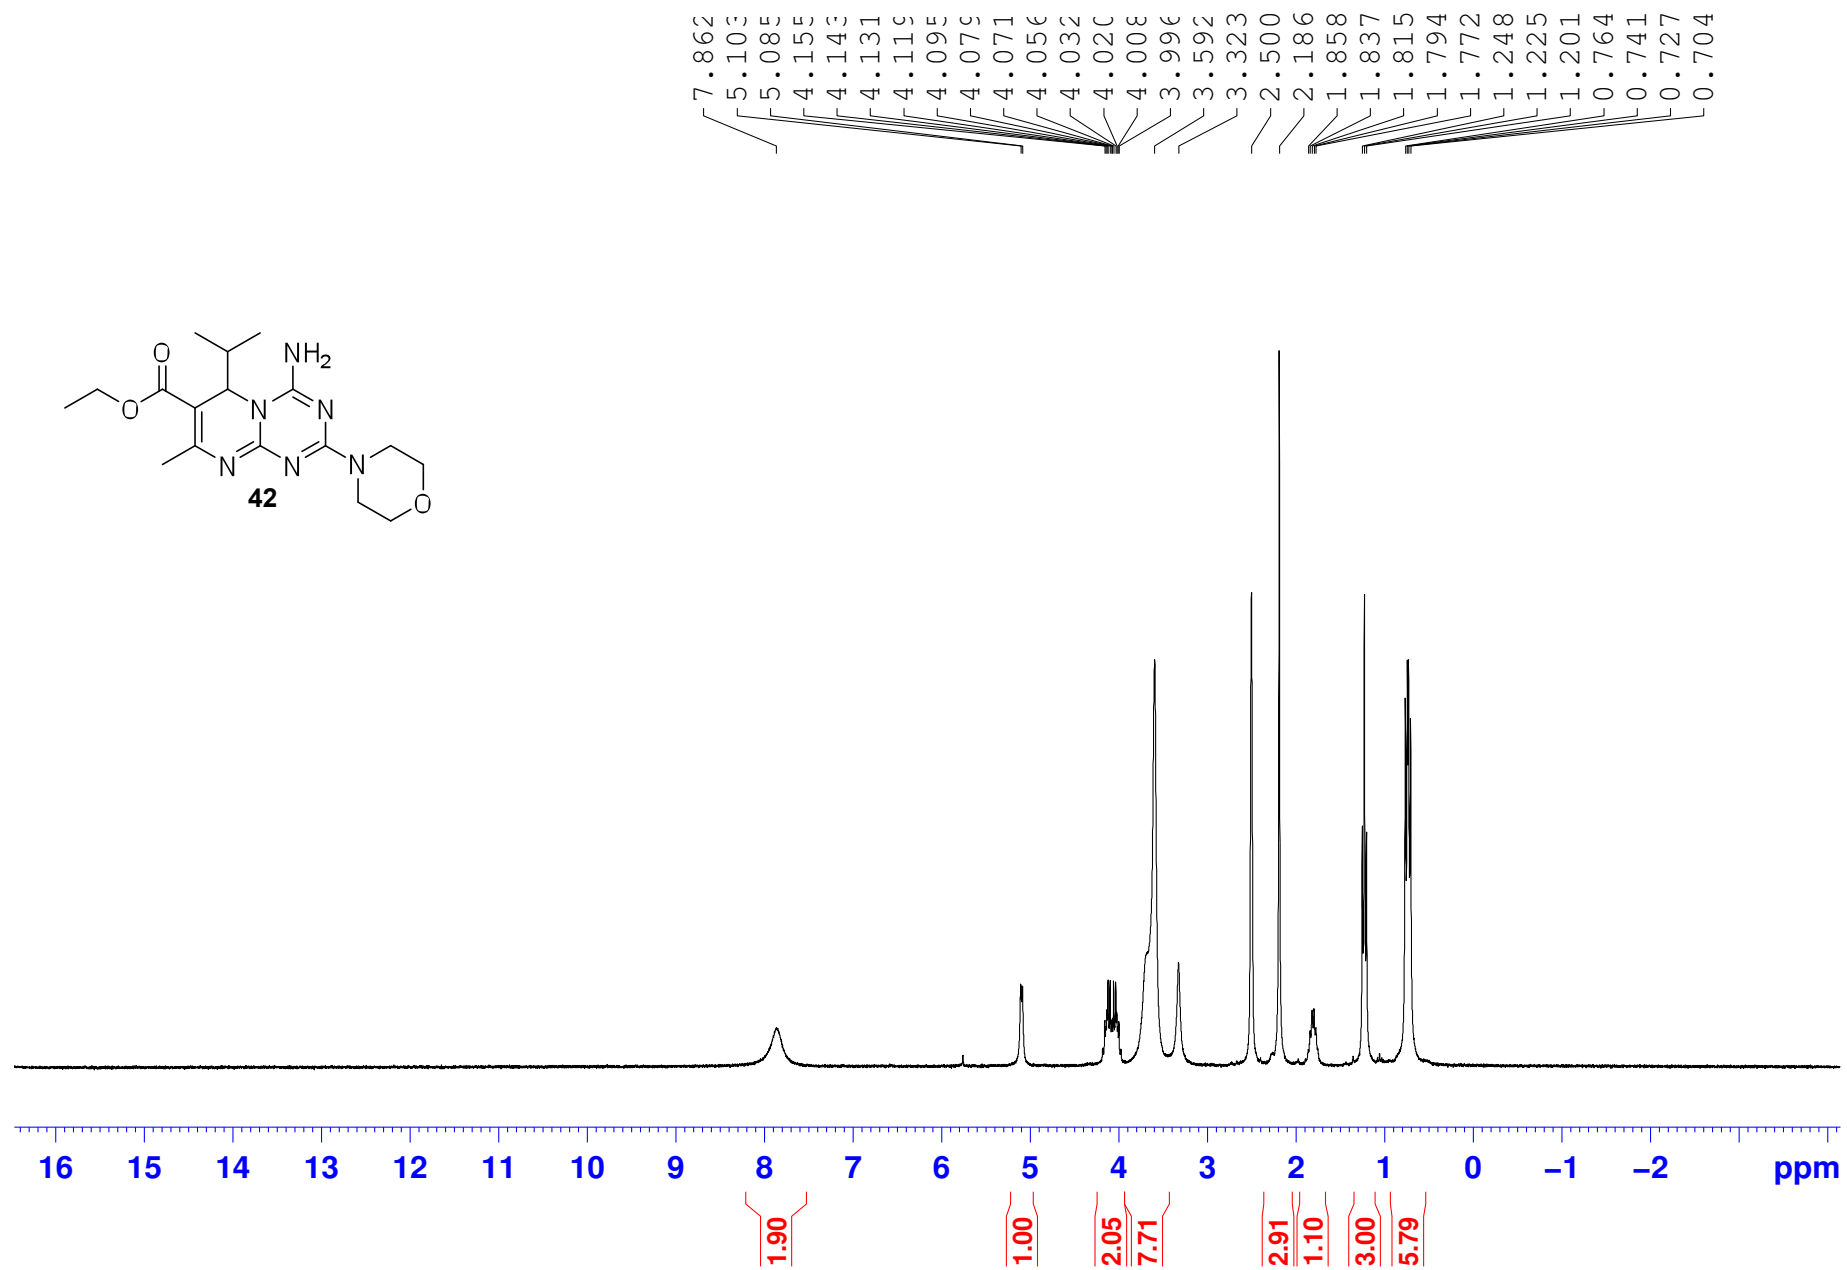

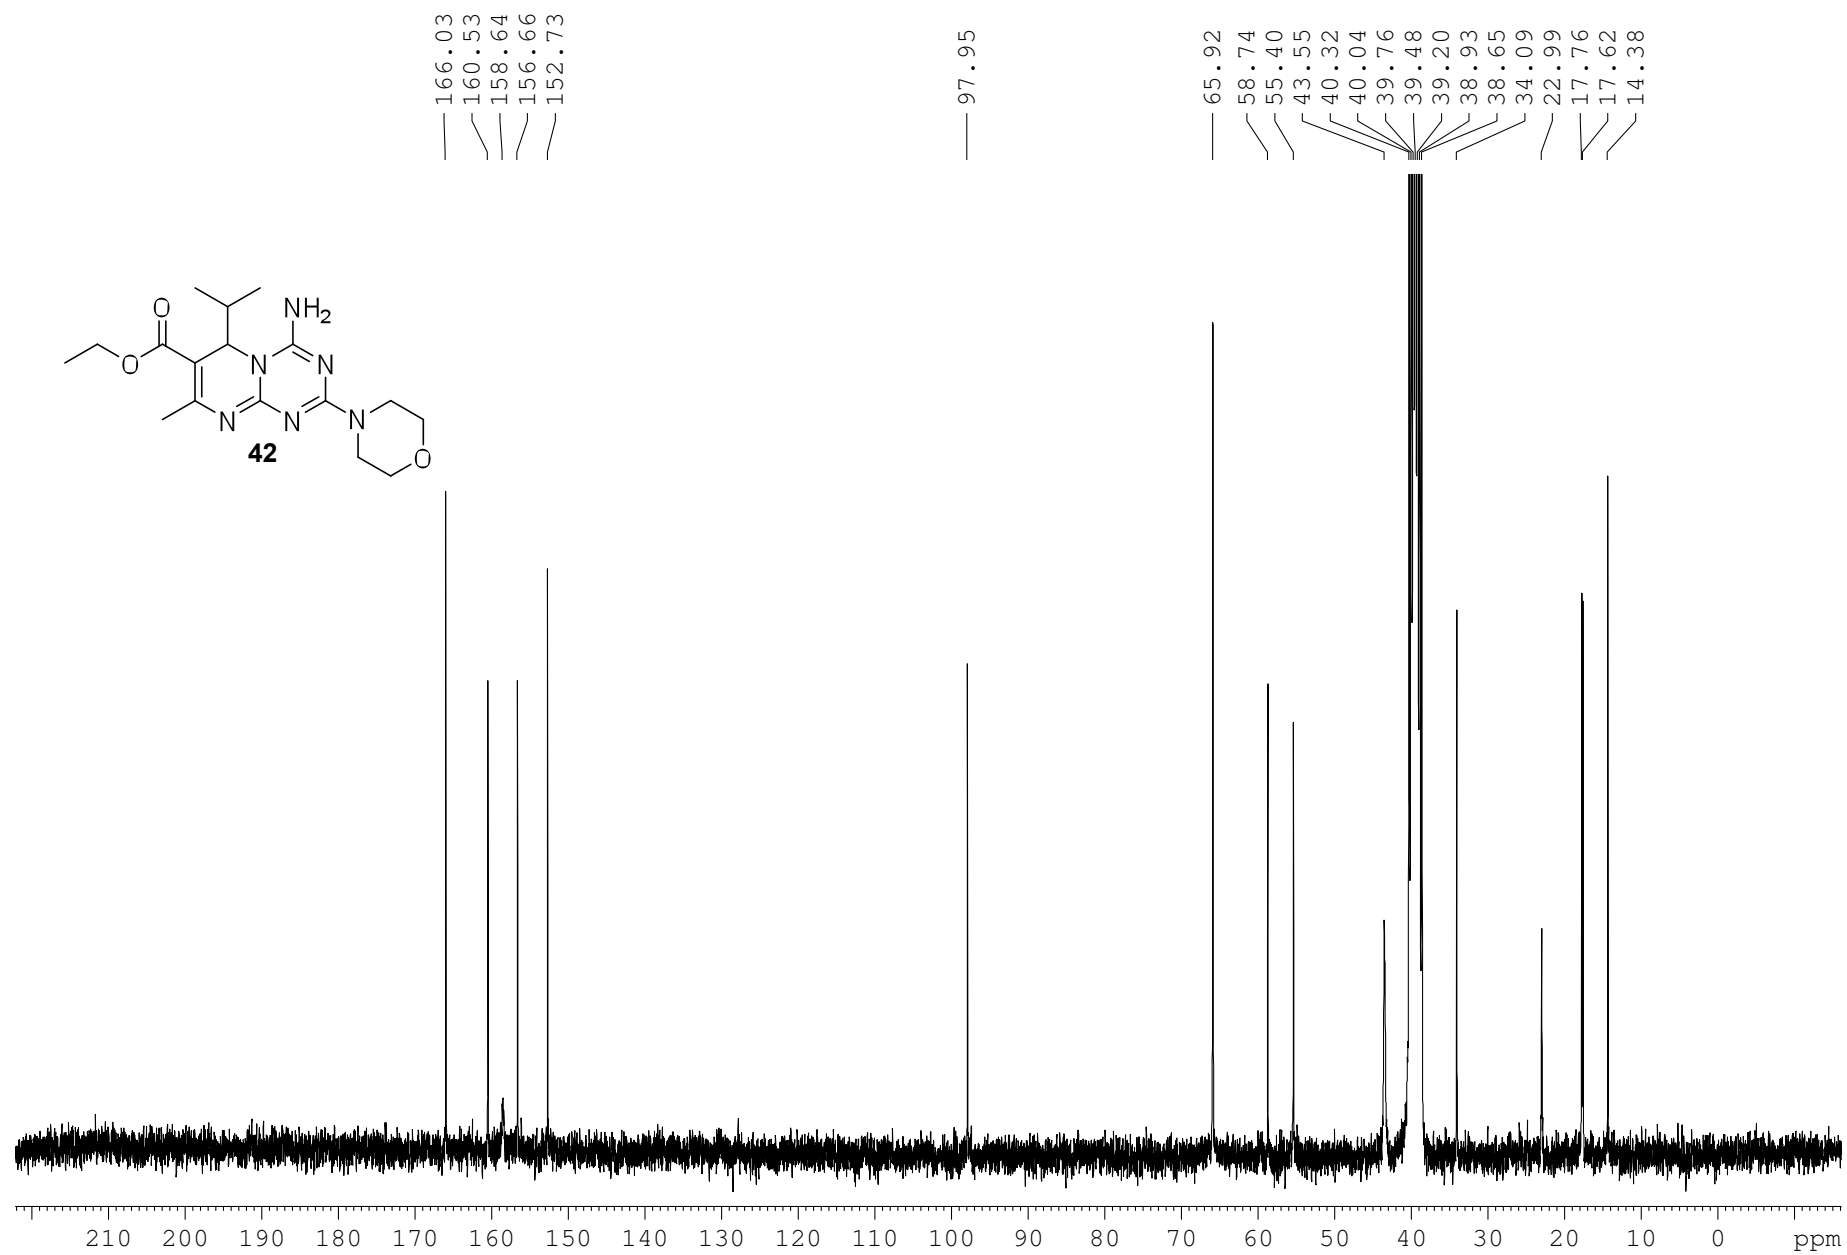

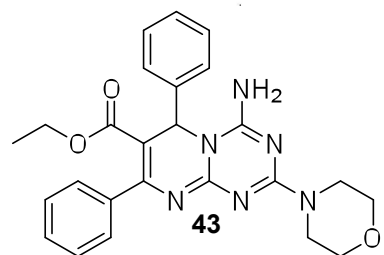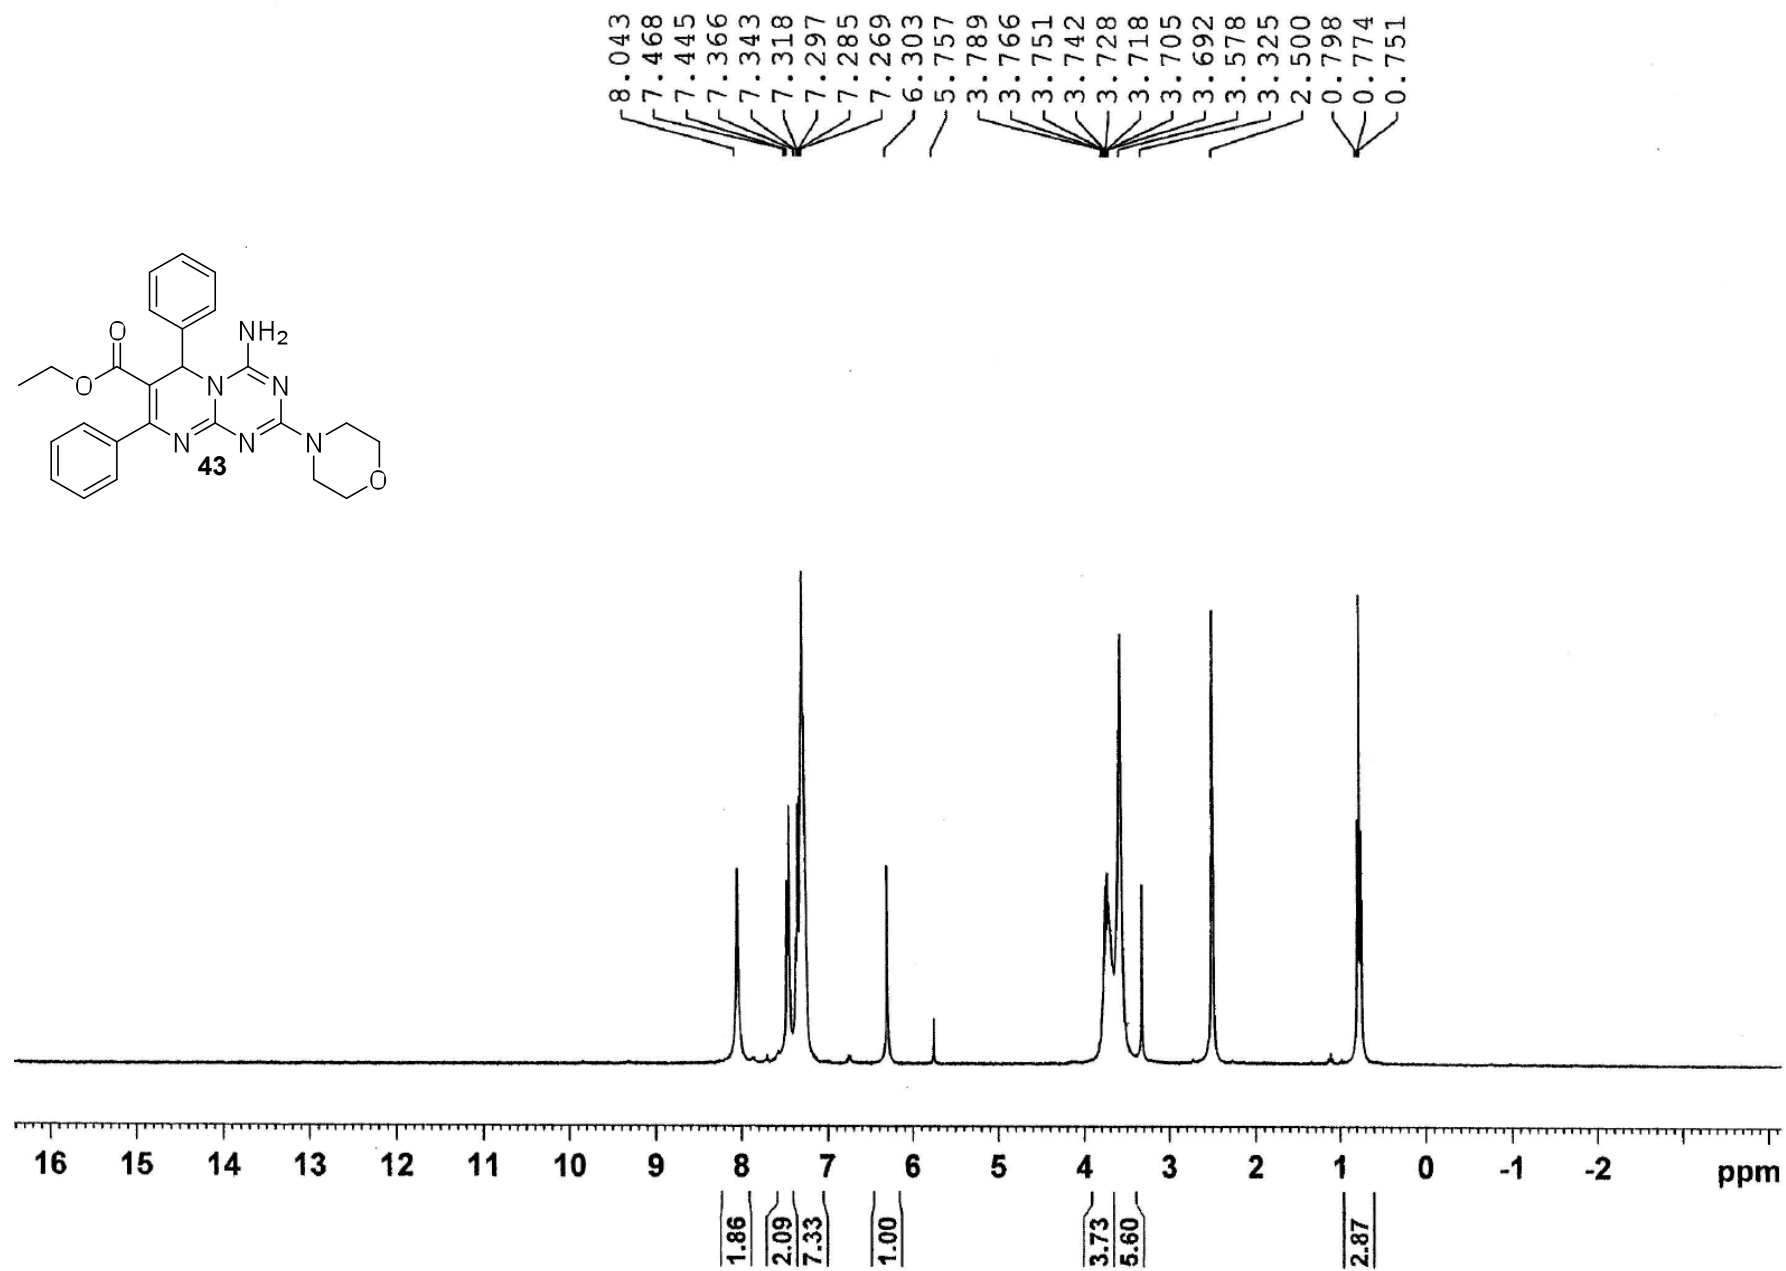

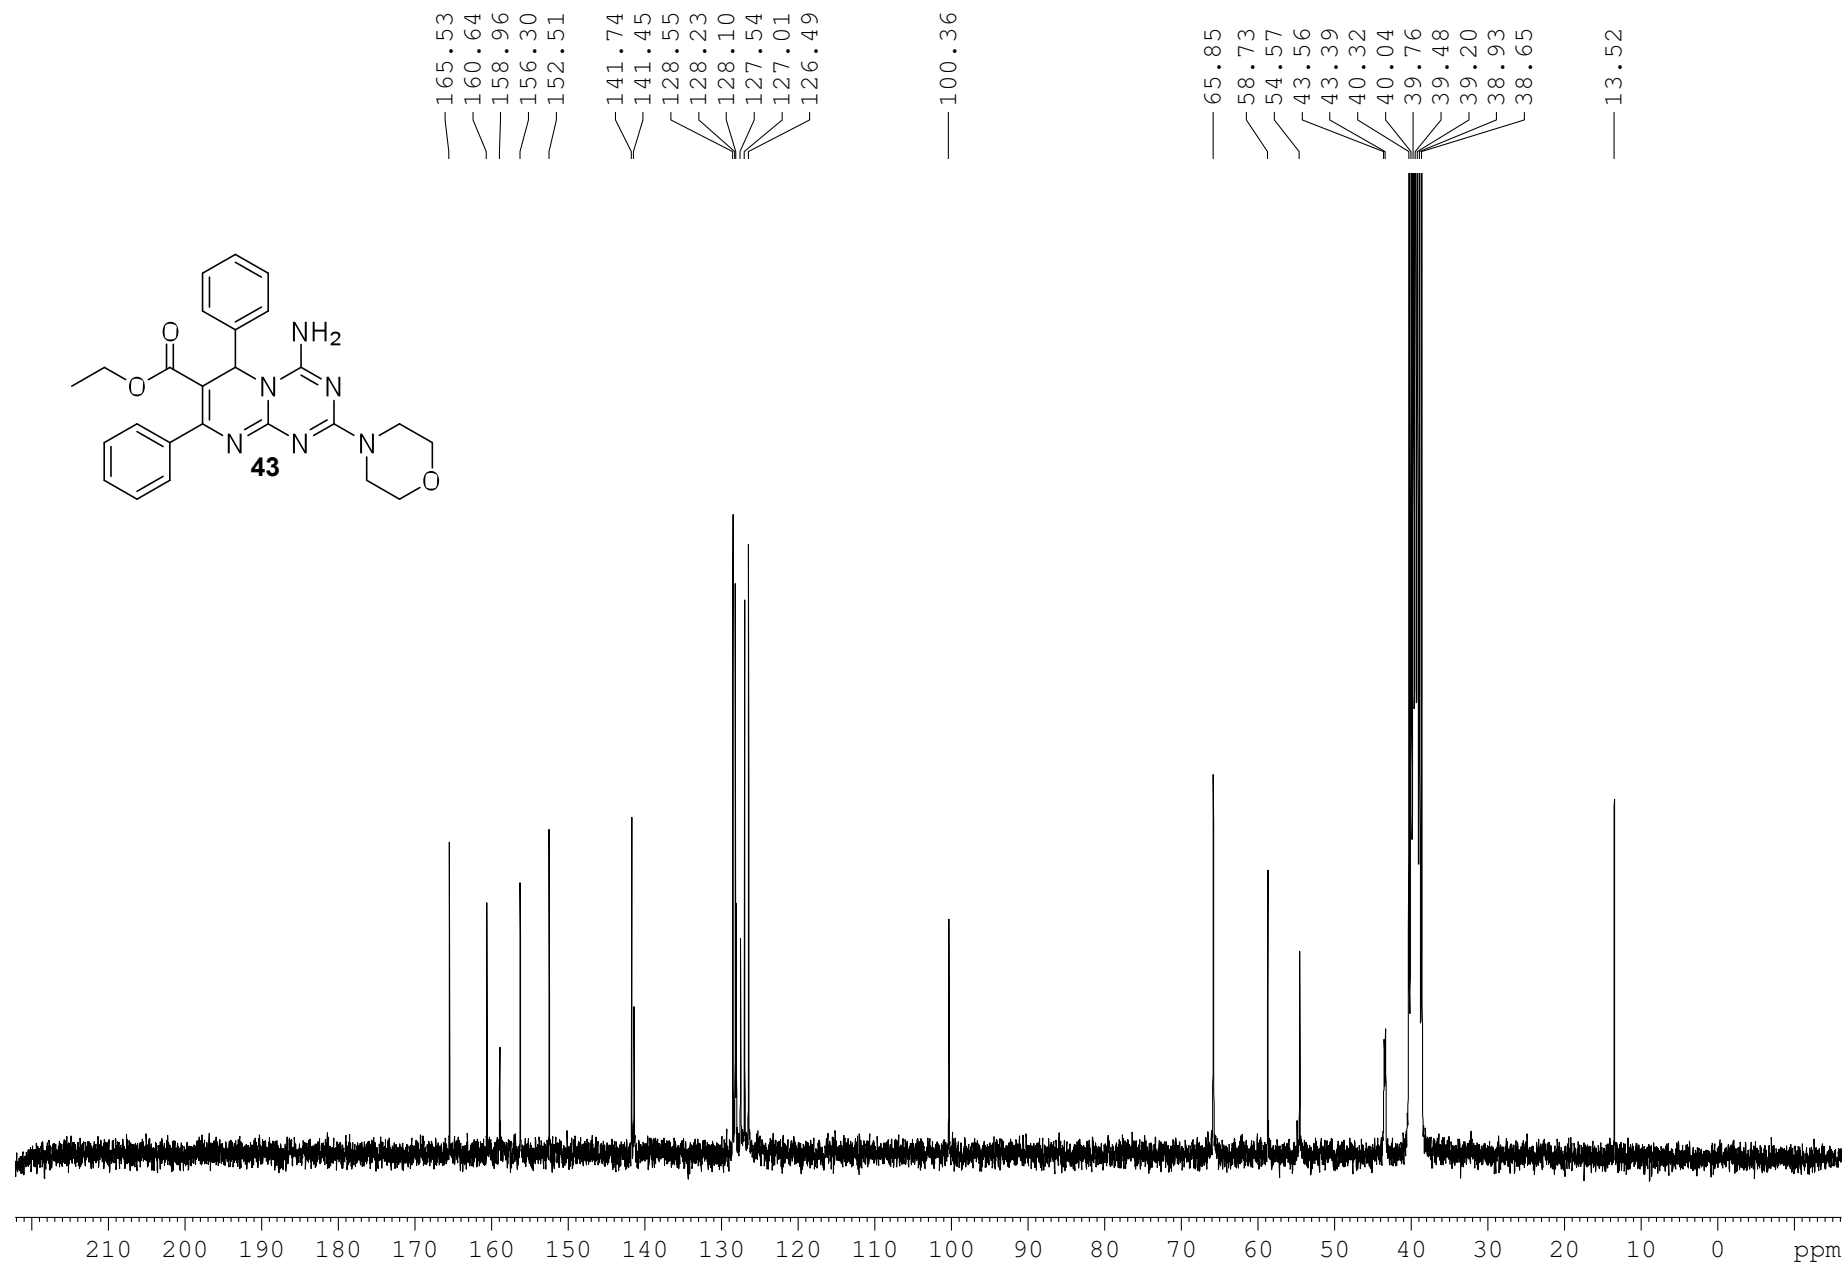

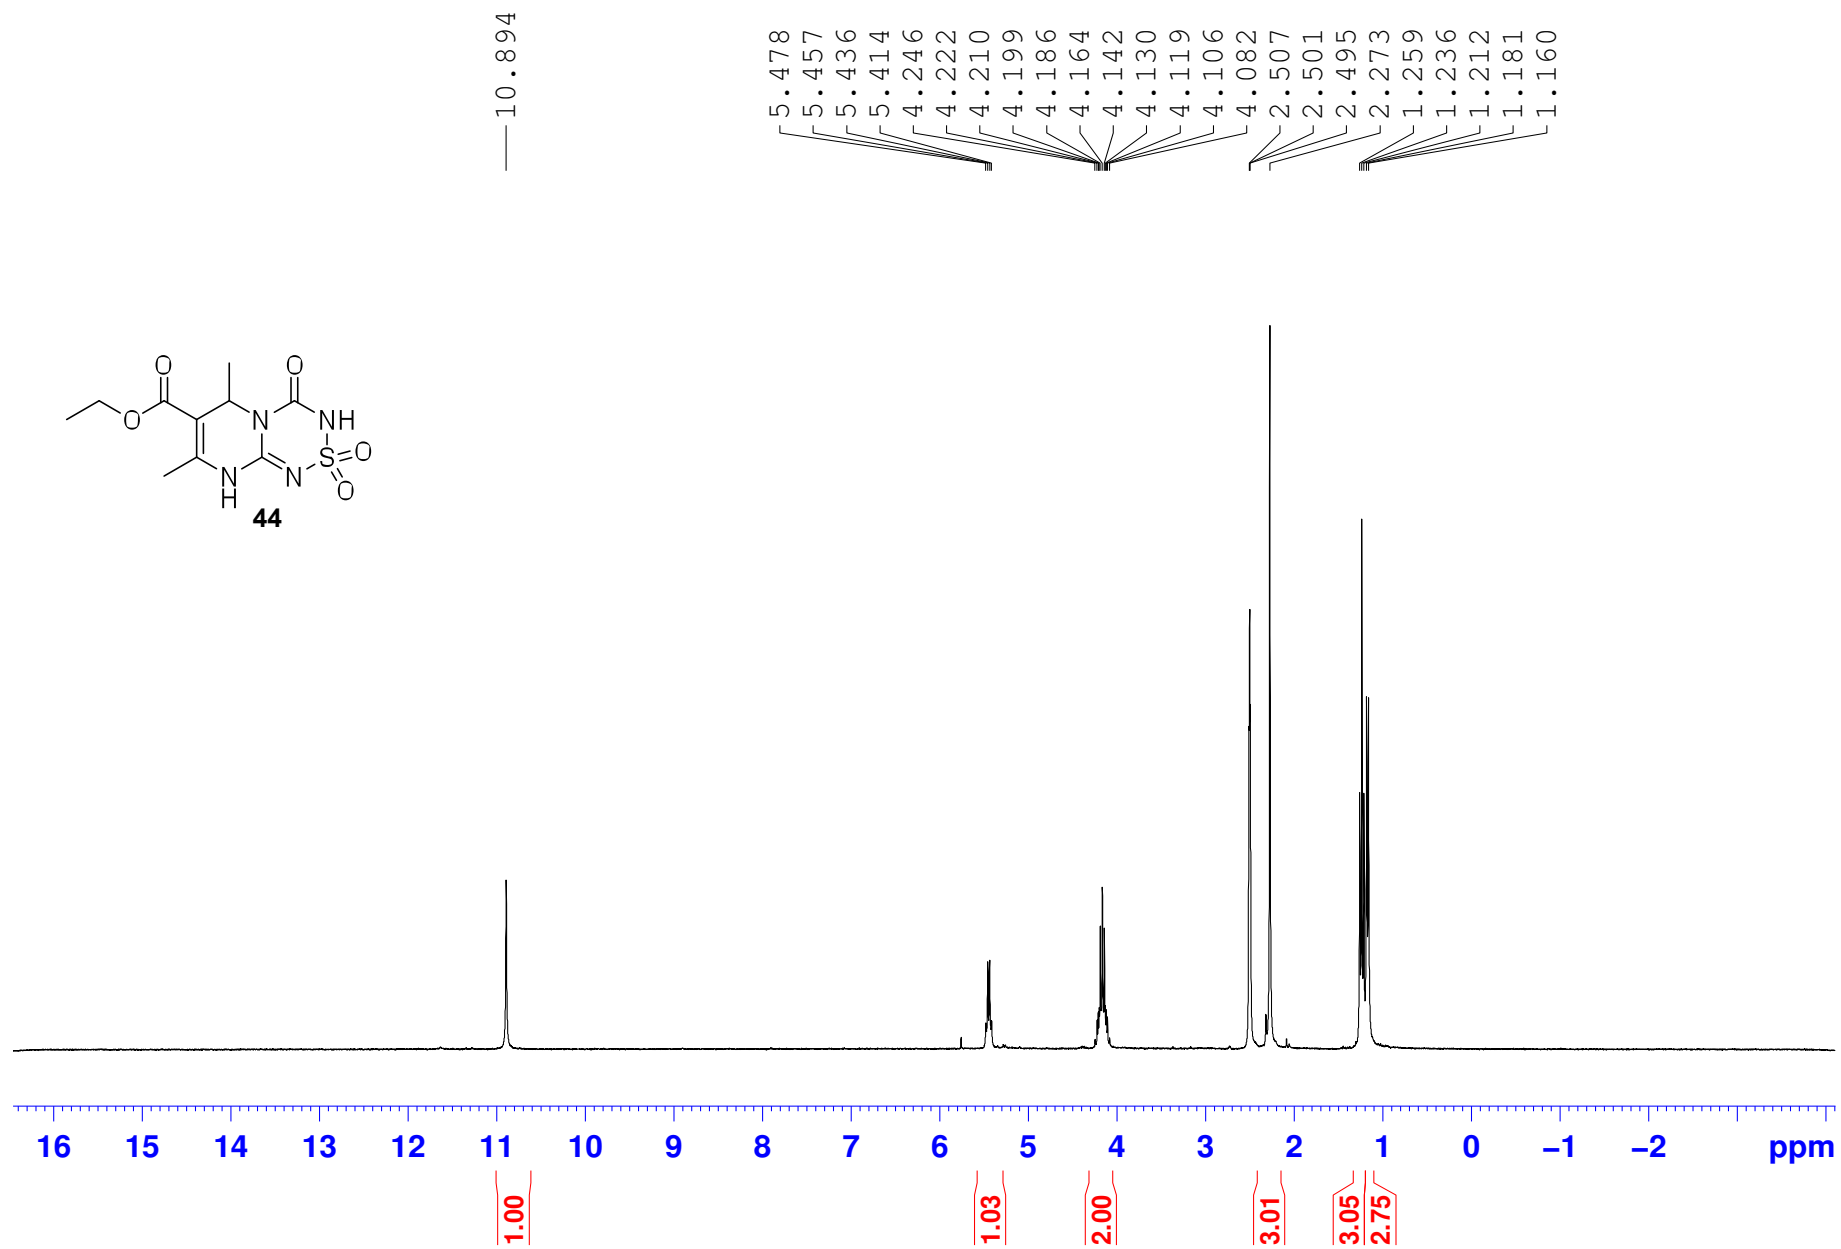

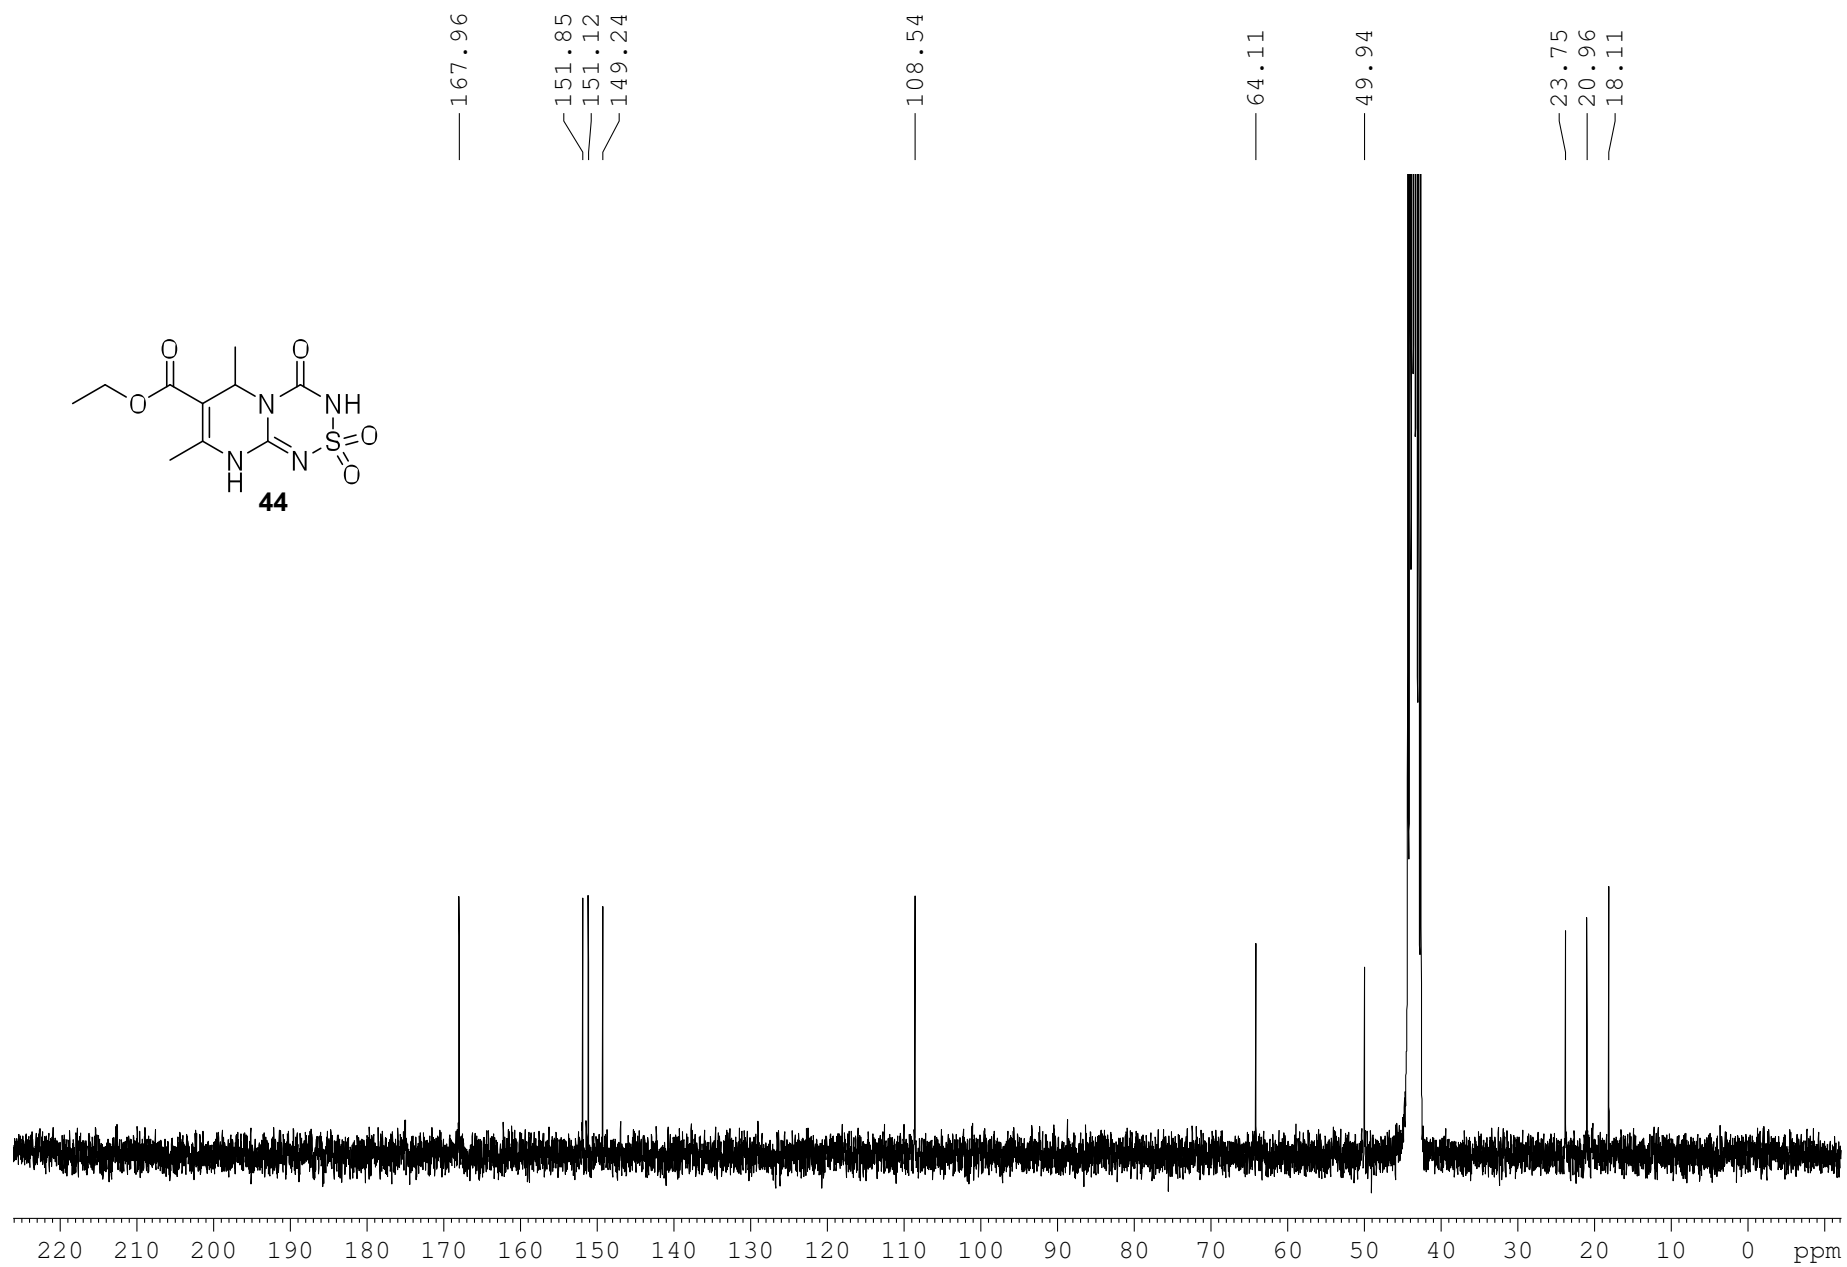

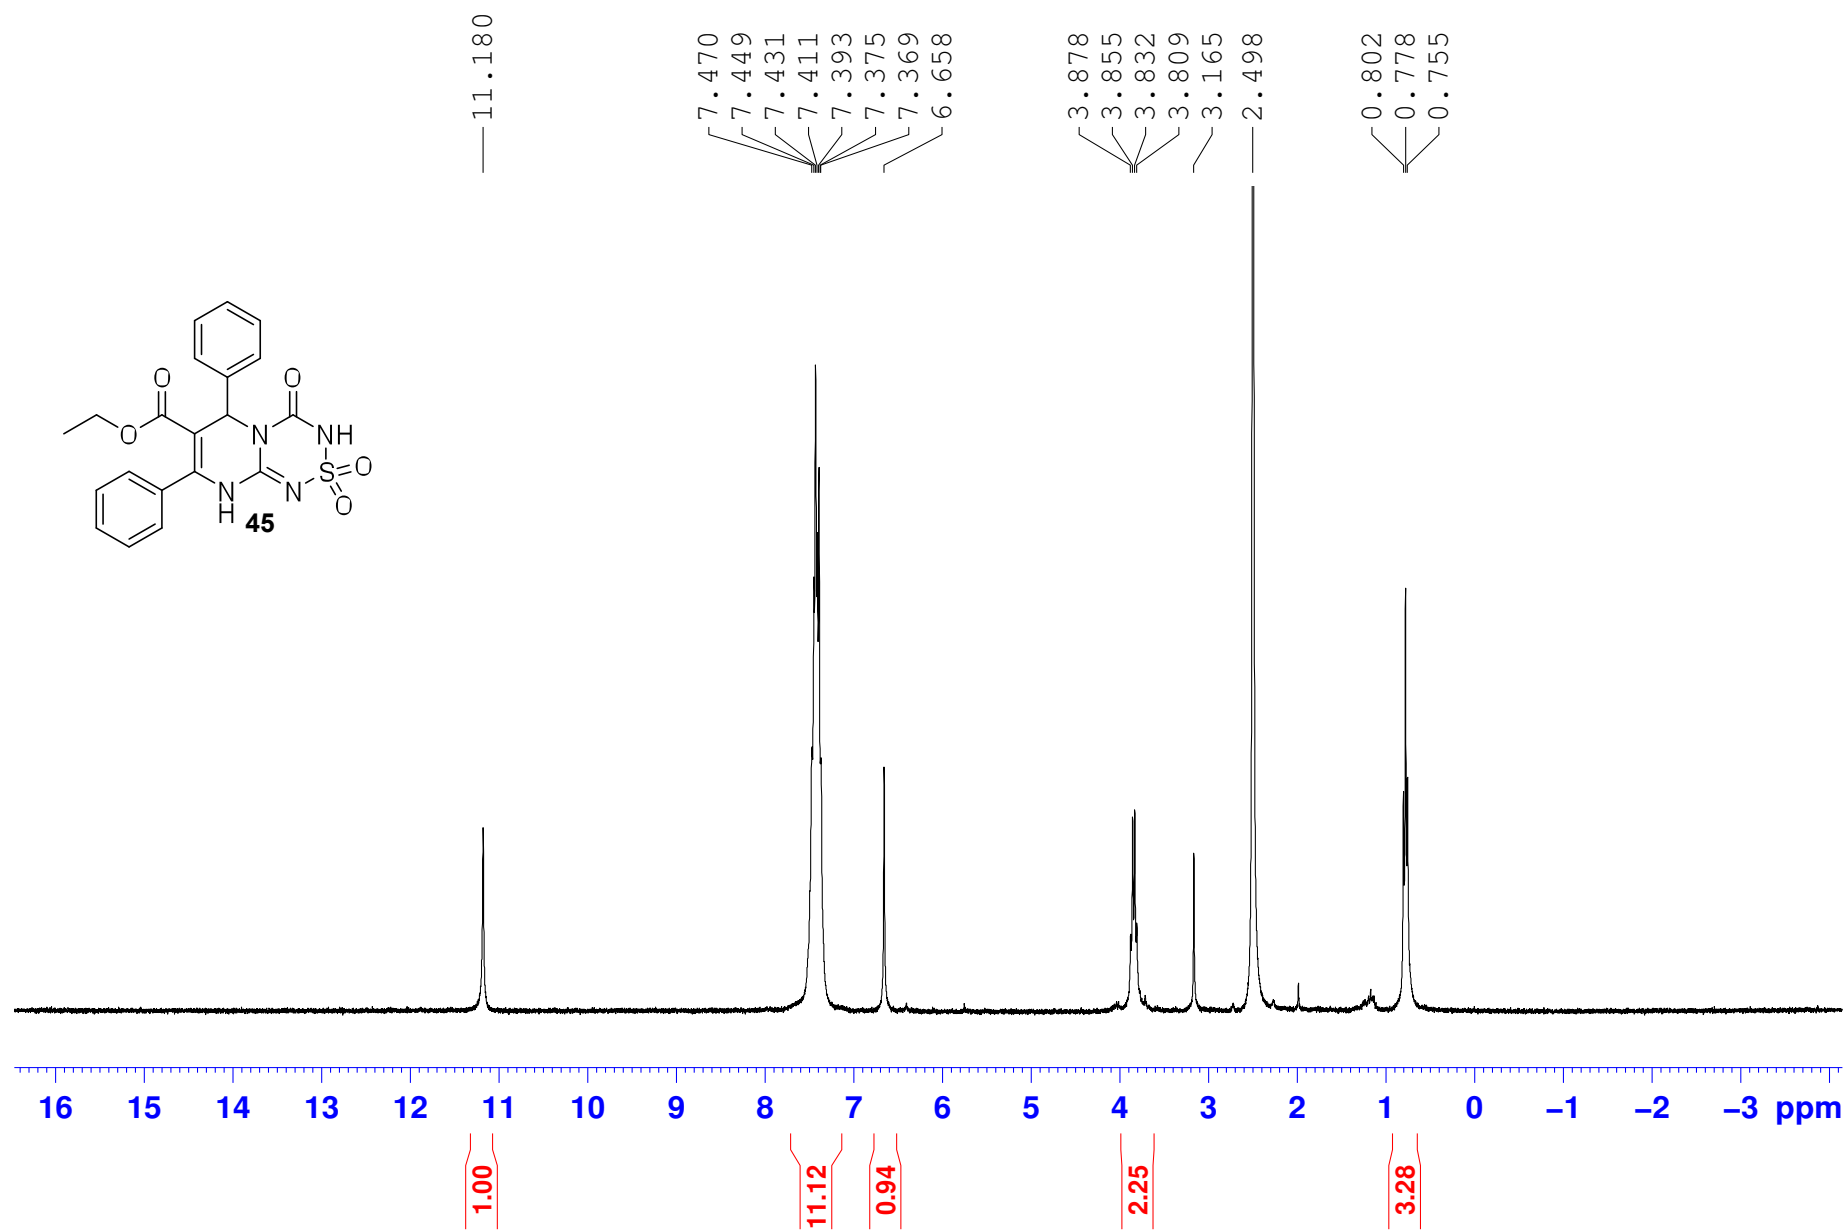

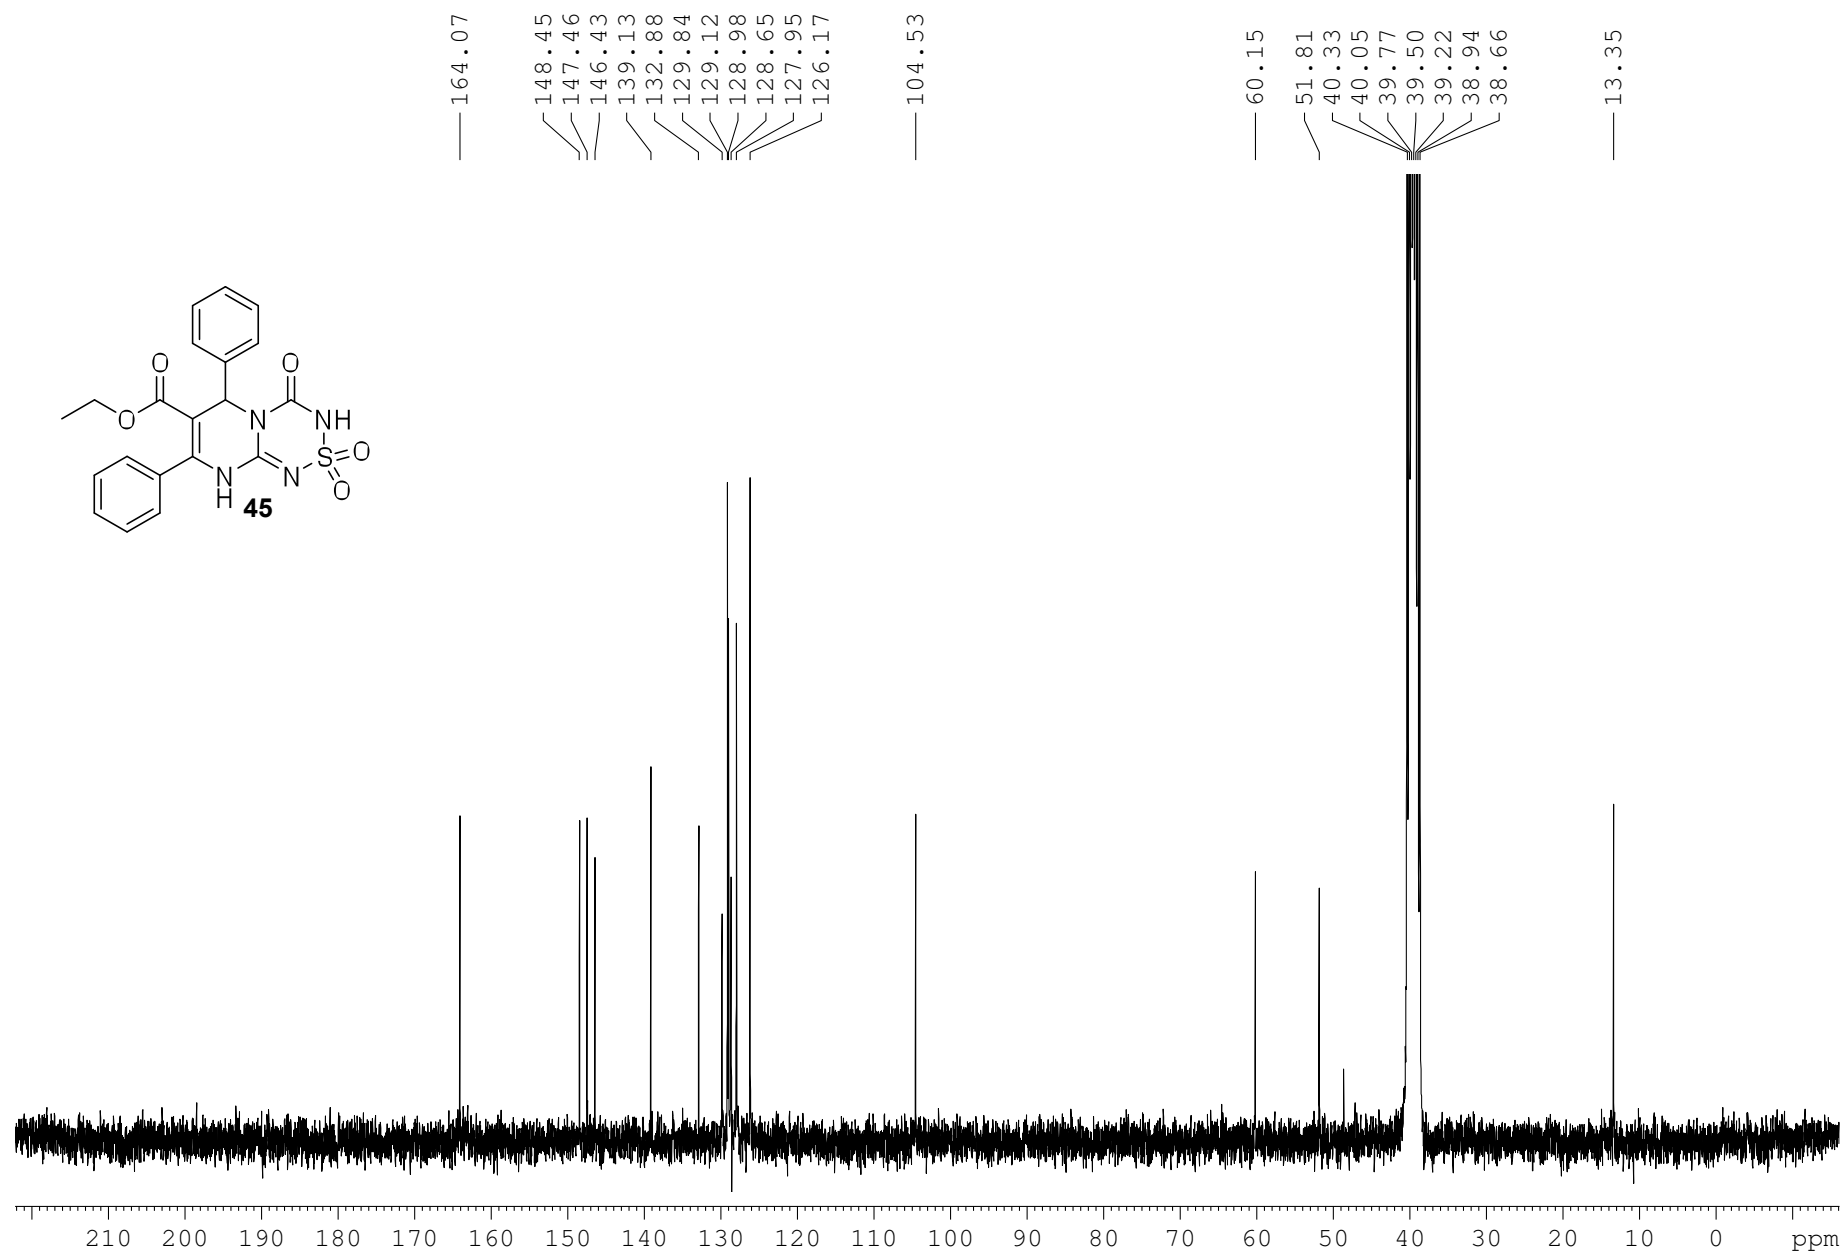



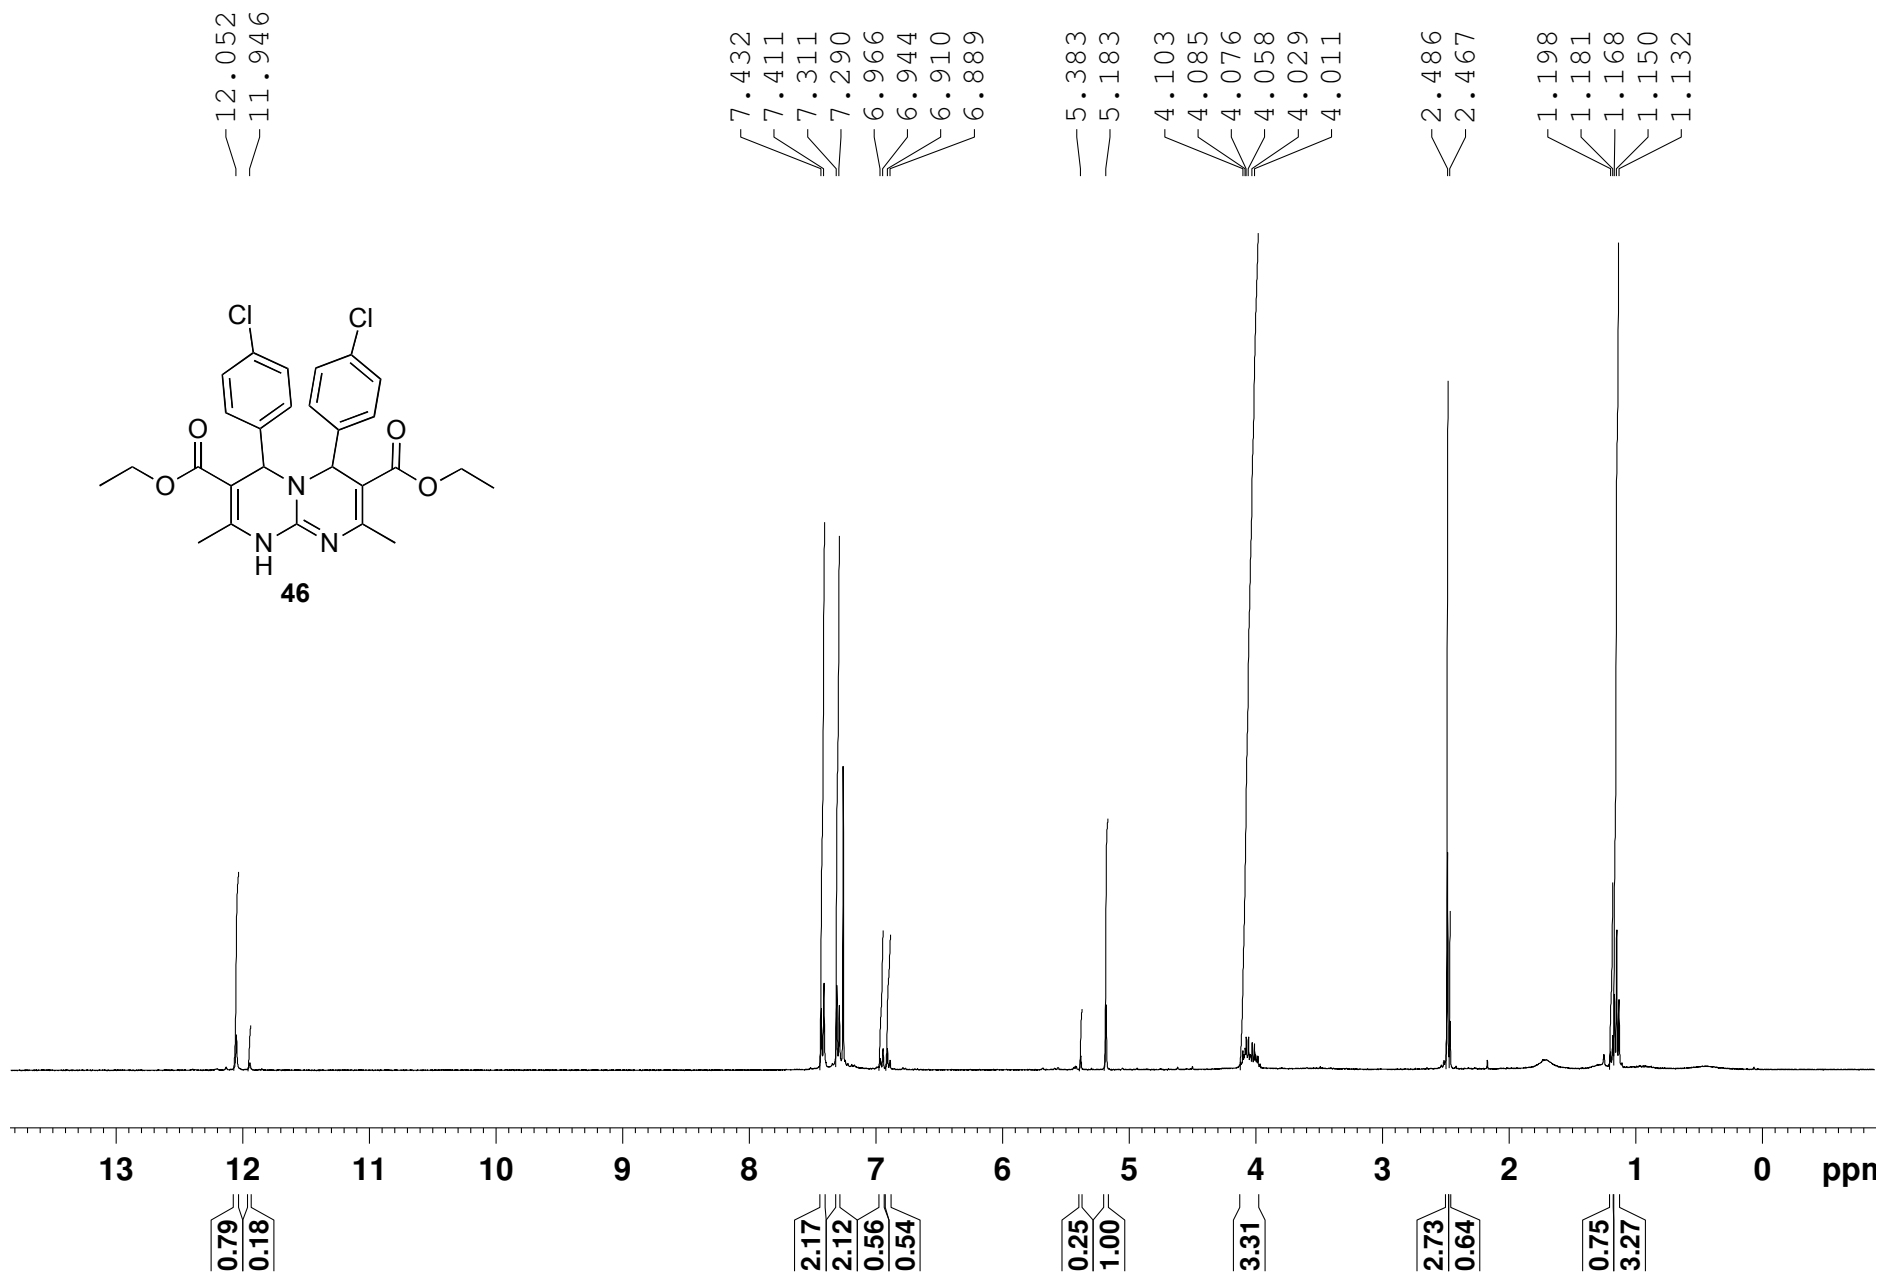

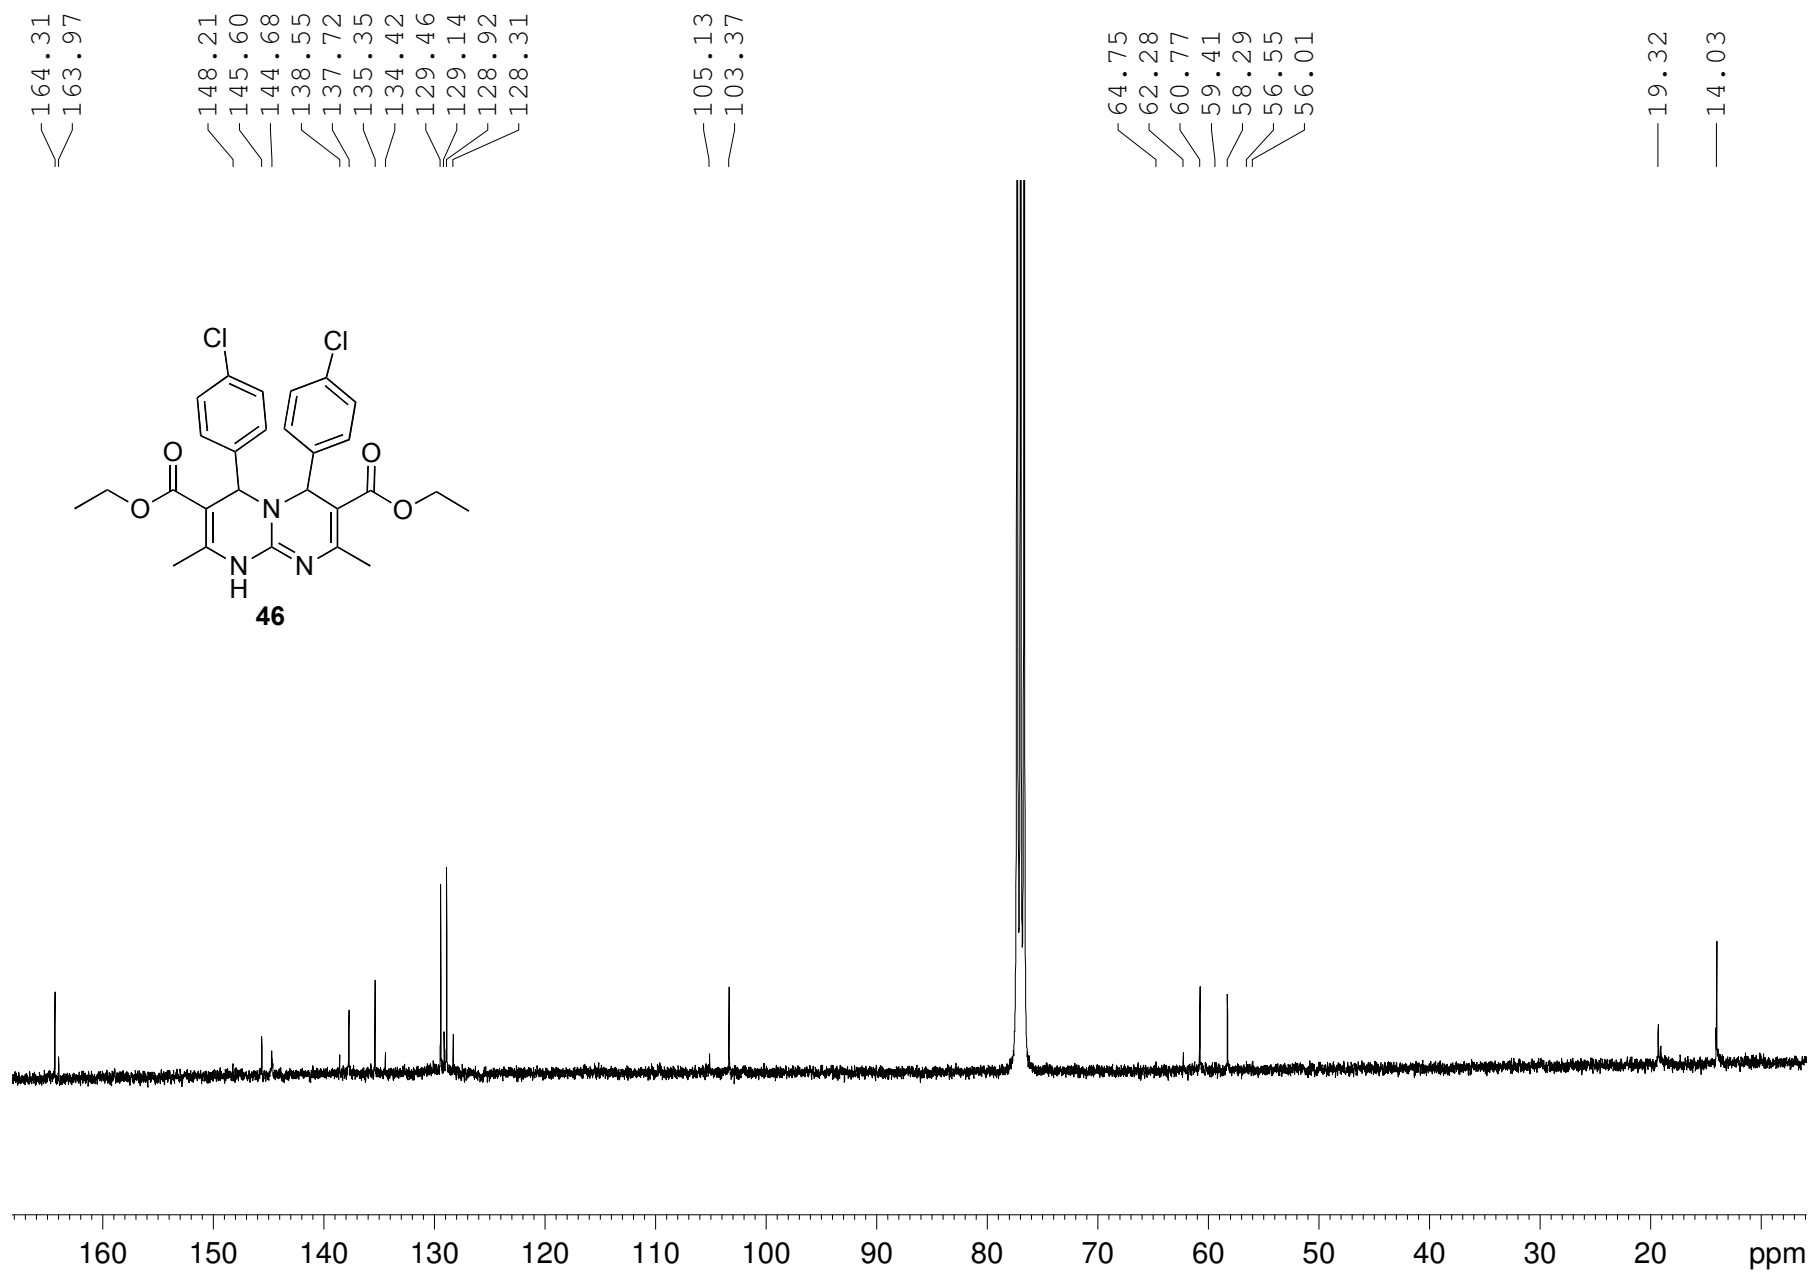

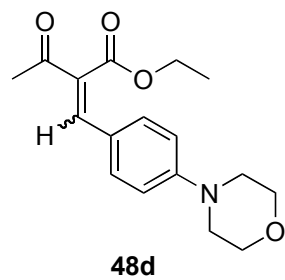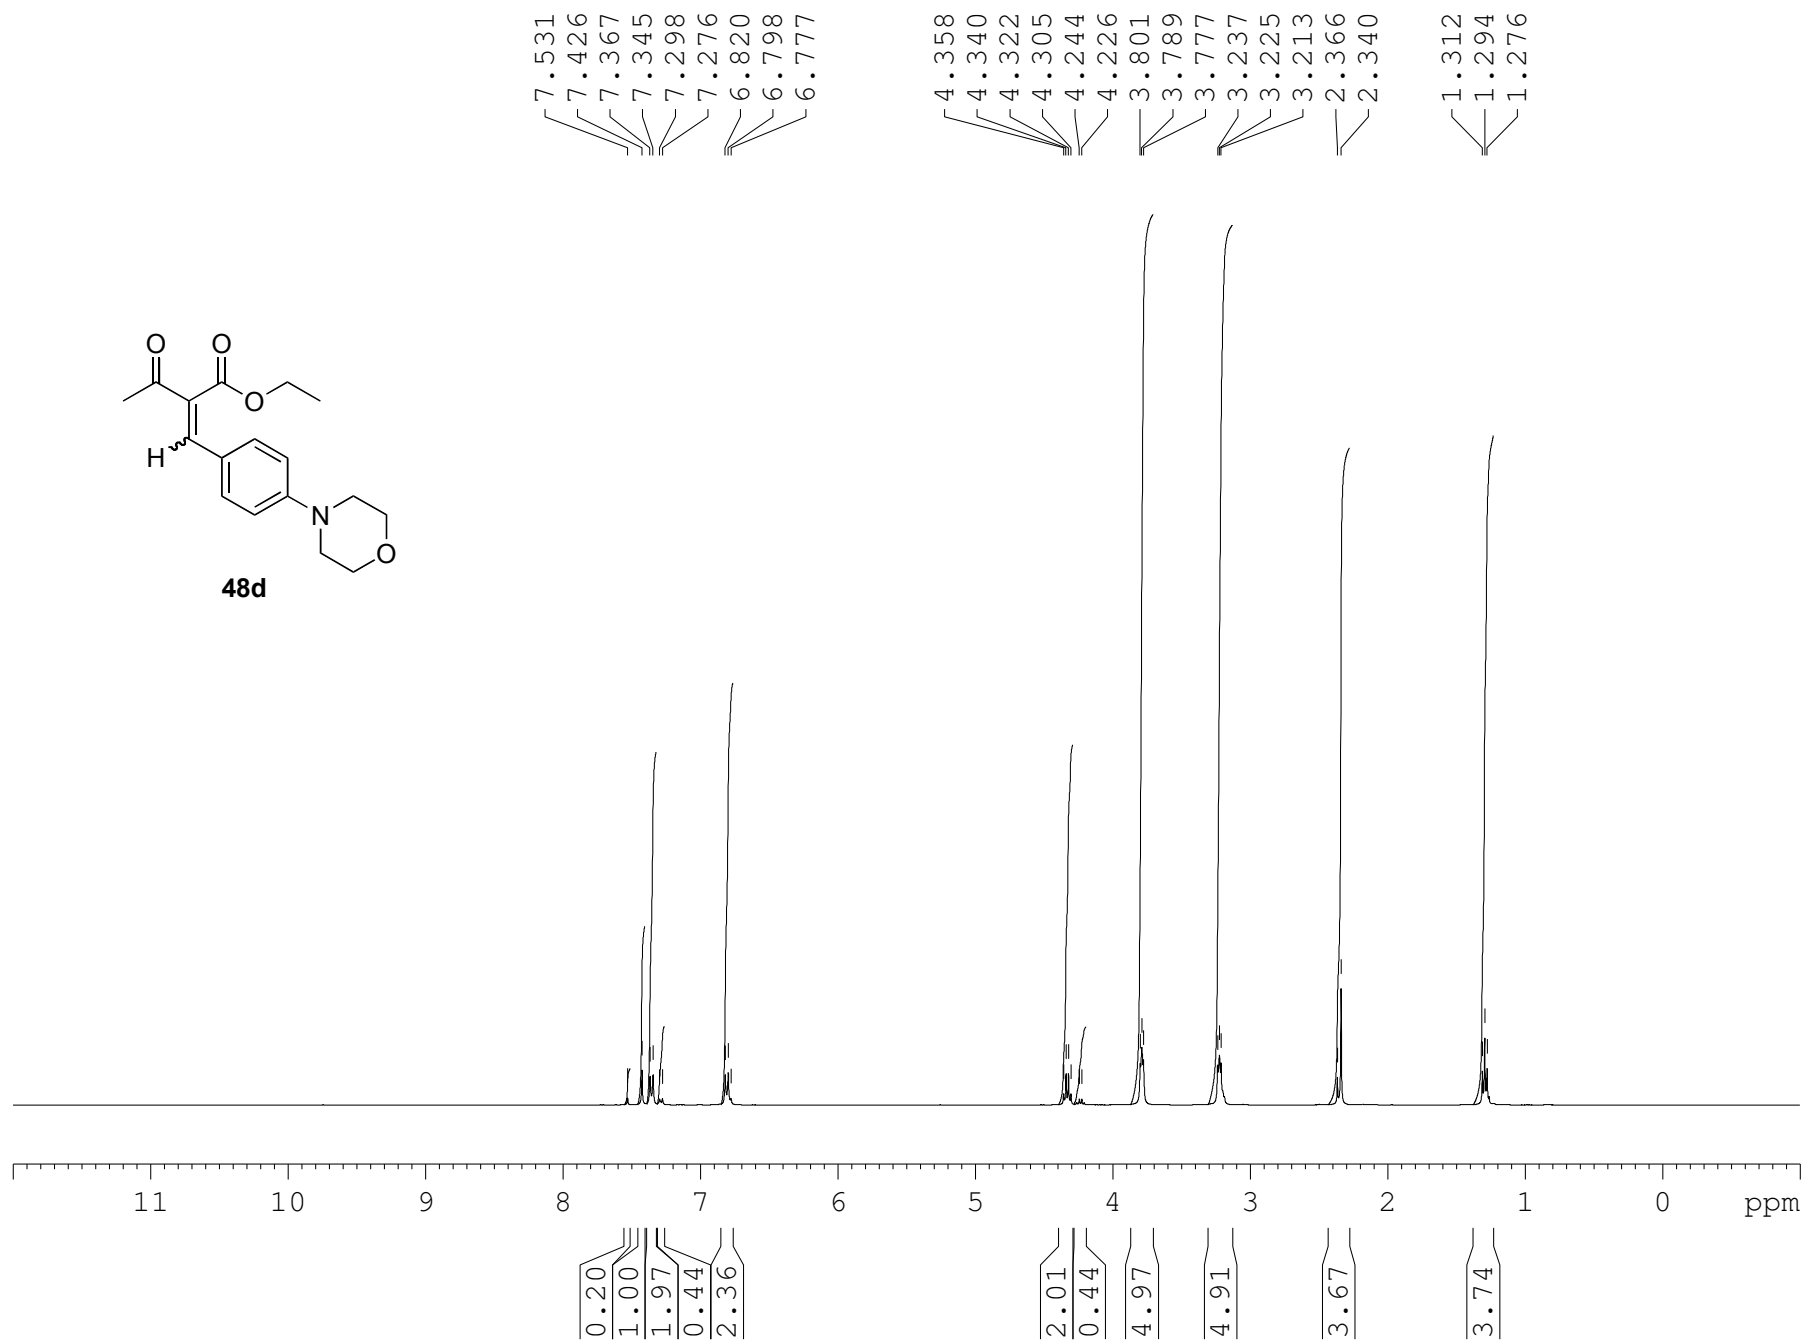

— 204.02  
— 194.46  
  
— 168.36  
— 164.64  
  
— 152.43  
— 152.14  
— 141.08  
— 140.27  
— 131.54  
— 131.45  
— 130.56  
— 129.71  
— 122.92  
— 122.61  
— 113.97  
— 113.85

— 66.22  
— 61.23  
— 60.89  
  
— 47.31  
— 47.21  
  
— 31.01  
— 26.01  
  
— 13.96  
— 13.75

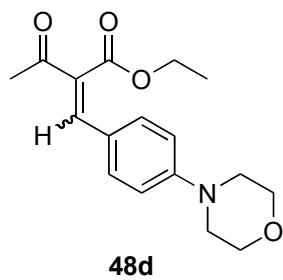

48d

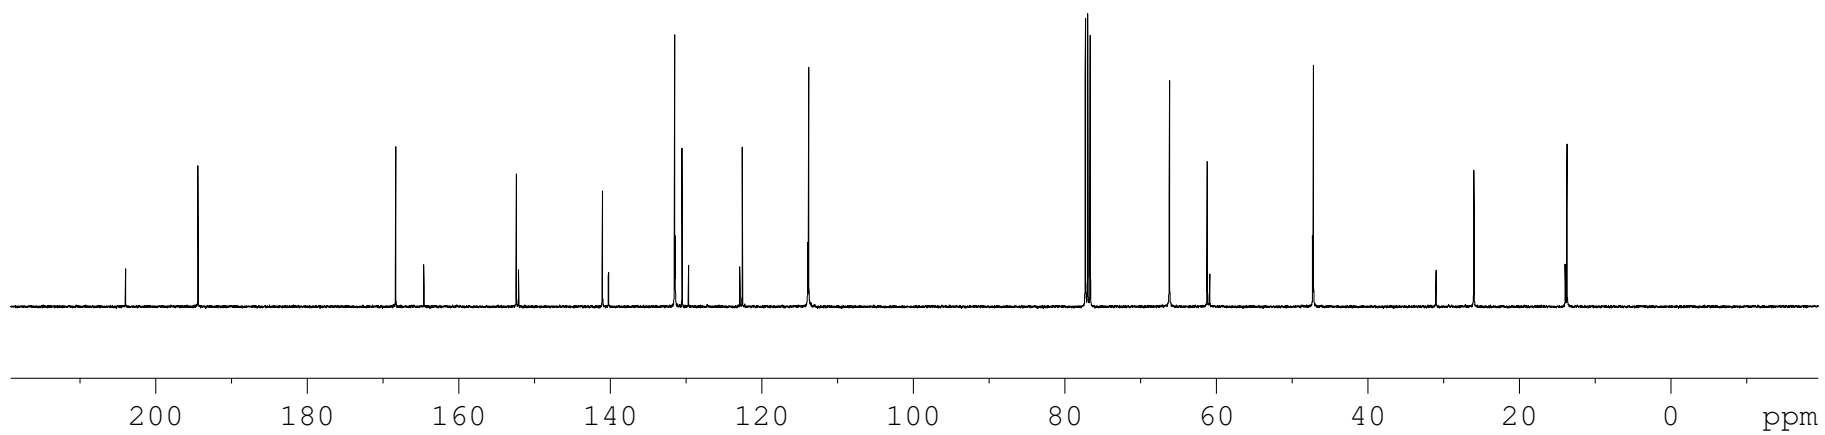

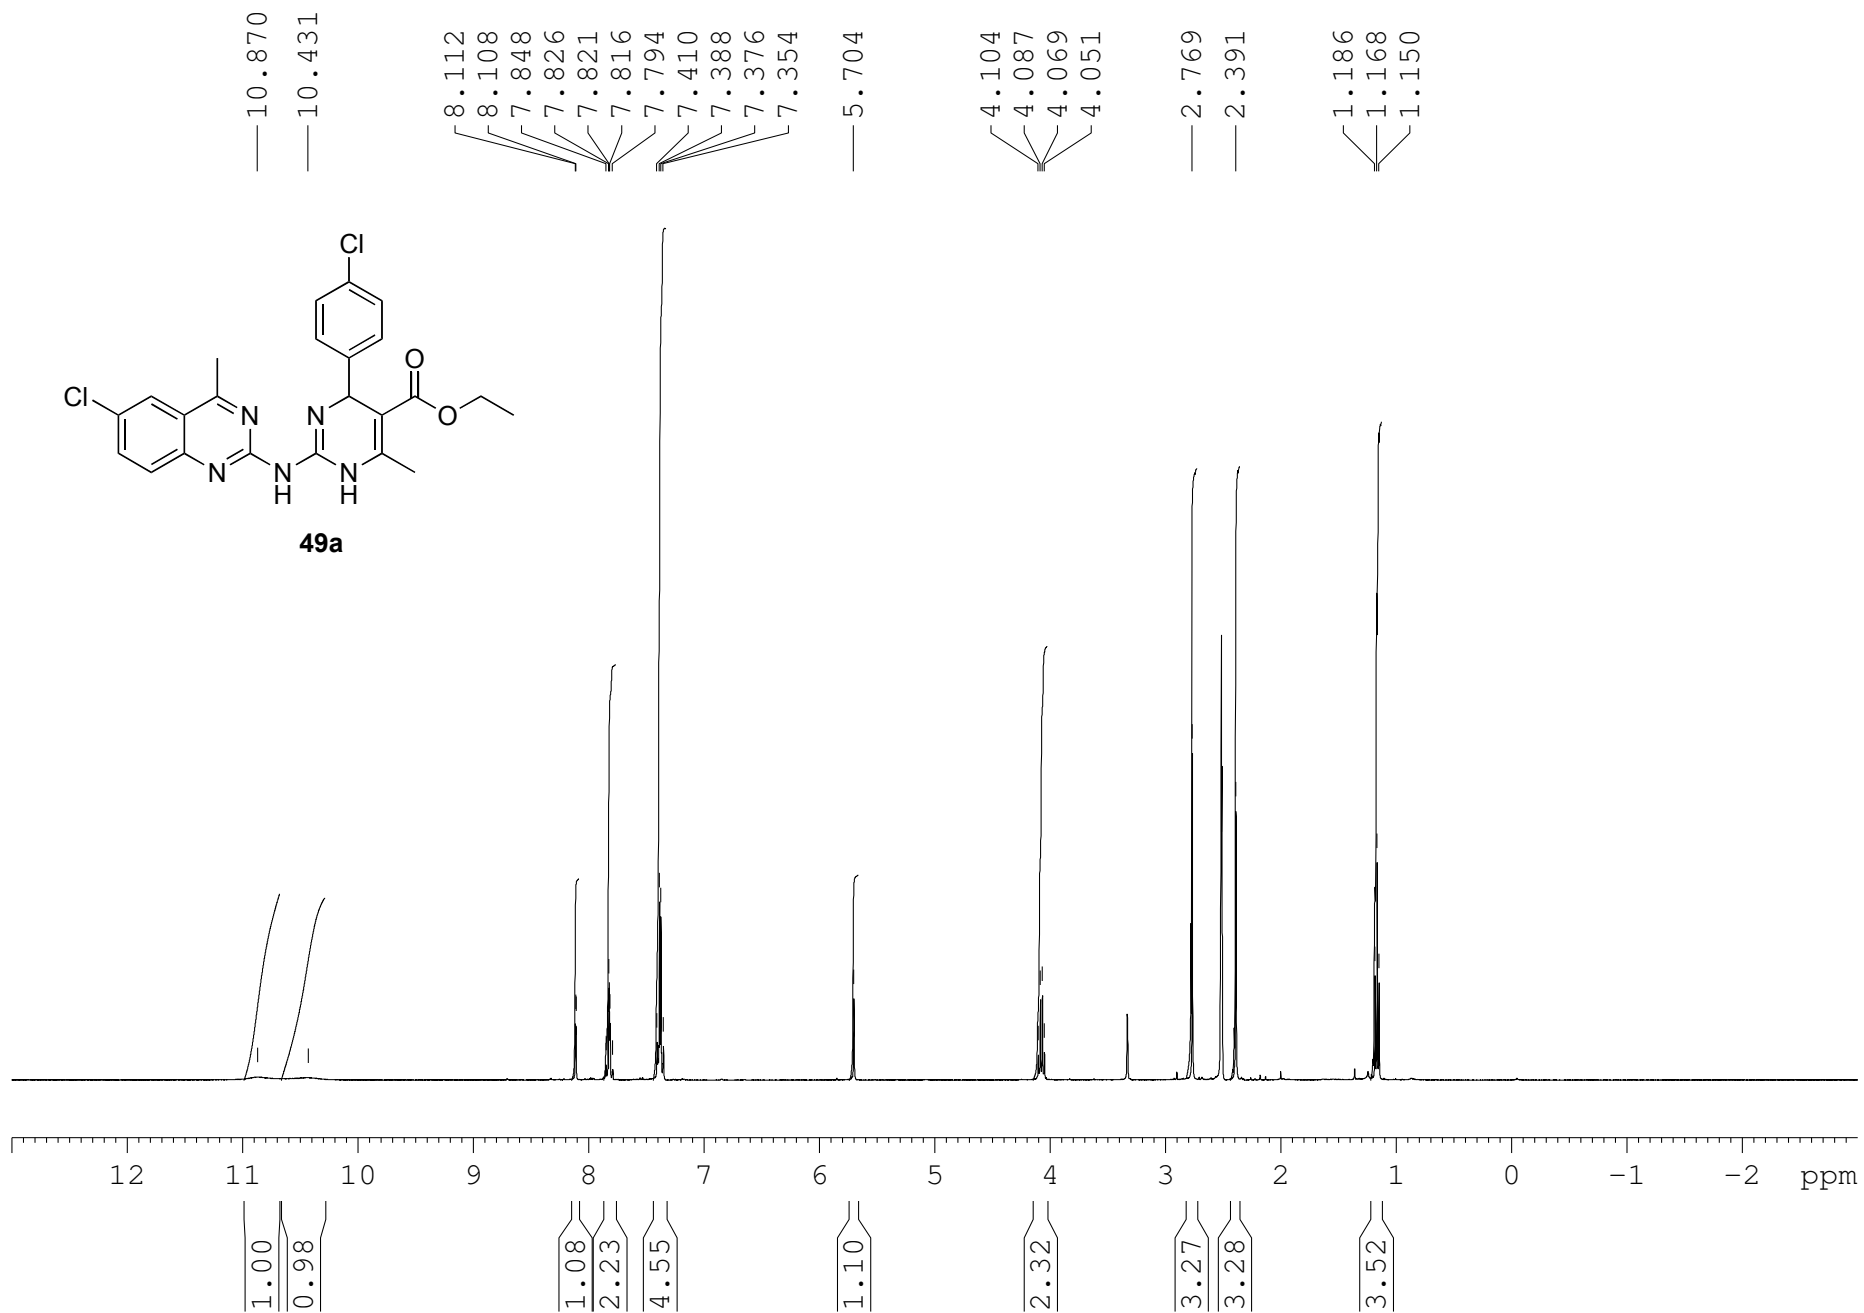

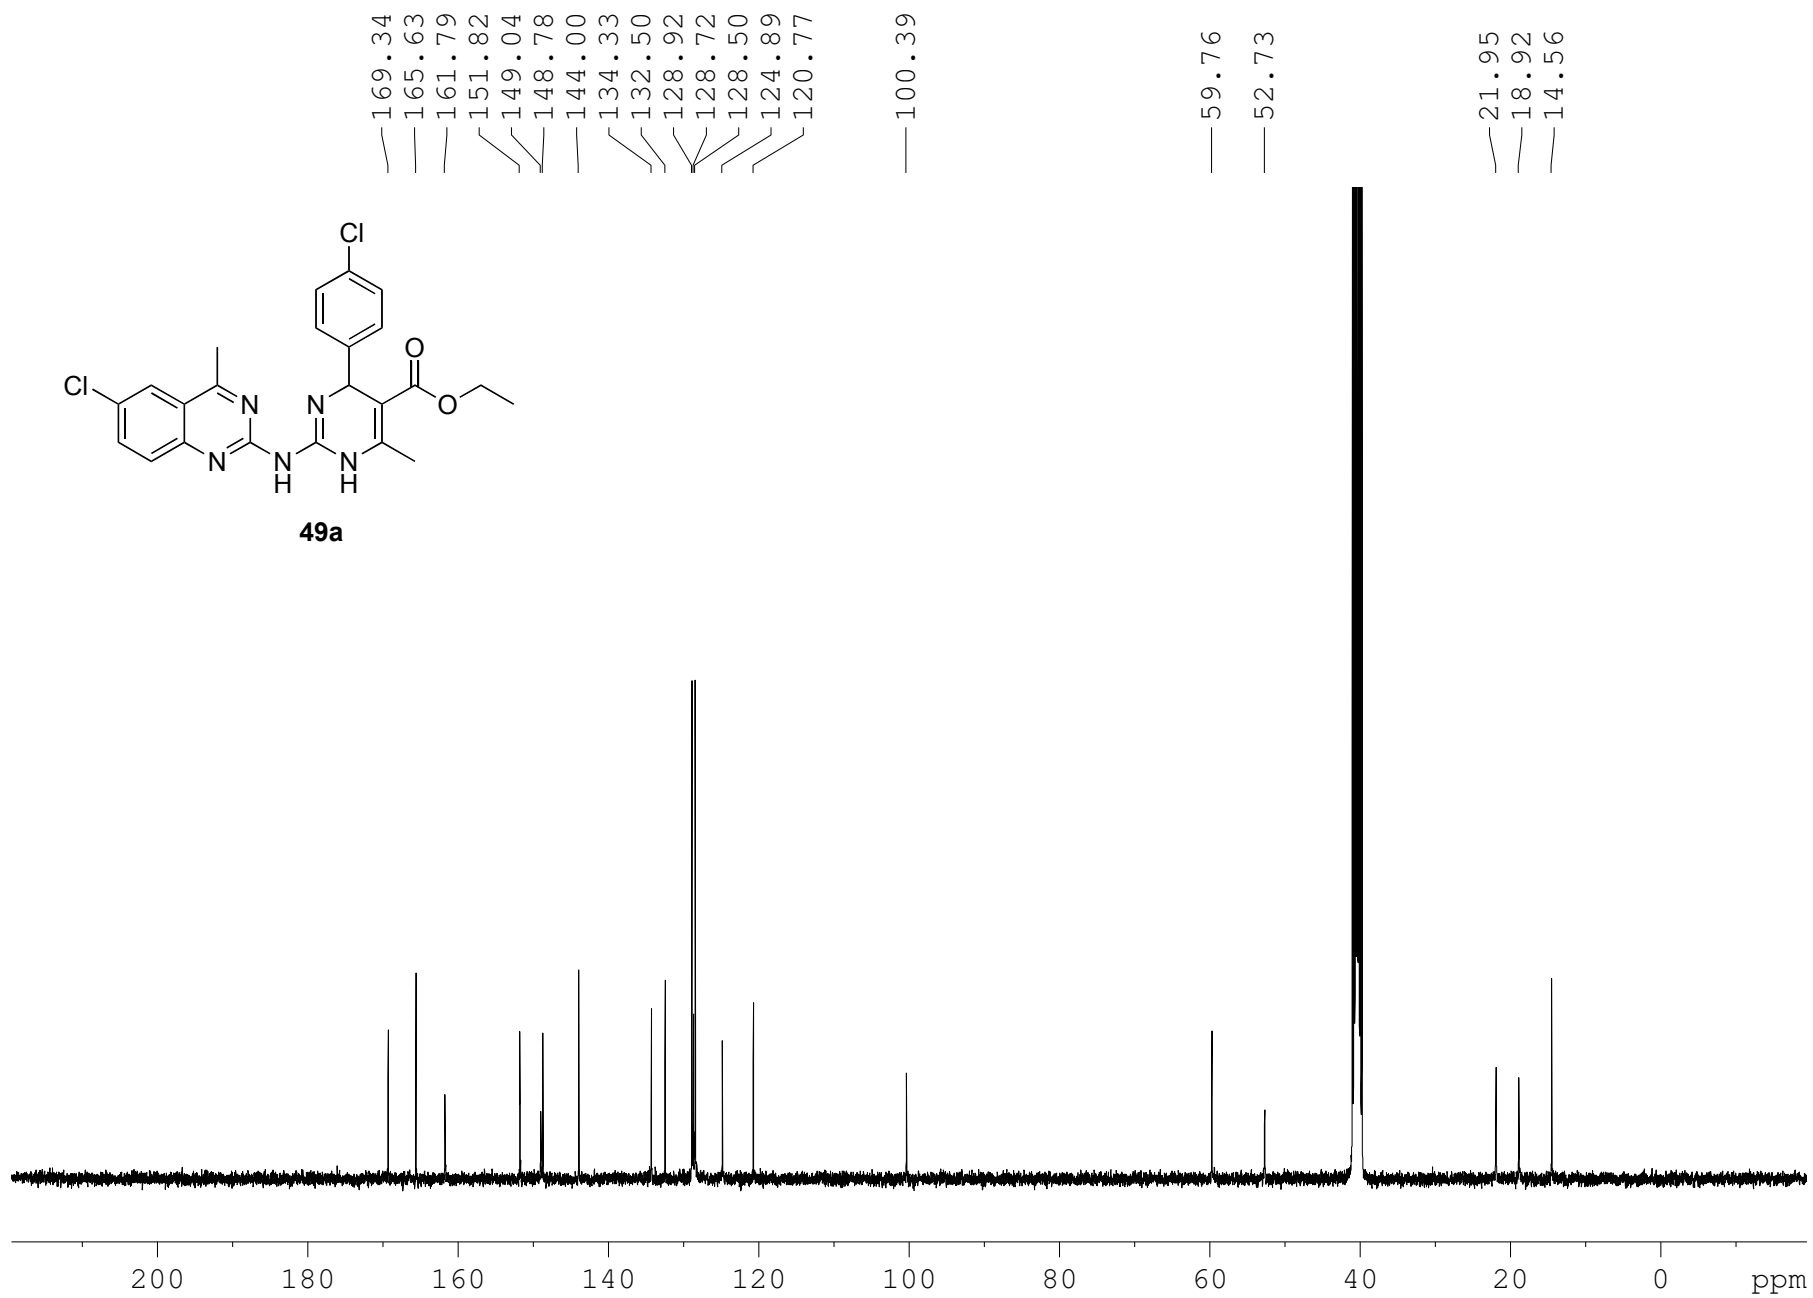

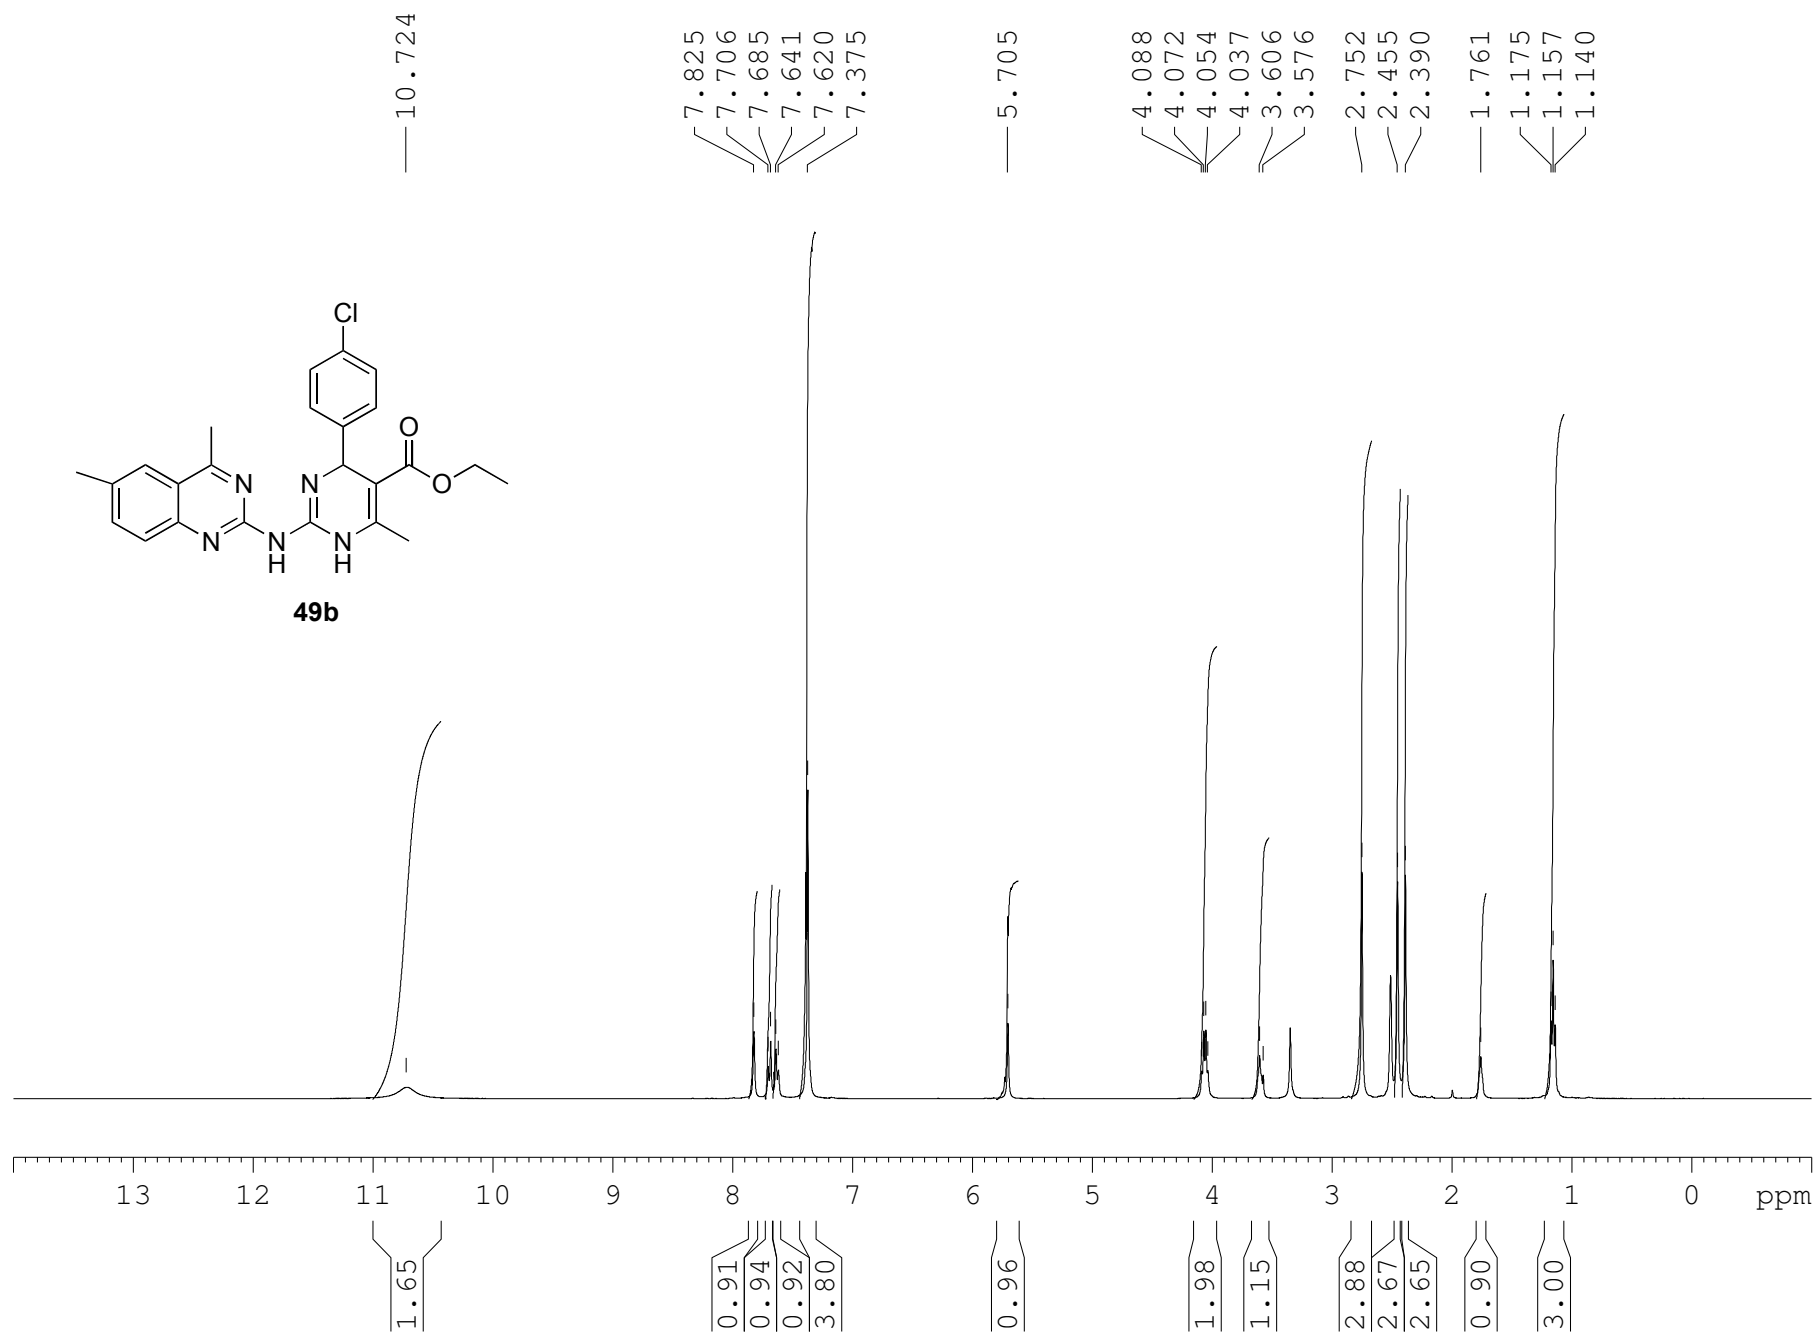

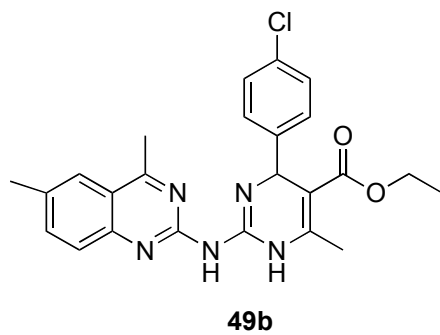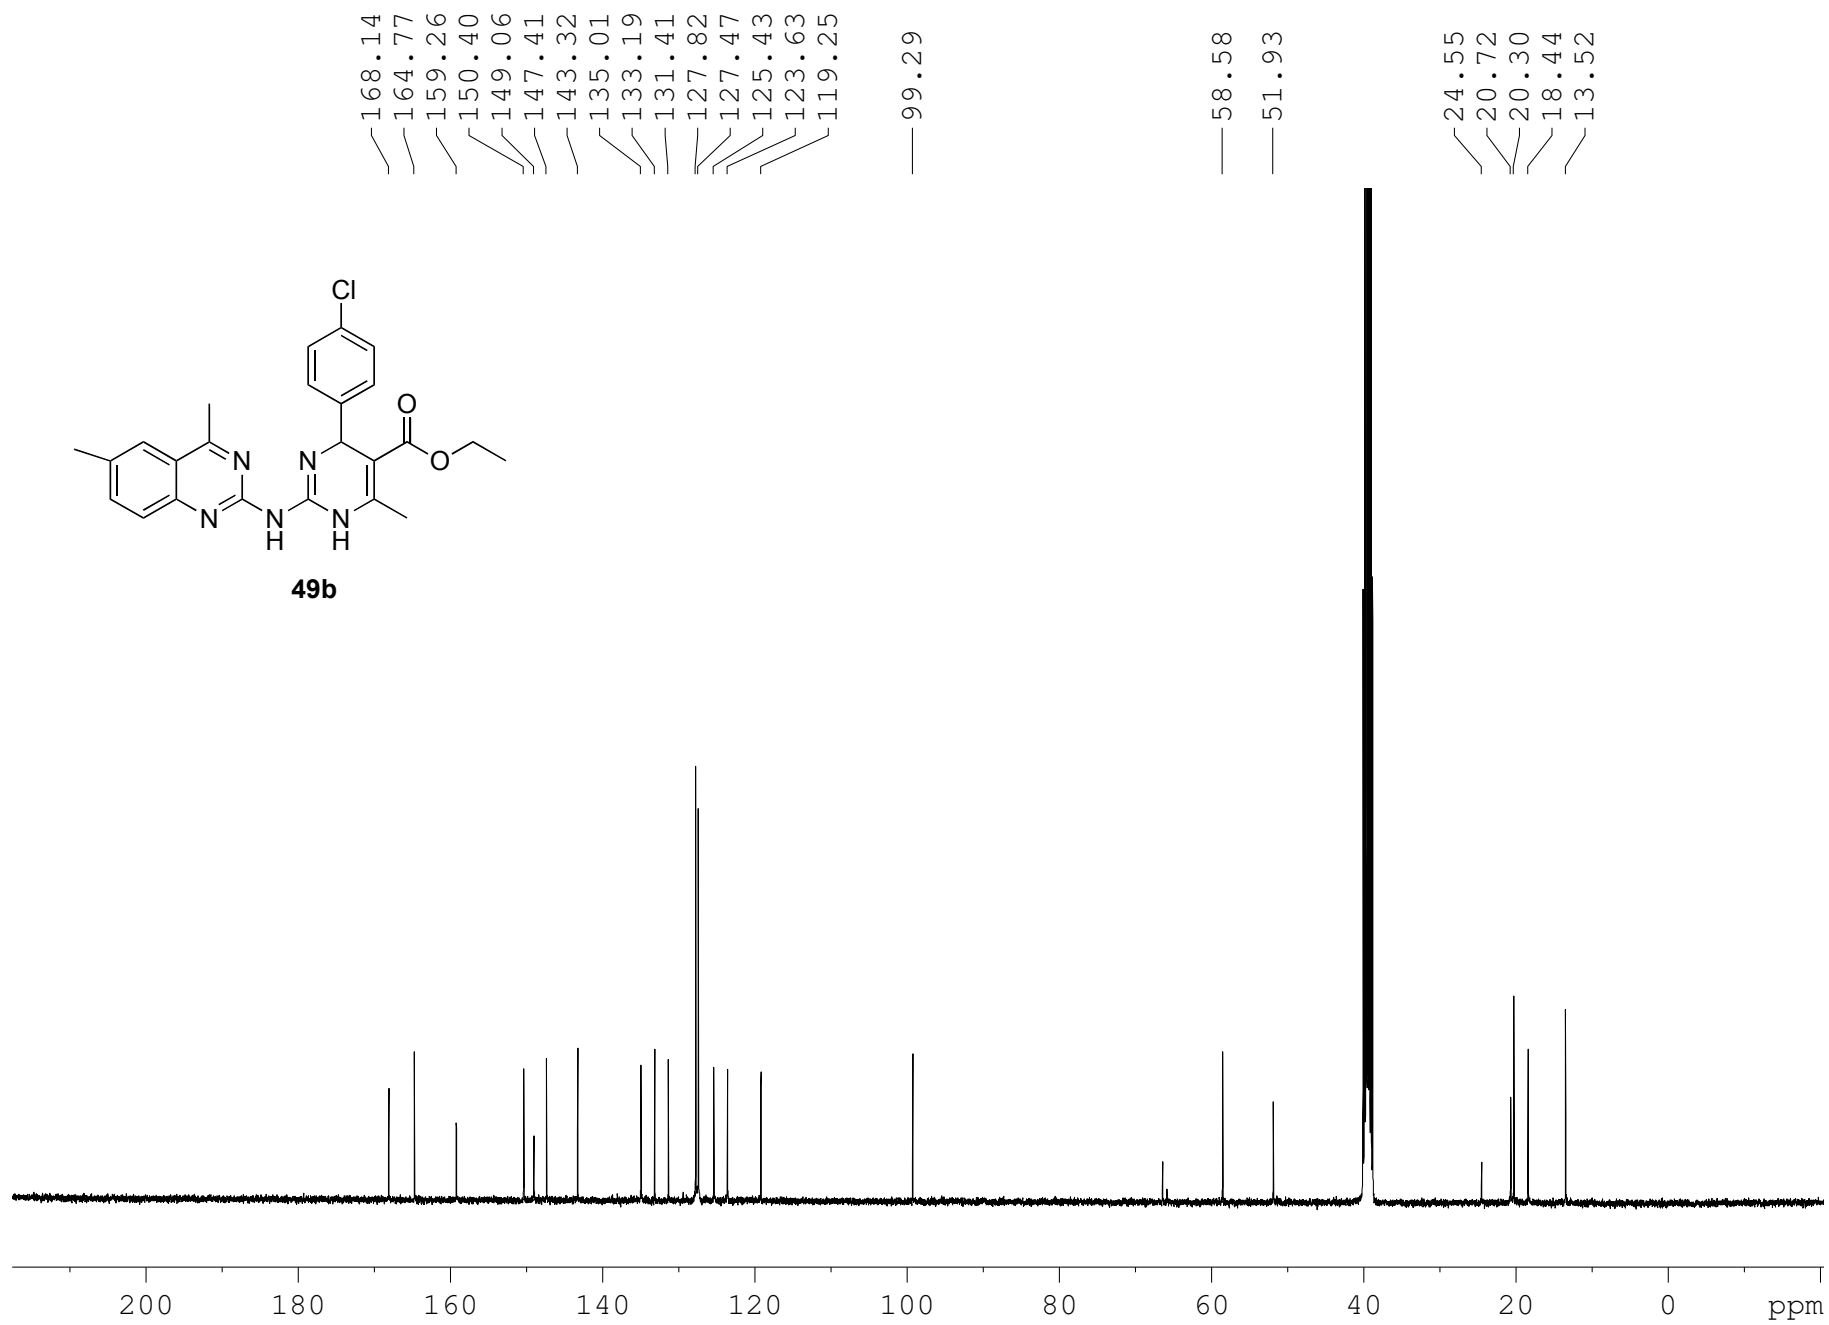



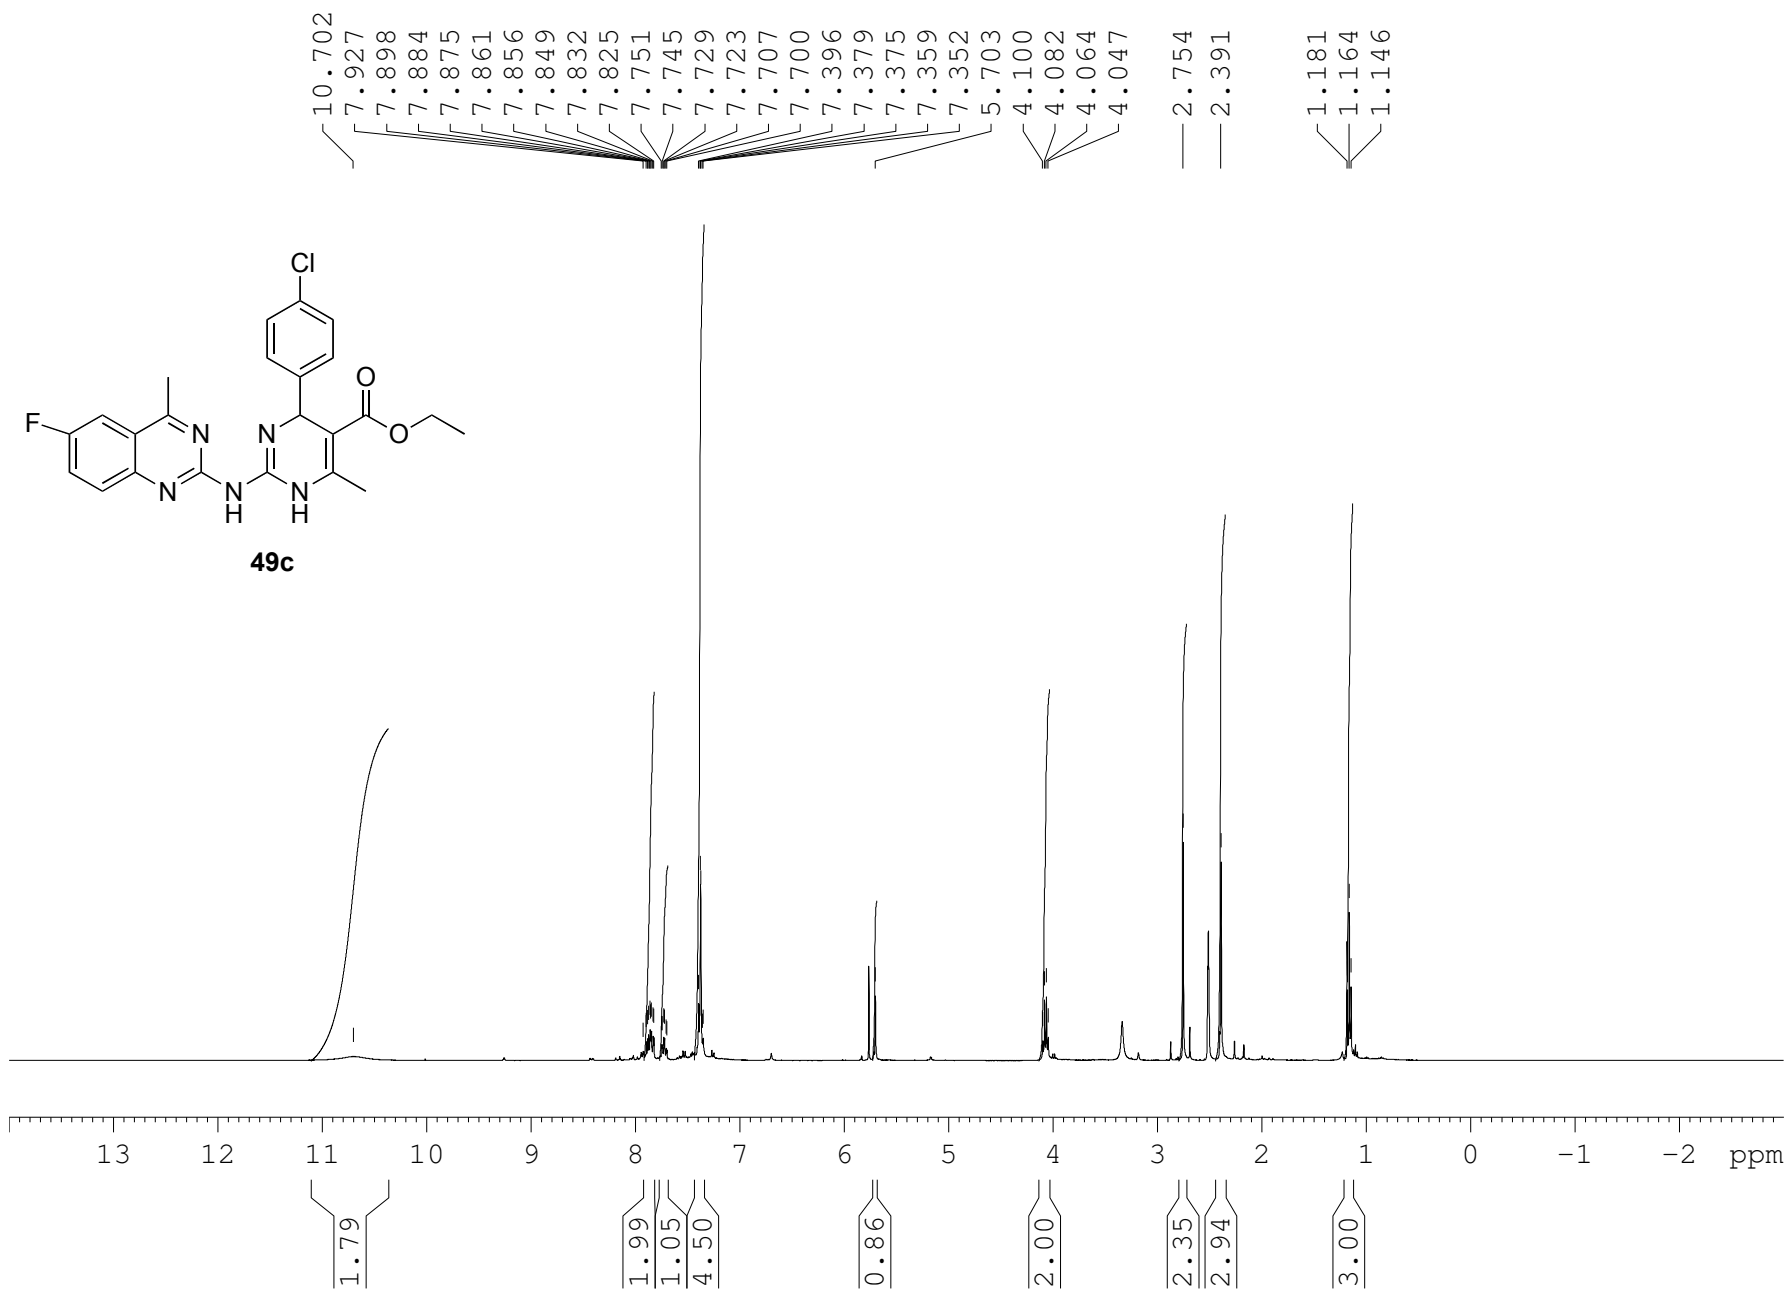

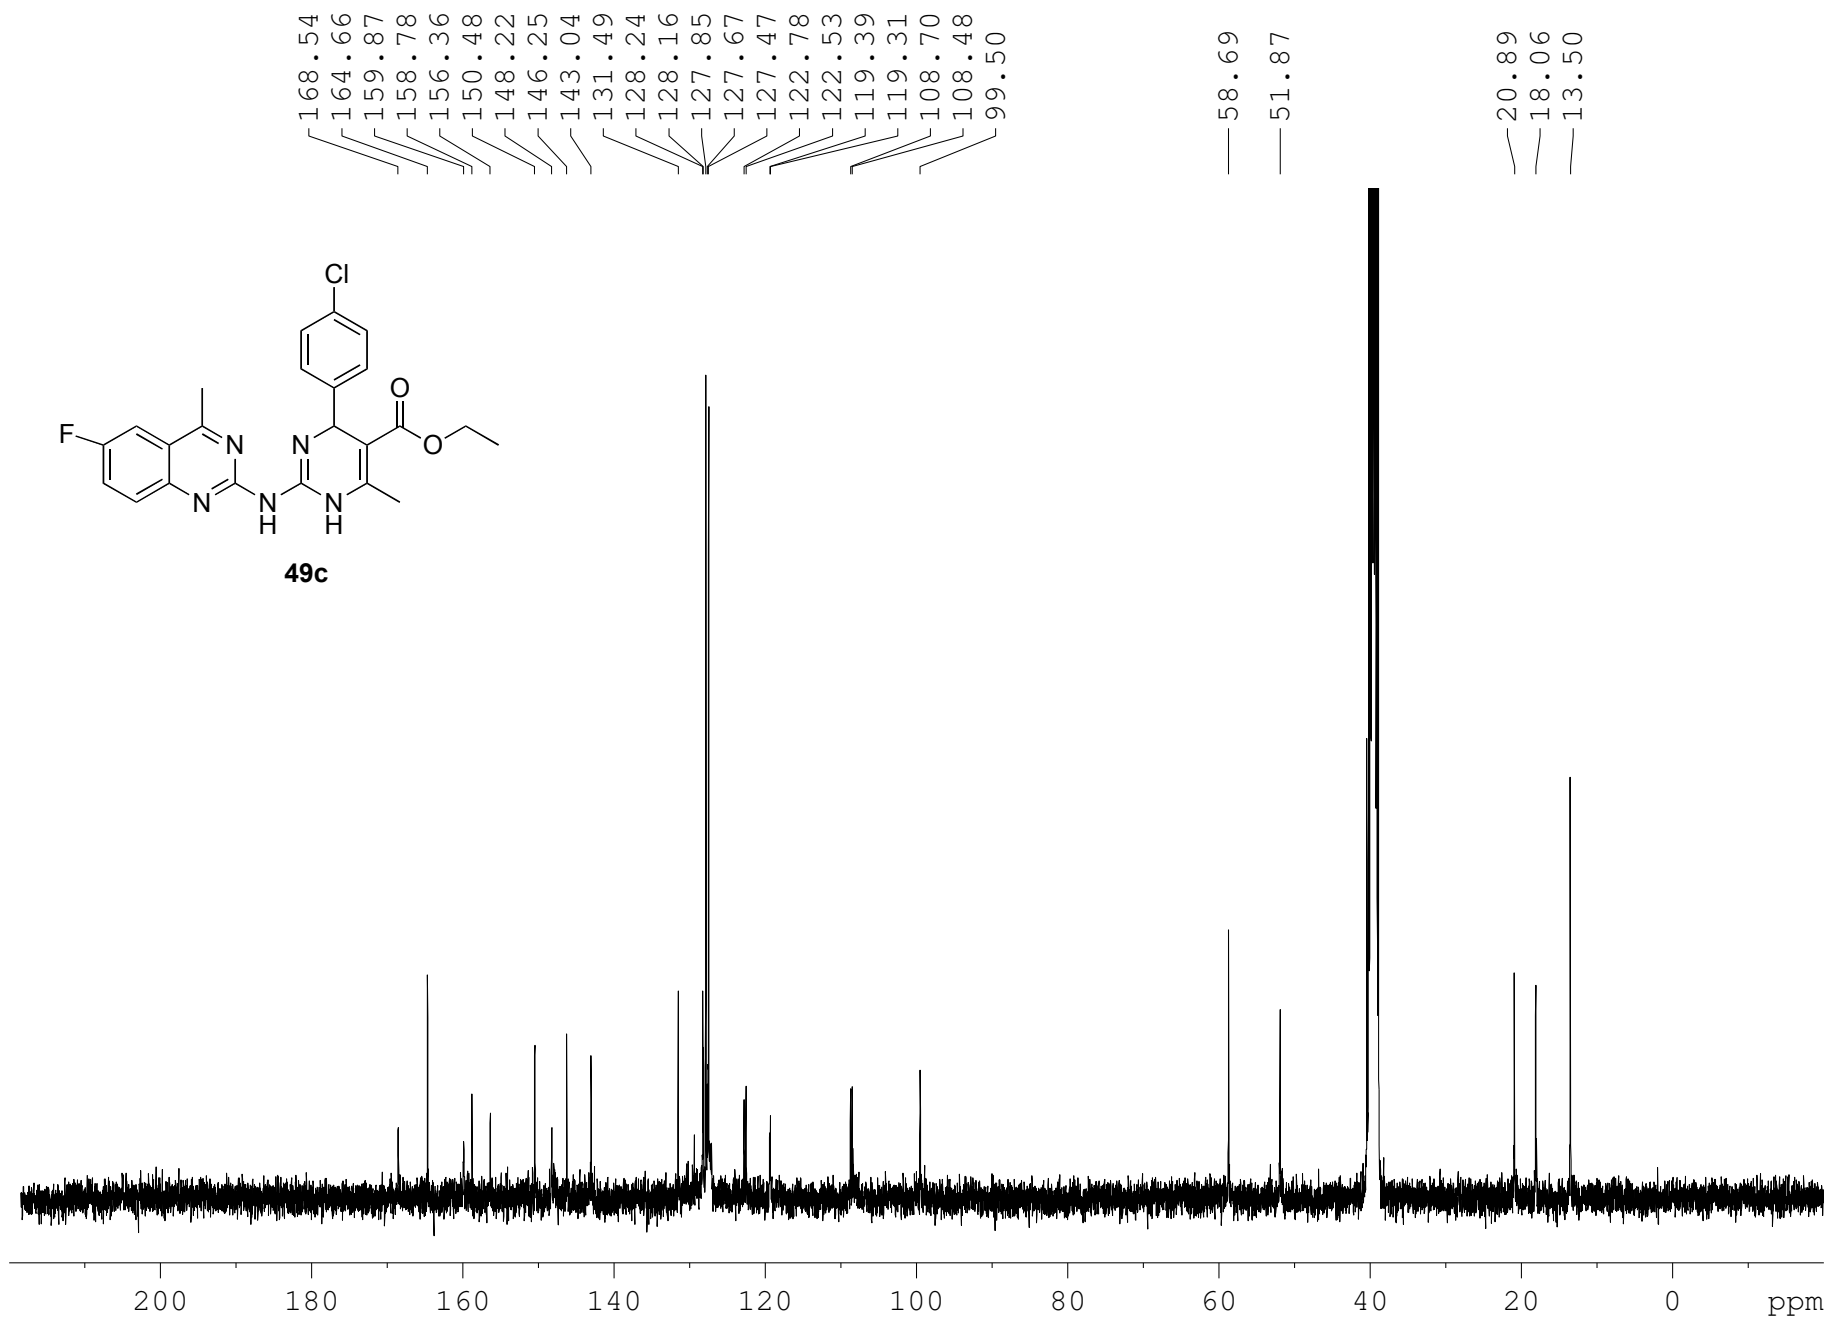

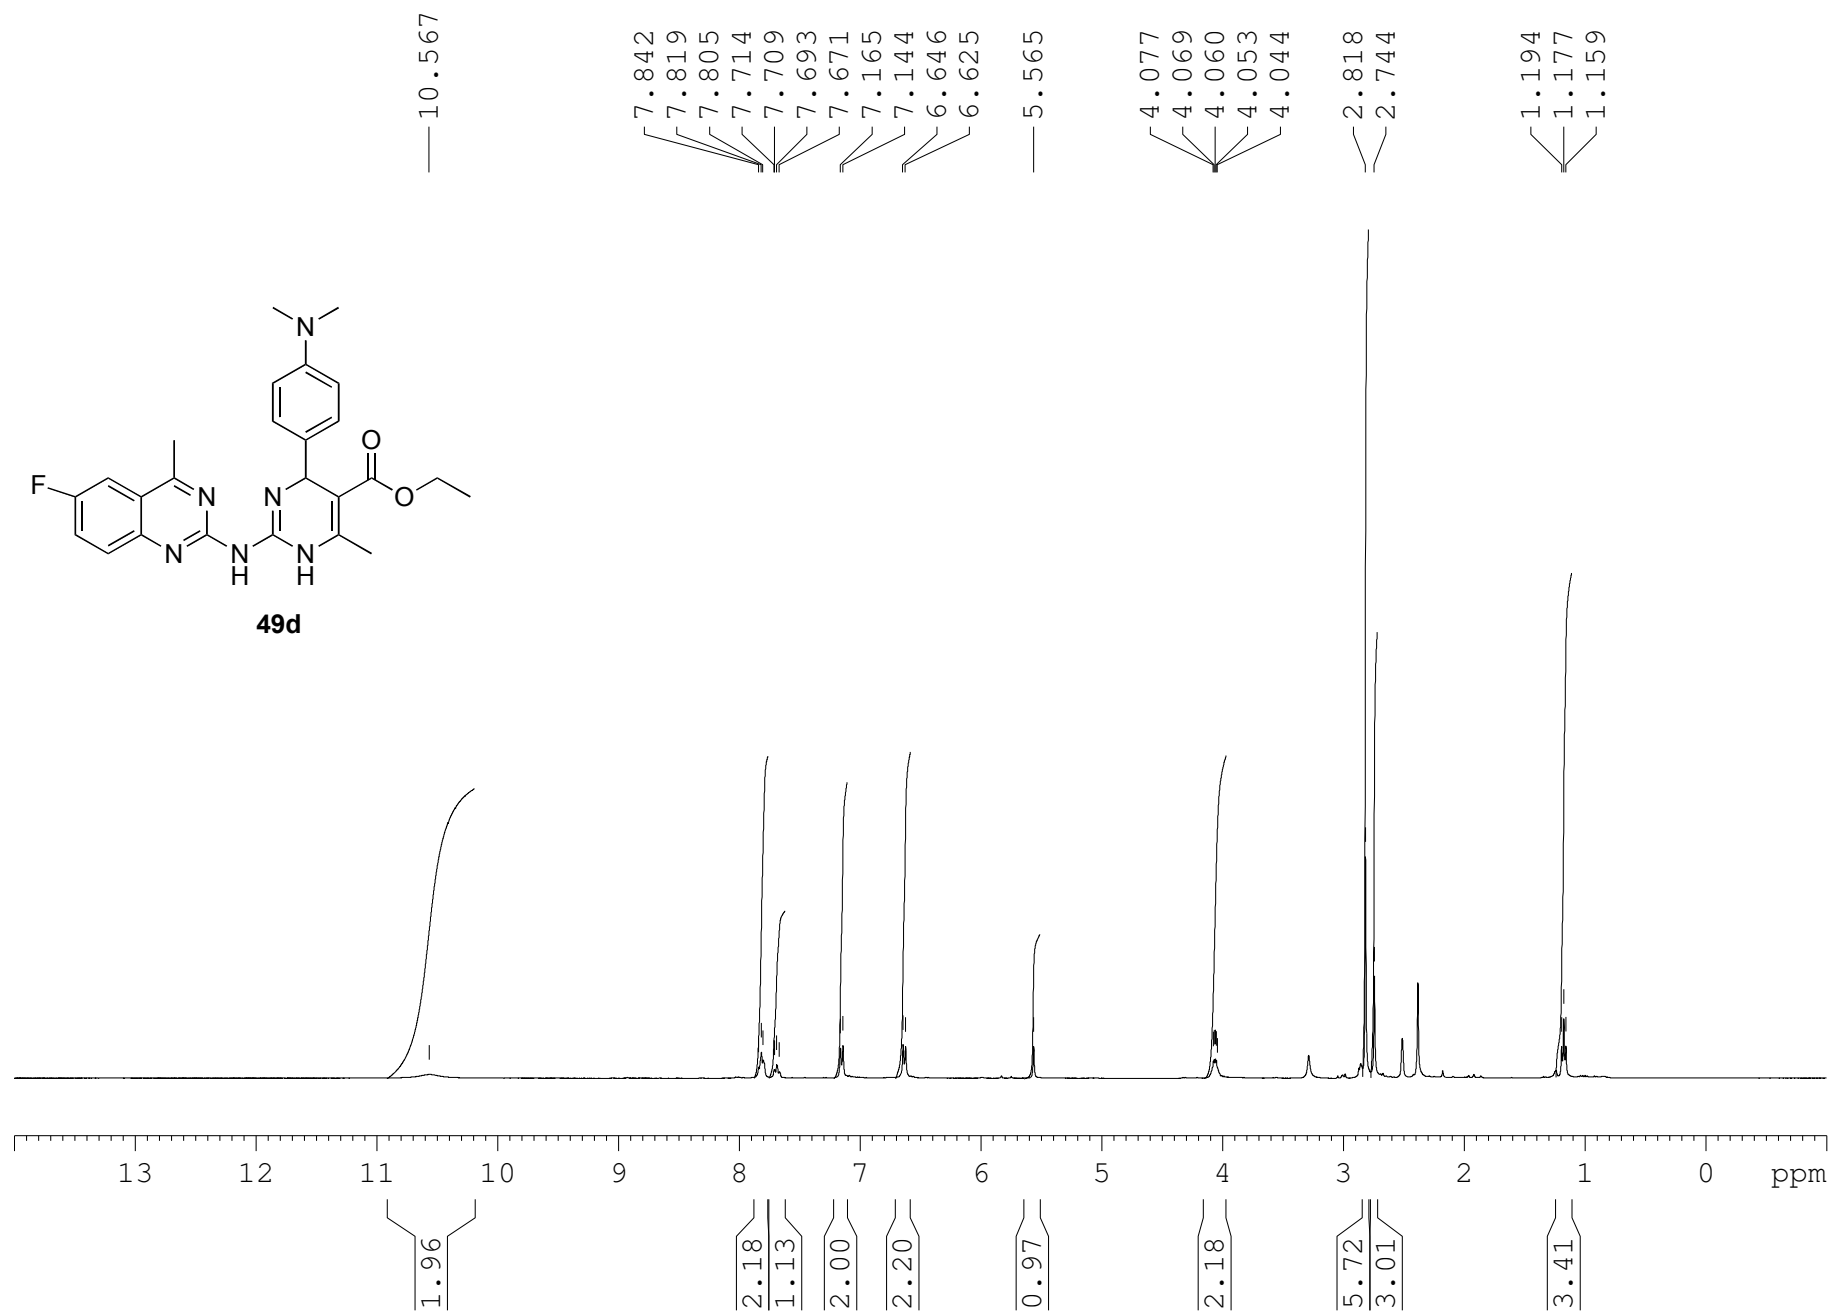

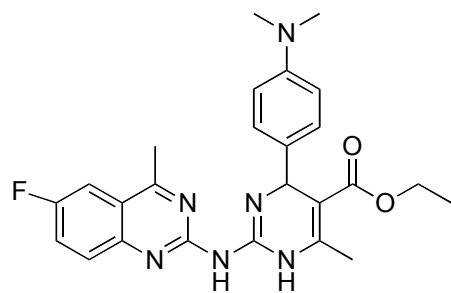

49d

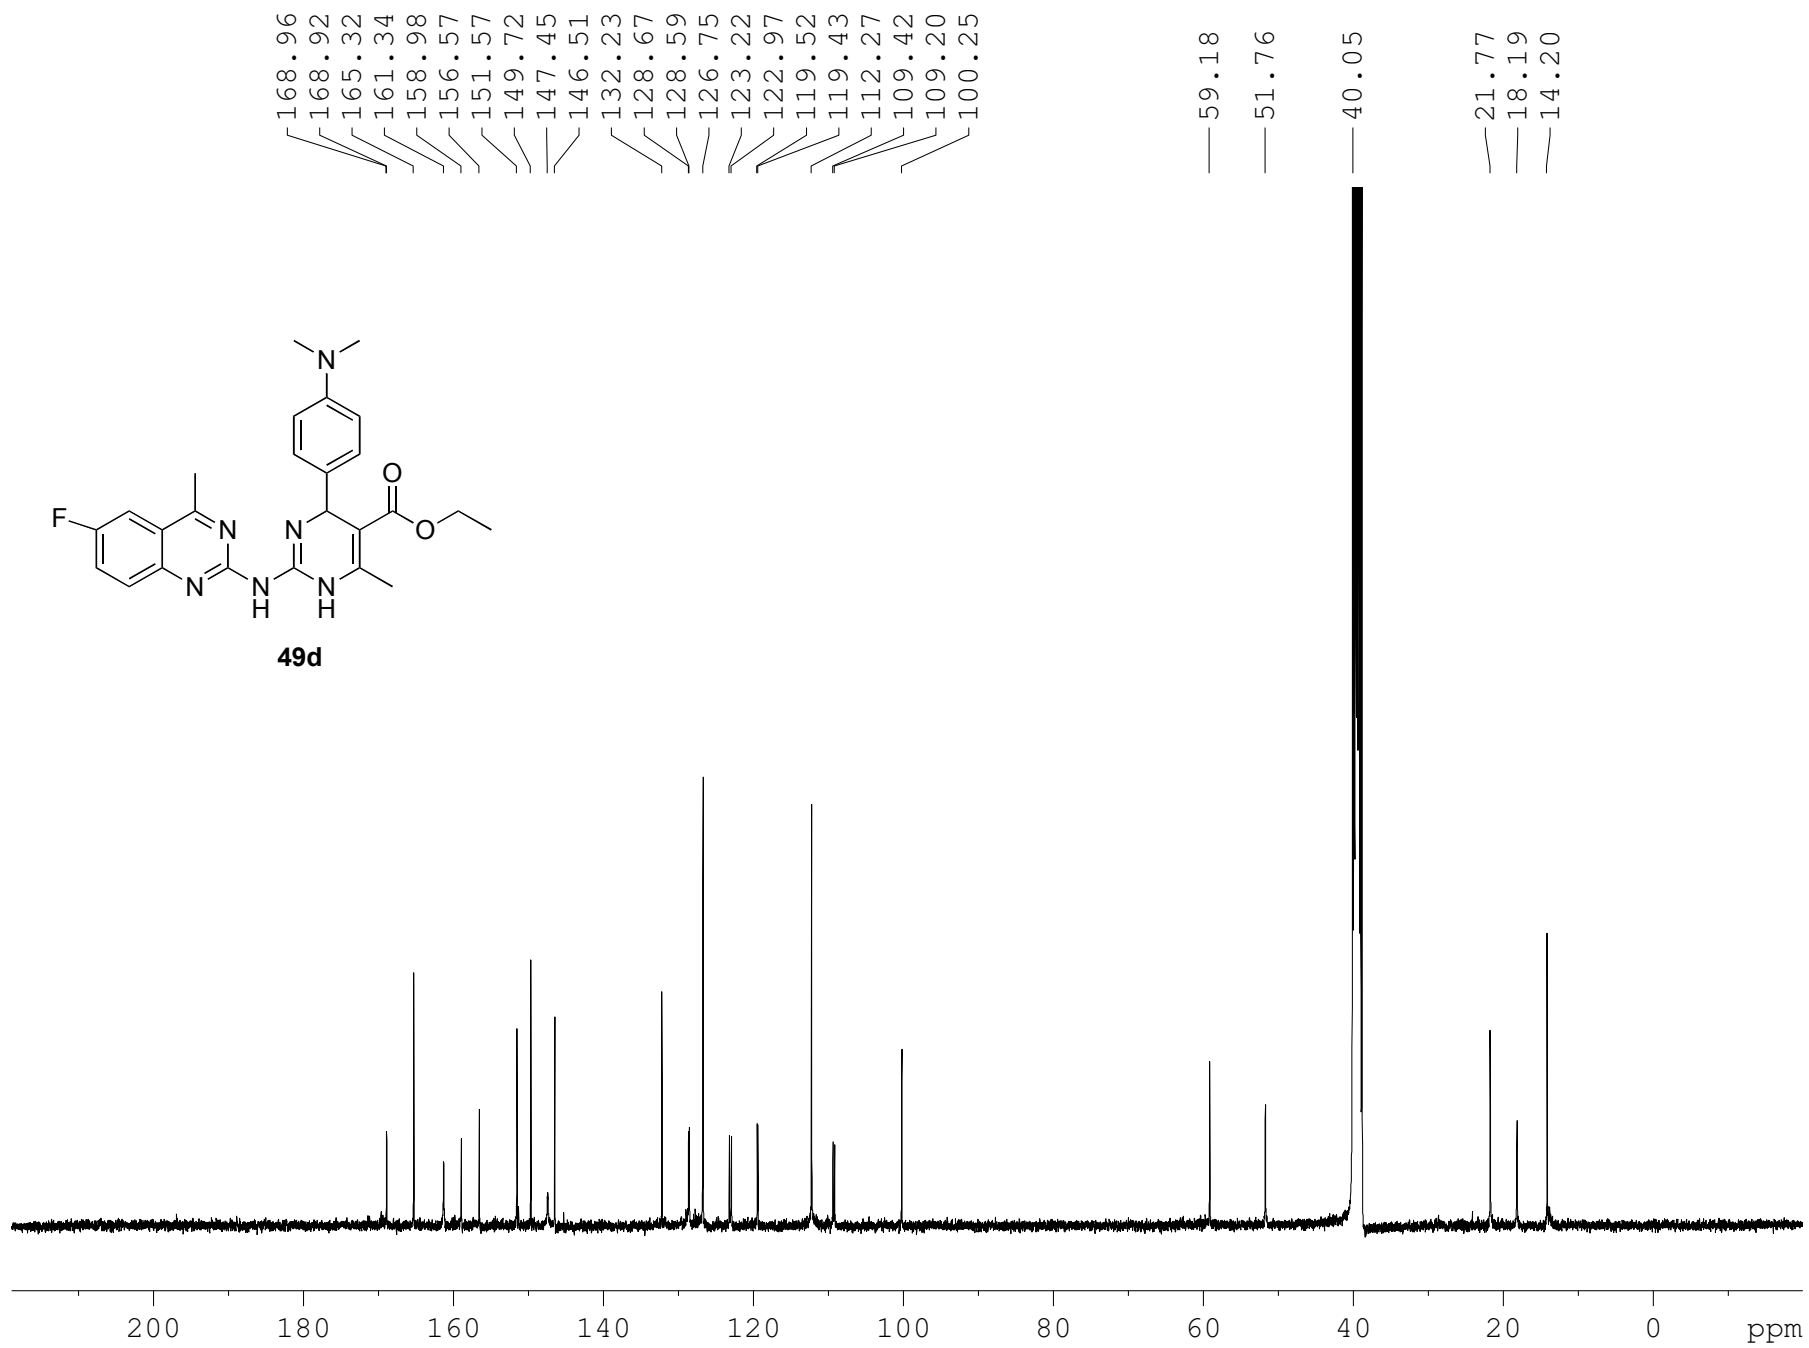

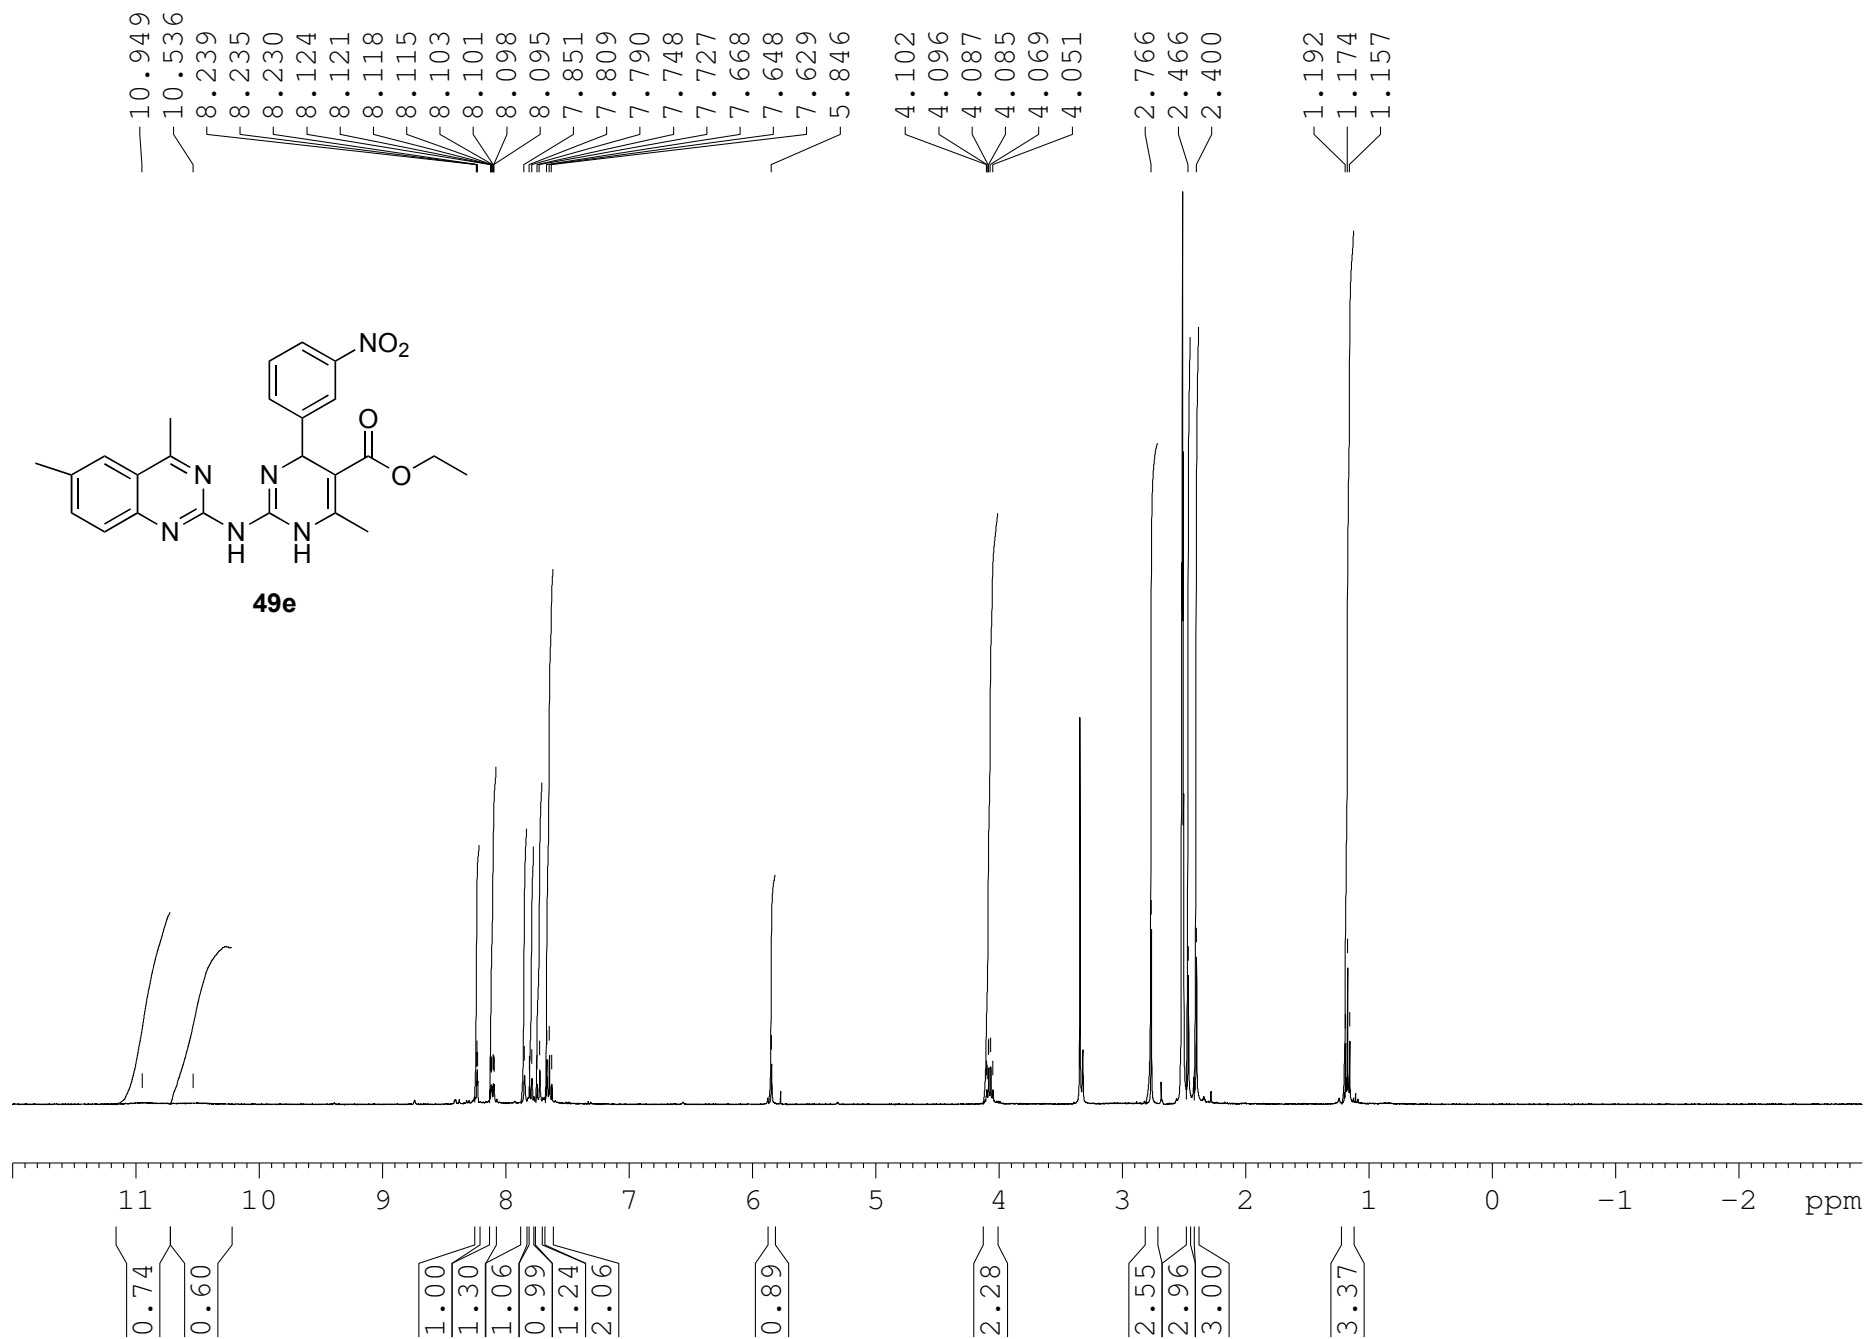

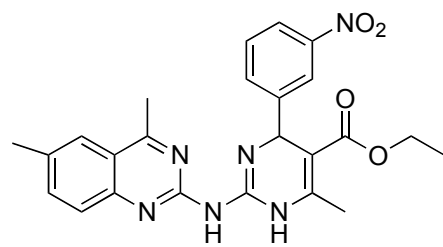

49e

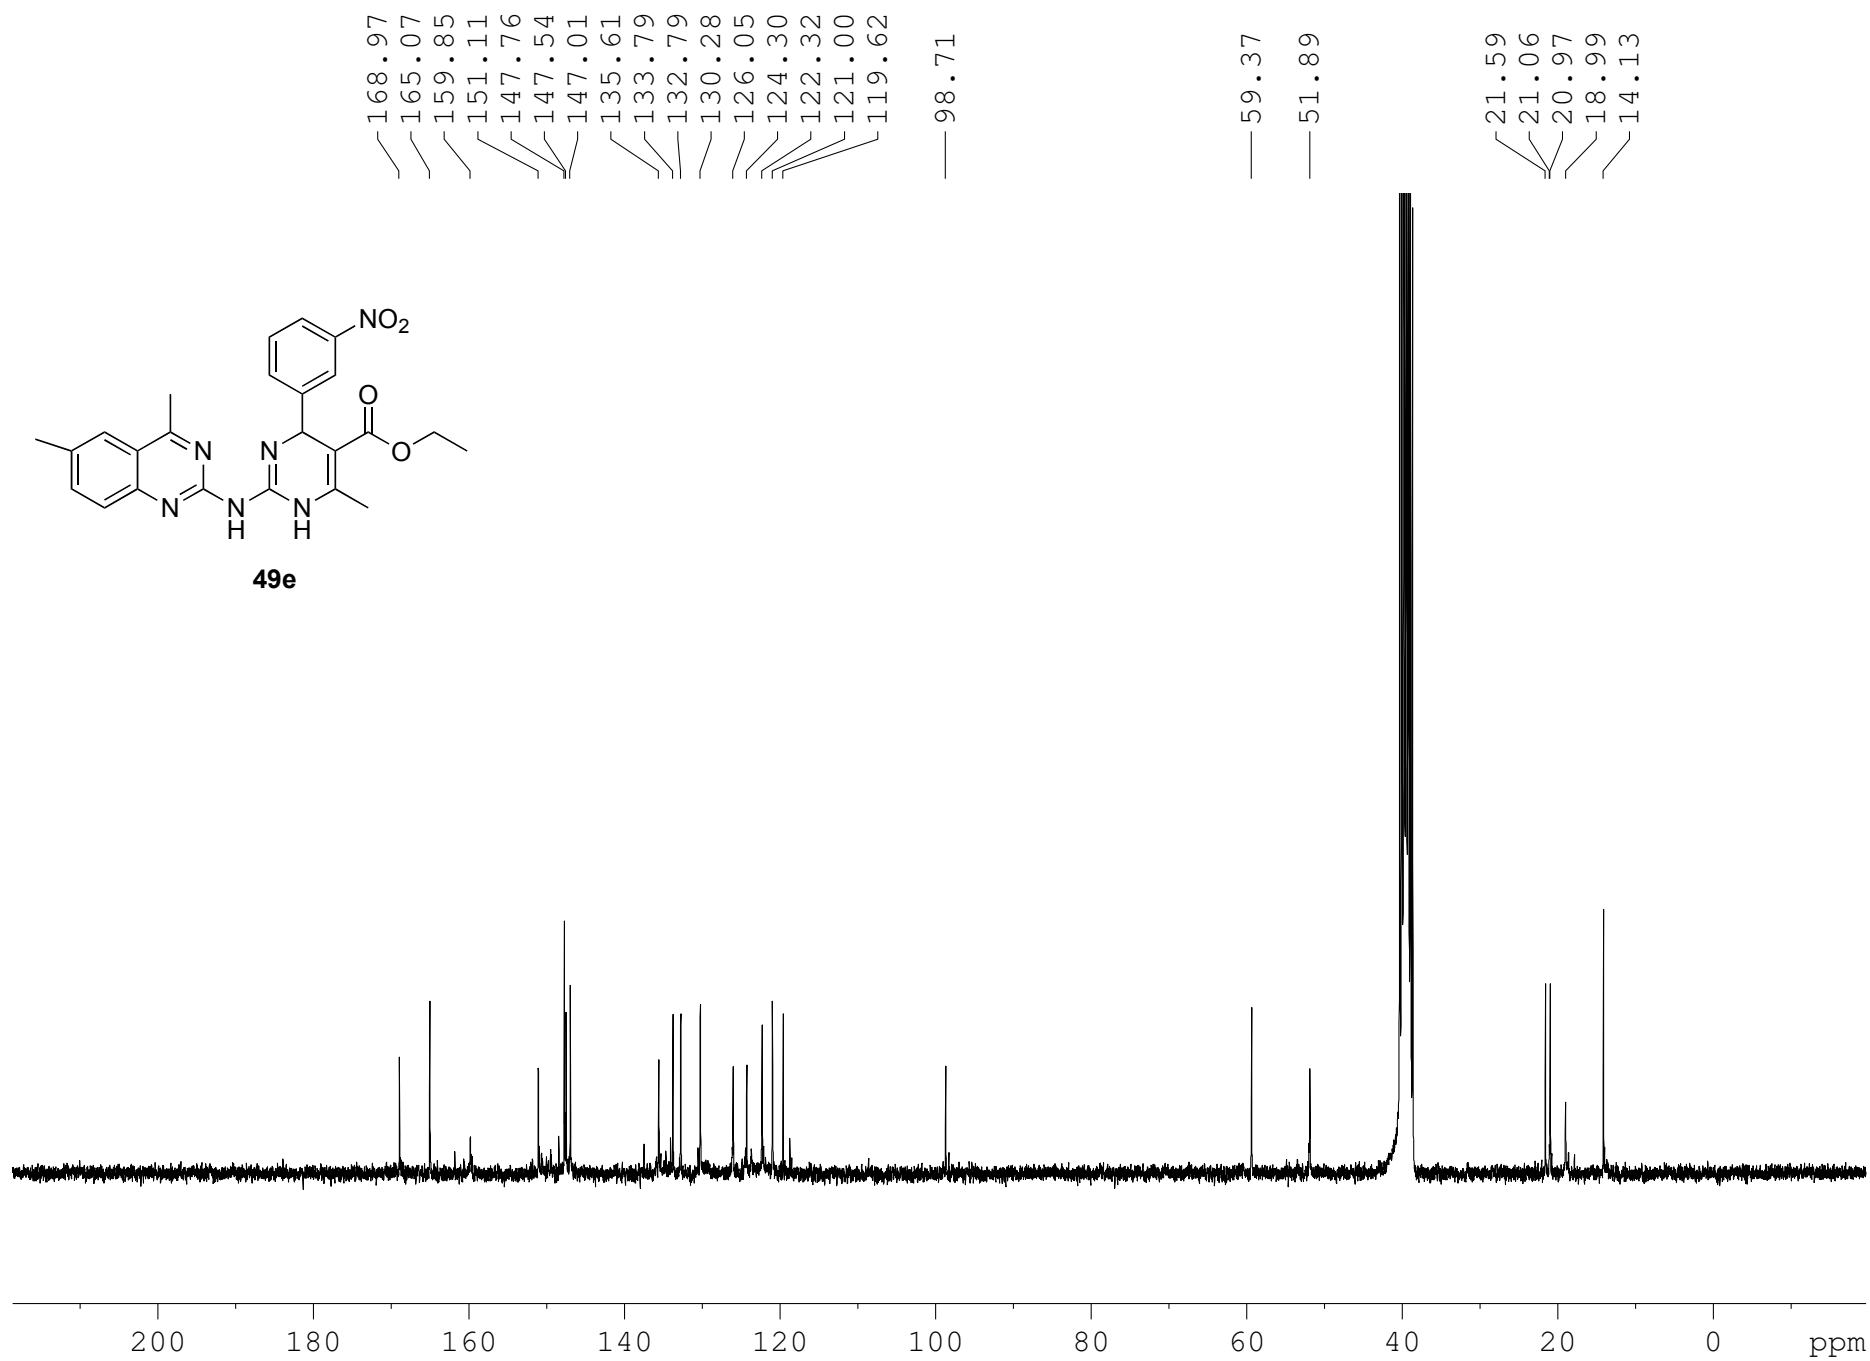

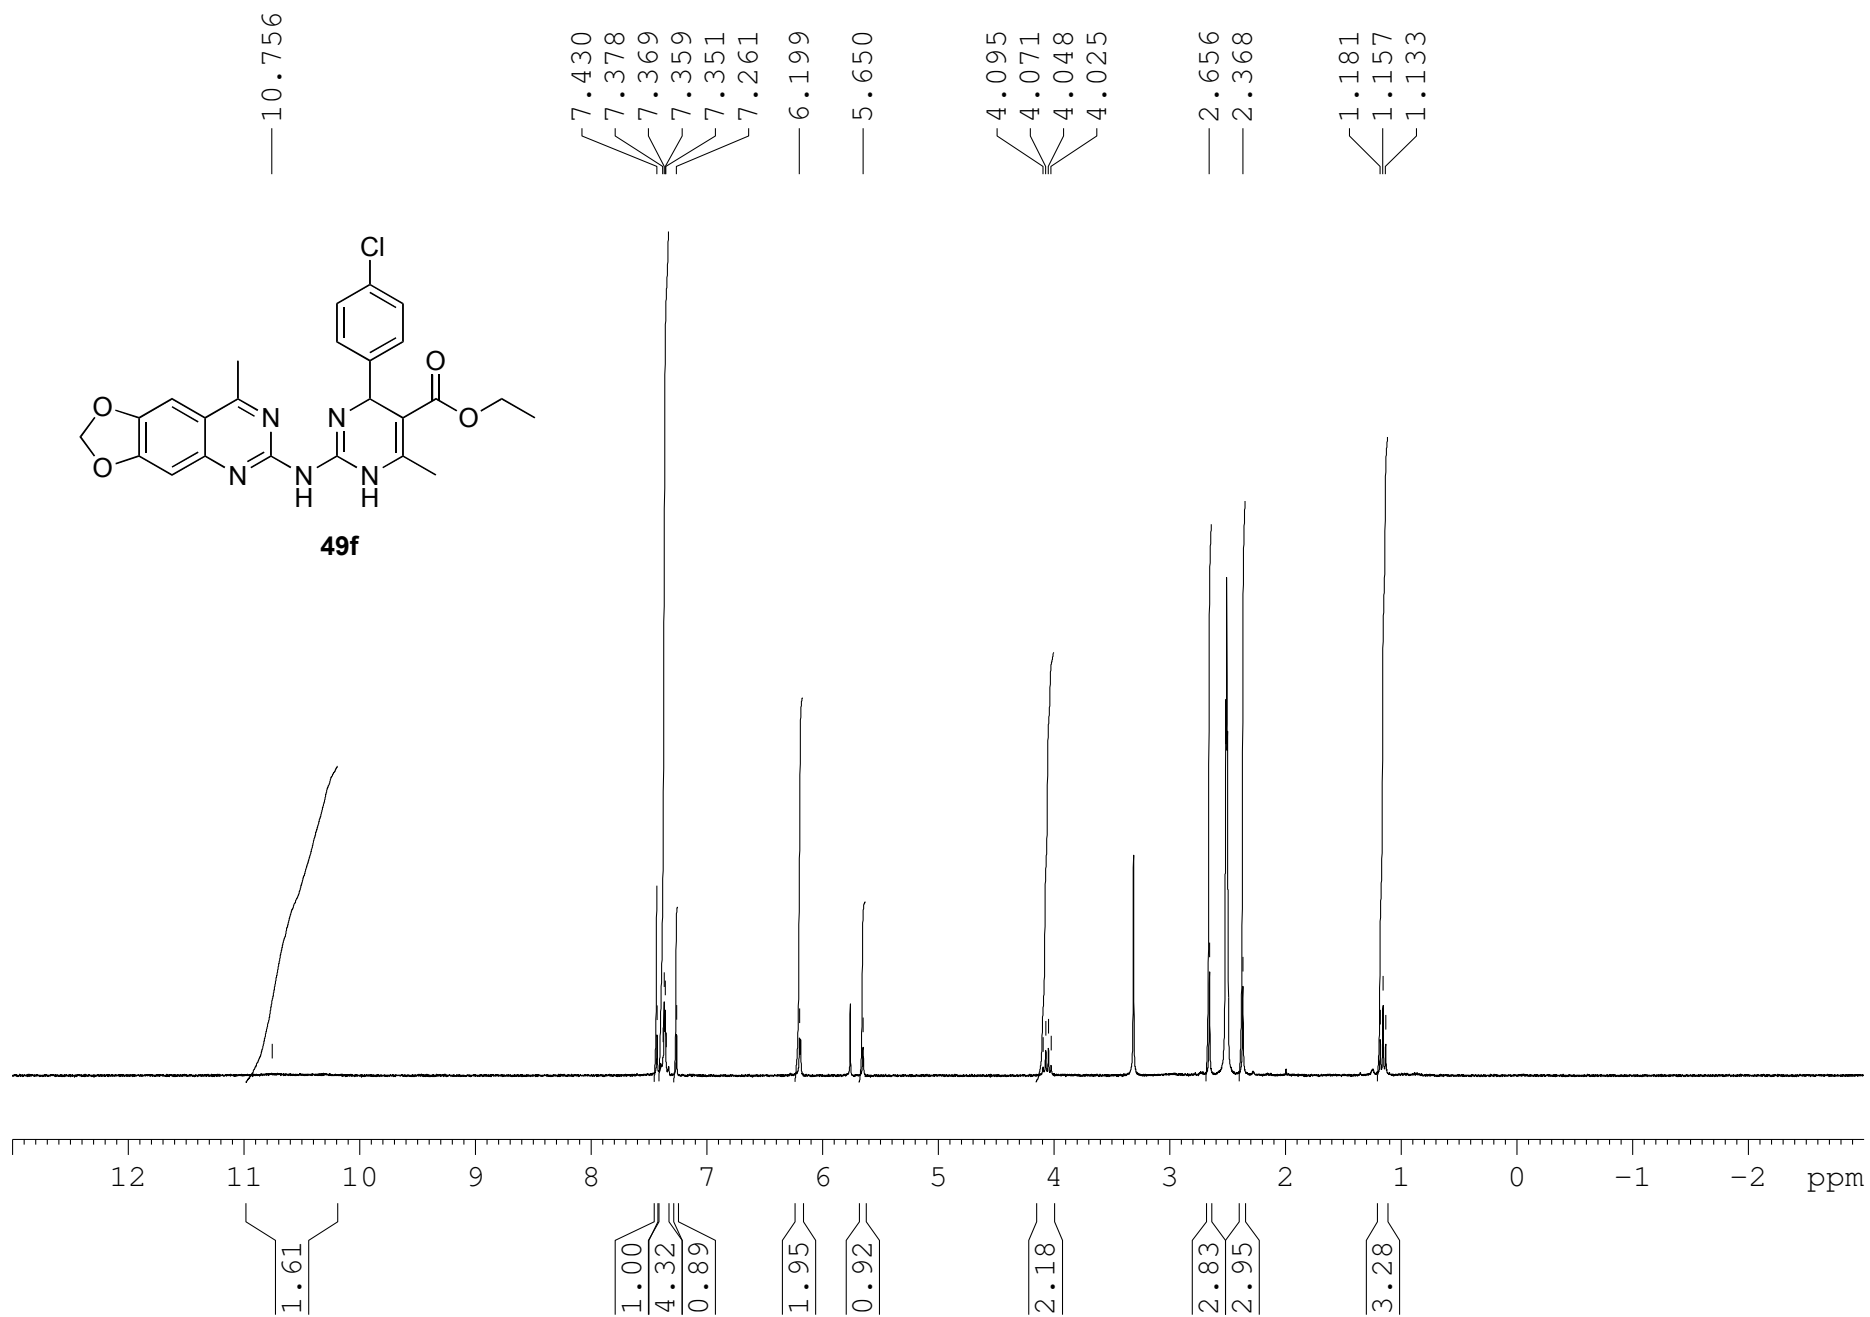

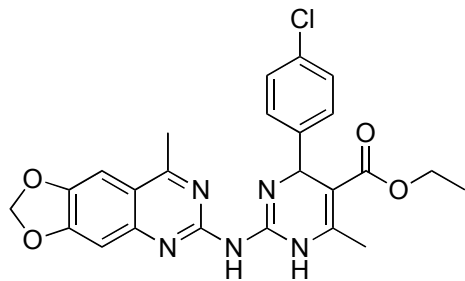**49f**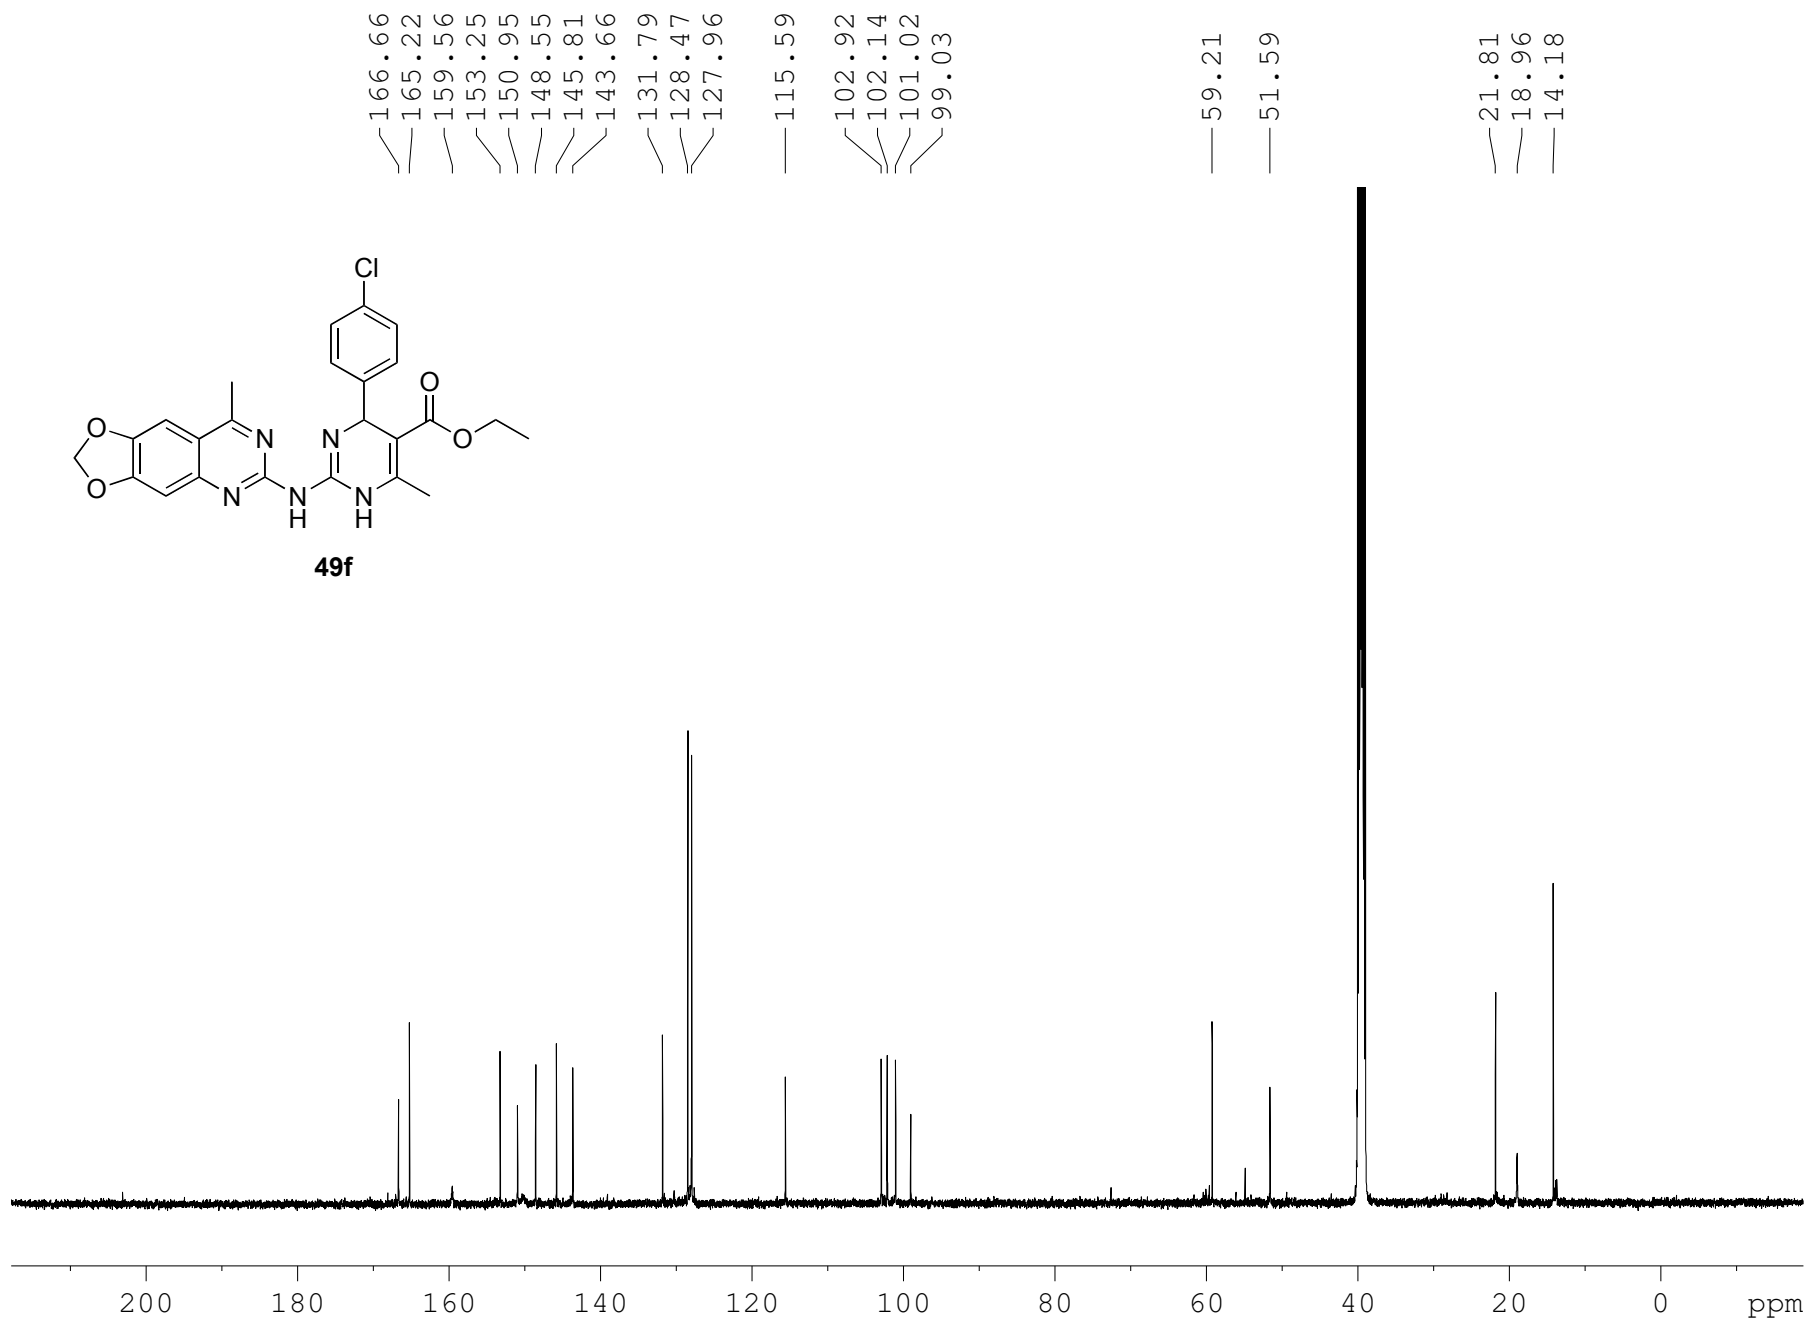



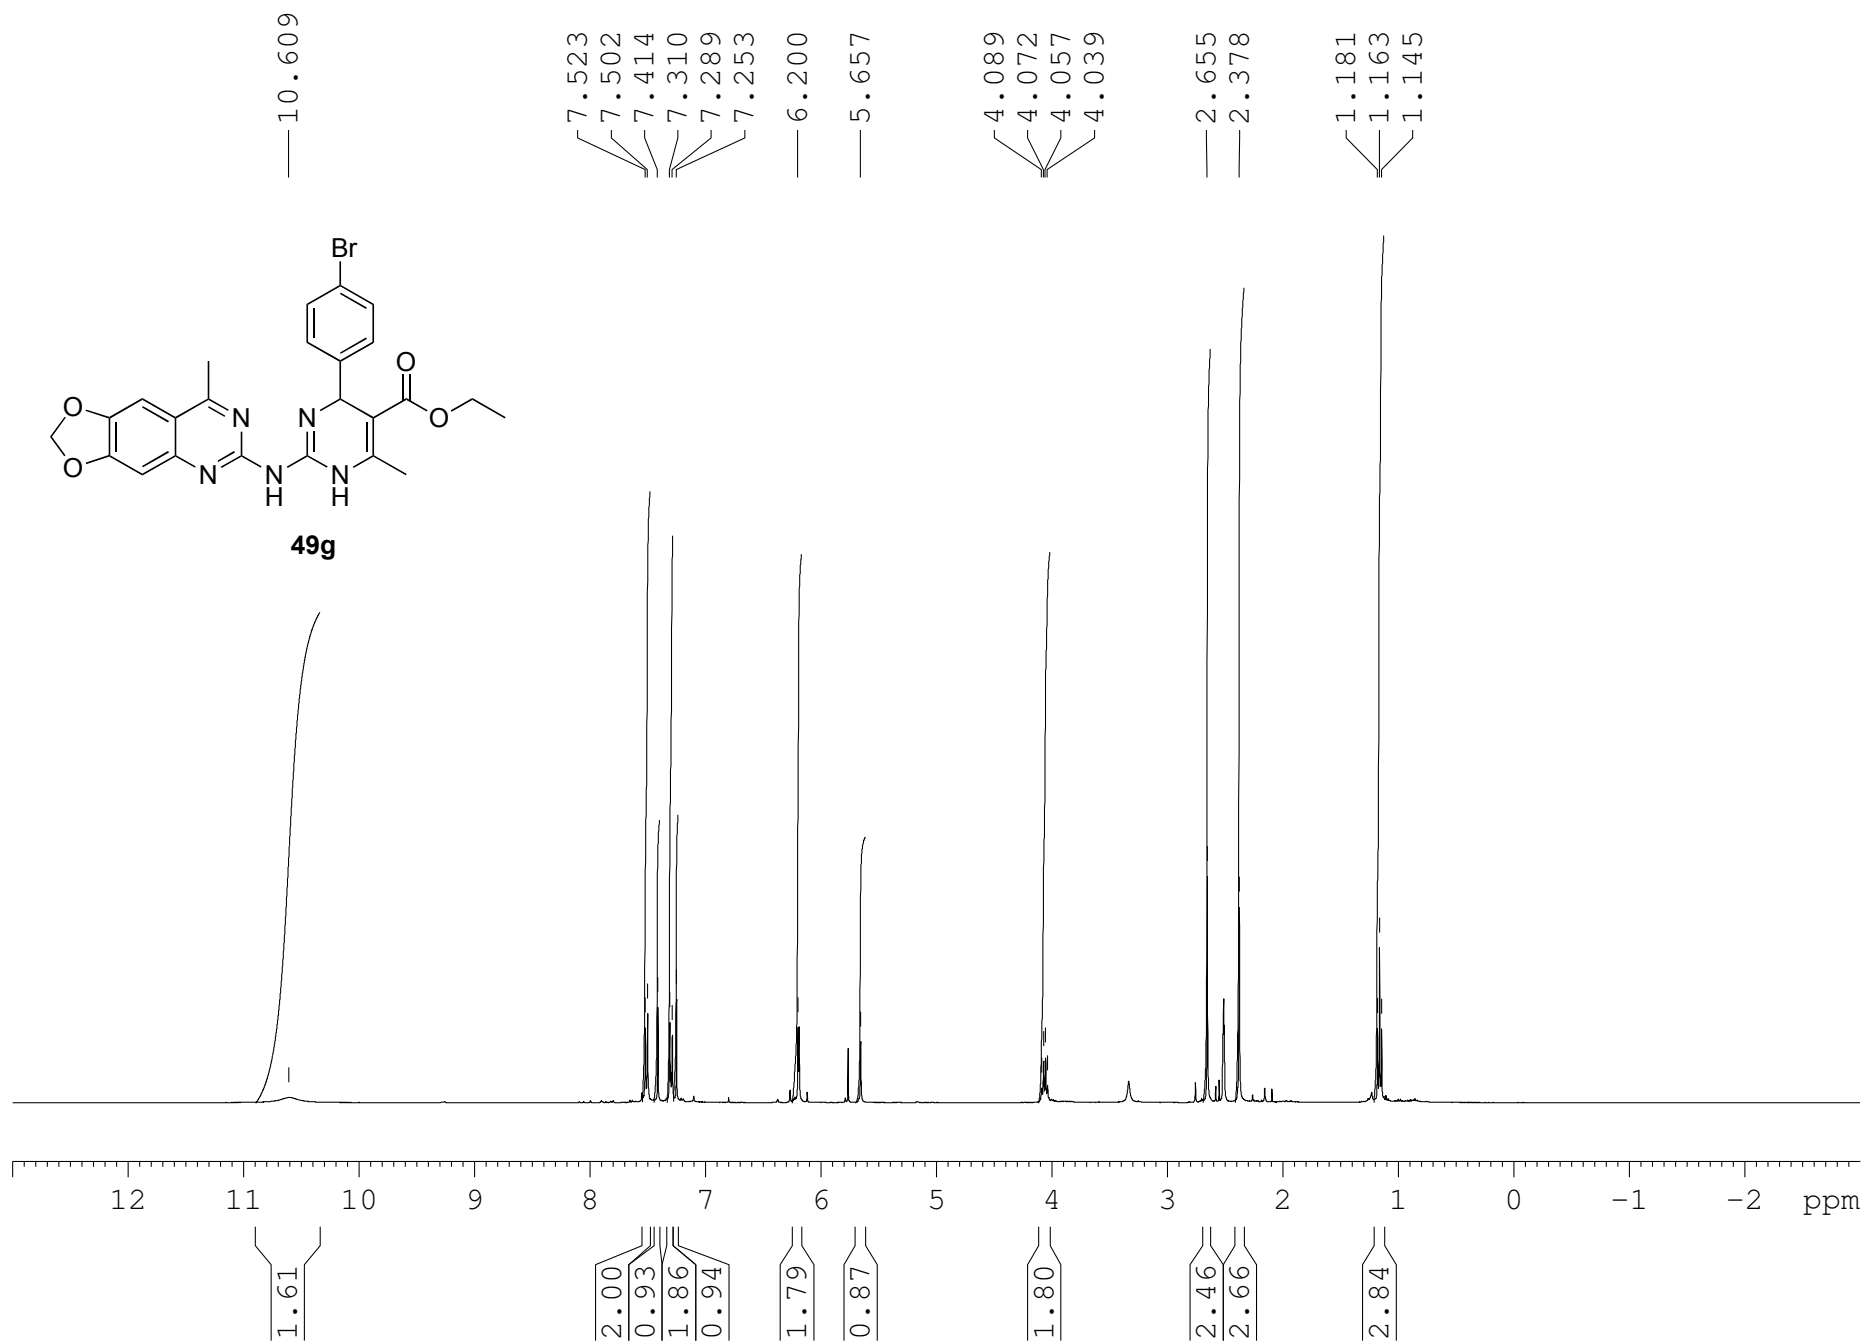

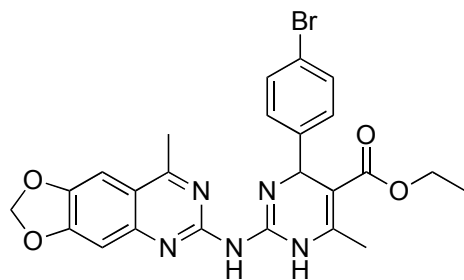

49g

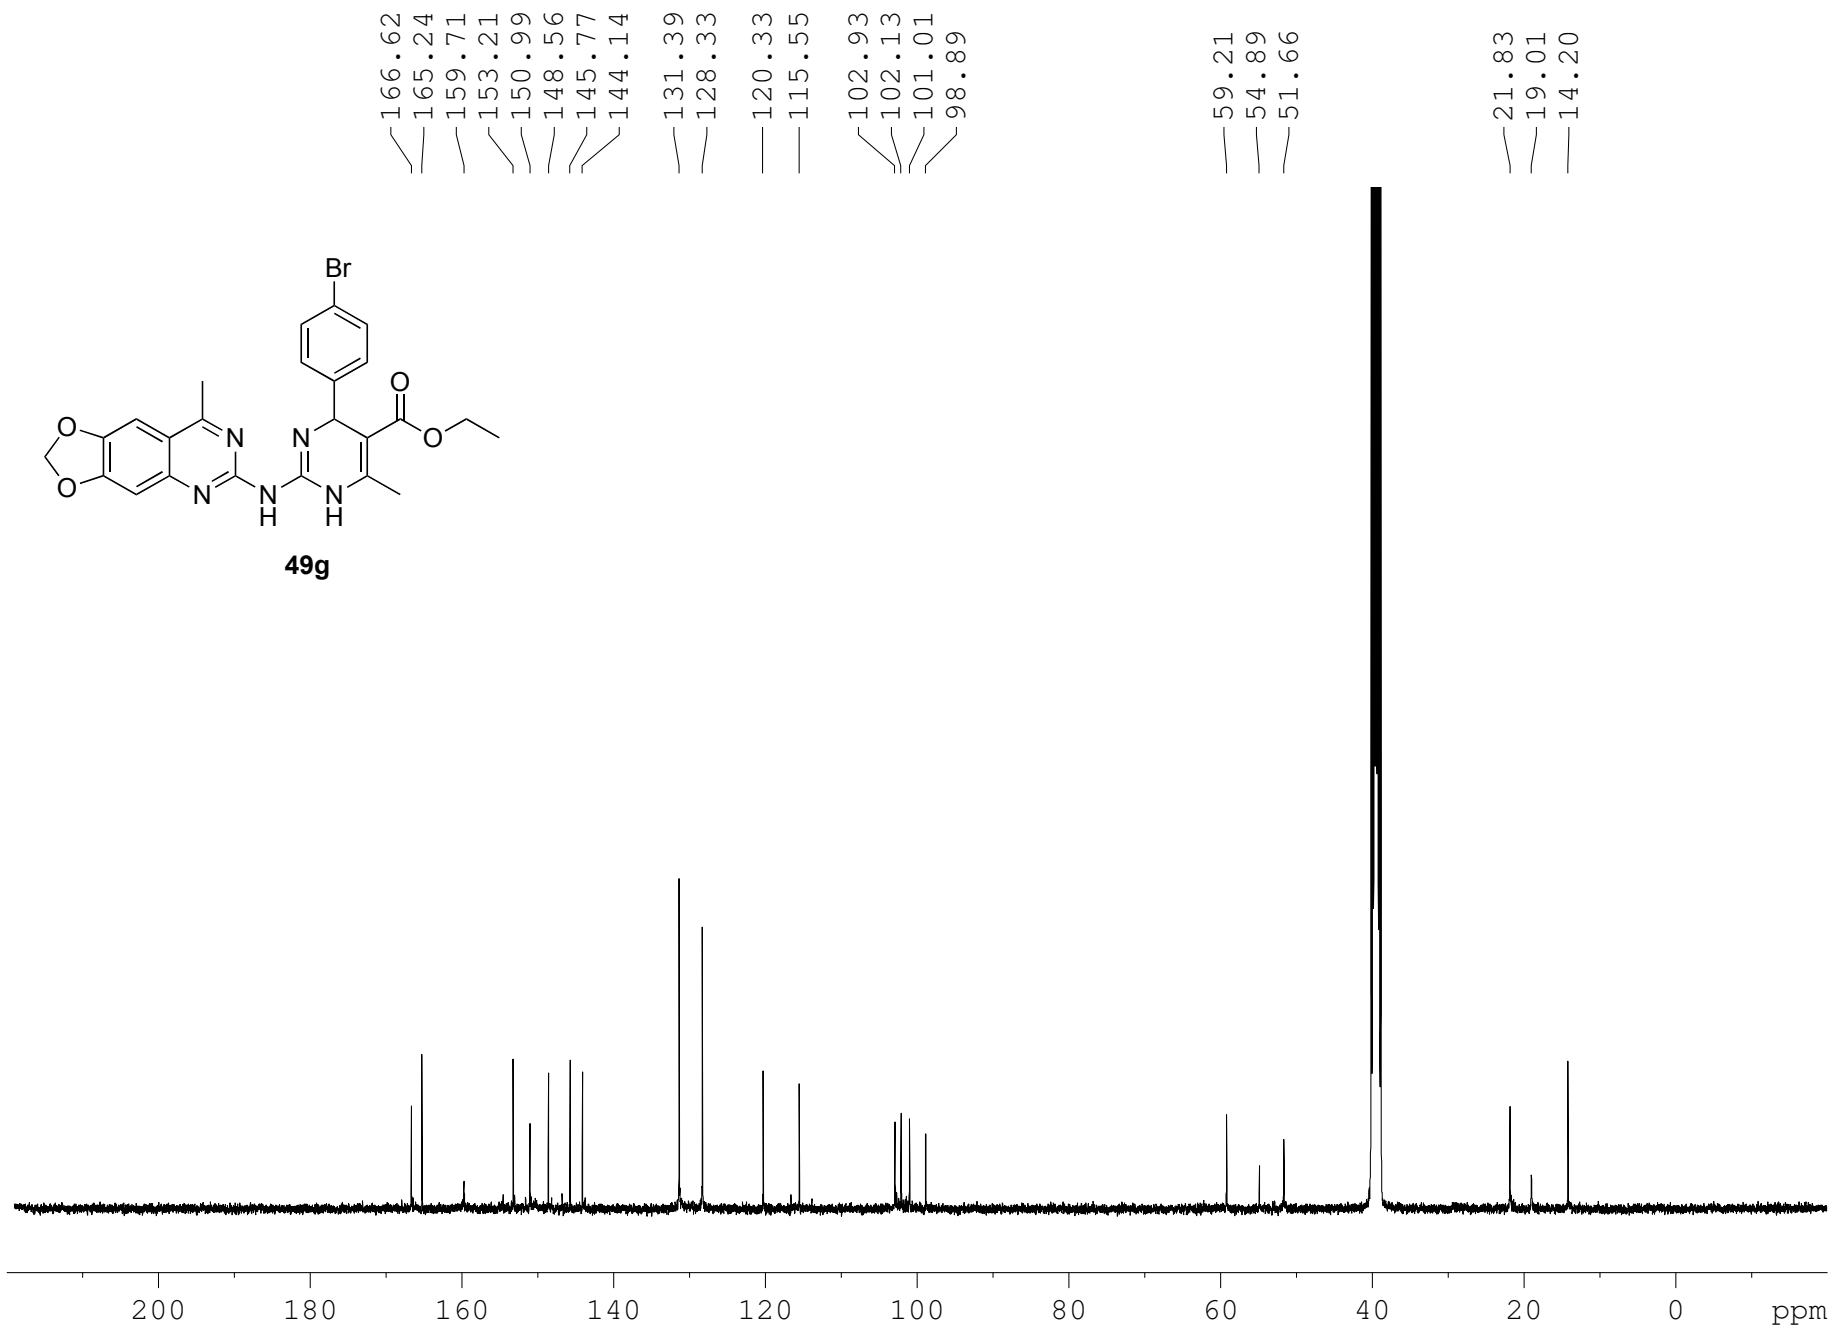

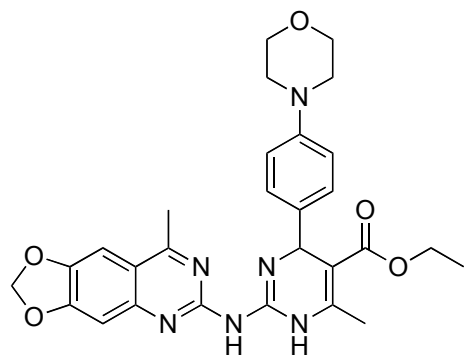

49h

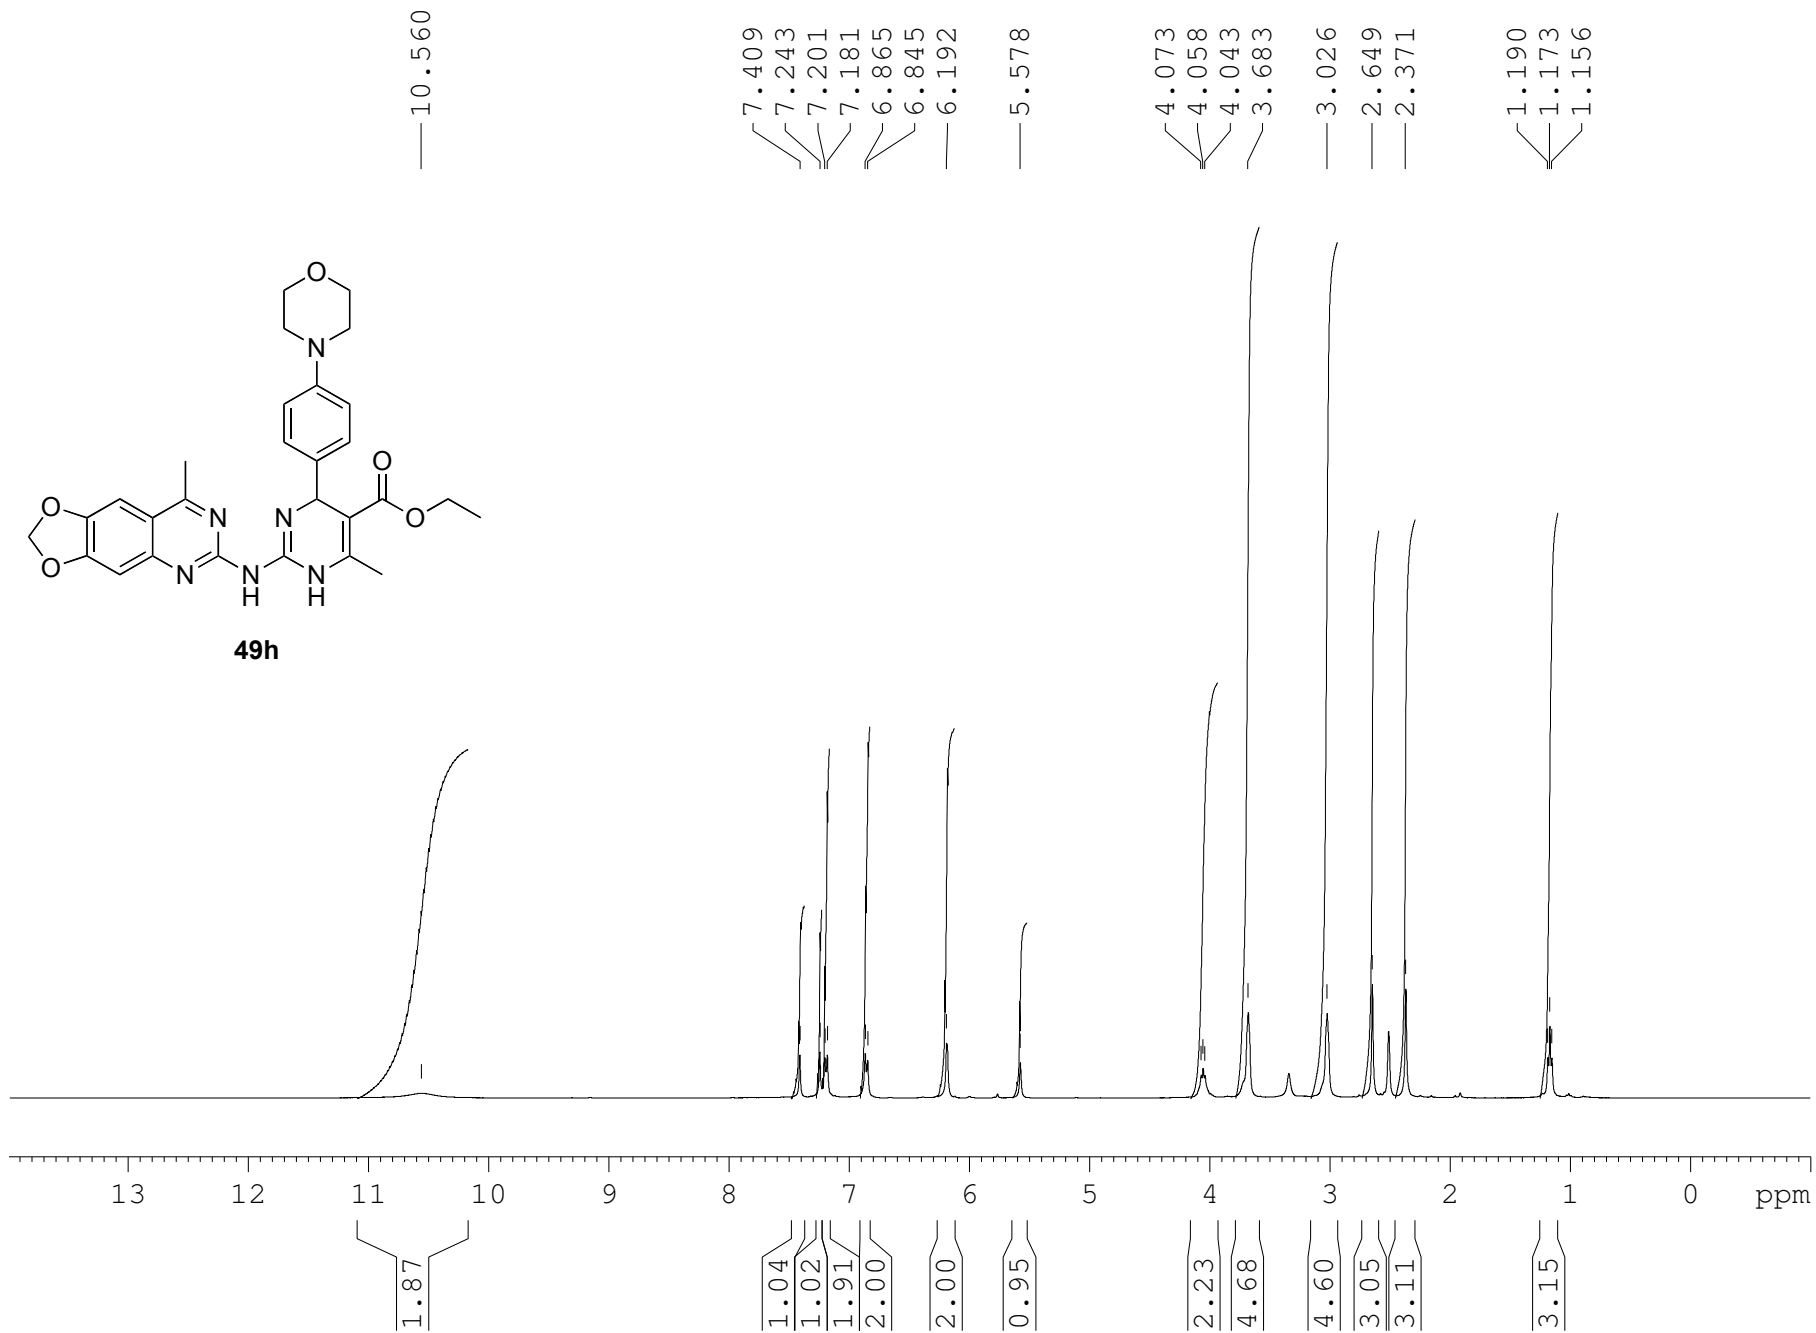

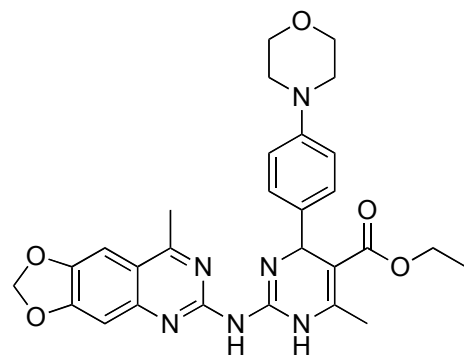

49h

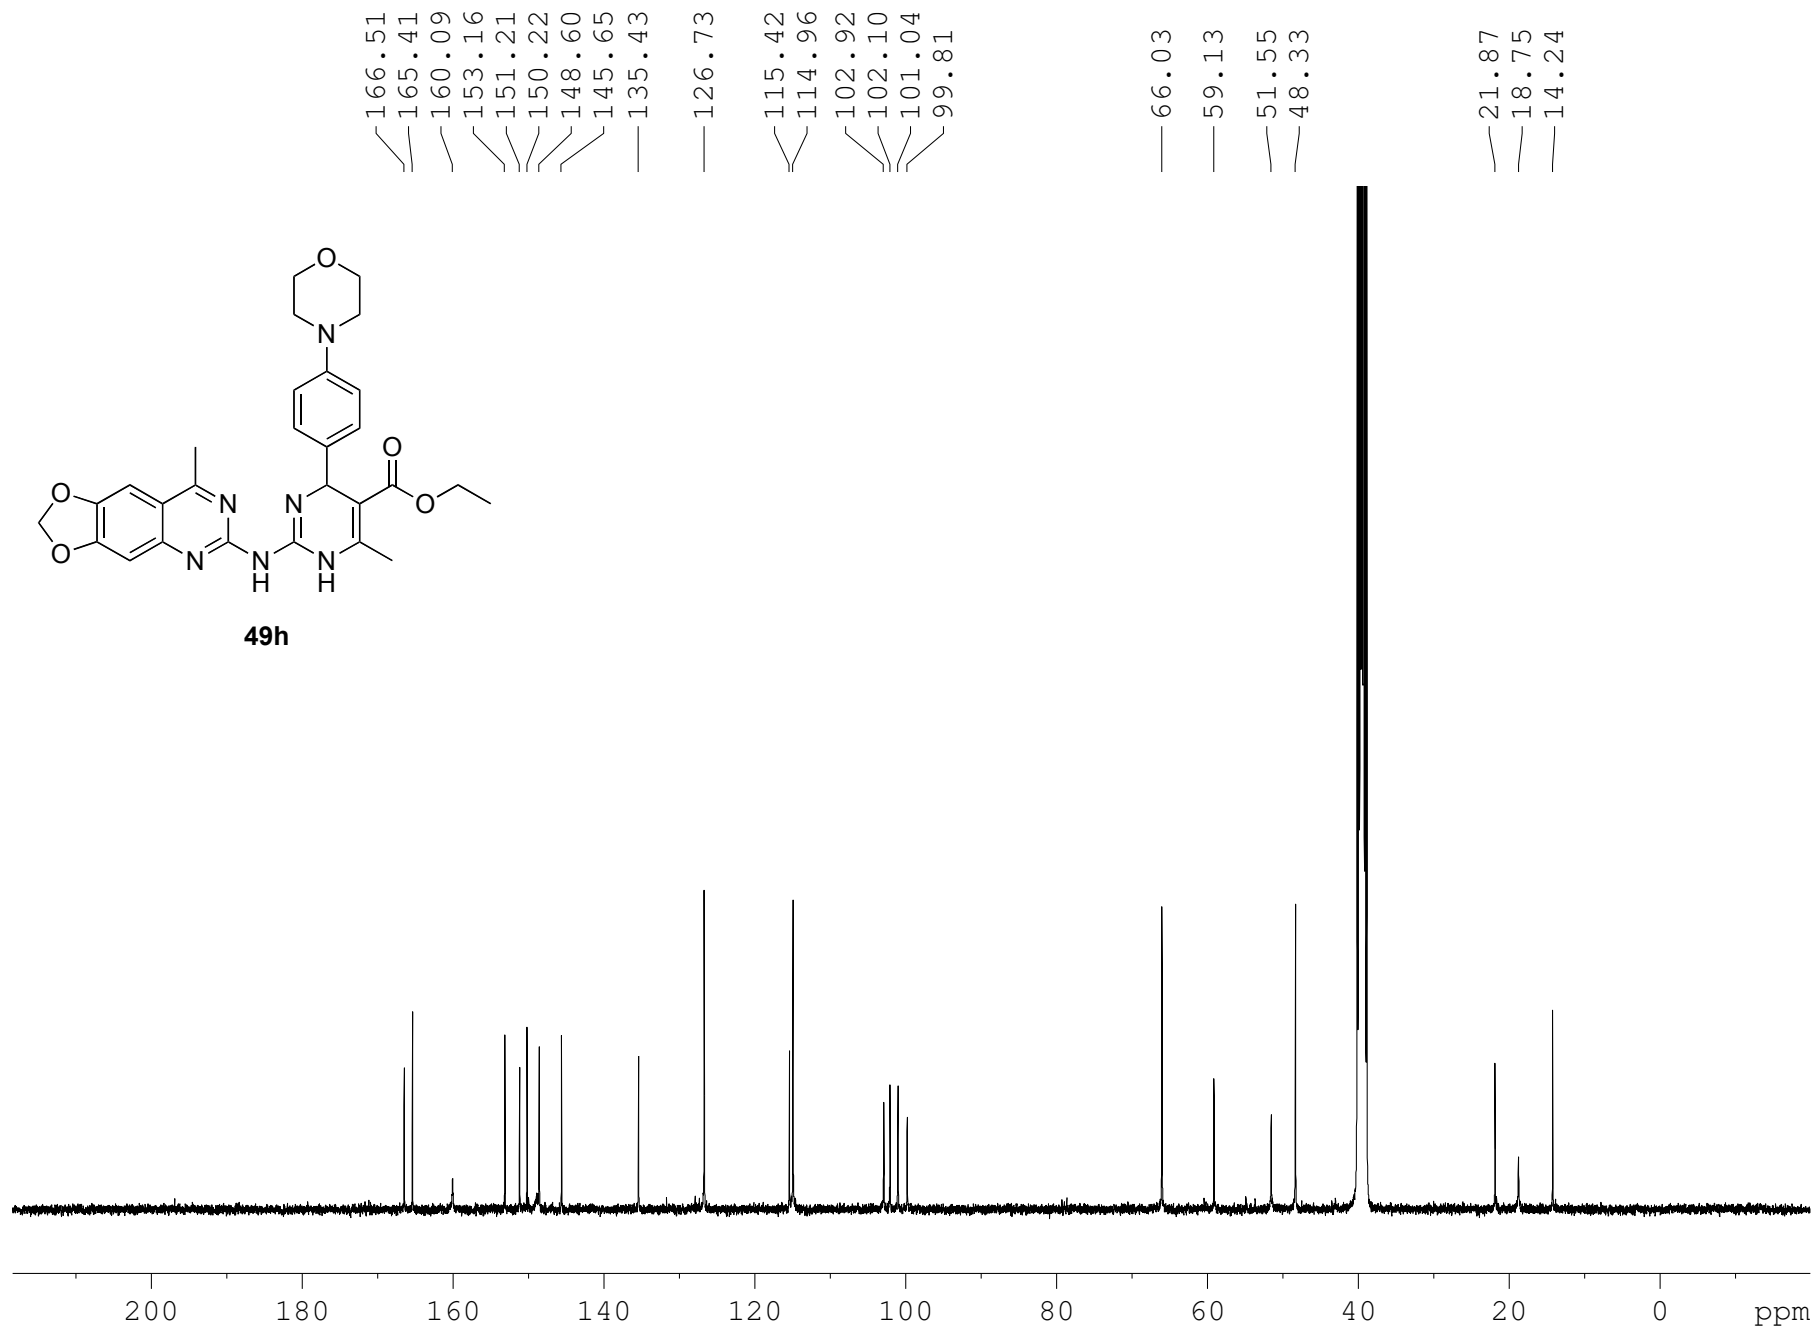

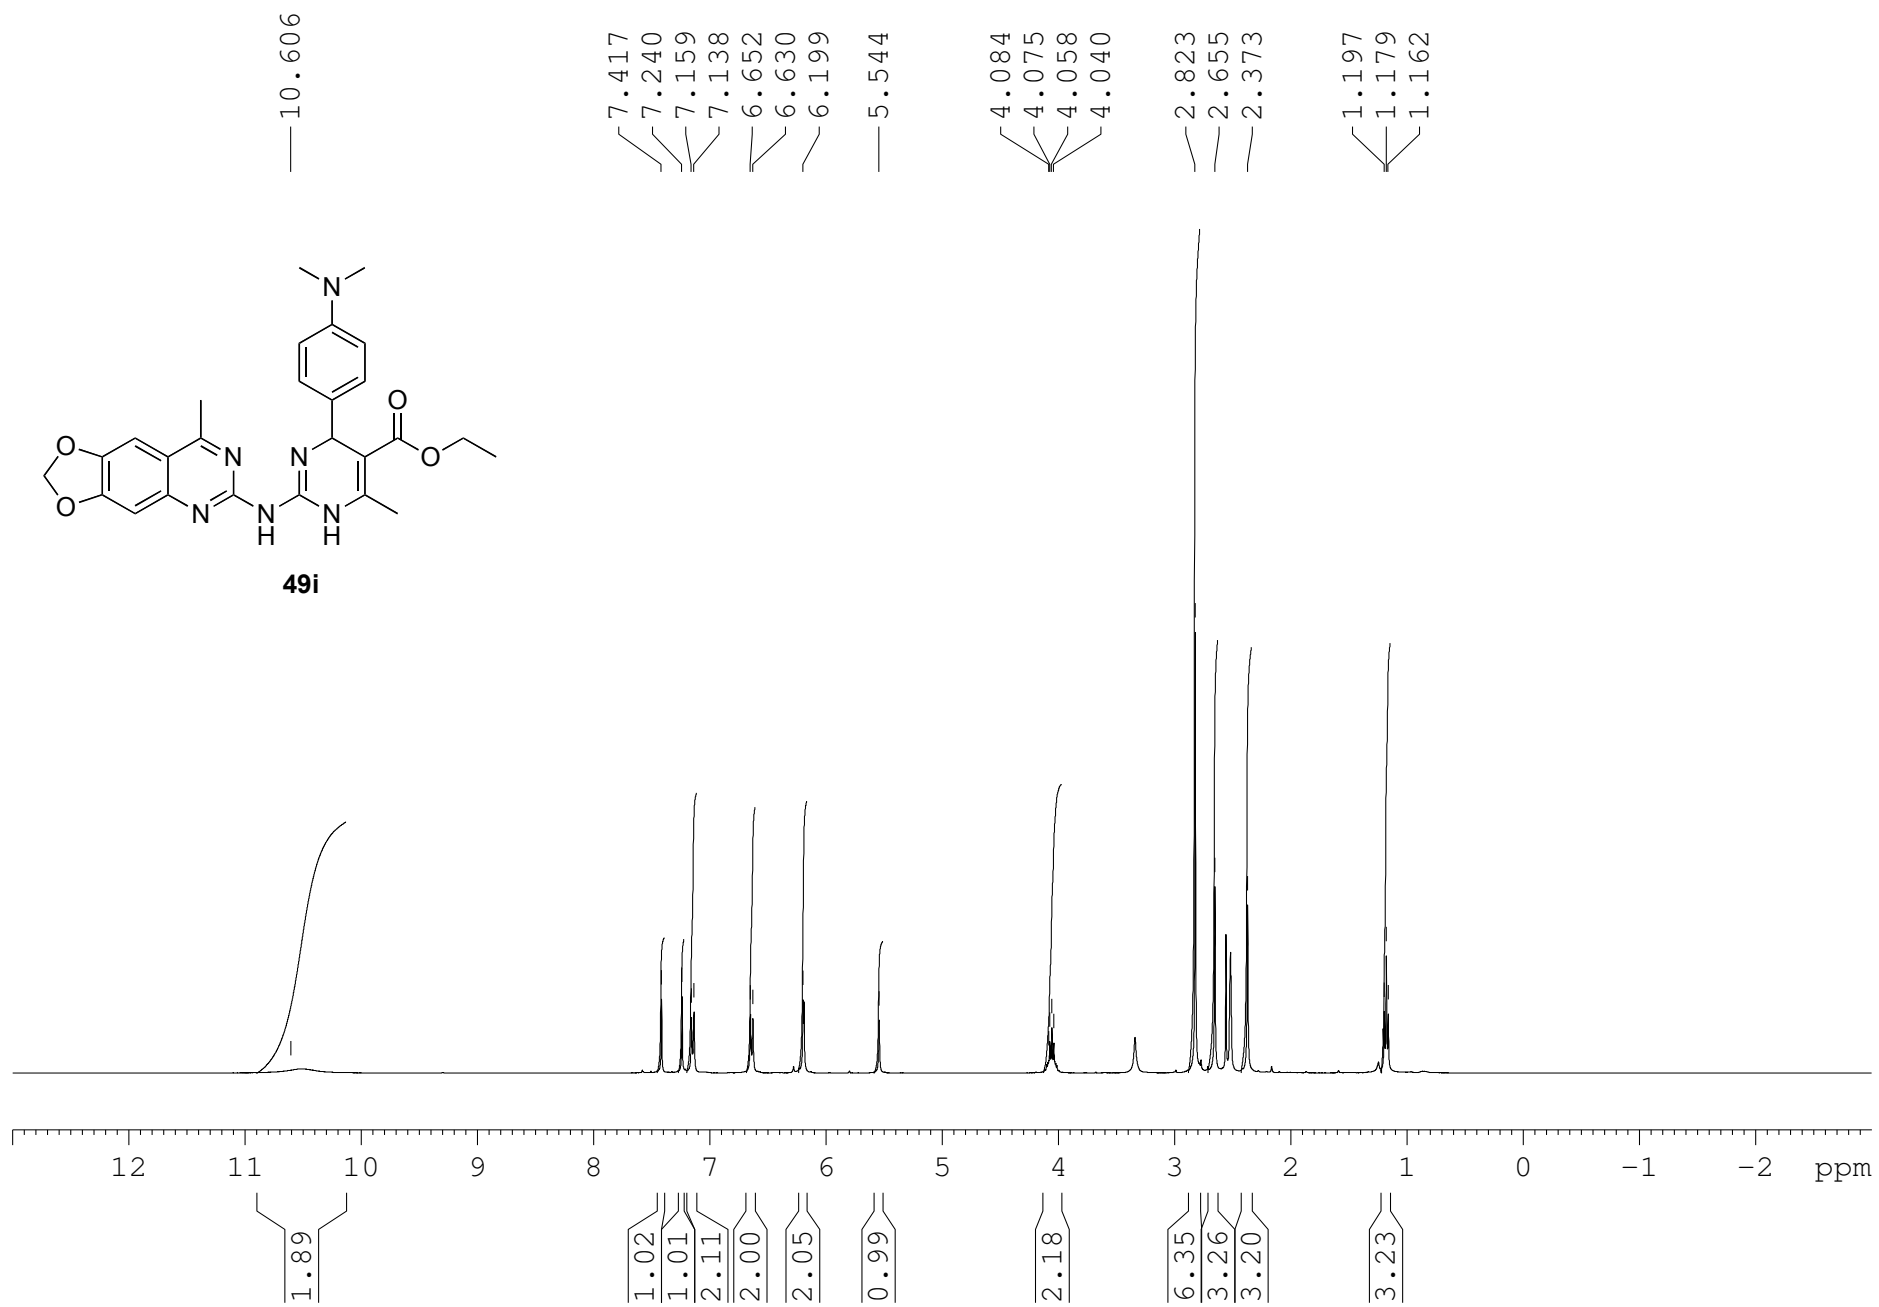

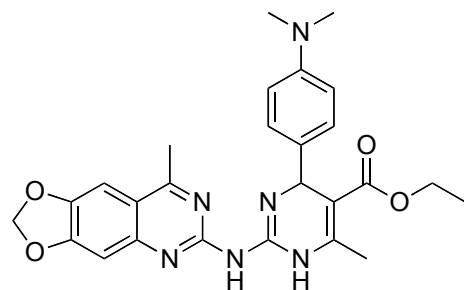

49i

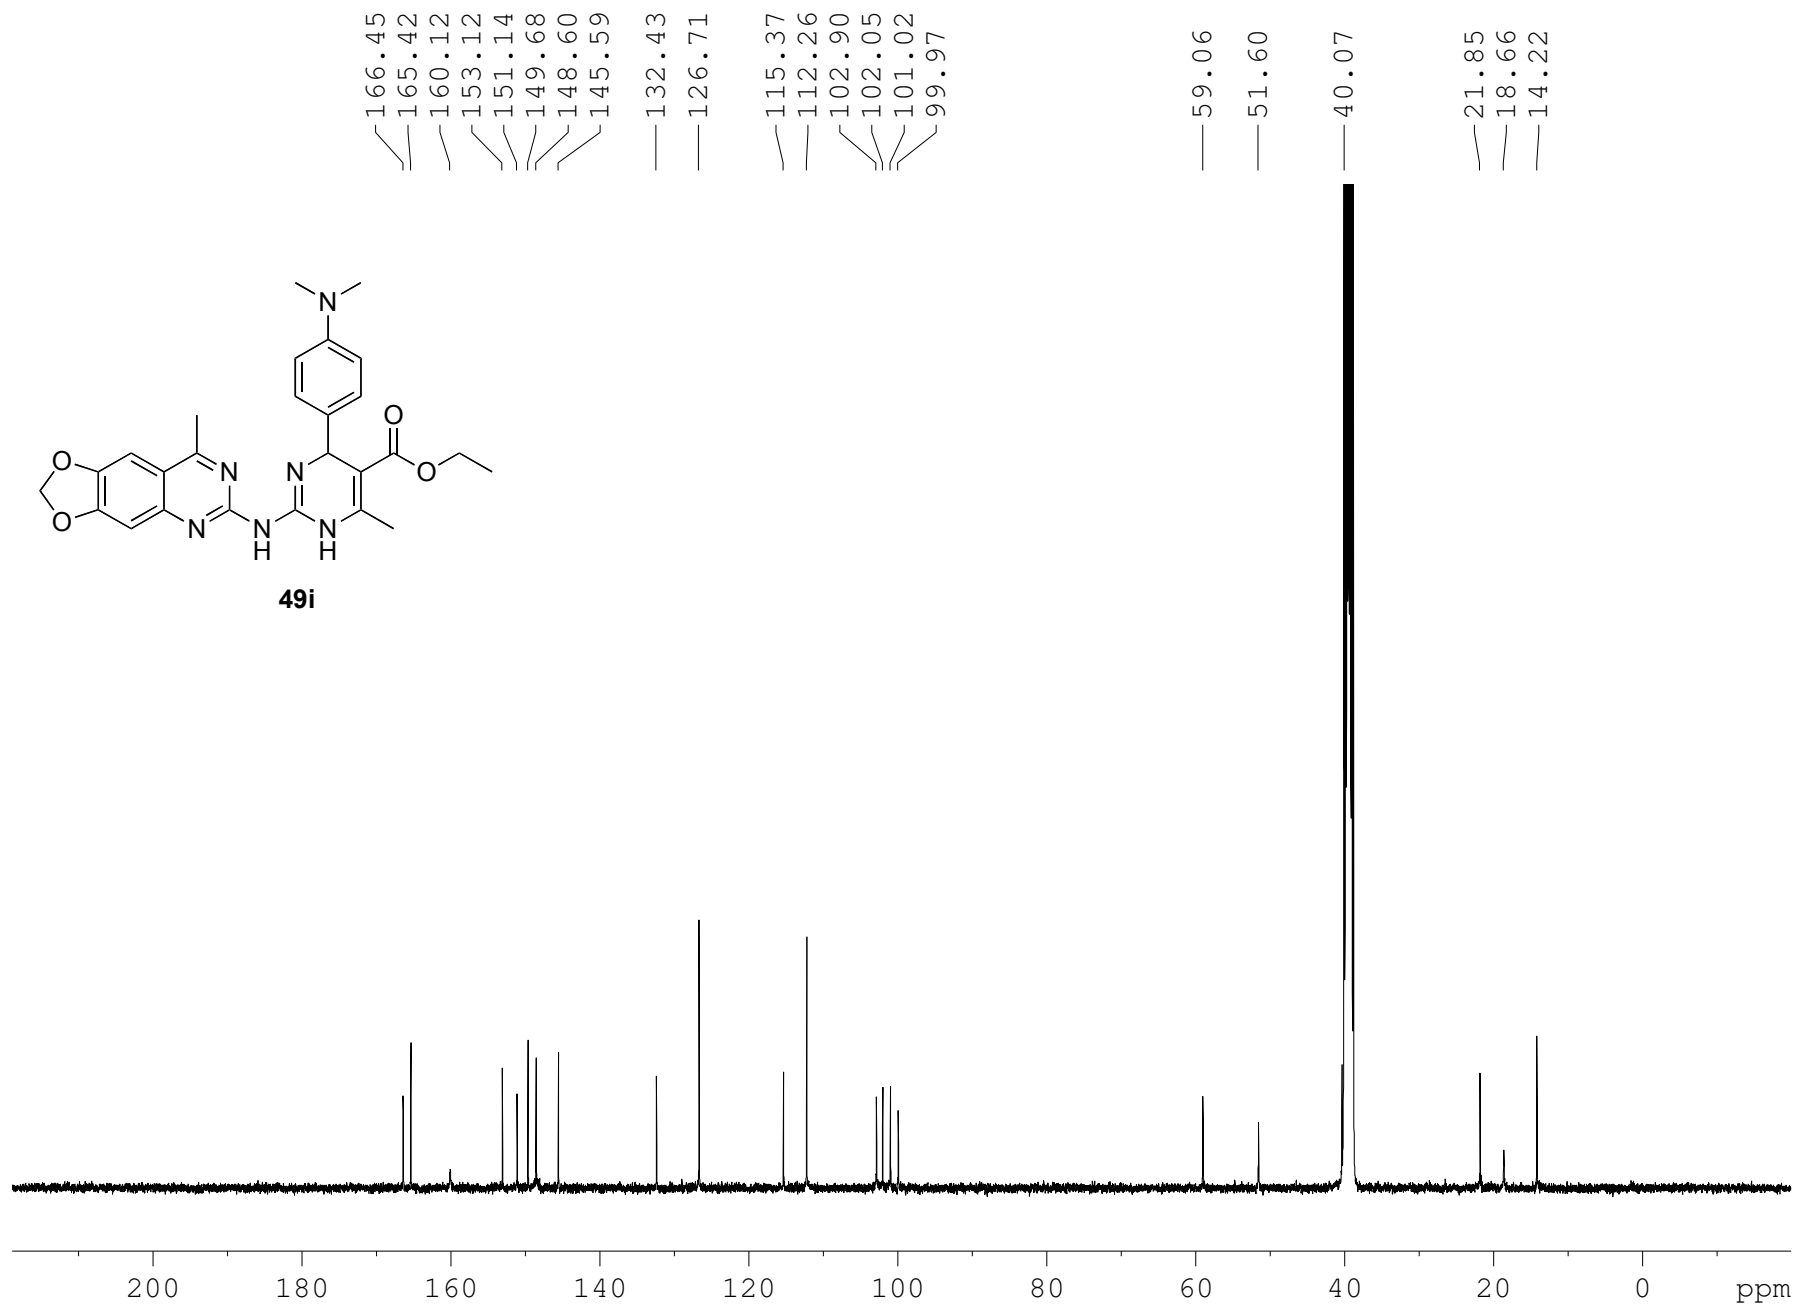

Supplement: NIHMS475562-supplement-01.pdf [file NIHMS475562-supplement-01.pdf]
